# Supplementary material for: A Multi-Network Comparative Analysis of Transcriptome and Translatome Identifies Novel Hub Genes in Cardiac Remodeling
Source: Front Genet. 2020 Nov 16;11:583124. doi: 10.3389/fgene.2020.583124 (PMC7701244; doi:10.3389/fgene.2020.583124)
Supplement: Supplementary Table 5 — Gene ontology enrichment of transcriptome and translatome co-expression modules. [file Table_2.XLSX]

## Sheet: RNA
Cluster	Ontology	GO	Term	Pval	LogEnriched
RNA1	BP	GO:0002483	antigen processing and presentation of e...	2.5e-08	4.20328
RNA1	BP	GO:0002475	antigen processing and presentation via ...	2.4e-07	4.22882
RNA1	BP	GO:0030198	extracellular matrix organization	1.2e-06	2.14561
RNA1	BP	GO:0001916	positive regulation of T cell mediated c...	8.1e-06	3.5009
RNA1	BP	GO:0007155	cell adhesion	2.6e-05	1.31351
RNA1	BP	GO:0010811	positive regulation of cell-substrate ad...	7e-05	2.20645
RNA1	BP	GO:0044406	adhesion of symbiont to host	0.00013	3.78588
RNA1	BP	GO:0061430	bone trabecula morphogenesis	0.0002	3.64386
RNA1	BP	GO:0052652	cyclic purine nucleotide metabolic proce...	0.00029	3.51457
RNA1	BP	GO:0001946	lymphangiogenesis	0.00056	3.2863
RNA1	BP	GO:0001558	regulation of cell growth	0.00079	0.964376
RNA1	BP	GO:0002474	antigen processing and presentation of p...	0.00125	3
RNA1	BP	GO:0050830	defense response to Gram-positive bacter...	0.0016	2.50635
RNA1	BP	GO:0060343	trabecula formation	0.00194	2.8625
RNA1	BP	GO:0042269	regulation of natural killer cell mediat...	0.00246	3.37084
RNA1	BP	GO:0002717	positive regulation of natural killer ce...	0.00253	3.37084
RNA1	BP	GO:0006958	complement activation, classical pathway	0.00253	3.37084
RNA1	BP	GO:0045953	negative regulation of natural killer ce...	0.00253	3.37084
RNA1	BP	GO:0007167	enzyme linked receptor protein signaling...	0.00308	0.784919
RNA1	BP	GO:0050680	negative regulation of epithelial cell p...	0.00326	1.68966
RNA1	BP	GO:0010951	negative regulation of endopeptidase act...	0.0034	1.51457
RNA1	BP	GO:0042832	defense response to protozoan	0.00341	3.22882
RNA1	BP	GO:0060026	convergent extension	0.00341	3.22882
RNA1	BP	GO:0003418	growth plate cartilage chondrocyte diffe...	0.00341	3.22882
RNA1	BP	GO:0003433	chondrocyte development involved in endo...	0.00341	3.22882
RNA1	BP	GO:0060536	cartilage morphogenesis	0.00445	3.09954
RNA1	BP	GO:0072376	protein activation cascade	0.0048	2.8997
RNA1	BP	GO:0014031	mesenchymal cell development	0.00487	1.42469
RNA1	BP	GO:0010463	mesenchymal cell proliferation	0.00489	1.55639
RNA1	BP	GO:2000050	regulation of non-canonical Wnt signalin...	0.00566	2.98089
RNA1	BP	GO:0006508	proteolysis	0.00573	0.231184
RNA1	BP	GO:0043567	regulation of insulin-like growth factor...	0.00705	2.87127
RNA1	BP	GO:0014033	neural crest cell differentiation	0.00797	1.39593
RNA1	BP	GO:0002063	chondrocyte development	0.00837	2.98089
RNA1	BP	GO:0030199	collagen fibril organization	0.00873	1.96578
RNA1	BP	GO:0007157	heterophilic cell-cell adhesion via plas...	0.01038	2.67423
RNA1	BP	GO:0043113	receptor clustering	0.01069	2.18442
RNA1	BP	GO:0042742	defense response to bacterium	0.01141	2.03899
RNA1	BP	GO:0009306	protein secretion	0.01159	0.735249
RNA1	BP	GO:0010466	negative regulation of peptidase activit...	0.01183	1.79141
RNA1	BP	GO:0060740	prostate gland epithelium morphogenesis	0.01234	2.58496
RNA1	BP	GO:0048705	skeletal system morphogenesis	0.01244	1.81519
RNA1	BP	GO:0002478	antigen processing and presentation of e...	0.01449	2.5009
RNA1	BP	GO:0010719	negative regulation of epithelial to mes...	0.01449	2.5009
RNA1	BP	GO:0019934	cGMP-mediated signaling	0.01449	2.5009
RNA1	BP	GO:0007528	neuromuscular junction development	0.01491	2.05889
RNA1	BP	GO:0002237	response to molecule of bacterial origin	0.01644	-0.130931
RNA1	BP	GO:0002040	sprouting angiogenesis	0.01697	0.810966
RNA1	BP	GO:0002526	acute inflammatory response	0.01914	1.93236
RNA1	BP	GO:0001708	cell fate specification	0.0194	2.37084
RNA1	BP	GO:0016525	negative regulation of angiogenesis	0.02	1.45403
RNA1	BP	GO:0010975	regulation of neuron projection developm...	0.02033	0.746901
RNA1	BP	GO:0090090	negative regulation of canonical Wnt sig...	0.02065	1.47393
RNA1	BP	GO:2001259	positive regulation of cation channel ac...	0.02199	1.88897
RNA1	BP	GO:0032469	endoplasmic reticulum calcium ion homeos...	0.02216	2.29808
RNA1	BP	GO:0008584	male gonad development	0.0232	1.61706
RNA1	BP	GO:0003417	growth plate cartilage development	0.02616	3.1078
RNA1	BP	GO:0050880	regulation of blood vessel size	0.02636	1.1899
RNA1	BP	GO:0090263	positive regulation of canonical Wnt sig...	0.02656	1.5649
RNA1	BP	GO:0031103	axon regeneration	0.0266	1.76939
RNA1	BP	GO:0030901	midbrain development	0.02827	2.16273
RNA1	BP	GO:0046546	development of primary male sexual chara...	0.0288	1.85378
RNA1	BP	GO:0043266	regulation of potassium ion transport	0.02903	1.26882
RNA1	BP	GO:1900047	negative regulation of hemostasis	0.02903	2.16273
RNA1	BP	GO:0002448	mast cell mediated immunity	0.02915	1.57777
RNA1	BP	GO:2000116	regulation of cysteine-type endopeptidas...	0.02928	0.0778022
RNA1	BP	GO:0016053	organic acid biosynthetic process	0.0294	-0.231432
RNA1	BP	GO:0032835	glomerulus development	0.03082	1.73697
RNA1	BP	GO:0048546	digestive tract morphogenesis	0.03163	2.09954
RNA1	BP	GO:0050982	detection of mechanical stimulus	0.03255	2.37084
RNA1	BP	GO:0010224	response to UV-B	0.03271	2.78588
RNA1	BP	GO:0035457	cellular response to interferon-alpha	0.03271	2.78588
RNA1	BP	GO:0006910	phagocytosis, recognition	0.03271	2.78588
RNA1	BP	GO:0010561	negative regulation of glycoprotein bios...	0.03271	2.78588
RNA1	BP	GO:0010523	negative regulation of calcium ion trans...	0.03271	2.78588
RNA1	BP	GO:0016322	neuron remodeling	0.03271	2.78588
RNA1	BP	GO:0031106	septin ring organization	0.03271	2.78588
RNA1	BP	GO:0043065	positive regulation of apoptotic process	0.03376	0.571448
RNA1	BP	GO:0001658	branching involved in ureteric bud morph...	0.03519	2.03899
RNA1	BP	GO:0008285	negative regulation of cell proliferatio...	0.03756	0.984347
RNA1	BP	GO:0043433	negative regulation of DNA-binding trans...	0.03802	1.23204
RNA1	BP	GO:0035108	limb morphogenesis	0.03809	1.79211
RNA1	BP	GO:0007338	single fertilization	0.03871	1.81097
RNA1	BP	GO:0060071	Wnt signaling pathway, planar cell polar...	0.03876	2.64386
RNA1	BP	GO:0010453	regulation of cell fate commitment	0.03923	2.64386
RNA1	BP	GO:0044068	modulation by symbiont of host cellular ...	0.03923	2.64386
RNA1	BP	GO:0030240	skeletal muscle thin filament assembly	0.03923	2.64386
RNA1	BP	GO:1901626	regulation of postsynaptic membrane orga...	0.03923	2.64386
RNA1	BP	GO:0090179	planar cell polarity pathway involved in...	0.03923	2.64386
RNA1	BP	GO:0043931	ossification involved in bone maturation	0.03923	2.64386
RNA1	BP	GO:0016477	cell migration	0.03978	0.527587
RNA1	BP	GO:0098609	cell-cell adhesion	0.04154	0.94634
RNA1	BP	GO:0050710	negative regulation of cytokine secretio...	0.0429	1.92504
RNA1	BP	GO:0045429	positive regulation of nitric oxide bios...	0.0429	1.92504
RNA1	BP	GO:0050679	positive regulation of epithelial cell p...	0.04369	1.23204
RNA1	BP	GO:0048839	inner ear development	0.04567	1.51457
RNA1	BP	GO:0050921	positive regulation of chemotaxis	0.04583	1.13289
RNA1	BP	GO:0045725	positive regulation of glycogen biosynth...	0.04618	2.51457
RNA1	BP	GO:0060055	angiogenesis involved in wound healing	0.04618	2.51457
RNA1	BP	GO:0042994	cytoplasmic sequestering of transcriptio...	0.04618	2.51457
RNA1	BP	GO:0032816	positive regulation of natural killer ce...	0.04618	2.51457
RNA1	BP	GO:0035115	embryonic forelimb morphogenesis	0.04618	2.51457
RNA1	BP	GO:0030852	regulation of granulocyte differentiatio...	0.04618	2.51457
RNA1	BP	GO:0099560	synaptic membrane adhesion	0.04618	2.51457
RNA1	BP	GO:0060766	negative regulation of androgen receptor...	0.04618	2.51457
RNA1	BP	GO:0010977	negative regulation of neuron projection...	0.0474	1.13833
RNA2	BP	GO:0015031	protein transport	0.0015	1.81097
RNA2	BP	GO:0030149	sphingolipid catabolic process	0.0164	5.64386
RNA2	BP	GO:0021517	ventral spinal cord development	0.0184	5.64386
RNA2	BP	GO:0034381	plasma lipoprotein particle clearance	0.0194	5.64386
RNA2	BP	GO:0006891	intra-Golgi vesicle-mediated transport	0.0224	5.64386
RNA2	BP	GO:1903432	regulation of TORC1 signaling	0.0245	5.64386
RNA2	BP	GO:0045824	negative regulation of innate immune res...	0.0265	5.05889
RNA2	BP	GO:0032008	positive regulation of TOR signaling	0.0305	5.05889
RNA2	BP	GO:0034198	cellular response to amino acid starvati...	0.0365	4.64386
RNA2	BP	GO:1901264	carbohydrate derivative transport	0.0385	4.64386
RNA2	BP	GO:0006890	retrograde vesicle-mediated transport, G...	0.0385	4.64386
RNA2	BP	GO:0071230	cellular response to amino acid stimulus	0.0464	4.32193
RNA3	BP	GO:0048566	embryonic digestive tract development	0.00027	4.52838
RNA3	BP	GO:0010832	negative regulation of myotube different...	0.00035	4.42146
RNA3	BP	GO:0048667	cell morphogenesis involved in neuron di...	0.00097	1.64386
RNA3	BP	GO:0030513	positive regulation of BMP signaling pat...	0.002	3.52838
RNA3	BP	GO:0048546	digestive tract morphogenesis	0.00227	3.47393
RNA3	BP	GO:0007040	lysosome organization	0.00384	2.8365
RNA3	BP	GO:0072102	glomerulus morphogenesis	0.00518	4.18442
RNA3	BP	GO:0045606	positive regulation of epidermal cell di...	0.00518	4.18442
RNA3	BP	GO:0045475	locomotor rhythm	0.00518	4.18442
RNA3	BP	GO:0035493	SNARE complex assembly	0.00629	4.05889
RNA3	BP	GO:0002719	negative regulation of cytokine producti...	0.00629	4.05889
RNA3	BP	GO:0007411	axon guidance	0.00659	2.2109
RNA3	BP	GO:0016575	histone deacetylation	0.0071	2.68966
RNA3	BP	GO:0090103	cochlea morphogenesis	0.00749	3.94342
RNA3	BP	GO:0048535	lymph node development	0.00879	3.8365
RNA3	BP	GO:0045687	positive regulation of glial cell differ...	0.01	3.42146
RNA3	BP	GO:0003161	cardiac conduction system development	0.01018	3.64386
RNA3	BP	GO:0007413	axonal fasciculation	0.01018	3.64386
RNA3	BP	GO:0042330	taxis	0.01075	1.22239
RNA3	BP	GO:0042490	mechanoreceptor differentiation	0.01103	2.2863
RNA3	BP	GO:0032092	positive regulation of protein binding	0.01137	2.18442
RNA3	BP	GO:0031338	regulation of vesicle fusion	0.01323	3.47393
RNA3	BP	GO:0045616	regulation of keratinocyte differentiati...	0.01489	3.39593
RNA3	BP	GO:2000178	negative regulation of neural precursor ...	0.01489	3.39593
RNA3	BP	GO:0072012	glomerulus vasculature development	0.01489	3.39593
RNA3	BP	GO:0032653	regulation of interleukin-10 production	0.01489	3.39593
RNA3	BP	GO:0002823	negative regulation of adaptive immune r...	0.01663	3.32193
RNA3	BP	GO:0090630	activation of GTPase activity	0.01691	2.47393
RNA3	BP	GO:0035994	response to muscle stretch	0.01845	3.25154
RNA3	BP	GO:0048663	neuron fate commitment	0.02035	3.18442
RNA3	BP	GO:0071353	cellular response to interleukin-4	0.02035	3.18442
RNA3	BP	GO:0071168	protein localization to chromatin	0.02035	3.18442
RNA3	BP	GO:0048384	retinoic acid receptor signaling pathway	0.02035	3.18442
RNA3	BP	GO:0038083	peptidyl-tyrosine autophosphorylation	0.02035	3.18442
RNA3	BP	GO:0070571	negative regulation of neuron projection...	0.02188	3.94342
RNA3	BP	GO:0007623	circadian rhythm	0.0219	1.71312
RNA3	BP	GO:0046856	phosphatidylinositol dephosphorylation	0.02234	3.12029
RNA3	BP	GO:0051965	positive regulation of synapse assembly	0.02439	3.05889
RNA3	BP	GO:0042147	retrograde transport, endosome to Golgi	0.03004	2.14136
RNA3	BP	GO:1902895	positive regulation of pri-miRNA transcr...	0.03101	2.8365
RNA3	BP	GO:0015031	protein transport	0.03235	0.629689
RNA3	BP	GO:0045620	negative regulation of lymphocyte differ...	0.03269	2.78588
RNA3	BP	GO:0006023	aminoglycan biosynthetic process	0.0327	2.64386
RNA3	BP	GO:0043068	positive regulation of programmed cell d...	0.03271	0.450742
RNA3	BP	GO:0050772	positive regulation of axonogenesis	0.03297	2.14136
RNA3	BP	GO:0046676	negative regulation of insulin secretion	0.03577	2.73697
RNA3	BP	GO:0046627	negative regulation of insulin receptor ...	0.03824	2.68966
RNA3	BP	GO:0045668	negative regulation of osteoblast differ...	0.03824	2.68966
RNA3	BP	GO:0071300	cellular response to retinoic acid	0.03824	2.68966
RNA3	BP	GO:0060485	mesenchyme development	0.03857	0.761213
RNA3	BP	GO:2000515	negative regulation of CD4-positive, alp...	0.0433	3.39593
RNA3	BP	GO:0000184	nuclear-transcribed mRNA catabolic proce...	0.04339	2.59946
RNA3	BP	GO:0009896	positive regulation of catabolic process	0.04342	0.526992
RNA3	BP	GO:0010634	positive regulation of epithelial cell m...	0.04505	1.76121
RNA3	BP	GO:0016477	cell migration	0.04637	0.599462
RNA3	BP	GO:0006914	autophagy	0.0484	1.36309
RNA3	BP	GO:0010508	positive regulation of autophagy	0.04845	1.58496
RNA4	BP	GO:0030199	collagen fibril organization	1.5e-06	4.64386
RNA4	BP	GO:0035987	endodermal cell differentiation	5.8e-05	5.22882
RNA4	BP	GO:0071459	protein localization to chromosome, cent...	0.0013	5.32193
RNA4	BP	GO:0050765	negative regulation of phagocytosis	0.0018	5.05889
RNA4	BP	GO:0007095	mitotic G2 DNA damage checkpoint	0.0024	4.8365
RNA4	BP	GO:0085029	extracellular matrix assembly	0.0024	4.8365
RNA4	BP	GO:0032715	negative regulation of interleukin-6 pro...	0.0045	4.32193
RNA4	BP	GO:0044843	cell cycle G1/S phase transition	0.0045	1.88897
RNA4	BP	GO:0002250	adaptive immune response	0.0056	2.03899
RNA4	BP	GO:0045124	regulation of bone resorption	0.0062	4.05889
RNA4	BP	GO:0097553	calcium ion transmembrane import into cy...	0.0134	2.78588
RNA4	BP	GO:0070373	negative regulation of ERK1 and ERK2 cas...	0.0252	3
RNA4	BP	GO:1902903	regulation of supramolecular fiber organ...	0.0259	1.82368
RNA4	BP	GO:0007009	plasma membrane organization	0.0316	2.8365
RNA4	BP	GO:0010951	negative regulation of endopeptidase act...	0.0427	2.59946
RNA4	BP	GO:0072539	T-helper 17 cell differentiation	0.0449	4.32193
RNA4	BP	GO:0015682	ferric iron transport	0.0449	4.32193
RNA4	BP	GO:0050650	chondroitin sulfate proteoglycan biosynt...	0.0449	4.32193
RNA4	BP	GO:0090335	regulation of brown fat cell differentia...	0.0449	4.32193
RNA4	BP	GO:0031106	septin ring organization	0.0449	4.32193
RNA4	BP	GO:0032966	negative regulation of collagen biosynth...	0.0449	4.32193
RNA4	BP	GO:0046040	IMP metabolic process	0.0449	4.32193
RNA4	BP	GO:1902992	negative regulation of amyloid precursor...	0.0449	4.32193
RNA4	BP	GO:0010984	regulation of lipoprotein particle clear...	0.0449	4.32193
RNA4	BP	GO:0015732	prostaglandin transport	0.0449	4.32193
RNA4	BP	GO:1905153	regulation of membrane invagination	0.0449	4.32193
RNA4	BP	GO:0006301	postreplication repair	0.0449	4.32193
RNA4	BP	GO:1903053	regulation of extracellular matrix organ...	0.0481	3.94342
RNA4	BP	GO:1902476	chloride transmembrane transport	0.0493	4.32193
RNA4	BP	GO:0072010	glomerular epithelium development	0.0493	4.32193
RNA4	BP	GO:0018158	protein oxidation	0.0493	4.32193
RNA4	BP	GO:0009954	proximal/distal pattern formation	0.0493	4.32193
RNA4	BP	GO:0072337	modified amino acid transport	0.0493	4.32193
RNA4	BP	GO:0002431	Fc receptor mediated stimulatory signali...	0.0493	4.32193
RNA4	BP	GO:0003418	growth plate cartilage chondrocyte diffe...	0.0493	4.32193
RNA4	BP	GO:0010453	regulation of cell fate commitment	0.0493	4.32193
RNA4	BP	GO:0071731	response to nitric oxide	0.0493	4.32193
RNA4	BP	GO:2000369	regulation of clathrin-dependent endocyt...	0.0493	4.32193
RNA4	BP	GO:0003433	chondrocyte development involved in endo...	0.0493	4.32193
RNA5	BP	GO:0045944	positive regulation of transcription by ...	0.0039	2.98089
RNA5	BP	GO:0007389	pattern specification process	0.0047	4.32193
RNA5	BP	GO:0072102	glomerulus morphogenesis	0.0057	6.64386
RNA5	BP	GO:2000310	regulation of NMDA receptor activity	0.0057	6.64386
RNA5	BP	GO:0048704	embryonic skeletal system morphogenesis	0.006	6.64386
RNA5	BP	GO:0033081	regulation of T cell differentiation in ...	0.0069	6.64386
RNA5	BP	GO:1904706	negative regulation of vascular smooth m...	0.0069	6.64386
RNA5	BP	GO:0071498	cellular response to fluid shear stress	0.0069	6.64386
RNA5	BP	GO:1905562	regulation of vascular endothelial cell ...	0.0069	6.64386
RNA5	BP	GO:0090103	cochlea morphogenesis	0.0069	6.64386
RNA5	BP	GO:2001014	regulation of skeletal muscle cell diffe...	0.0069	6.64386
RNA5	BP	GO:0060536	cartilage morphogenesis	0.0069	6.64386
RNA5	BP	GO:0055012	ventricular cardiac muscle cell differen...	0.0074	6.64386
RNA5	BP	GO:0060914	heart formation	0.0074	6.64386
RNA5	BP	GO:0030220	platelet formation	0.0074	6.64386
RNA5	BP	GO:0006925	inflammatory cell apoptotic process	0.0074	6.64386
RNA5	BP	GO:0045666	positive regulation of neuron differenti...	0.0078	3.8365
RNA5	BP	GO:0043496	regulation of protein homodimerization a...	0.008	6.64386
RNA5	BP	GO:0030318	melanocyte differentiation	0.008	6.64386
RNA5	BP	GO:0048596	embryonic camera-type eye morphogenesis	0.0086	6.64386
RNA5	BP	GO:0001709	cell fate determination	0.0086	6.64386
RNA5	BP	GO:0060045	positive regulation of cardiac muscle ce...	0.0091	6.64386
RNA5	BP	GO:0048643	positive regulation of skeletal muscle t...	0.0091	6.64386
RNA5	BP	GO:0045663	positive regulation of myoblast differen...	0.0097	6.64386
RNA5	BP	GO:1904752	regulation of vascular associated smooth...	0.0103	6.64386
RNA5	BP	GO:0045652	regulation of megakaryocyte differentiat...	0.0103	6.64386
RNA5	BP	GO:0035850	epithelial cell differentiation involved...	0.0103	6.64386
RNA5	BP	GO:0001662	behavioral fear response	0.0103	6.64386
RNA5	BP	GO:0001958	endochondral ossification	0.0103	6.64386
RNA5	BP	GO:0030224	monocyte differentiation	0.0108	6.64386
RNA5	BP	GO:0030501	positive regulation of bone mineralizati...	0.0108	6.64386
RNA5	BP	GO:0010922	positive regulation of phosphatase activ...	0.0108	6.64386
RNA5	BP	GO:0014912	negative regulation of smooth muscle cel...	0.0108	6.64386
RNA5	BP	GO:0051145	smooth muscle cell differentiation	0.011	6.05889
RNA5	BP	GO:0071560	cellular response to transforming growth...	0.0111	4.64386
RNA5	BP	GO:0030890	positive regulation of B cell proliferat...	0.0114	6.64386
RNA5	BP	GO:0033032	regulation of myeloid cell apoptotic pro...	0.0114	6.64386
RNA5	BP	GO:0051150	regulation of smooth muscle cell differe...	0.012	6.64386
RNA5	BP	GO:0014898	cardiac muscle hypertrophy in response t...	0.012	6.64386
RNA5	BP	GO:2000727	positive regulation of cardiac muscle ce...	0.0131	6.64386
RNA5	BP	GO:0030857	negative regulation of epithelial cell d...	0.0131	6.64386
RNA5	BP	GO:0001782	B cell homeostasis	0.0131	6.64386
RNA5	BP	GO:0050853	B cell receptor signaling pathway	0.0131	6.64386
RNA5	BP	GO:0048701	embryonic cranial skeleton morphogenesis	0.0131	6.64386
RNA5	BP	GO:0051966	regulation of synaptic transmission, glu...	0.0131	6.64386
RNA5	BP	GO:2000108	positive regulation of leukocyte apoptot...	0.0131	6.64386
RNA5	BP	GO:0050795	regulation of behavior	0.0137	6.64386
RNA5	BP	GO:0043537	negative regulation of blood vessel endo...	0.0137	6.64386
RNA5	BP	GO:0031670	cellular response to nutrient	0.0142	6.64386
RNA5	BP	GO:0001937	negative regulation of endothelial cell ...	0.0148	6.64386
RNA5	BP	GO:0071300	cellular response to retinoic acid	0.0159	5.64386
RNA5	BP	GO:0051216	cartilage development	0.0165	5.05889
RNA5	BP	GO:0045601	regulation of endothelial cell different...	0.0171	5.64386
RNA5	BP	GO:0019083	viral transcription	0.0176	5.64386
RNA5	BP	GO:0010464	regulation of mesenchymal cell prolifera...	0.0176	5.64386
RNA5	BP	GO:0001947	heart looping	0.0176	5.64386
RNA5	BP	GO:0010613	positive regulation of cardiac muscle hy...	0.0187	5.64386
RNA5	BP	GO:0071277	cellular response to calcium ion	0.0193	5.64386
RNA5	BP	GO:0045214	sarcomere organization	0.0193	5.64386
RNA5	BP	GO:0060079	excitatory postsynaptic potential	0.0199	5.64386
RNA5	BP	GO:0001974	blood vessel remodeling	0.0199	5.64386
RNA5	BP	GO:0003179	heart valve morphogenesis	0.0204	5.64386
RNA5	BP	GO:0061333	renal tubule morphogenesis	0.0216	5.64386
RNA5	BP	GO:0051963	regulation of synapse assembly	0.0232	5.64386
RNA5	BP	GO:0045669	positive regulation of osteoblast differ...	0.0238	5.64386
RNA5	BP	GO:0072080	nephron tubule development	0.0244	5.64386
RNA5	BP	GO:0071417	cellular response to organonitrogen comp...	0.0248	4.22882
RNA5	BP	GO:0030279	negative regulation of ossification	0.0255	5.05889
RNA5	BP	GO:0071230	cellular response to amino acid stimulus	0.0261	5.05889
RNA5	BP	GO:0006959	humoral immune response	0.0266	5.05889
RNA5	BP	GO:0046928	regulation of neurotransmitter secretion	0.0277	5.05889
RNA5	BP	GO:0003208	cardiac ventricle morphogenesis	0.0294	5.05889
RNA5	BP	GO:0014033	neural crest cell differentiation	0.0294	5.05889
RNA5	BP	GO:0000122	negative regulation of transcription by ...	0.0296	2.78588
RNA5	BP	GO:0060021	roof of mouth development	0.0305	5.05889
RNA5	BP	GO:0003151	outflow tract morphogenesis	0.0311	5.05889
RNA5	BP	GO:0060998	regulation of dendritic spine developmen...	0.0316	5.05889
RNA5	BP	GO:0002062	chondrocyte differentiation	0.0383	4.64386
RNA5	BP	GO:0110020	regulation of actomyosin structure organ...	0.0389	4.64386
RNA5	BP	GO:0002822	regulation of adaptive immune response b...	0.0433	4.64386
RNA5	BP	GO:0032092	positive regulation of protein binding	0.0444	4.32193
RNA5	BP	GO:0055088	lipid homeostasis	0.0455	4.32193
RNA5	BP	GO:0017015	regulation of transforming growth factor...	0.0461	4.32193
RNA5	BP	GO:0001764	neuron migration	0.0494	4.32193
RNA5	BP	GO:0071236	cellular response to antibiotic	0.0494	4.32193
RNA6	BP	GO:0019430	removal of superoxide radicals	0.0004	6.05889
RNA6	BP	GO:0072210	metanephric nephron development	0.00046	6.05889
RNA6	BP	GO:0016525	negative regulation of angiogenesis	0.00053	4.22882
RNA6	BP	GO:1903204	negative regulation of oxidative stress-...	0.0006	5.64386
RNA6	BP	GO:0045766	positive regulation of angiogenesis	0.00061	4.05889
RNA6	BP	GO:0035850	epithelial cell differentiation involved...	0.00067	5.64386
RNA6	BP	GO:0040036	regulation of fibroblast growth factor r...	0.00067	5.64386
RNA6	BP	GO:0030901	midbrain development	0.0011	5.32193
RNA6	BP	GO:0032355	response to estradiol	0.0013	5.32193
RNA6	BP	GO:0071260	cellular response to mechanical stimulus	0.00164	5.05889
RNA6	BP	GO:0043536	positive regulation of blood vessel endo...	0.00169	4.90689
RNA6	BP	GO:0061028	establishment of endothelial barrier	0.00188	4.8365
RNA6	BP	GO:0010596	negative regulation of endothelial cell ...	0.00241	4.8365
RNA6	BP	GO:0046605	regulation of centrosome cycle	0.0027	4.64386
RNA6	BP	GO:1900373	positive regulation of purine nucleotide...	0.00413	5.32193
RNA6	BP	GO:0016239	positive regulation of macroautophagy	0.00578	4.05889
RNA6	BP	GO:0043123	positive regulation of I-kappaB kinase/N...	0.00643	4.05889
RNA6	BP	GO:0051093	negative regulation of developmental pro...	0.00661	2.24013
RNA6	BP	GO:0033138	positive regulation of peptidyl-serine p...	0.00784	3.94342
RNA6	BP	GO:0045944	positive regulation of transcription by ...	0.01185	1.79586
RNA6	BP	GO:1905269	positive regulation of chromatin organiz...	0.01239	3.73697
RNA6	BP	GO:0090140	regulation of mitochondrial fission	0.01639	5.32193
RNA6	BP	GO:1990138	neuron projection extension	0.01758	3.70526
RNA6	BP	GO:0007411	axon guidance	0.01845	3.25154
RNA6	BP	GO:0050880	regulation of blood vessel size	0.01857	3.32193
RNA6	BP	GO:0007398	ectoderm development	0.02155	5.64386
RNA6	BP	GO:0042069	regulation of catecholamine metabolic pr...	0.02155	5.64386
RNA6	BP	GO:0044851	hair cycle phase	0.02155	5.64386
RNA6	BP	GO:0032486	Rap protein signal transduction	0.02155	5.64386
RNA6	BP	GO:0010918	positive regulation of mitochondrial mem...	0.02155	5.64386
RNA6	BP	GO:0061299	retina vasculature morphogenesis in came...	0.02155	5.64386
RNA6	BP	GO:0030949	positive regulation of vascular endothel...	0.02155	5.64386
RNA6	BP	GO:0031069	hair follicle morphogenesis	0.02155	5.64386
RNA6	BP	GO:0060947	cardiac vascular smooth muscle cell diff...	0.02155	5.64386
RNA6	BP	GO:1905331	negative regulation of morphogenesis of ...	0.02155	5.64386
RNA6	BP	GO:0031645	negative regulation of neurological syst...	0.02155	5.64386
RNA6	BP	GO:0072215	regulation of metanephros development	0.02155	5.64386
RNA6	BP	GO:0032966	negative regulation of collagen biosynth...	0.02155	5.64386
RNA6	BP	GO:0072132	mesenchyme morphogenesis	0.02249	5.05889
RNA6	BP	GO:0018209	peptidyl-serine modification	0.02359	2.8365
RNA6	BP	GO:0009954	proximal/distal pattern formation	0.02368	5.64386
RNA6	BP	GO:1903861	positive regulation of dendrite extensio...	0.02368	5.64386
RNA6	BP	GO:0032331	negative regulation of chondrocyte diffe...	0.02368	5.64386
RNA6	BP	GO:0050857	positive regulation of antigen receptor-...	0.02368	5.64386
RNA6	BP	GO:0060571	morphogenesis of an epithelial fold	0.02368	5.64386
RNA6	BP	GO:0031128	developmental induction	0.02368	5.64386
RNA6	BP	GO:1904181	positive regulation of membrane depolari...	0.02368	5.64386
RNA6	BP	GO:0072010	glomerular epithelium development	0.02368	5.64386
RNA6	BP	GO:0044068	modulation by symbiont of host cellular ...	0.02368	5.64386
RNA6	BP	GO:0018904	ether metabolic process	0.0258	5.05889
RNA6	BP	GO:0044827	modulation by host of viral genome repli...	0.0258	5.05889
RNA6	BP	GO:0002052	positive regulation of neuroblast prolif...	0.0258	5.05889
RNA6	BP	GO:0045603	positive regulation of endothelial cell ...	0.0258	5.05889
RNA6	BP	GO:0042634	regulation of hair cycle	0.0258	5.05889
RNA6	BP	GO:2000251	positive regulation of actin cytoskeleto...	0.0258	5.05889
RNA6	BP	GO:0003180	aortic valve morphogenesis	0.0258	5.05889
RNA6	BP	GO:0010155	regulation of proton transport	0.0258	5.05889
RNA6	BP	GO:0014745	negative regulation of muscle adaptation	0.0258	5.05889
RNA6	BP	GO:0061154	endothelial tube morphogenesis	0.0258	5.05889
RNA6	BP	GO:0034312	diol biosynthetic process	0.0258	5.05889
RNA6	BP	GO:0045793	positive regulation of cell size	0.0258	5.05889
RNA6	BP	GO:0035115	embryonic forelimb morphogenesis	0.0258	5.05889
RNA6	BP	GO:2001028	positive regulation of endothelial cell ...	0.0258	5.05889
RNA6	BP	GO:0030204	chondroitin sulfate metabolic process	0.0258	5.05889
RNA6	BP	GO:0070841	inclusion body assembly	0.0258	5.05889
RNA6	BP	GO:0051580	regulation of neurotransmitter uptake	0.0258	5.05889
RNA6	BP	GO:0030728	ovulation	0.0258	5.05889
RNA6	BP	GO:0008219	cell death	0.02754	0.915936
RNA6	BP	GO:0060143	positive regulation of syncytium formati...	0.02792	5.05889
RNA6	BP	GO:0071542	dopaminergic neuron differentiation	0.02792	5.05889
RNA6	BP	GO:0060438	trachea development	0.02792	5.05889
RNA6	BP	GO:1900746	regulation of vascular endothelial growt...	0.02792	5.05889
RNA6	BP	GO:0019228	neuronal action potential	0.02792	5.05889
RNA6	BP	GO:2000136	regulation of cell proliferation involve...	0.02792	5.05889
RNA6	BP	GO:1904925	positive regulation of autophagy of mito...	0.02792	5.05889
RNA6	BP	GO:0051589	negative regulation of neurotransmitter ...	0.02792	5.05889
RNA6	BP	GO:0060914	heart formation	0.02792	5.05889
RNA6	BP	GO:0090141	positive regulation of mitochondrial fis...	0.02792	5.05889
RNA6	BP	GO:0007617	mating behavior	0.02792	5.05889
RNA6	BP	GO:0000578	embryonic axis specification	0.02792	5.05889
RNA6	BP	GO:0015872	dopamine transport	0.02792	5.05889
RNA6	BP	GO:0030201	heparan sulfate proteoglycan metabolic p...	0.02792	5.05889
RNA6	BP	GO:0003184	pulmonary valve morphogenesis	0.02792	5.05889
RNA6	BP	GO:1904424	regulation of GTP binding	0.03004	5.05889
RNA6	BP	GO:0002089	lens morphogenesis in camera-type eye	0.03004	5.05889
RNA6	BP	GO:0048820	hair follicle maturation	0.03004	5.05889
RNA6	BP	GO:0070168	negative regulation of biomineral tissue...	0.03004	5.05889
RNA6	BP	GO:0007263	nitric oxide mediated signal transductio...	0.03004	5.05889
RNA6	BP	GO:0032743	positive regulation of interleukin-2 pro...	0.03004	5.05889
RNA6	BP	GO:0031279	regulation of cyclase activity	0.03004	5.05889
RNA6	BP	GO:0021801	cerebral cortex radial glia guided migra...	0.03004	5.05889
RNA6	BP	GO:0006878	cellular copper ion homeostasis	0.03004	5.05889
RNA6	BP	GO:1903541	regulation of exosomal secretion	0.03004	5.05889
RNA6	BP	GO:0010560	positive regulation of glycoprotein bios...	0.03004	5.05889
RNA6	BP	GO:0061311	cell surface receptor signaling pathway ...	0.03004	5.05889
RNA6	BP	GO:0014002	astrocyte development	0.03004	5.05889
RNA6	BP	GO:0045686	negative regulation of glial cell differ...	0.03215	5.05889
RNA6	BP	GO:1902254	negative regulation of intrinsic apoptot...	0.03215	5.05889
RNA6	BP	GO:0009065	glutamine family amino acid catabolic pr...	0.03215	5.05889
RNA6	BP	GO:1902176	negative regulation of oxidative stress-...	0.03215	5.05889
RNA6	BP	GO:0090201	negative regulation of release of cytoch...	0.03215	5.05889
RNA6	BP	GO:0007063	regulation of sister chromatid cohesion	0.03215	5.05889
RNA6	BP	GO:2000679	positive regulation of transcription reg...	0.03215	5.05889
RNA6	BP	GO:0001709	cell fate determination	0.03215	5.05889
RNA6	BP	GO:1901524	regulation of mitophagy	0.03215	5.05889
RNA6	BP	GO:0090050	positive regulation of cell migration in...	0.03215	5.05889
RNA6	BP	GO:0051339	regulation of lyase activity	0.03215	5.05889
RNA6	BP	GO:0021545	cranial nerve development	0.03215	5.05889
RNA6	BP	GO:0051354	negative regulation of oxidoreductase ac...	0.03215	5.05889
RNA6	BP	GO:0060795	cell fate commitment involved in formati...	0.03215	5.05889
RNA6	BP	GO:0035116	embryonic hindlimb morphogenesis	0.03215	5.05889
RNA6	BP	GO:0051900	regulation of mitochondrial depolarizati...	0.03215	5.05889
RNA6	BP	GO:0031065	positive regulation of histone deacetyla...	0.03215	5.05889
RNA6	BP	GO:0038084	vascular endothelial growth factor signa...	0.03253	5.05889
RNA6	BP	GO:0043085	positive regulation of catalytic activit...	0.03393	2.13079
RNA6	BP	GO:0018149	peptide cross-linking	0.03426	5.05889
RNA6	BP	GO:0033233	regulation of protein sumoylation	0.03426	5.05889
RNA6	BP	GO:0048643	positive regulation of skeletal muscle t...	0.03426	5.05889
RNA6	BP	GO:0046827	positive regulation of protein export fr...	0.03426	5.05889
RNA6	BP	GO:0048169	regulation of long-term neuronal synapti...	0.03426	5.05889
RNA6	BP	GO:1905332	positive regulation of morphogenesis of ...	0.03426	5.05889
RNA6	BP	GO:0003156	regulation of animal organ formation	0.03426	5.05889
RNA6	BP	GO:0060441	epithelial tube branching involved in lu...	0.03426	5.05889
RNA6	BP	GO:1901018	positive regulation of potassium ion tra...	0.03426	5.05889
RNA6	BP	GO:2000573	positive regulation of DNA biosynthetic ...	0.03461	4.18442
RNA6	BP	GO:0051590	positive regulation of neurotransmitter ...	0.03637	4.64386
RNA6	BP	GO:0007176	regulation of epidermal growth factor-ac...	0.03637	4.64386
RNA6	BP	GO:0007094	mitotic spindle assembly checkpoint	0.03637	4.64386
RNA6	BP	GO:0035987	endodermal cell differentiation	0.03637	4.64386
RNA6	BP	GO:0007257	activation of JUN kinase activity	0.03637	4.64386
RNA6	BP	GO:0045671	negative regulation of osteoclast differ...	0.03637	4.64386
RNA6	BP	GO:1902236	negative regulation of endoplasmic retic...	0.03637	4.64386
RNA6	BP	GO:0003203	endocardial cushion morphogenesis	0.03637	4.64386
RNA6	BP	GO:1902914	regulation of protein polyubiquitination	0.03637	4.64386
RNA6	BP	GO:0010803	regulation of tumor necrosis factor-medi...	0.03637	4.64386
RNA6	BP	GO:0035561	regulation of chromatin binding	0.03847	4.64386
RNA6	BP	GO:0060479	lung cell differentiation	0.03847	4.64386
RNA6	BP	GO:0040019	positive regulation of embryonic develop...	0.03847	4.64386
RNA6	BP	GO:0042417	dopamine metabolic process	0.03847	4.64386
RNA6	BP	GO:0032232	negative regulation of actin filament bu...	0.03847	4.64386
RNA6	BP	GO:0001990	regulation of systemic arterial blood pr...	0.03847	4.64386
RNA6	BP	GO:0008053	mitochondrial fusion	0.03847	4.64386
RNA6	BP	GO:0045920	negative regulation of exocytosis	0.03847	4.64386
RNA6	BP	GO:0060041	retina development in camera-type eye	0.0403	4.52838
RNA6	BP	GO:1901976	regulation of cell cycle checkpoint	0.04056	4.64386
RNA6	BP	GO:0045992	negative regulation of embryonic develop...	0.04056	4.64386
RNA6	BP	GO:0003407	neural retina development	0.04056	4.64386
RNA6	BP	GO:0086010	membrane depolarization during action po...	0.04056	4.64386
RNA6	BP	GO:0019048	modulation by virus of host morphology o...	0.04056	4.64386
RNA6	BP	GO:0048806	genitalia development	0.04056	4.64386
RNA6	BP	GO:2000144	positive regulation of DNA-templated tra...	0.04265	4.64386
RNA6	BP	GO:0035774	positive regulation of insulin secretion...	0.04265	4.64386
RNA6	BP	GO:0045815	positive regulation of gene expression, ...	0.04265	4.64386
RNA6	BP	GO:0001708	cell fate specification	0.04265	4.64386
RNA6	BP	GO:0051569	regulation of histone H3-K4 methylation	0.04265	4.64386
RNA6	BP	GO:0048483	autonomic nervous system development	0.04265	4.64386
RNA6	BP	GO:0001702	gastrulation with mouth forming second	0.04265	4.64386
RNA6	BP	GO:0030001	metal ion transport	0.04386	2.59074
RNA6	BP	GO:0030198	extracellular matrix organization	0.0439	2.55639
RNA6	BP	GO:0070979	protein K11-linked ubiquitination	0.04474	4.32193
RNA6	BP	GO:0110111	negative regulation of animal organ morp...	0.04474	4.32193
RNA6	BP	GO:0022602	ovulation cycle process	0.04474	4.32193
RNA6	BP	GO:0014044	Schwann cell development	0.04474	4.32193
RNA6	BP	GO:0050856	regulation of T cell receptor signaling ...	0.04474	4.32193
RNA6	BP	GO:0060977	coronary vasculature morphogenesis	0.04682	4.32193
RNA6	BP	GO:0043267	negative regulation of potassium ion tra...	0.04682	4.32193
RNA6	BP	GO:1903427	negative regulation of reactive oxygen s...	0.04682	4.32193
RNA6	BP	GO:0060042	retina morphogenesis in camera-type eye	0.04682	4.32193
RNA6	BP	GO:2001171	positive regulation of ATP biosynthetic ...	0.04682	4.32193
RNA6	BP	GO:1990090	cellular response to nerve growth factor...	0.04682	4.32193
RNA6	BP	GO:0009790	embryo development	0.04824	1.49411
RNA6	BP	GO:0048599	oocyte development	0.0489	4.32193
RNA6	BP	GO:0051966	regulation of synaptic transmission, glu...	0.0489	4.32193
RNA6	BP	GO:0031641	regulation of myelination	0.0489	4.32193
RNA6	BP	GO:0032212	positive regulation of telomere maintena...	0.0489	4.32193
RNA6	BP	GO:0030857	negative regulation of epithelial cell d...	0.0489	4.32193
RNA6	BP	GO:0090279	regulation of calcium ion import	0.0489	4.32193
RNA6	BP	GO:0098815	modulation of excitatory postsynaptic po...	0.0489	4.32193
RNA6	BP	GO:0030166	proteoglycan biosynthetic process	0.0489	4.32193
RNA6	BP	GO:0002053	positive regulation of mesenchymal cell ...	0.0489	4.32193
RNA7	BP	GO:0031279	regulation of cyclase activity	0.00094	5.32193
RNA7	BP	GO:0051339	regulation of lyase activity	0.00109	5.32193
RNA7	BP	GO:0051930	regulation of sensory perception of pain	0.00157	5.05889
RNA7	BP	GO:0055010	ventricular cardiac muscle tissue morpho...	0.00591	4.05889
RNA7	BP	GO:0030308	negative regulation of cell growth	0.0085	2.8365
RNA7	BP	GO:0045930	negative regulation of mitotic cell cycl...	0.00924	2.76939
RNA7	BP	GO:0097756	negative regulation of blood vessel diam...	0.01284	3.39593
RNA7	BP	GO:0050435	amyloid-beta metabolic process	0.01596	4.64386
RNA7	BP	GO:0030203	glycosaminoglycan metabolic process	0.016	3.73697
RNA7	BP	GO:0048659	smooth muscle cell proliferation	0.01613	2.35845
RNA7	BP	GO:0014909	smooth muscle cell migration	0.01922	3.12029
RNA7	BP	GO:0050880	regulation of blood vessel size	0.02774	3.32193
RNA7	BP	GO:0060047	heart contraction	0.02791	2.67423
RNA7	BP	GO:0046879	hormone secretion	0.02794	2.55639
RNA7	BP	GO:0032092	positive regulation of protein binding	0.02799	2.94342
RNA7	BP	GO:0043062	extracellular structure organization	0.02803	2.32193
RNA7	BP	GO:0009792	embryo development ending in birth or eg...	0.03091	1.42469
RNA7	BP	GO:0001659	temperature homeostasis	0.03194	2.55639
RNA7	BP	GO:0045606	positive regulation of epidermal cell di...	0.03272	5.05889
RNA7	BP	GO:0010224	response to UV-B	0.03272	5.05889
RNA7	BP	GO:0006026	aminoglycan catabolic process	0.03272	5.05889
RNA7	BP	GO:0032486	Rap protein signal transduction	0.03272	5.05889
RNA7	BP	GO:0031645	negative regulation of neurological syst...	0.03272	5.05889
RNA7	BP	GO:0042135	neurotransmitter catabolic process	0.03272	5.05889
RNA7	BP	GO:1902993	positive regulation of amyloid precursor...	0.03272	5.05889
RNA7	BP	GO:1902992	negative regulation of amyloid precursor...	0.03272	5.05889
RNA7	BP	GO:0042069	regulation of catecholamine metabolic pr...	0.03272	5.05889
RNA7	BP	GO:0042541	hemoglobin biosynthetic process	0.03272	5.05889
RNA7	BP	GO:0071467	cellular response to pH	0.03272	5.05889
RNA7	BP	GO:0017014	protein nitrosylation	0.03272	5.05889
RNA7	BP	GO:0042474	middle ear morphogenesis	0.03272	5.05889
RNA7	BP	GO:0051000	positive regulation of nitric-oxide synt...	0.03272	5.05889
RNA7	BP	GO:0019511	peptidyl-proline hydroxylation	0.03272	5.05889
RNA7	BP	GO:0035640	exploration behavior	0.03272	5.05889
RNA7	BP	GO:0034377	plasma lipoprotein particle assembly	0.03272	5.05889
RNA7	BP	GO:0090136	epithelial cell-cell adhesion	0.03272	5.05889
RNA7	BP	GO:0051048	negative regulation of secretion	0.03391	2.90689
RNA7	BP	GO:0072010	glomerular epithelium development	0.03593	4.64386
RNA7	BP	GO:0030240	skeletal muscle thin filament assembly	0.03593	4.64386
RNA7	BP	GO:0002446	neutrophil mediated immunity	0.03593	4.64386
RNA7	BP	GO:1905048	regulation of metallopeptidase activity	0.03593	4.64386
RNA7	BP	GO:0007186	G protein-coupled receptor signaling pat...	0.03604	2.4344
RNA7	BP	GO:0046325	negative regulation of glucose import	0.03914	4.64386
RNA7	BP	GO:0051953	negative regulation of amine transport	0.03914	4.64386
RNA7	BP	GO:0051957	positive regulation of amino acid transp...	0.03914	4.64386
RNA7	BP	GO:0019369	arachidonic acid metabolic process	0.03914	4.64386
RNA7	BP	GO:0035809	regulation of urine volume	0.03914	4.64386
RNA7	BP	GO:0035813	regulation of renal sodium excretion	0.03914	4.64386
RNA7	BP	GO:0010039	response to iron ion	0.03914	4.64386
RNA7	BP	GO:0034497	protein localization to phagophore assem...	0.03914	4.64386
RNA7	BP	GO:0034111	negative regulation of homotypic cell-ce...	0.03914	4.64386
RNA7	BP	GO:0010544	negative regulation of platelet activati...	0.03914	4.64386
RNA7	BP	GO:0036120	cellular response to platelet-derived gr...	0.03914	4.64386
RNA7	BP	GO:0045987	positive regulation of smooth muscle con...	0.03914	4.64386
RNA7	BP	GO:0010998	regulation of translational initiation b...	0.03914	4.64386
RNA7	BP	GO:0021904	dorsal/ventral neural tube patterning	0.03914	4.64386
RNA7	BP	GO:0048704	embryonic skeletal system morphogenesis	0.041	4.05889
RNA7	BP	GO:0003084	positive regulation of systemic arterial...	0.04233	4.64386
RNA7	BP	GO:0042220	response to cocaine	0.04233	4.64386
RNA7	BP	GO:0003081	regulation of systemic arterial blood pr...	0.04233	4.64386
RNA7	BP	GO:0032891	negative regulation of organic acid tran...	0.04233	4.64386
RNA7	BP	GO:0015872	dopamine transport	0.04233	4.64386
RNA7	BP	GO:0010832	negative regulation of myotube different...	0.04233	4.64386
RNA7	BP	GO:0051589	negative regulation of neurotransmitter ...	0.04233	4.64386
RNA7	BP	GO:0045879	negative regulation of smoothened signal...	0.04233	4.64386
RNA7	BP	GO:0010468	regulation of gene expression	0.04456	0.182377
RNA7	BP	GO:0046395	carboxylic acid catabolic process	0.04456	2.21759
RNA7	BP	GO:0050679	positive regulation of epithelial cell p...	0.04467	2.55639
RNA7	BP	GO:0051173	positive regulation of nitrogen compound...	0.04546	-0.214125
RNA7	BP	GO:0090330	regulation of platelet aggregation	0.04551	4.32193
RNA7	BP	GO:0042755	eating behavior	0.04551	4.32193
RNA7	BP	GO:0046838	phosphorylated carbohydrate dephosphoryl...	0.04551	4.32193
RNA7	BP	GO:1901223	negative regulation of NIK/NF-kappaB sig...	0.04551	4.32193
RNA7	BP	GO:0060218	hematopoietic stem cell differentiation	0.04551	4.32193
RNA7	BP	GO:0001946	lymphangiogenesis	0.04551	4.32193
RNA7	BP	GO:0062033	positive regulation of mitotic sister ch...	0.04551	4.32193
RNA7	BP	GO:0051043	regulation of membrane protein ectodomai...	0.04551	4.32193
RNA7	BP	GO:0030212	hyaluronan metabolic process	0.04551	4.32193
RNA7	BP	GO:0090025	regulation of monocyte chemotaxis	0.04869	4.32193
RNA7	BP	GO:0010954	positive regulation of protein processin...	0.04869	4.32193
RNA7	BP	GO:0048739	cardiac muscle fiber development	0.04869	4.32193
RNA7	BP	GO:0048339	paraxial mesoderm development	0.04869	4.32193
RNA7	BP	GO:2000679	positive regulation of transcription reg...	0.04869	4.32193
RNA7	BP	GO:0046464	acylglycerol catabolic process	0.04869	4.32193
RNA7	BP	GO:2000738	positive regulation of stem cell differe...	0.04869	4.32193
RNA7	BP	GO:0008285	negative regulation of cell proliferatio...	0.04967	1.9885
RNA8	BP	GO:0030240	skeletal muscle thin filament assembly	0.0005	6.05889
RNA8	BP	GO:0046638	positive regulation of alpha-beta T cell...	0.0015	5.05889
RNA8	BP	GO:0003407	neural retina development	0.0015	5.05889
RNA8	BP	GO:0048741	skeletal muscle fiber development	0.002	4.8365
RNA8	BP	GO:0060042	retina morphogenesis in camera-type eye	0.002	4.8365
RNA8	BP	GO:0042472	inner ear morphogenesis	0.0038	4.52838
RNA8	BP	GO:1903039	positive regulation of leukocyte cell-ce...	0.0115	3.47393
RNA8	BP	GO:0050865	regulation of cell activation	0.0147	1.88897
RNA8	BP	GO:0006873	cellular ion homeostasis	0.0147	1.65896
RNA8	BP	GO:0050884	neuromuscular process controlling postur...	0.0305	5.05889
RNA8	BP	GO:0002827	positive regulation of T-helper 1 type i...	0.0305	5.05889
RNA8	BP	GO:0031936	negative regulation of chromatin silenci...	0.0305	5.05889
RNA8	BP	GO:0046040	IMP metabolic process	0.0305	5.05889
RNA8	BP	GO:0034143	regulation of toll-like receptor 4 signa...	0.0305	5.05889
RNA8	BP	GO:0050650	chondroitin sulfate proteoglycan biosynt...	0.0305	5.05889
RNA8	BP	GO:0007608	sensory perception of smell	0.0305	5.05889
RNA8	BP	GO:0043069	negative regulation of programmed cell d...	0.0331	0.810966
RNA8	BP	GO:1900402	regulation of carbohydrate metabolic pro...	0.0335	5.05889
RNA8	BP	GO:0072537	fibroblast activation	0.0335	5.05889
RNA8	BP	GO:2000516	positive regulation of CD4-positive, alp...	0.0335	5.05889
RNA8	BP	GO:0016584	nucleosome positioning	0.0335	5.05889
RNA8	BP	GO:0048070	regulation of developmental pigmentation	0.0335	5.05889
RNA8	BP	GO:0090179	planar cell polarity pathway involved in...	0.0335	5.05889
RNA8	BP	GO:0045063	T-helper 1 cell differentiation	0.0335	5.05889
RNA8	BP	GO:0032402	melanosome transport	0.0335	5.05889
RNA8	BP	GO:0033033	negative regulation of myeloid cell apop...	0.0335	5.05889
RNA8	BP	GO:0048490	anterograde synaptic vesicle transport	0.0335	5.05889
RNA8	BP	GO:0045765	regulation of angiogenesis	0.0359	2.76121
RNA8	BP	GO:0055083	monovalent inorganic anion homeostasis	0.0365	4.64386
RNA8	BP	GO:0045623	negative regulation of T-helper cell dif...	0.0365	4.64386
RNA8	BP	GO:0090103	cochlea morphogenesis	0.0365	4.64386
RNA8	BP	GO:0030204	chondroitin sulfate metabolic process	0.0365	4.64386
RNA8	BP	GO:1901071	glucosamine-containing compound metaboli...	0.0365	4.64386
RNA8	BP	GO:0001780	neutrophil homeostasis	0.0365	4.64386
RNA8	BP	GO:0032957	inositol trisphosphate metabolic process	0.0365	4.64386
RNA8	BP	GO:0008206	bile acid metabolic process	0.0365	4.64386
RNA8	BP	GO:0045061	thymic T cell selection	0.0365	4.64386
RNA8	BP	GO:0044321	response to leptin	0.0365	4.64386
RNA8	BP	GO:0046325	negative regulation of glucose import	0.0365	4.64386
RNA8	BP	GO:0048566	embryonic digestive tract development	0.0365	4.64386
RNA8	BP	GO:0002029	desensitization of G protein-coupled rec...	0.0395	4.64386
RNA8	BP	GO:0002043	blood vessel endothelial cell proliferat...	0.0395	4.64386
RNA8	BP	GO:0006925	inflammatory cell apoptotic process	0.0395	4.64386
RNA8	BP	GO:0010893	positive regulation of steroid biosynthe...	0.0395	4.64386
RNA8	BP	GO:0046033	AMP metabolic process	0.0395	4.64386
RNA8	BP	GO:1902042	negative regulation of extrinsic apoptot...	0.0395	4.64386
RNA8	BP	GO:0061756	leukocyte adhesion to vascular endotheli...	0.0395	4.64386
RNA8	BP	GO:1902043	positive regulation of extrinsic apoptot...	0.0424	4.64386
RNA8	BP	GO:0042755	eating behavior	0.0424	4.64386
RNA8	BP	GO:0002828	regulation of type 2 immune response	0.0424	4.64386
RNA8	BP	GO:0035082	axoneme assembly	0.0424	4.64386
RNA8	BP	GO:0045332	phospholipid translocation	0.0424	4.64386
RNA8	BP	GO:0043473	pigmentation	0.044	3.55639
RNA8	BP	GO:0007512	adult heart development	0.0454	4.32193
RNA8	BP	GO:0062009	secondary palate development	0.0454	4.32193
RNA8	BP	GO:0010869	regulation of receptor biosynthetic proc...	0.0454	4.32193
RNA8	BP	GO:2000679	positive regulation of transcription reg...	0.0454	4.32193
RNA8	BP	GO:0048643	positive regulation of skeletal muscle t...	0.0484	4.32193
RNA8	BP	GO:0045745	positive regulation of G protein-coupled...	0.0484	4.32193
RNA8	BP	GO:0022617	extracellular matrix disassembly	0.0484	4.32193
RNA8	BP	GO:0044342	type B pancreatic cell proliferation	0.0484	4.32193
RNA9	BP	GO:0032715	negative regulation of interleukin-6 pro...	0.00033	6.05889
RNA9	BP	GO:0032720	negative regulation of tumor necrosis fa...	0.00054	5.64386
RNA9	BP	GO:0002244	hematopoietic progenitor cell differenti...	0.00453	4.32193
RNA9	BP	GO:0070372	regulation of ERK1 and ERK2 cascade	0.01045	3.76939
RNA9	BP	GO:0045019	negative regulation of nitric oxide bios...	0.01253	6.64386
RNA9	BP	GO:1902932	positive regulation of alcohol biosynthe...	0.01253	6.64386
RNA9	BP	GO:0050832	defense response to fungus	0.01253	6.64386
RNA9	BP	GO:1900016	negative regulation of cytokine producti...	0.01253	6.64386
RNA9	BP	GO:0071380	cellular response to prostaglandin E sti...	0.01253	6.64386
RNA9	BP	GO:0006910	phagocytosis, recognition	0.01253	6.64386
RNA9	BP	GO:0032682	negative regulation of chemokine product...	0.01377	6.64386
RNA9	BP	GO:0032957	inositol trisphosphate metabolic process	0.01501	5.64386
RNA9	BP	GO:0019682	glyceraldehyde-3-phosphate metabolic pro...	0.01501	5.64386
RNA9	BP	GO:0050860	negative regulation of T cell receptor s...	0.01501	5.64386
RNA9	BP	GO:0051156	glucose 6-phosphate metabolic process	0.01501	5.64386
RNA9	BP	GO:0002920	regulation of humoral immune response	0.01626	5.64386
RNA9	BP	GO:0030220	platelet formation	0.01626	5.64386
RNA9	BP	GO:0046184	aldehyde biosynthetic process	0.01626	5.64386
RNA9	BP	GO:0050765	negative regulation of phagocytosis	0.0175	5.64386
RNA9	BP	GO:0002455	humoral immune response mediated by circ...	0.0175	5.64386
RNA9	BP	GO:0070230	positive regulation of lymphocyte apopto...	0.0175	5.64386
RNA9	BP	GO:0032688	negative regulation of interferon-beta p...	0.0175	5.64386
RNA9	BP	GO:0035855	megakaryocyte development	0.01873	5.64386
RNA9	BP	GO:0032958	inositol phosphate biosynthetic process	0.01997	5.64386
RNA9	BP	GO:0007252	I-kappaB phosphorylation	0.01997	5.64386
RNA9	BP	GO:0045577	regulation of B cell differentiation	0.02244	5.64386
RNA9	BP	GO:0002823	negative regulation of adaptive immune r...	0.02244	5.64386
RNA9	BP	GO:0009311	oligosaccharide metabolic process	0.02368	5.64386
RNA9	BP	GO:0051281	positive regulation of release of seques...	0.02491	5.05889
RNA9	BP	GO:0033628	regulation of cell adhesion mediated by ...	0.02614	5.05889
RNA9	BP	GO:0002707	negative regulation of lymphocyte mediat...	0.02614	5.05889
RNA9	BP	GO:0061005	cell differentiation involved in kidney ...	0.02737	5.05889
RNA9	BP	GO:0046329	negative regulation of JNK cascade	0.02737	5.05889
RNA9	BP	GO:0035335	peptidyl-tyrosine dephosphorylation	0.02737	5.05889
RNA9	BP	GO:1901021	positive regulation of calcium ion trans...	0.0286	5.05889
RNA9	BP	GO:0050853	B cell receptor signaling pathway	0.0286	5.05889
RNA9	BP	GO:0051279	regulation of release of sequestered cal...	0.02944	5.05889
RNA9	BP	GO:0070232	regulation of T cell apoptotic process	0.02982	5.05889
RNA9	BP	GO:0071604	transforming growth factor beta producti...	0.02982	5.05889
RNA9	BP	GO:0042267	natural killer cell mediated cytotoxicit...	0.03105	5.05889
RNA9	BP	GO:0006739	NADP metabolic process	0.03105	5.05889
RNA9	BP	GO:1904707	positive regulation of vascular smooth m...	0.03227	5.05889
RNA9	BP	GO:0043124	negative regulation of I-kappaB kinase/N...	0.03227	5.05889
RNA9	BP	GO:0002889	regulation of immunoglobulin mediated im...	0.03349	5.05889
RNA9	BP	GO:0030225	macrophage differentiation	0.03349	5.05889
RNA9	BP	GO:0070527	platelet aggregation	0.03349	5.05889
RNA9	BP	GO:0018208	peptidyl-proline modification	0.03593	4.64386
RNA9	BP	GO:0050850	positive regulation of calcium-mediated ...	0.03593	4.64386
RNA9	BP	GO:0006821	chloride transport	0.03837	4.64386
RNA9	BP	GO:0006911	phagocytosis, engulfment	0.03837	4.64386
RNA9	BP	GO:0042130	negative regulation of T cell proliferat...	0.03837	4.64386
RNA9	BP	GO:0061515	myeloid cell development	0.03943	5.05889
RNA9	BP	GO:0060612	adipose tissue development	0.04079	4.64386
RNA9	BP	GO:0032649	regulation of interferon-gamma productio...	0.04322	4.64386
RNA9	BP	GO:0050732	negative regulation of peptidyl-tyrosine...	0.04443	4.32193
RNA9	BP	GO:0050766	positive regulation of phagocytosis	0.04443	4.32193
RNA9	BP	GO:0006909	phagocytosis	0.04524	3.8365
RNA9	BP	GO:0014068	positive regulation of phosphatidylinosi...	0.04564	4.32193
RNA9	BP	GO:0010676	positive regulation of cellular carbohyd...	0.04564	4.32193
RNA9	BP	GO:2001259	positive regulation of cation channel ac...	0.04564	4.32193
RNA9	BP	GO:0006801	superoxide metabolic process	0.04684	4.32193
RNA9	BP	GO:0006487	protein N-linked glycosylation	0.04925	4.32193
RNA10	BP	GO:0071404	cellular response to low-density lipopro...	7.6e-05	5.05889
RNA10	BP	GO:0030593	neutrophil chemotaxis	0.00021	4.18442
RNA10	BP	GO:0007229	integrin-mediated signaling pathway	0.00026	3.68966
RNA10	BP	GO:0034113	heterotypic cell-cell adhesion	0.00037	4.42146
RNA10	BP	GO:0031623	receptor internalization	0.00066	3.32193
RNA10	BP	GO:0006911	phagocytosis, engulfment	0.00071	4.05889
RNA10	BP	GO:0007159	leukocyte cell-cell adhesion	0.00103	2.60823
RNA10	BP	GO:0042119	neutrophil activation	0.0014	5.05889
RNA10	BP	GO:0050901	leukocyte tethering or rolling	0.0014	5.05889
RNA10	BP	GO:0006999	nuclear pore organization	0.00204	4.8365
RNA10	BP	GO:0046931	pore complex assembly	0.0024	4.8365
RNA10	BP	GO:0097242	amyloid-beta clearance	0.0024	4.8365
RNA10	BP	GO:0033574	response to testosterone	0.0024	4.8365
RNA10	BP	GO:0003084	positive regulation of systemic arterial...	0.0024	4.8365
RNA10	BP	GO:0030212	hyaluronan metabolic process	0.0028	4.64386
RNA10	BP	GO:0030574	collagen catabolic process	0.0028	4.64386
RNA10	BP	GO:0045321	leukocyte activation	0.00526	1.68966
RNA10	BP	GO:0050000	chromosome localization	0.00564	2.94342
RNA10	BP	GO:0002275	myeloid cell activation involved in immu...	0.00608	3.58496
RNA10	BP	GO:0045648	positive regulation of erythrocyte diffe...	0.00629	4.05889
RNA10	BP	GO:0009988	cell-cell recognition	0.00629	4.05889
RNA10	BP	GO:0010543	regulation of platelet activation	0.00689	3.94342
RNA10	BP	GO:0034314	Arp2/3 complex-mediated actin nucleation	0.00817	3.8365
RNA10	BP	GO:0046633	alpha-beta T cell proliferation	0.0112	4.47393
RNA10	BP	GO:0032613	interleukin-10 production	0.01121	4.18442
RNA10	BP	GO:0006081	cellular aldehyde metabolic process	0.01139	3.70526
RNA10	BP	GO:0045471	response to ethanol	0.01427	3.47393
RNA10	BP	GO:0097306	cellular response to alcohol	0.01693	3.32193
RNA10	BP	GO:0033627	cell adhesion mediated by integrin	0.01693	3.32193
RNA10	BP	GO:0006954	inflammatory response	0.01694	1.61706
RNA10	BP	GO:0050766	positive regulation of phagocytosis	0.01786	3.25154
RNA10	BP	GO:0001558	regulation of cell growth	0.01796	2.12029
RNA10	BP	GO:1901607	alpha-amino acid biosynthetic process	0.01882	3.25154
RNA10	BP	GO:0043302	positive regulation of leukocyte degranu...	0.02227	4.64386
RNA10	BP	GO:0045912	negative regulation of carbohydrate meta...	0.02231	3.55639
RNA10	BP	GO:0006898	receptor-mediated endocytosis	0.02272	2.98089
RNA10	BP	GO:0045766	positive regulation of angiogenesis	0.02481	2.25154
RNA10	BP	GO:0090307	mitotic spindle assembly	0.02606	3
RNA10	BP	GO:0099024	plasma membrane invagination	0.02671	4.25154
RNA10	BP	GO:0050672	negative regulation of lymphocyte prolif...	0.02783	3.25154
RNA10	BP	GO:0002821	positive regulation of adaptive immune r...	0.0279	2.59946
RNA10	BP	GO:0046390	ribose phosphate biosynthetic process	0.02822	1.152
RNA10	BP	GO:0070374	positive regulation of ERK1 and ERK2 cas...	0.02972	2.14136
RNA10	BP	GO:0000768	syncytium formation by plasma membrane f...	0.03329	3.47393
RNA10	BP	GO:0030865	cortical cytoskeleton organization	0.03331	3.18442
RNA10	BP	GO:0042310	vasoconstriction	0.03549	2.73697
RNA10	BP	GO:0015844	monoamine transport	0.03873	3.47393
RNA10	BP	GO:0001776	leukocyte homeostasis	0.03886	2.47393
RNA10	BP	GO:0062014	negative regulation of small molecule me...	0.03932	2.68966
RNA10	BP	GO:0009894	regulation of catabolic process	0.03966	0.251539
RNA10	BP	GO:0051897	positive regulation of protein kinase B ...	0.04063	2.64386
RNA10	BP	GO:1903036	positive regulation of response to wound...	0.04417	3.12029
RNA10	BP	GO:0002262	myeloid cell homeostasis	0.04703	2.81604
RNA10	BP	GO:0097305	response to alcohol	0.04774	3.2863
RNA10	BP	GO:0043547	positive regulation of GTPase activity	0.04898	1.87127
RNA10	BP	GO:0033032	regulation of myeloid cell apoptotic pro...	0.04944	4.18442
RNA11	BP	GO:0006607	NLS-bearing protein import into nucleus	2.2e-05	7.64386
RNA11	BP	GO:0046040	IMP metabolic process	0.0068	6.64386
RNA11	BP	GO:0042254	ribosome biogenesis	0.0086	3.73697
RNA11	BP	GO:1901836	regulation of transcription of nucleolar...	0.0089	6.64386
RNA11	BP	GO:0006335	DNA replication-dependent nucleosome ass...	0.0096	6.64386
RNA11	BP	GO:2000738	positive regulation of stem cell differe...	0.0103	6.64386
RNA11	BP	GO:0000413	protein peptidyl-prolyl isomerization	0.0116	6.64386
RNA11	BP	GO:0006541	glutamine metabolic process	0.0116	6.64386
RNA11	BP	GO:0006336	DNA replication-independent nucleosome a...	0.0116	6.64386
RNA11	BP	GO:0045943	positive regulation of transcription by ...	0.0143	6.64386
RNA11	BP	GO:0033137	negative regulation of peptidyl-serine p...	0.015	5.64386
RNA11	BP	GO:0006111	regulation of gluconeogenesis	0.0225	5.64386
RNA11	BP	GO:0018023	peptidyl-lysine trimethylation	0.0225	5.64386
RNA11	BP	GO:0000245	spliceosomal complex assembly	0.0231	5.64386
RNA11	BP	GO:0010676	positive regulation of cellular carbohyd...	0.0251	5.05889
RNA11	BP	GO:0046425	regulation of JAK-STAT cascade	0.0352	4.64386
RNA11	BP	GO:0034968	histone lysine methylation	0.0498	4.32193
RNA12	BP	GO:0070262	peptidyl-serine dephosphorylation	0.00012	6.64386
RNA12	BP	GO:0010998	regulation of translational initiation b...	0.00018	6.64386
RNA12	BP	GO:0032516	positive regulation of phosphoprotein ph...	0.00025	6.64386
RNA12	BP	GO:0042130	negative regulation of T cell proliferat...	0.00124	5.32193
RNA12	BP	GO:1903573	negative regulation of response to endop...	0.00168	5.05889
RNA12	BP	GO:1901224	positive regulation of NIK/NF-kappaB sig...	0.00207	4.8365
RNA12	BP	GO:0071347	cellular response to interleukin-1	0.00217	4.8365
RNA12	BP	GO:0045600	positive regulation of fat cell differen...	0.00239	4.8365
RNA12	BP	GO:0071230	cellular response to amino acid stimulus	0.00273	4.64386
RNA12	BP	GO:0035710	CD4-positive, alpha-beta T cell activati...	0.00299	5.42146
RNA12	BP	GO:0035137	hindlimb morphogenesis	0.00321	6.05889
RNA12	BP	GO:0009617	response to bacterium	0.00338	3.152
RNA12	BP	GO:0000122	negative regulation of transcription by ...	0.00635	2.52284
RNA12	BP	GO:0030182	neuron differentiation	0.00936	1.24013
RNA12	BP	GO:0043200	response to amino acid	0.01043	5.05889
RNA12	BP	GO:0009952	anterior/posterior pattern specification	0.01212	3.55639
RNA12	BP	GO:0043524	negative regulation of neuron apoptotic ...	0.0126	3.55639
RNA12	BP	GO:0042093	T-helper cell differentiation	0.01278	5.32193
RNA12	BP	GO:0031069	hair follicle morphogenesis	0.01705	5.64386
RNA12	BP	GO:0021692	cerebellar Purkinje cell layer morphogen...	0.01705	5.64386
RNA12	BP	GO:0006983	ER overload response	0.01705	5.64386
RNA12	BP	GO:2000482	regulation of interleukin-8 secretion	0.01705	5.64386
RNA12	BP	GO:0008356	asymmetric cell division	0.01705	5.64386
RNA12	BP	GO:0032633	interleukin-4 production	0.01705	5.64386
RNA12	BP	GO:0009072	aromatic amino acid family metabolic pro...	0.01705	5.64386
RNA12	BP	GO:0072539	T-helper 17 cell differentiation	0.01705	5.64386
RNA12	BP	GO:0034612	response to tumor necrosis factor	0.01767	3.64386
RNA12	BP	GO:0006825	copper ion transport	0.01873	5.64386
RNA12	BP	GO:2000628	regulation of miRNA metabolic process	0.01873	5.64386
RNA12	BP	GO:0042423	catecholamine biosynthetic process	0.01873	5.64386
RNA12	BP	GO:0031128	developmental induction	0.01873	5.64386
RNA12	BP	GO:1900402	regulation of carbohydrate metabolic pro...	0.01873	5.64386
RNA12	BP	GO:0032332	positive regulation of chondrocyte diffe...	0.02042	5.64386
RNA12	BP	GO:0045623	negative regulation of T-helper cell dif...	0.02042	5.64386
RNA12	BP	GO:0010155	regulation of proton transport	0.02042	5.64386
RNA12	BP	GO:0097201	negative regulation of transcription fro...	0.02042	5.64386
RNA12	BP	GO:0034497	protein localization to phagophore assem...	0.02042	5.64386
RNA12	BP	GO:0021533	cell differentiation in hindbrain	0.02042	5.64386
RNA12	BP	GO:0045793	positive regulation of cell size	0.02042	5.64386
RNA12	BP	GO:0036120	cellular response to platelet-derived gr...	0.02042	5.64386
RNA12	BP	GO:0050869	negative regulation of B cell activation	0.02211	5.64386
RNA12	BP	GO:0048535	lymph node development	0.02211	5.64386
RNA12	BP	GO:0072574	hepatocyte proliferation	0.02211	5.64386
RNA12	BP	GO:0045778	positive regulation of ossification	0.02232	4.32193
RNA12	BP	GO:1904754	positive regulation of vascular associat...	0.02379	5.64386
RNA12	BP	GO:0006878	cellular copper ion homeostasis	0.02379	5.64386
RNA12	BP	GO:0046688	response to copper ion	0.02379	5.64386
RNA12	BP	GO:0046006	regulation of activated T cell prolifera...	0.02379	5.64386
RNA12	BP	GO:0002089	lens morphogenesis in camera-type eye	0.02379	5.64386
RNA12	BP	GO:0035136	forelimb morphogenesis	0.02379	5.64386
RNA12	BP	GO:0019430	removal of superoxide radicals	0.02379	5.64386
RNA12	BP	GO:0061158	3'-UTR-mediated mRNA destabilization	0.02379	5.64386
RNA12	BP	GO:0035116	embryonic hindlimb morphogenesis	0.02547	5.05889
RNA12	BP	GO:0048596	embryonic camera-type eye morphogenesis	0.02547	5.05889
RNA12	BP	GO:0021884	forebrain neuron development	0.02547	5.05889
RNA12	BP	GO:0006817	phosphate ion transport	0.02547	5.05889
RNA12	BP	GO:0006468	protein phosphorylation	0.02672	1.51457
RNA12	BP	GO:0085029	extracellular matrix assembly	0.02714	5.05889
RNA12	BP	GO:0036230	granulocyte activation	0.02714	5.05889
RNA12	BP	GO:0032515	negative regulation of phosphoprotein ph...	0.02714	5.05889
RNA12	BP	GO:0033962	cytoplasmic mRNA processing body assembl...	0.02714	5.05889
RNA12	BP	GO:0021697	cerebellar cortex formation	0.02714	5.05889
RNA12	BP	GO:0044273	sulfur compound catabolic process	0.02714	5.05889
RNA12	BP	GO:0006576	cellular biogenic amine metabolic proces...	0.02881	5.05889
RNA12	BP	GO:0000413	protein peptidyl-prolyl isomerization	0.02881	5.05889
RNA12	BP	GO:0031100	animal organ regeneration	0.02881	5.05889
RNA12	BP	GO:0010866	regulation of triglyceride biosynthetic ...	0.02881	5.05889
RNA12	BP	GO:0010803	regulation of tumor necrosis factor-medi...	0.02881	5.05889
RNA12	BP	GO:0043153	entrainment of circadian clock by photop...	0.02881	5.05889
RNA12	BP	GO:0002823	negative regulation of adaptive immune r...	0.03049	5.05889
RNA12	BP	GO:0034142	toll-like receptor 4 signaling pathway	0.03049	5.05889
RNA12	BP	GO:0042417	dopamine metabolic process	0.03049	5.05889
RNA12	BP	GO:0010592	positive regulation of lamellipodium ass...	0.03049	5.05889
RNA12	BP	GO:0003407	neural retina development	0.03215	5.05889
RNA12	BP	GO:0009069	serine family amino acid metabolic proce...	0.03215	5.05889
RNA12	BP	GO:0046638	positive regulation of alpha-beta T cell...	0.03215	5.05889
RNA12	BP	GO:0043276	anoikis	0.03382	5.05889
RNA12	BP	GO:0007595	lactation	0.03382	5.05889
RNA12	BP	GO:0036003	positive regulation of transcription fro...	0.03382	5.05889
RNA12	BP	GO:0033598	mammary gland epithelial cell proliferat...	0.03382	5.05889
RNA12	BP	GO:0002082	regulation of oxidative phosphorylation	0.03548	4.64386
RNA12	BP	GO:0070169	positive regulation of biomineral tissue...	0.03548	4.64386
RNA12	BP	GO:0050856	regulation of T cell receptor signaling ...	0.03548	4.64386
RNA12	BP	GO:0098780	response to mitochondrial depolarisation	0.03548	4.64386
RNA12	BP	GO:0000423	mitophagy	0.03548	4.64386
RNA12	BP	GO:0045943	positive regulation of transcription by ...	0.03548	4.64386
RNA12	BP	GO:0060042	retina morphogenesis in camera-type eye	0.03714	4.64386
RNA12	BP	GO:0000096	sulfur amino acid metabolic process	0.0388	4.64386
RNA12	BP	GO:0001782	B cell homeostasis	0.0388	4.64386
RNA12	BP	GO:0032729	positive regulation of interferon-gamma ...	0.0388	4.64386
RNA12	BP	GO:0006826	iron ion transport	0.04045	4.64386
RNA12	BP	GO:0032757	positive regulation of interleukin-8 pro...	0.04045	4.64386
RNA12	BP	GO:0051353	positive regulation of oxidoreductase ac...	0.0421	4.64386
RNA12	BP	GO:0048536	spleen development	0.0421	4.64386
RNA12	BP	GO:0009880	embryonic pattern specification	0.0421	4.64386
RNA12	BP	GO:0051055	negative regulation of lipid biosyntheti...	0.0421	4.64386
RNA12	BP	GO:0010677	negative regulation of cellular carbohyd...	0.04375	4.64386
RNA12	BP	GO:0043029	T cell homeostasis	0.04375	4.64386
RNA12	BP	GO:1905898	positive regulation of response to endop...	0.04375	4.64386
RNA12	BP	GO:0051216	cartilage development	0.04591	3.47393
RNA12	BP	GO:0006805	xenobiotic metabolic process	0.04704	4.32193
RNA12	BP	GO:0030888	regulation of B cell proliferation	0.04704	4.32193
RNA12	BP	GO:0046854	phosphatidylinositol phosphorylation	0.04869	4.32193
RNA13	BP	GO:0006099	tricarboxylic acid cycle	0.00065	5.64386
RNA13	BP	GO:0006105	succinate metabolic process	0.01479	6.64386
RNA13	BP	GO:0045876	positive regulation of sister chromatid ...	0.01479	6.64386
RNA13	BP	GO:0034088	maintenance of mitotic sister chromatid ...	0.01479	6.64386
RNA13	BP	GO:0062033	positive regulation of mitotic sister ch...	0.02065	5.64386
RNA13	BP	GO:2000781	positive regulation of double-strand bre...	0.02211	5.64386
RNA13	BP	GO:0009065	glutamine family amino acid catabolic pr...	0.02211	5.64386
RNA13	BP	GO:0009404	toxin metabolic process	0.02356	5.64386
RNA13	BP	GO:0006103	2-oxoglutarate metabolic process	0.02356	5.64386
RNA13	BP	GO:0046483	heterocycle metabolic process	0.02389	0.673134
RNA13	BP	GO:0006536	glutamate metabolic process	0.02647	5.05889
RNA13	BP	GO:0060255	regulation of macromolecule metabolic pr...	0.02928	0.168123
RNA13	BP	GO:0046856	phosphatidylinositol dephosphorylation	0.03082	5.05889
RNA13	BP	GO:0006734	NADH metabolic process	0.03227	5.05889
RNA13	BP	GO:0070129	regulation of mitochondrial translation	0.03227	5.05889
RNA13	BP	GO:0045668	negative regulation of osteoblast differ...	0.0409	4.64386
RNA13	BP	GO:0000959	mitochondrial RNA metabolic process	0.04661	4.32193
RNA14	BP	GO:0055114	oxidation-reduction process	5.7e-06	2.71425
RNA14	BP	GO:0006086	acetyl-CoA biosynthetic process from pyr...	1.7e-05	5.90689
RNA14	BP	GO:0032981	mitochondrial respiratory chain complex ...	5.8e-05	4.18442
RNA14	BP	GO:0006744	ubiquinone biosynthetic process	6.3e-05	5.22882
RNA14	BP	GO:0022900	electron transport chain	0.00022	4.47393
RNA14	BP	GO:0006099	tricarboxylic acid cycle	0.00035	4.42146
RNA14	BP	GO:0006122	mitochondrial electron transport, ubiqui...	0.00124	5.32193
RNA14	BP	GO:0009215	purine deoxyribonucleoside triphosphate ...	0.00124	5.32193
RNA14	BP	GO:0009151	purine deoxyribonucleotide metabolic pro...	0.00151	5.05889
RNA14	BP	GO:0042407	cristae formation	0.00213	4.8365
RNA14	BP	GO:0042775	mitochondrial ATP synthesis coupled elec...	0.00323	4.38082
RNA14	BP	GO:0001523	retinoid metabolic process	0.00324	4.47393
RNA14	BP	GO:0003016	respiratory system process	0.00457	4.32193
RNA14	BP	GO:0009145	purine nucleoside triphosphate biosynthe...	0.00509	3.12029
RNA14	BP	GO:0046496	nicotinamide nucleotide metabolic proces...	0.00544	2.91594
RNA14	BP	GO:0034308	primary alcohol metabolic process	0.00979	3.73697
RNA14	BP	GO:0055010	ventricular cardiac muscle tissue morpho...	0.01505	3.39593
RNA14	BP	GO:0016310	phosphorylation	0.02325	0.567041
RNA14	BP	GO:1990748	cellular detoxification	0.0261	4.18442
RNA14	BP	GO:0006626	protein targeting to mitochondrion	0.03395	2.78588
RNA14	BP	GO:0006164	purine nucleotide biosynthetic process	0.03755	3.09366
RNA14	BP	GO:0006754	ATP biosynthetic process	0.04975	2.76939
RNA15	BP	GO:0032543	mitochondrial translation	1.8e-07	2.75309
RNA15	BP	GO:0015986	ATP synthesis coupled proton transport	9.1e-07	3.98089
RNA15	BP	GO:0022904	respiratory electron transport chain	1.9e-06	3.18442
RNA15	BP	GO:0006120	mitochondrial electron transport, NADH t...	6.5e-05	3.44222
RNA15	BP	GO:0045333	cellular respiration	0.00016	2.7794
RNA15	BP	GO:0006412	translation	0.00042	1.17312
RNA15	BP	GO:0032981	mitochondrial respiratory chain complex ...	0.00065	2.47393
RNA15	BP	GO:0045822	negative regulation of heart contraction	0.00073	3.21759
RNA15	BP	GO:0014823	response to activity	0.00094	3.12029
RNA15	BP	GO:0009060	aerobic respiration	0.0011	2.21281
RNA15	BP	GO:0009124	nucleoside monophosphate biosynthetic pr...	0.00196	2.37582
RNA15	BP	GO:0050801	ion homeostasis	0.002	0.910502
RNA15	BP	GO:0010882	regulation of cardiac muscle contraction...	0.00203	3.47393
RNA15	BP	GO:0055119	relaxation of cardiac muscle	0.00273	3.32193
RNA15	BP	GO:0031115	negative regulation of microtubule polym...	0.00273	3.32193
RNA15	BP	GO:0071902	positive regulation of protein serine/th...	0.00298	0.905764
RNA15	BP	GO:0001976	neurological system process involved in ...	0.00357	3.22882
RNA15	BP	GO:0006883	cellular sodium ion homeostasis	0.00357	3.22882
RNA15	BP	GO:1990542	mitochondrial transmembrane transport	0.00364	2.29134
RNA15	BP	GO:0022406	membrane docking	0.0069	1.00965
RNA15	BP	GO:0045948	positive regulation of translational ini...	0.00696	2.87127
RNA15	BP	GO:0006103	2-oxoglutarate metabolic process	0.0084	2.80255
RNA15	BP	GO:0046321	positive regulation of fatty acid oxidat...	0.0084	2.80255
RNA15	BP	GO:0042775	mitochondrial ATP synthesis coupled elec...	0.0094	2.91896
RNA15	BP	GO:0033173	calcineurin-NFAT signaling cascade	0.01013	1.65896
RNA15	BP	GO:0072593	reactive oxygen species metabolic proces...	0.01014	0.36154
RNA15	BP	GO:0086004	regulation of cardiac muscle cell contra...	0.0103	2.21759
RNA15	BP	GO:0042311	vasodilation	0.01176	2.61411
RNA15	BP	GO:0006767	water-soluble vitamin metabolic process	0.01176	2.61411
RNA15	BP	GO:0006470	protein dephosphorylation	0.0123	1.27674
RNA15	BP	GO:0043268	positive regulation of potassium ion tra...	0.01369	2.53952
RNA15	BP	GO:0006749	glutathione metabolic process	0.01409	2.074
RNA15	BP	GO:0032482	Rab protein signal transduction	0.01705	2
RNA15	BP	GO:0000027	ribosomal large subunit assembly	0.01807	2.39593
RNA15	BP	GO:0042752	regulation of circadian rhythm	0.02113	1.6529
RNA15	BP	GO:0051291	protein heterooligomerization	0.02225	1.33227
RNA15	BP	GO:0009394	2'-deoxyribonucleotide metabolic process	0.02295	2.47393
RNA15	BP	GO:0006612	protein targeting to membrane	0.02589	1.53116
RNA15	BP	GO:0009991	response to extracellular stimulus	0.02662	0.810966
RNA15	BP	GO:0033014	tetrapyrrole biosynthetic process	0.02697	1.55639
RNA15	BP	GO:0006071	glycerol metabolic process	0.02834	2.88897
RNA15	BP	GO:0051131	chaperone-mediated protein complex assem...	0.02834	2.88897
RNA15	BP	GO:0009086	methionine biosynthetic process	0.02834	2.88897
RNA15	BP	GO:0010894	negative regulation of steroid biosynthe...	0.02834	2.88897
RNA15	BP	GO:0006086	acetyl-CoA biosynthetic process from pyr...	0.02834	2.88897
RNA15	BP	GO:0061052	negative regulation of cell growth invol...	0.02834	2.88897
RNA15	BP	GO:1903789	regulation of amino acid transmembrane t...	0.02834	2.88897
RNA15	BP	GO:0003341	cilium movement	0.02834	2.88897
RNA15	BP	GO:0046886	positive regulation of hormone biosynthe...	0.02834	2.88897
RNA15	BP	GO:0006984	ER-nucleus signaling pathway	0.03201	2.09954
RNA15	BP	GO:0061049	cell growth involved in cardiac muscle c...	0.03367	2.074
RNA15	BP	GO:0001845	phagolysosome assembly	0.03403	2.73697
RNA15	BP	GO:0006825	copper ion transport	0.03403	2.73697
RNA15	BP	GO:0009110	vitamin biosynthetic process	0.03403	2.73697
RNA15	BP	GO:0009263	deoxyribonucleotide biosynthetic process	0.03403	2.73697
RNA15	BP	GO:0060401	cytosolic calcium ion transport	0.03404	0.767339
RNA15	BP	GO:0018105	peptidyl-serine phosphorylation	0.03647	0.724993
RNA15	BP	GO:0007286	spermatid development	0.03741	1.65517
RNA15	BP	GO:0030032	lamellipodium assembly	0.03866	1.45403
RNA15	BP	GO:0031667	response to nutrient levels	0.03944	0.79419
RNA15	BP	GO:0042304	regulation of fatty acid biosynthetic pr...	0.03992	2.14136
RNA15	BP	GO:0070935	3'-UTR-mediated mRNA stabilization	0.04012	2.64386
RNA15	BP	GO:0055089	fatty acid homeostasis	0.04012	2.64386
RNA15	BP	GO:0035813	regulation of renal sodium excretion	0.04012	2.64386
RNA15	BP	GO:0006107	oxaloacetate metabolic process	0.04012	2.64386
RNA15	BP	GO:0051953	negative regulation of amine transport	0.04012	2.64386
RNA15	BP	GO:0051957	positive regulation of amino acid transp...	0.04012	2.64386
RNA15	BP	GO:0051353	positive regulation of oxidoreductase ac...	0.04635	2.14136
RNA15	BP	GO:0030850	prostate gland development	0.04639	1.88897
RNA15	BP	GO:0016042	lipid catabolic process	0.04642	0.511142
RNA15	BP	GO:2001241	positive regulation of extrinsic apoptot...	0.04659	2.51457
RNA15	BP	GO:0032094	response to food	0.04659	2.51457
RNA15	BP	GO:0006851	mitochondrial calcium ion transmembrane ...	0.04659	2.51457
RNA15	BP	GO:0032891	negative regulation of organic acid tran...	0.04659	2.51457
RNA15	BP	GO:0003084	positive regulation of systemic arterial...	0.04659	2.51457
RNA15	BP	GO:0010893	positive regulation of steroid biosynthe...	0.04659	2.51457
RNA15	BP	GO:0045742	positive regulation of epidermal growth ...	0.04659	2.51457
RNA15	BP	GO:1903779	regulation of cardiac conduction	0.04659	2.51457
RNA15	BP	GO:0010863	positive regulation of phospholipase C a...	0.04659	2.51457
RNA15	BP	GO:1904018	positive regulation of vasculature devel...	0.0473	-0.146221
RNA16	BP	GO:0045944	positive regulation of transcription by ...	4.8e-05	2.49185
RNA16	BP	GO:0043403	skeletal muscle tissue regeneration	0.001	5.32193
RNA16	BP	GO:0045648	positive regulation of erythrocyte diffe...	0.0011	5.32193
RNA16	BP	GO:0071526	semaphorin-plexin signaling pathway	0.0017	5.05889
RNA16	BP	GO:0071260	cellular response to mechanical stimulus	0.002	4.8365
RNA16	BP	GO:0021766	hippocampus development	0.0021	4.8365
RNA16	BP	GO:0008284	positive regulation of cell proliferatio...	0.0038	2.55639
RNA16	BP	GO:0043388	positive regulation of DNA binding	0.0045	4.32193
RNA16	BP	GO:0046777	protein autophosphorylation	0.0059	3.01937
RNA16	BP	GO:0018022	peptidyl-lysine methylation	0.0115	3.39593
RNA16	BP	GO:0010556	regulation of macromolecule biosynthetic...	0.0131	1.51141
RNA16	BP	GO:0090090	negative regulation of canonical Wnt sig...	0.0134	3.47393
RNA16	BP	GO:0038066	p38MAPK cascade	0.0137	4.47393
RNA16	BP	GO:0007178	transmembrane receptor protein serine/th...	0.014	2.05889
RNA16	BP	GO:0032092	positive regulation of protein binding	0.0152	3.39593
RNA16	BP	GO:0018105	peptidyl-serine phosphorylation	0.0184	2.80255
RNA16	BP	GO:0031326	regulation of cellular biosynthetic proc...	0.0223	1.45555
RNA16	BP	GO:0003231	cardiac ventricle development	0.0236	3.05889
RNA16	BP	GO:0042772	DNA damage response, signal transduction...	0.0238	5.64386
RNA16	BP	GO:1901741	positive regulation of myoblast fusion	0.0238	5.64386
RNA16	BP	GO:0045653	negative regulation of megakaryocyte dif...	0.0238	5.64386
RNA16	BP	GO:0099159	regulation of modification of postsynapt...	0.0238	5.64386
RNA16	BP	GO:0090335	regulation of brown fat cell differentia...	0.0238	5.64386
RNA16	BP	GO:0032495	response to muramyl dipeptide	0.0238	5.64386
RNA16	BP	GO:0098885	modification of postsynaptic actin cytos...	0.0238	5.64386
RNA16	BP	GO:0006983	ER overload response	0.0238	5.64386
RNA16	BP	GO:0042541	hemoglobin biosynthetic process	0.0238	5.64386
RNA16	BP	GO:0010918	positive regulation of mitochondrial mem...	0.0238	5.64386
RNA16	BP	GO:0086016	AV node cell action potential	0.0238	5.64386
RNA16	BP	GO:0035729	cellular response to hepatocyte growth f...	0.0238	5.64386
RNA16	BP	GO:0018216	peptidyl-arginine methylation	0.0238	5.64386
RNA16	BP	GO:0051451	myoblast migration	0.0238	5.64386
RNA16	BP	GO:0007520	myoblast fusion	0.0249	5.32193
RNA16	BP	GO:0031128	developmental induction	0.0261	5.05889
RNA16	BP	GO:1901028	regulation of mitochondrial outer membra...	0.0261	5.05889
RNA16	BP	GO:0050774	negative regulation of dendrite morphoge...	0.0261	5.05889
RNA16	BP	GO:1905048	regulation of metallopeptidase activity	0.0261	5.05889
RNA16	BP	GO:0086069	bundle of His cell to Purkinje myocyte c...	0.0285	5.05889
RNA16	BP	GO:0086014	atrial cardiac muscle cell action potent...	0.0285	5.05889
RNA16	BP	GO:0099560	synaptic membrane adhesion	0.0285	5.05889
RNA16	BP	GO:0070885	negative regulation of calcineurin-NFAT ...	0.0285	5.05889
RNA16	BP	GO:0000122	negative regulation of transcription by ...	0.0299	1.72499
RNA16	BP	GO:0035372	protein localization to microtubule	0.0308	5.05889
RNA16	BP	GO:0019228	neuronal action potential	0.0308	5.05889
RNA16	BP	GO:2000136	regulation of cell proliferation involve...	0.0308	5.05889
RNA16	BP	GO:0010759	positive regulation of macrophage chemot...	0.0308	5.05889
RNA16	BP	GO:2000463	positive regulation of excitatory postsy...	0.0308	5.05889
RNA16	BP	GO:0086012	membrane depolarization during cardiac m...	0.0308	5.05889
RNA16	BP	GO:0071542	dopaminergic neuron differentiation	0.0308	5.05889
RNA16	BP	GO:0030162	regulation of proteolysis	0.0319	2.074
RNA16	BP	GO:0051497	negative regulation of stress fiber asse...	0.0332	5.05889
RNA16	BP	GO:1903429	regulation of cell maturation	0.0332	5.05889
RNA16	BP	GO:0098696	regulation of neurotransmitter receptor ...	0.0332	5.05889
RNA16	BP	GO:0002089	lens morphogenesis in camera-type eye	0.0332	5.05889
RNA16	BP	GO:0032735	positive regulation of interleukin-12 pr...	0.0332	5.05889
RNA16	BP	GO:0006349	regulation of gene expression by genetic...	0.0332	5.05889
RNA16	BP	GO:0031167	rRNA methylation	0.0332	5.05889
RNA16	BP	GO:0031279	regulation of cyclase activity	0.0332	5.05889
RNA16	BP	GO:0030330	DNA damage response, signal transduction...	0.0339	4.32193
RNA16	BP	GO:0010656	negative regulation of muscle cell apopt...	0.0339	4.32193
RNA16	BP	GO:0042770	signal transduction in response to DNA d...	0.0344	4.42146
RNA16	BP	GO:0060284	regulation of cell development	0.0344	1.08927
RNA16	BP	GO:0044030	regulation of DNA methylation	0.0355	4.64386
RNA16	BP	GO:0060074	synapse maturation	0.0355	4.64386
RNA16	BP	GO:0010460	positive regulation of heart rate	0.0355	4.64386
RNA16	BP	GO:0048596	embryonic camera-type eye morphogenesis	0.0355	4.64386
RNA16	BP	GO:0080182	histone H3-K4 trimethylation	0.0355	4.64386
RNA16	BP	GO:0051354	negative regulation of oxidoreductase ac...	0.0355	4.64386
RNA16	BP	GO:2000738	positive regulation of stem cell differe...	0.0355	4.64386
RNA16	BP	GO:0048643	positive regulation of skeletal muscle t...	0.0378	4.64386
RNA16	BP	GO:0060716	labyrinthine layer blood vessel developm...	0.0378	4.64386
RNA16	BP	GO:0046827	positive regulation of protein export fr...	0.0378	4.64386
RNA16	BP	GO:0010971	positive regulation of G2/M transition o...	0.0378	4.64386
RNA16	BP	GO:0060045	positive regulation of cardiac muscle ce...	0.0378	4.64386
RNA16	BP	GO:0048843	negative regulation of axon extension in...	0.0378	4.64386
RNA16	BP	GO:1904646	cellular response to amyloid-beta	0.0401	4.64386
RNA16	BP	GO:1900027	regulation of ruffle assembly	0.0401	4.64386
RNA16	BP	GO:0045663	positive regulation of myoblast differen...	0.0401	4.64386
RNA16	BP	GO:0050434	positive regulation of viral transcripti...	0.0401	4.64386
RNA16	BP	GO:1901984	negative regulation of protein acetylati...	0.0401	4.64386
RNA16	BP	GO:0010800	positive regulation of peptidyl-threonin...	0.0401	4.64386
RNA16	BP	GO:0060307	regulation of ventricular cardiac muscle...	0.0401	4.64386
RNA16	BP	GO:0001832	blastocyst growth	0.0401	4.64386
RNA16	BP	GO:0016571	histone methylation	0.0408	3.18442
RNA16	BP	GO:0050999	regulation of nitric-oxide synthase acti...	0.0424	4.64386
RNA16	BP	GO:0043502	regulation of muscle adaptation	0.043	3.39593
RNA16	BP	GO:0034391	regulation of smooth muscle cell apoptot...	0.0447	4.32193
RNA16	BP	GO:0003407	neural retina development	0.0447	4.32193
RNA16	BP	GO:0035994	response to muscle stretch	0.0447	4.32193
RNA16	BP	GO:0010830	regulation of myotube differentiation	0.045	4.32193
RNA16	BP	GO:0032968	positive regulation of transcription elo...	0.047	4.32193
RNA16	BP	GO:1900745	positive regulation of p38MAPK cascade	0.047	4.32193
RNA16	BP	GO:1900015	regulation of cytokine production involv...	0.0493	4.32193
RNA16	BP	GO:0014898	cardiac muscle hypertrophy in response t...	0.0493	4.32193
RNA17	BP	GO:1904816	positive regulation of protein localizat...	3.2e-05	4.32193
RNA17	BP	GO:0050821	protein stabilization	0.00012	2.08927
RNA17	BP	GO:0032968	positive regulation of transcription elo...	0.00041	3.47393
RNA17	BP	GO:0006275	regulation of DNA replication	0.00044	2.25154
RNA17	BP	GO:0070200	establishment of protein localization to...	0.00065	4.05889
RNA17	BP	GO:0000055	ribosomal large subunit export from nucl...	0.00065	4.05889
RNA17	BP	GO:0017148	negative regulation of translation	0.00077	2.226
RNA17	BP	GO:1904951	positive regulation of establishment of ...	0.00085	1.01937
RNA17	BP	GO:0045898	regulation of RNA polymerase II transcri...	0.00088	3.90689
RNA17	BP	GO:0071157	negative regulation of cell cycle arrest	0.00115	3.76939
RNA17	BP	GO:0007339	binding of sperm to zona pellucida	0.00115	3.76939
RNA17	BP	GO:1901998	toxin transport	0.00116	3.08927
RNA17	BP	GO:0090110	cargo loading into COPII-coated vesicle	0.00186	3.58496
RNA17	BP	GO:0010043	response to zinc ion	0.00186	3.58496
RNA17	BP	GO:0046688	response to copper ion	0.00186	3.58496
RNA17	BP	GO:0006364	rRNA processing	0.0032	1.8625
RNA17	BP	GO:0042026	protein refolding	0.00395	3.18442
RNA17	BP	GO:0071353	cellular response to interleukin-4	0.00537	3.05889
RNA17	BP	GO:2001244	positive regulation of intrinsic apoptot...	0.00634	2.41504
RNA17	BP	GO:0061053	somite development	0.00649	1.78588
RNA17	BP	GO:0071216	cellular response to biotic stimulus	0.00651	0.862496
RNA17	BP	GO:0032212	positive regulation of telomere maintena...	0.00802	2.8365
RNA17	BP	GO:0007064	mitotic sister chromatid cohesion	0.00849	3.18442
RNA17	BP	GO:0001678	cellular glucose homeostasis	0.0085	1.44418
RNA17	BP	GO:0071108	protein K48-linked deubiquitination	0.00904	2.76939
RNA17	BP	GO:0007030	Golgi organization	0.00967	1.72102
RNA17	BP	GO:0006888	ER to Golgi vesicle-mediated transport	0.01065	2.20645
RNA17	BP	GO:0051131	chaperone-mediated protein complex assem...	0.01346	3.47393
RNA17	BP	GO:0060396	growth hormone receptor signaling pathwa...	0.01346	3.47393
RNA17	BP	GO:0045876	positive regulation of sister chromatid ...	0.01346	3.47393
RNA17	BP	GO:0048532	anatomical structure arrangement	0.01346	3.47393
RNA17	BP	GO:0048208	COPII vesicle coating	0.01346	3.47393
RNA17	BP	GO:0006511	ubiquitin-dependent protein catabolic pr...	0.01384	1.28435
RNA17	BP	GO:0030433	ubiquitin-dependent ERAD pathway	0.01549	2.05889
RNA17	BP	GO:0006465	signal peptide processing	0.01625	3.32193
RNA17	BP	GO:1902165	regulation of intrinsic apoptotic signal...	0.01625	3.32193
RNA17	BP	GO:1904181	positive regulation of membrane depolari...	0.01625	3.32193
RNA17	BP	GO:0071236	cellular response to antibiotic	0.01649	1.64386
RNA17	BP	GO:0006403	RNA localization	0.01774	2.14329
RNA17	BP	GO:1904814	regulation of protein localization to ch...	0.01776	4.50635
RNA17	BP	GO:0006458	'de novo' protein folding	0.01802	2.61411
RNA17	BP	GO:1902883	negative regulation of response to oxida...	0.01816	1.53533
RNA17	BP	GO:0070302	regulation of stress-activated protein k...	0.01837	-0.316146
RNA17	BP	GO:0000060	protein import into nucleus, translocati...	0.01912	2.44746
RNA17	BP	GO:2001170	negative regulation of ATP biosynthetic ...	0.01927	3.18442
RNA17	BP	GO:0010172	embryonic body morphogenesis	0.01927	3.18442
RNA17	BP	GO:0030866	cortical actin cytoskeleton organization	0.01994	2.37084
RNA17	BP	GO:0010950	positive regulation of endopeptidase act...	0.02209	1.58208
RNA17	BP	GO:0042220	response to cocaine	0.02251	3.05889
RNA17	BP	GO:0018279	protein N-linked glycosylation via aspar...	0.02251	3.05889
RNA17	BP	GO:0046931	pore complex assembly	0.02251	3.05889
RNA17	BP	GO:0006882	cellular zinc ion homeostasis	0.02251	3.05889
RNA17	BP	GO:2000010	positive regulation of protein localizat...	0.02251	3.05889
RNA17	BP	GO:0090085	regulation of protein deubiquitination	0.02251	3.05889
RNA17	BP	GO:1901836	regulation of transcription of nucleolar...	0.02251	3.05889
RNA17	BP	GO:0006457	protein folding	0.02395	2.12728
RNA17	BP	GO:0071396	cellular response to lipid	0.02458	0.856679
RNA17	BP	GO:0010824	regulation of centrosome duplication	0.02571	2.67423
RNA17	BP	GO:0062033	positive regulation of mitotic sister ch...	0.02595	3
RNA17	BP	GO:0031167	rRNA methylation	0.02595	3
RNA17	BP	GO:0032211	negative regulation of telomere maintena...	0.02595	3
RNA17	BP	GO:0042755	eating behavior	0.02595	3
RNA17	BP	GO:0007263	nitric oxide mediated signal transductio...	0.02595	3
RNA17	BP	GO:0060261	positive regulation of transcription ini...	0.02595	3
RNA17	BP	GO:0010948	negative regulation of cell cycle proces...	0.0282	1.82368
RNA17	BP	GO:0042176	regulation of protein catabolic process	0.02914	0.672313
RNA17	BP	GO:0006406	mRNA export from nucleus	0.02925	2.16273
RNA17	BP	GO:0070734	histone H3-K27 methylation	0.02959	2.88897
RNA17	BP	GO:0031061	negative regulation of histone methylati...	0.02959	2.88897
RNA17	BP	GO:0051900	regulation of mitochondrial depolarizati...	0.02959	2.88897
RNA17	BP	GO:0043968	histone H2A acetylation	0.02959	2.88897
RNA17	BP	GO:0048339	paraxial mesoderm development	0.02959	2.88897
RNA17	BP	GO:0044030	regulation of DNA methylation	0.02959	2.88897
RNA17	BP	GO:0006611	protein export from nucleus	0.03089	2.54793
RNA17	BP	GO:1903322	positive regulation of protein modificat...	0.0328	1.54793
RNA17	BP	GO:0046825	regulation of protein export from nucleu...	0.03314	2.37084
RNA17	BP	GO:1901673	regulation of mitotic spindle assembly	0.03342	2.78588
RNA17	BP	GO:0008340	determination of adult lifespan	0.03342	2.78588
RNA17	BP	GO:0042789	mRNA transcription by RNA polymerase II	0.03342	2.78588
RNA17	BP	GO:1902003	regulation of amyloid-beta formation	0.03342	2.78588
RNA17	BP	GO:0002183	cytoplasmic translational initiation	0.03342	2.78588
RNA17	BP	GO:0043524	negative regulation of neuron apoptotic ...	0.03679	1.44222
RNA17	BP	GO:1904646	cellular response to amyloid-beta	0.03743	2.68966
RNA17	BP	GO:2000778	positive regulation of interleukin-6 sec...	0.03743	2.68966
RNA17	BP	GO:0071276	cellular response to cadmium ion	0.03743	2.68966
RNA17	BP	GO:0045616	regulation of keratinocyte differentiati...	0.03743	2.68966
RNA17	BP	GO:0060307	regulation of ventricular cardiac muscle...	0.03743	2.68966
RNA17	BP	GO:0061077	chaperone-mediated protein folding	0.04133	2.03899
RNA17	BP	GO:0051028	mRNA transport	0.0414	2.03899
RNA17	BP	GO:0035024	negative regulation of Rho protein signa...	0.04161	2.59946
RNA17	BP	GO:2000737	negative regulation of stem cell differe...	0.04161	2.59946
RNA17	BP	GO:0003009	skeletal muscle contraction	0.04161	2.59946
RNA17	BP	GO:0034605	cellular response to heat	0.04295	1.94342
RNA17	BP	GO:0034504	protein localization to nucleus	0.04426	1.60344
RNA17	BP	GO:0071479	cellular response to ionizing radiation	0.04515	2.35845
RNA17	BP	GO:0030534	adult behavior	0.04546	1.53533
RNA17	BP	GO:0007369	gastrulation	0.0455	1.152
RNA17	BP	GO:0070972	protein localization to endoplasmic reti...	0.0457	1.8365
RNA17	BP	GO:0045191	regulation of isotype switching	0.04596	2.51457
RNA17	BP	GO:0009069	serine family amino acid metabolic proce...	0.04596	2.51457
RNA17	BP	GO:0071407	cellular response to organic cyclic comp...	0.04877	0.977731
RNA1	MF	GO:0005201	extracellular matrix structural constitu...	2e-11	2.80591
RNA1	MF	GO:0005509	calcium ion binding	5.6e-09	1.81278
RNA1	MF	GO:0042605	peptide antigen binding	2.7e-08	4.20328
RNA1	MF	GO:0005518	collagen binding	4.3e-06	2.79141
RNA1	MF	GO:0008201	heparin binding	1.6e-05	2.2578
RNA1	MF	GO:0004867	serine-type endopeptidase inhibitor acti...	5.4e-05	3.07907
RNA1	MF	GO:0001968	fibronectin binding	8.8e-05	2.96203
RNA1	MF	GO:0043394	proteoglycan binding	0.00018	3.15843
RNA1	MF	GO:0051371	muscle alpha-actinin binding	0.0003	3.51457
RNA1	MF	GO:0004252	serine-type endopeptidase activity	0.00035	2.62891
RNA1	MF	GO:0017147	Wnt-protein binding	0.00047	2.87832
RNA1	MF	GO:0042288	MHC class I protein binding	0.00459	3.09954
RNA1	MF	GO:0005044	scavenger receptor activity	0.00495	2.49411
RNA1	MF	GO:0009975	cyclase activity	0.00584	2.98089
RNA1	MF	GO:0016849	phosphorus-oxygen lyase activity	0.00728	2.87127
RNA1	MF	GO:0038191	neuropilin binding	0.00728	2.87127
RNA1	MF	GO:0005245	voltage-gated calcium channel activity	0.0089	2.76939
RNA1	MF	GO:0008307	structural constituent of muscle	0.01496	2.5009
RNA1	MF	GO:0004180	carboxypeptidase activity	0.02001	2.34618
RNA1	MF	GO:0043236	laminin binding	0.02284	2.27462
RNA1	MF	GO:0050840	extracellular matrix binding	0.02527	2.24013
RNA1	MF	GO:0016248	channel inhibitor activity	0.02949	1.49411
RNA1	MF	GO:0015085	calcium ion transmembrane transporter ac...	0.03248	2.36375
RNA1	MF	GO:0030020	extracellular matrix structural constitu...	0.03259	2.07907
RNA1	MF	GO:0031994	insulin-like growth factor I binding	0.03343	2.73697
RNA1	MF	GO:0030169	low-density lipoprotein particle binding	0.03343	2.73697
RNA1	MF	GO:0015278	calcium-release channel activity	0.03343	2.73697
RNA1	MF	GO:0016504	peptidase activator activity	0.03625	2.01937
RNA1	MF	GO:0005178	integrin binding	0.0375	1.27462
RNA1	MF	GO:0035250	UDP-galactosyltransferase activity	0.04008	2.64386
RNA1	MF	GO:0030246	carbohydrate binding	0.04124	1.21759
RNA1	MF	GO:0019842	vitamin binding	0.04394	1.13924
RNA1	MF	GO:0005520	insulin-like growth factor binding	0.04661	2.62149
RNA1	MF	GO:0001848	complement binding	0.04717	2.51457
RNA2	MF	GO:0034185	apolipoprotein binding	0.011	6.64386
RNA2	MF	GO:0071813	lipoprotein particle binding	0.015	5.64386
RNA2	MF	GO:0016831	carboxy-lyase activity	0.023	5.64386
RNA2	MF	GO:0051059	NF-kappaB binding	0.026	5.05889
RNA2	MF	GO:0030170	pyridoxal phosphate binding	0.033	5.05889
RNA2	MF	GO:0060590	ATPase regulator activity	0.034	5.05889
RNA2	MF	GO:0048306	calcium-dependent protein binding	0.04	4.64386
RNA3	MF	GO:0017136	NAD-dependent histone deacetylase activi...	0.00031	4.42146
RNA3	MF	GO:0004715	non-membrane spanning protein tyrosine k...	0.00201	3.52838
RNA3	MF	GO:0008375	acetylglucosaminyltransferase activity	0.0026	3.42146
RNA3	MF	GO:0005096	GTPase activator activity	0.00286	1.88136
RNA3	MF	GO:0042826	histone deacetylase binding	0.0041	2.23786
RNA3	MF	GO:0015929	hexosaminidase activity	0.00569	4.05889
RNA3	MF	GO:1990939	ATP-dependent microtubule motor activity	0.00822	3.8365
RNA3	MF	GO:0070840	dynein complex binding	0.01278	3.55639
RNA3	MF	GO:0003714	transcription corepressor activity	0.01615	1.75633
RNA3	MF	GO:0047485	protein N-terminus binding	0.02222	1.90239
RNA3	MF	GO:0043014	alpha-tubulin binding	0.02228	3.12029
RNA3	MF	GO:0005524	ATP binding	0.02394	0.735552
RNA3	MF	GO:0004725	protein tyrosine phosphatase activity	0.02726	2.20645
RNA3	MF	GO:0001085	RNA polymerase II transcription factor b...	0.04149	1.62149
RNA3	MF	GO:0004879	nuclear receptor activity	0.04174	2.59946
RNA3	MF	GO:0017137	Rab GTPase binding	0.04264	1.59946
RNA3	MF	GO:0019213	deacetylase activity	0.04459	3.55639
RNA3	MF	GO:0019905	syntaxin binding	0.04659	2.64386
RNA3	MF	GO:0048487	beta-tubulin binding	0.04732	2.51457
RNA3	MF	GO:0008017	microtubule binding	0.04741	1.72738
RNA3	MF	GO:0044877	protein-containing complex binding	0.04903	0.677303
RNA4	MF	GO:0051015	actin filament binding	0.0027	2.76121
RNA4	MF	GO:0097472	cyclin-dependent protein kinase activity	0.0045	4.32193
RNA4	MF	GO:0030020	extracellular matrix structural constitu...	0.0054	4.18442
RNA4	MF	GO:0001968	fibronectin binding	0.0063	4.05889
RNA4	MF	GO:0030276	clathrin binding	0.0089	3.8365
RNA4	MF	GO:0005516	calmodulin binding	0.0111	2.67423
RNA4	MF	GO:0005524	ATP binding	0.0163	1.15557
RNA4	MF	GO:0046872	metal ion binding	0.02	0.846195
RNA4	MF	GO:0015291	secondary active transmembrane transport...	0.0256	3.47393
RNA4	MF	GO:0005201	extracellular matrix structural constitu...	0.0407	3.152
RNA4	MF	GO:0015085	calcium ion transmembrane transporter ac...	0.0443	3.25154
RNA4	MF	GO:0031994	insulin-like growth factor I binding	0.0452	4.32193
RNA4	MF	GO:0016641	oxidoreductase activity, acting on the C...	0.0452	4.32193
RNA4	MF	GO:0030898	actin-dependent ATPase activity	0.0452	4.32193
RNA4	MF	GO:0015108	chloride transmembrane transporter activ...	0.0485	4.05889
RNA4	MF	GO:0035173	histone kinase activity	0.0496	4.32193
RNA4	MF	GO:0000146	microfilament motor activity	0.0496	4.32193
RNA5	MF	GO:0042826	histone deacetylase binding	0.0011	5.32193
RNA5	MF	GO:0000983	transcription factor activity, RNA polym...	0.0086	6.64386
RNA5	MF	GO:0043425	bHLH transcription factor binding	0.0115	6.64386
RNA5	MF	GO:0003705	transcription factor activity, RNA polym...	0.0129	6.05889
RNA5	MF	GO:0046982	protein heterodimerization activity	0.0132	3.39593
RNA5	MF	GO:0001205	distal enhancer DNA-binding transcriptio...	0.0138	6.64386
RNA5	MF	GO:0003682	chromatin binding	0.0163	3.25154
RNA5	MF	GO:0070888	E-box binding	0.0172	5.64386
RNA5	MF	GO:0003690	double-stranded DNA binding	0.0185	3.42146
RNA5	MF	GO:0000980	RNA polymerase II distal enhancer sequen...	0.0285	5.05889
RNA5	MF	GO:0033613	activating transcription factor binding	0.0308	5.05889
RNA5	MF	GO:0043565	sequence-specific DNA binding	0.0396	3.22882
RNA6	MF	GO:0045296	cadherin binding	2.4e-05	5.64386
RNA6	MF	GO:0050998	nitric-oxide synthase binding	0.00068	5.64386
RNA6	MF	GO:0005201	extracellular matrix structural constitu...	0.00098	3.90689
RNA6	MF	GO:0008013	beta-catenin binding	0.00693	3.94342
RNA6	MF	GO:0044325	ion channel binding	0.01372	3.47393
RNA6	MF	GO:0043274	phospholipase binding	0.02058	5.64386
RNA6	MF	GO:0070411	I-SMAD binding	0.02058	5.64386
RNA6	MF	GO:0010181	FMN binding	0.02058	5.64386
RNA6	MF	GO:0004697	protein kinase C activity	0.02262	5.64386
RNA6	MF	GO:0016709	oxidoreductase activity, acting on paire...	0.02465	5.64386
RNA6	MF	GO:0097602	cullin family protein binding	0.02465	5.64386
RNA6	MF	GO:0030552	cAMP binding	0.02668	5.05889
RNA6	MF	GO:1990381	ubiquitin-specific protease binding	0.0287	5.05889
RNA6	MF	GO:0003785	actin monomer binding	0.03475	4.64386
RNA6	MF	GO:0031435	mitogen-activated protein kinase kinase ...	0.03676	4.64386
RNA6	MF	GO:0035255	ionotropic glutamate receptor binding	0.03876	4.64386
RNA6	MF	GO:0019901	protein kinase binding	0.0412	2.30757
RNA6	MF	GO:0031624	ubiquitin conjugating enzyme binding	0.04475	4.32193
RNA6	MF	GO:0097718	disordered domain specific binding	0.04674	4.32193
RNA7	MF	GO:0008528	G protein-coupled peptide receptor activ...	0.0024	4.8365
RNA7	MF	GO:0005201	extracellular matrix structural constitu...	0.004	3.22882
RNA7	MF	GO:0008083	growth factor activity	0.0129	3.55639
RNA7	MF	GO:0052689	carboxylic ester hydrolase activity	0.0203	3.18442
RNA7	MF	GO:0005506	iron ion binding	0.0221	3.12029
RNA7	MF	GO:0016298	lipase activity	0.0289	3.47393
RNA7	MF	GO:0005178	integrin binding	0.0318	2.8365
RNA7	MF	GO:0034450	ubiquitin-ubiquitin ligase activity	0.033	5.05889
RNA7	MF	GO:0015929	hexosaminidase activity	0.033	5.05889
RNA7	MF	GO:0016783	sulfurtransferase activity	0.0362	4.64386
RNA7	MF	GO:0031543	peptidyl-proline dioxygenase activity	0.0362	4.64386
RNA7	MF	GO:0030247	polysaccharide binding	0.0394	4.64386
RNA7	MF	GO:0097602	cullin family protein binding	0.0394	4.64386
RNA7	MF	GO:0051371	muscle alpha-actinin binding	0.0394	4.64386
RNA7	MF	GO:0019956	chemokine binding	0.0459	4.32193
RNA7	MF	GO:0008483	transaminase activity	0.0459	4.32193
RNA7	MF	GO:0031434	mitogen-activated protein kinase kinase ...	0.0459	4.32193
RNA7	MF	GO:0001223	transcription coactivator binding	0.0491	4.32193
RNA7	MF	GO:0005245	voltage-gated calcium channel activity	0.0491	4.32193
RNA8	MF	GO:0001222	transcription corepressor binding	0.00071	5.64386
RNA8	MF	GO:0004930	G protein-coupled receptor activity	0.01757	3.32193
RNA8	MF	GO:0008146	sulfotransferase activity	0.03129	5.05889
RNA8	MF	GO:0042813	Wnt-activated receptor activity	0.03408	5.05889
RNA8	MF	GO:0043565	sequence-specific DNA binding	0.03435	1.662
RNA8	MF	GO:0004012	phospholipid-translocating ATPase activi...	0.03687	4.64386
RNA8	MF	GO:0031492	nucleosomal DNA binding	0.03965	4.64386
RNA8	MF	GO:0003785	actin monomer binding	0.04795	4.32193
RNA9	MF	GO:0017124	SH3 domain binding	0.006	4.05889
RNA9	MF	GO:0045309	protein phosphorylated amino acid bindin...	0.012	5.32193
RNA9	MF	GO:0015295	solute:proton symporter activity	0.013	6.64386
RNA9	MF	GO:0019103	pyrimidine nucleotide binding	0.013	6.64386
RNA9	MF	GO:0098632	cell-cell adhesion mediator activity	0.014	6.64386
RNA9	MF	GO:0050431	transforming growth factor beta binding	0.023	5.64386
RNA9	MF	GO:1904680	peptide transmembrane transporter activi...	0.024	5.64386
RNA9	MF	GO:0042169	SH2 domain binding	0.026	5.05889
RNA9	MF	GO:0003823	antigen binding	0.028	5.05889
RNA9	MF	GO:0003755	peptidyl-prolyl cis-trans isomerase acti...	0.031	5.05889
RNA9	MF	GO:0001784	phosphotyrosine residue binding	0.037	4.64386
RNA10	MF	GO:0005178	integrin binding	0.0011	3.12029
RNA10	MF	GO:0001848	complement binding	0.0018	4.8365
RNA10	MF	GO:0008083	growth factor activity	0.0027	3.42146
RNA10	MF	GO:0008139	nuclear localization sequence binding	0.0037	4.47393
RNA10	MF	GO:0003725	double-stranded RNA binding	0.0039	3.22882
RNA10	MF	GO:0003779	actin binding	0.006	2.05889
RNA10	MF	GO:0005160	transforming growth factor beta receptor...	0.008	3.8365
RNA10	MF	GO:0001540	amyloid-beta binding	0.0114	3.64386
RNA10	MF	GO:0044877	protein-containing complex binding	0.0166	1.57611
RNA10	MF	GO:0005518	collagen binding	0.0236	3.05889
RNA10	MF	GO:0019843	rRNA binding	0.0246	3.32193
RNA10	MF	GO:0032549	ribonucleoside binding	0.027	0.599462
RNA10	MF	GO:0052689	carboxylic ester hydrolase activity	0.0496	2.47393
RNA11	MF	GO:0008536	Ran GTPase binding	9.3e-05	6.64386
RNA11	MF	GO:0034459	ATP-dependent 3'-5' RNA helicase activit...	0.0092	6.64386
RNA11	MF	GO:0008139	nuclear localization sequence binding	0.0098	6.64386
RNA11	MF	GO:0019789	SUMO transferase activity	0.0098	6.64386
RNA11	MF	GO:0003755	peptidyl-prolyl cis-trans isomerase acti...	0.0143	6.64386
RNA11	MF	GO:0016879	ligase activity, forming carbon-nitrogen...	0.0189	5.64386
RNA11	MF	GO:0035064	methylated histone binding	0.0263	5.05889
RNA12	MF	GO:0019888	protein phosphatase regulator activity	0.0021	4.8365
RNA12	MF	GO:0003705	transcription factor activity, RNA polym...	0.0035	4.47393
RNA12	MF	GO:0042826	histone deacetylase binding	0.0105	3.64386
RNA12	MF	GO:0052742	phosphatidylinositol kinase activity	0.0172	5.64386
RNA12	MF	GO:0016702	oxidoreductase activity, acting on singl...	0.0189	5.64386
RNA12	MF	GO:0008157	protein phosphatase 1 binding	0.0223	5.64386
RNA12	MF	GO:0001530	lipopolysaccharide binding	0.024	5.64386
RNA12	MF	GO:0000979	RNA polymerase II core promoter sequence...	0.024	5.64386
RNA12	MF	GO:0008198	ferrous iron binding	0.0257	5.05889
RNA12	MF	GO:0035259	glucocorticoid receptor binding	0.0257	5.05889
RNA12	MF	GO:0035613	RNA stem-loop binding	0.0274	5.05889
RNA12	MF	GO:0046915	transition metal ion transmembrane trans...	0.0341	5.05889
RNA12	MF	GO:0015662	ATPase activity, coupled to transmembran...	0.0341	5.05889
RNA12	MF	GO:0035198	miRNA binding	0.0374	4.64386
RNA12	MF	GO:0003755	peptidyl-prolyl cis-trans isomerase acti...	0.0424	4.64386
RNA12	MF	GO:0140104	molecular carrier activity	0.0457	4.32193
RNA12	MF	GO:0019901	protein kinase binding	0.0479	1.8365
RNA12	MF	GO:0035035	histone acetyltransferase binding	0.0491	4.32193
RNA12	MF	GO:0005507	copper ion binding	0.0491	4.32193
RNA13	MF	GO:0052744	phosphatidylinositol monophosphate phosp...	0.016	5.64386
RNA13	MF	GO:0048038	quinone binding	0.018	5.64386
RNA13	MF	GO:0008483	transaminase activity	0.021	5.64386
RNA13	MF	GO:0034593	phosphatidylinositol bisphosphate phosph...	0.025	5.05889
RNA13	MF	GO:0071949	FAD binding	0.034	5.05889
RNA13	MF	GO:0016504	peptidase activator activity	0.037	4.64386
RNA13	MF	GO:0031625	ubiquitin protein ligase binding	0.039	2.64386
RNA13	MF	GO:0048487	beta-tubulin binding	0.044	4.64386
RNA13	MF	GO:0051019	mitogen-activated protein kinase binding	0.046	4.32193
RNA13	MF	GO:0050660	flavin adenine dinucleotide binding	0.046	4.47393
RNA13	MF	GO:0030170	pyridoxal phosphate binding	0.047	4.32193
RNA14	MF	GO:0016620	oxidoreductase activity, acting on the a...	5e-05	4.94342
RNA14	MF	GO:0016818	hydrolase activity, acting on acid anhyd...	0.016	-0.480265
RNA14	MF	GO:0015238	drug transmembrane transporter activity	0.02	3.18442
RNA14	MF	GO:0004222	metalloendopeptidase activity	0.023	3.12029
RNA14	MF	GO:0016616	oxidoreductase activity, acting on the C...	0.036	3.05889
RNA15	MF	GO:0003735	structural constituent of ribosome	1.3e-09	2.63856
RNA15	MF	GO:0008137	NADH dehydrogenase (ubiquinone) activity	1e-05	3.47393
RNA15	MF	GO:0004129	cytochrome-c oxidase activity	0.00073	3.21759
RNA15	MF	GO:0019003	GDP binding	0.00192	2.18442
RNA15	MF	GO:0046933	proton-transporting ATP synthase activit...	0.00202	3.47393
RNA15	MF	GO:0009055	electron transfer activity	0.00215	2.70526
RNA15	MF	GO:0008266	poly(U) RNA binding	0.00998	2.70526
RNA15	MF	GO:0048156	tau protein binding	0.01174	2.61411
RNA15	MF	GO:0051087	chaperone binding	0.01205	1.64386
RNA15	MF	GO:0004683	calmodulin-dependent protein kinase acti...	0.01367	2.55639
RNA15	MF	GO:0019829	cation-transporting ATPase activity	0.02757	2.58496
RNA15	MF	GO:0015662	ATPase activity, coupled to transmembran...	0.02814	2.47393
RNA15	MF	GO:0019843	rRNA binding	0.03452	1.72738
RNA15	MF	GO:0004722	protein serine/threonine phosphatase act...	0.03733	1.65517
RNA15	MF	GO:0015078	proton transmembrane transporter activit...	0.03772	2.62755
RNA15	MF	GO:0043295	glutathione binding	0.04007	2.64386
RNA15	MF	GO:0015491	cation:cation antiporter activity	0.04007	2.64386
RNA15	MF	GO:0048487	beta-tubulin binding	0.04615	1.88897
RNA15	MF	GO:0042975	peroxisome proliferator activated recept...	0.04653	2.51457
RNA16	MF	GO:0051019	mitogen-activated protein kinase binding	0.0027	4.64386
RNA16	MF	GO:0002039	p53 binding	0.007	3.94342
RNA16	MF	GO:0008013	beta-catenin binding	0.0103	3.73697
RNA16	MF	GO:0031625	ubiquitin protein ligase binding	0.0156	2.47393
RNA16	MF	GO:0001085	RNA polymerase II transcription factor b...	0.0174	3.42146
RNA16	MF	GO:0042054	histone methyltransferase activity	0.0241	4.32193
RNA16	MF	GO:0004674	protein serine/threonine kinase activity	0.0241	2.51457
RNA16	MF	GO:0030554	adenyl nucleotide binding	0.0243	0.767339
RNA16	MF	GO:0050321	tau-protein kinase activity	0.0251	5.05889
RNA16	MF	GO:0016274	protein-arginine N-methyltransferase act...	0.0251	5.05889
RNA16	MF	GO:0005092	GDP-dissociation inhibitor activity	0.0251	5.05889
RNA16	MF	GO:0034236	protein kinase A catalytic subunit bindi...	0.0325	5.05889
RNA16	MF	GO:0030506	ankyrin binding	0.0325	5.05889
RNA16	MF	GO:0008327	methyl-CpG binding	0.0325	5.05889
RNA16	MF	GO:0030215	semaphorin receptor binding	0.0325	5.05889
RNA16	MF	GO:0016780	phosphotransferase activity, for other s...	0.035	4.64386
RNA16	MF	GO:0038191	neuropilin binding	0.035	4.64386
RNA16	MF	GO:0070840	dynein complex binding	0.0374	4.64386
RNA16	MF	GO:0003682	chromatin binding	0.0383	2.1047
RNA16	MF	GO:0008353	RNA polymerase II CTD heptapeptide repea...	0.0399	4.64386
RNA16	MF	GO:0003714	transcription corepressor activity	0.0406	2.64386
RNA16	MF	GO:0008168	methyltransferase activity	0.0413	3.27462
RNA16	MF	GO:0003785	actin monomer binding	0.0423	4.64386
RNA16	MF	GO:0017134	fibroblast growth factor binding	0.0423	4.64386
RNA16	MF	GO:0045499	chemorepellent activity	0.0423	4.64386
RNA16	MF	GO:0048156	tau protein binding	0.0448	4.32193
RNA16	MF	GO:0050998	nitric-oxide synthase binding	0.0472	4.32193
RNA16	MF	GO:0035255	ionotropic glutamate receptor binding	0.0472	4.32193
RNA16	MF	GO:0070064	proline-rich region binding	0.0472	4.32193
RNA16	MF	GO:0017025	TBP-class protein binding	0.0472	4.32193
RNA17	MF	GO:0051082	unfolded protein binding	2.5e-06	2.91896
RNA17	MF	GO:0031625	ubiquitin protein ligase binding	1.9e-05	1.91983
RNA17	MF	GO:0019843	rRNA binding	0.00036	2.8365
RNA17	MF	GO:0005515	protein binding	0.00039	0.390898
RNA17	MF	GO:0003735	structural constituent of ribosome	0.00193	1.98361
RNA17	MF	GO:0048027	mRNA 5'-UTR binding	0.0025	3.42146
RNA17	MF	GO:0003723	RNA binding	0.00398	1.52655
RNA17	MF	GO:0051117	ATPase binding	0.00482	2.18442
RNA17	MF	GO:0030332	cyclin binding	0.00484	3.09954
RNA17	MF	GO:0031072	heat shock protein binding	0.00644	1.77761
RNA17	MF	GO:0003743	translation initiation factor activity	0.00659	2.41504
RNA17	MF	GO:0005525	GTP binding	0.00802	1.2863
RNA17	MF	GO:0030515	snoRNA binding	0.01022	2.70526
RNA17	MF	GO:0008536	Ran GTPase binding	0.01136	2.67423
RNA17	MF	GO:0003729	mRNA binding	0.0121	1.67116
RNA17	MF	GO:0004197	cysteine-type endopeptidase activity	0.01457	2.074
RNA17	MF	GO:0003697	single-stranded DNA binding	0.0162	2.07097
RNA17	MF	GO:0042288	MHC class I protein binding	0.01796	3.25154
RNA17	MF	GO:0045505	dynein intermediate chain binding	0.01796	3.25154
RNA17	MF	GO:0044325	ion channel binding	0.01814	1.7084
RNA17	MF	GO:0003725	double-stranded RNA binding	0.01962	1.95736
RNA17	MF	GO:0008134	transcription factor binding	0.01989	1.16557
RNA17	MF	GO:0140142	nucleocytoplasmic carrier activity	0.02099	3.12029
RNA17	MF	GO:0001530	lipopolysaccharide binding	0.02421	3
RNA17	MF	GO:0004843	thiol-dependent ubiquitin-specific prote...	0.02434	1.8625
RNA17	MF	GO:0044183	protein binding involved in protein fold...	0.02762	2.94342
RNA17	MF	GO:0000983	transcription factor activity, RNA polym...	0.02762	2.94342
RNA17	MF	GO:0008649	rRNA methyltransferase activity	0.02762	2.94342
RNA17	MF	GO:0046982	protein heterodimerization activity	0.02915	0.93587
RNA17	MF	GO:0019905	syntaxin binding	0.03467	2.05889
RNA17	MF	GO:0017046	peptide hormone binding	0.03889	2.64386
RNA17	MF	GO:0042162	telomeric DNA binding	0.04255	2.55639
RNA17	MF	GO:0017025	TBP-class protein binding	0.04297	2.59946
RNA17	MF	GO:0048365	Rac GTPase binding	0.04389	1.92504
RNA17	MF	GO:0000977	RNA polymerase II regulatory region sequ...	0.04695	0.608232
RNA17	MF	GO:0004693	cyclin-dependent protein serine/threonin...	0.04721	2.51457
RNA17	MF	GO:0005484	SNAP receptor activity	0.04721	2.51457
RNA1	CC	GO:0005615	extracellular space	5e-21	1.90059
RNA1	CC	GO:0062023	collagen-containing extracellular matrix	1.8e-11	2.662
RNA1	CC	GO:0005604	basement membrane	3.2e-08	2.6568
RNA1	CC	GO:0042611	MHC protein complex	9.3e-07	3.94342
RNA1	CC	GO:0005614	interstitial matrix	9.3e-07	3.94342
RNA1	CC	GO:0099512	supramolecular fiber	1.4e-06	0.72547
RNA1	CC	GO:0009986	cell surface	1.8e-06	1.57508
RNA1	CC	GO:0005797	Golgi medial cisterna	2.6e-06	3.76939
RNA1	CC	GO:0016021	integral component of membrane	1.5e-05	0.767404
RNA1	CC	GO:0044420	extracellular matrix component	4.1e-05	2.8625
RNA1	CC	GO:0031012	extracellular matrix	0.0003	2.58006
RNA1	CC	GO:0005581	collagen trimer	0.00032	2.39593
RNA1	CC	GO:0005887	integral component of plasma membrane	0.00109	1.15077
RNA1	CC	GO:0005576	extracellular region	0.00112	1.94342
RNA1	CC	GO:0070971	endoplasmic reticulum exit site	0.00206	2.8365
RNA1	CC	GO:0009897	external side of plasma membrane	0.00261	1.42733
RNA1	CC	GO:0016327	apicolateral plasma membrane	0.00265	3.32193
RNA1	CC	GO:0065010	extracellular membrane-bounded organelle	0.00265	3.32193
RNA1	CC	GO:0071944	cell periphery	0.00338	0.708161
RNA1	CC	GO:0033655	host cell cytoplasm part	0.00356	3.18442
RNA1	CC	GO:0045178	basal part of cell	0.00459	2.18442
RNA1	CC	GO:0044456	synapse part	0.0119	0.361231
RNA1	CC	GO:0016328	lateral plasma membrane	0.01742	1.98564
RNA1	CC	GO:0044422	organelle part	0.01878	-0.632896
RNA1	CC	GO:0098982	GABA-ergic synapse	0.02114	1.90239
RNA1	CC	GO:0031410	cytoplasmic vesicle	0.02206	0.287731
RNA1	CC	GO:0044295	axonal growth cone	0.0231	2.27462
RNA1	CC	GO:0008021	synaptic vesicle	0.02762	1.29513
RNA1	CC	GO:0005871	kinesin complex	0.04054	1.96203
RNA1	CC	GO:0005886	plasma membrane	0.04174	0.652211
RNA1	CC	GO:0099738	cell cortex region	0.04464	1.90689
RNA2	CC	GO:0017119	Golgi transport complex	0.011	6.64386
RNA2	CC	GO:0034358	plasma lipoprotein particle	0.014	6.64386
RNA2	CC	GO:0030126	COPI vesicle coat	0.016	5.64386
RNA3	CC	GO:0000118	histone deacetylase complex	0.012	2.64386
RNA3	CC	GO:0005881	cytoplasmic microtubule	0.012	2.64386
RNA3	CC	GO:0044440	endosomal part	0.017	1.074
RNA3	CC	GO:0090568	nuclear transcriptional repressor comple...	0.027	2.94342
RNA3	CC	GO:0097708	intracellular vesicle	0.031	0.725621
RNA3	CC	GO:0030286	dynein complex	0.033	3.18442
RNA3	CC	GO:0008180	COP9 signalosome	0.041	2.64386
RNA4	CC	GO:0005581	collagen trimer	0.00092	3.98089
RNA4	CC	GO:0001726	ruffle	0.00209	3.18442
RNA4	CC	GO:0008305	integrin complex	0.00264	4.64386
RNA4	CC	GO:0044420	extracellular matrix component	0.0041	4.22882
RNA4	CC	GO:0000307	cyclin-dependent protein kinase holoenzy...	0.00591	4.05889
RNA4	CC	GO:0005615	extracellular space	0.00752	1.58702
RNA4	CC	GO:0062023	collagen-containing extracellular matrix	0.00927	2.44222
RNA4	CC	GO:0030027	lamellipodium	0.01492	2.52838
RNA4	CC	GO:0030864	cortical actin cytoskeleton	0.02398	3.05889
RNA4	CC	GO:0072686	mitotic spindle	0.02897	2.88897
RNA4	CC	GO:0005938	cell cortex	0.02935	2.30401
RNA4	CC	GO:0099059	integral component of presynaptic active...	0.04221	4.64386
RNA4	CC	GO:0000780	condensed nuclear chromosome, centromeri...	0.04221	4.64386
RNA4	CC	GO:0031527	filopodium membrane	0.04221	4.64386
RNA4	CC	GO:0032580	Golgi cisterna membrane	0.04221	4.64386
RNA4	CC	GO:0031528	microvillus membrane	0.04633	4.32193
RNA4	CC	GO:0030122	AP-2 adaptor complex	0.04633	4.32193
RNA5	CC	GO:0005667	transcription factor complex	0.0045	4.18442
RNA5	CC	GO:0048188	Set1C/COMPASS complex	0.005
RNA5	CC	GO:0070603	SWI/SNF superfamily-type complex	0.0287	5.05889
RNA6	CC	GO:0031594	neuromuscular junction	0.00022	4.64386
RNA6	CC	GO:0043195	terminal bouton	0.00128	5.32193
RNA6	CC	GO:0030027	lamellipodium	0.00207	3.52838
RNA6	CC	GO:0005886	plasma membrane	0.00239	1.4975
RNA6	CC	GO:0045177	apical part of cell	0.00802	2.8365
RNA6	CC	GO:0005901	caveola	0.00841	3.8365
RNA6	CC	GO:0044456	synapse part	0.01006	2.40864
RNA6	CC	GO:0005604	basement membrane	0.01107	3.64386
RNA6	CC	GO:0048471	perinuclear region of cytoplasm	0.01123	2.13606
RNA6	CC	GO:0031528	microvillus membrane	0.02342	5.64386
RNA6	CC	GO:0016342	catenin complex	0.02552	5.05889
RNA6	CC	GO:0005615	extracellular space	0.02597	1.77349
RNA6	CC	GO:0042383	sarcolemma	0.02691	2.94342
RNA6	CC	GO:0005916	fascia adherens	0.02762	5.05889
RNA6	CC	GO:0097386	glial cell projection	0.02762	5.05889
RNA6	CC	GO:0012506	vesicle membrane	0.03093	2.98089
RNA6	CC	GO:0045211	postsynaptic membrane	0.03299	2.78588
RNA6	CC	GO:0005868	cytoplasmic dynein complex	0.03597	4.64386
RNA6	CC	GO:0099092	postsynaptic density, intracellular comp...	0.03805	4.64386
RNA6	CC	GO:0030672	synaptic vesicle membrane	0.04015	4.18442
RNA6	CC	GO:0099512	supramolecular fiber	0.04196	1.44746
RNA6	CC	GO:0030285	integral component of synaptic vesicle m...	0.04219	4.64386
RNA6	CC	GO:0005719	nuclear euchromatin	0.04631	4.32193
RNA6	CC	GO:0016235	aggresome	0.04837	4.32193
RNA7	CC	GO:0062023	collagen-containing extracellular matrix	0.001	3
RNA7	CC	GO:0005615	extracellular space	0.0058	1.88136
RNA7	CC	GO:0005604	basement membrane	0.0282	2.94342
RNA7	CC	GO:0019898	extrinsic component of membrane	0.0333	2.27462
RNA7	CC	GO:0098562	cytoplasmic side of membrane	0.0371	2.51457
RNA7	CC	GO:0005921	gap junction	0.0379	4.64386
RNA7	CC	GO:0030867	rough endoplasmic reticulum membrane	0.0413	4.64386
RNA7	CC	GO:0034045	phagophore assembly site membrane	0.0413	4.64386
RNA7	CC	GO:0032982	myosin filament	0.0413	4.64386
RNA7	CC	GO:0005891	voltage-gated calcium channel complex	0.0447	4.32193
RNA7	CC	GO:0016460	myosin II complex	0.0447	4.32193
RNA8	CC	GO:0005865	striated muscle thin filament	0.0018	5.05889
RNA8	CC	GO:0005737	cytoplasm	0.016	0.186662
RNA8	CC	GO:0031091	platelet alpha granule	0.0302	5.05889
RNA8	CC	GO:0031083	BLOC-1 complex	0.039	4.64386
RNA9	CC	GO:0016021	integral component of membrane	0.019	1.35845
RNA10	CC	GO:0034663	endoplasmic reticulum chaperone complex	2.9e-05	5.64386
RNA10	CC	GO:0071437	invadopodium	0.0014	5.05889
RNA10	CC	GO:0005925	focal adhesion	0.004	2.62149
RNA10	CC	GO:0008305	integrin complex	0.0047	4.32193
RNA10	CC	GO:0071782	endoplasmic reticulum tubular network	0.0064	4.05889
RNA10	CC	GO:0005615	extracellular space	0.0092	1.52376
RNA10	CC	GO:0034399	nuclear periphery	0.0095	2.47393
RNA10	CC	GO:0043209	myelin sheath	0.0123	2.152
RNA10	CC	GO:0031256	leading edge membrane	0.0128	3.25154
RNA10	CC	GO:0005622	intracellular	0.0162	-0.0091517
RNA10	CC	GO:0030667	secretory granule membrane	0.0172	3.32193
RNA10	CC	GO:0009898	cytoplasmic side of plasma membrane	0.0216	2.52838
RNA10	CC	GO:0005788	endoplasmic reticulum lumen	0.0222	3.12029
RNA10	CC	GO:0032587	ruffle membrane	0.0232	3.05889
RNA10	CC	GO:0005902	microvillus	0.0288	2.88897
RNA10	CC	GO:0016323	basolateral plasma membrane	0.0291	2.16273
RNA10	CC	GO:0030315	T-tubule	0.0336	2.78588
RNA10	CC	GO:0048471	perinuclear region of cytoplasm	0.0336	1.29808
RNA10	CC	GO:0009986	cell surface	0.0345	1.74385
RNA10	CC	GO:0009897	external side of plasma membrane	0.0451	1.90689
RNA11	CC	GO:0005643	nuclear pore	0.034	5.05889
RNA11	CC	GO:0005694	chromosome	0.039	2.18442
RNA12	CC	GO:0030140	trans-Golgi network transport vesicle	0.00057	5.64386
RNA12	CC	GO:0005802	trans-Golgi network	0.0018	3.58496
RNA12	CC	GO:0008287	protein serine/threonine phosphatase com...	0.00219	4.8365
RNA12	CC	GO:0043204	perikaryon	0.00417	4.32193
RNA12	CC	GO:0016605	PML body	0.00447	4.32193
RNA12	CC	GO:0045121	membrane raft	0.00671	2.90689
RNA12	CC	GO:0005741	mitochondrial outer membrane	0.01819	3.25154
RNA12	CC	GO:0031588	nucleotide-activated protein kinase comp...	0.02153	5.64386
RNA12	CC	GO:0031083	BLOC-1 complex	0.0233	5.64386
RNA12	CC	GO:0033643	host cell part	0.02508	5.05889
RNA12	CC	GO:0000779	condensed chromosome, centromeric region	0.03739	4.64386
RNA12	CC	GO:0046658	anchored component of plasma membrane	0.0461	4.32193
RNA12	CC	GO:0000407	phagophore assembly site	0.04956	4.32193
RNA13	CC	GO:0042645	mitochondrial nucleoid	0.0014	5.05889
RNA13	CC	GO:0005776	autophagosome	0.0028	4.64386
RNA13	CC	GO:0005737	cytoplasm	0.0118	0.481659
RNA13	CC	GO:0080008	Cul4-RING E3 ubiquitin ligase complex	0.0333	5.05889
RNA13	CC	GO:0005739	mitochondrion	0.0347	1.86625
RNA13	CC	GO:0005743	mitochondrial inner membrane	0.0353	2.64386
RNA13	CC	GO:0000407	phagophore assembly site	0.0405	4.64386
RNA13	CC	GO:0055038	recycling endosome membrane	0.0433	4.64386
RNA13	CC	GO:0035861	site of double-strand break	0.0475	4.32193
RNA14	CC	GO:0005739	mitochondrion	7.1e-08	2.37291
RNA14	CC	GO:0043209	myelin sheath	1e-07	3.43874
RNA14	CC	GO:0005743	mitochondrial inner membrane	1.3e-06	3.46552
RNA14	CC	GO:0005747	mitochondrial respiratory chain complex ...	1.5e-06	4.64386
RNA14	CC	GO:0005750	mitochondrial respiratory chain complex ...	1.6e-05	5.90689
RNA14	CC	GO:1990204	oxidoreductase complex	0.00044	4.64386
RNA14	CC	GO:0045277	respiratory chain complex IV	0.00208	4.8365
RNA14	CC	GO:0005758	mitochondrial intermembrane space	0.00274	3.42146
RNA14	CC	GO:0005763	mitochondrial small ribosomal subunit	0.0083	3.8365
RNA14	CC	GO:0070069	cytochrome complex	0.00996	5.05889
RNA14	CC	GO:0031305	integral component of mitochondrial inne...	0.01026	3.73697
RNA15	CC	GO:0005762	mitochondrial large ribosomal subunit	1.7e-07	2.89383
RNA15	CC	GO:0005753	mitochondrial proton-transporting ATP sy...	1.4e-06	3.90689
RNA15	CC	GO:0005739	mitochondrion	1.7e-06	1.52769
RNA15	CC	GO:0005763	mitochondrial small ribosomal subunit	3.9e-06	3.32193
RNA15	CC	GO:0033177	proton-transporting two-sector ATPase co...	2.2e-05	3.71786
RNA15	CC	GO:0005747	mitochondrial respiratory chain complex ...	5.7e-05	2.77879
RNA15	CC	GO:0005746	mitochondrial respiratory chain	0.00049	2.82794
RNA15	CC	GO:1902495	transmembrane transporter complex	0.00061	1.36463
RNA15	CC	GO:0005743	mitochondrial inner membrane	0.00093	2.05057
RNA15	CC	GO:0043209	myelin sheath	0.00097	1.52146
RNA15	CC	GO:1904949	ATPase complex	0.00201	1.00723
RNA15	CC	GO:0098800	inner mitochondrial membrane protein com...	0.00323	2.78326
RNA15	CC	GO:0042645	mitochondrial nucleoid	0.00324	2.29336
RNA15	CC	GO:0045277	respiratory chain complex IV	0.00447	3.09954
RNA15	CC	GO:0005737	cytoplasm	0.00692	0.244719
RNA15	CC	GO:0014704	intercalated disc	0.01241	1.84684
RNA15	CC	GO:0071782	endoplasmic reticulum tubular network	0.01774	2.42146
RNA15	CC	GO:0035770	ribonucleoprotein granule	0.02306	0.0892673
RNA15	CC	GO:0005759	mitochondrial matrix	0.02489	2.3934
RNA15	CC	GO:0008287	protein serine/threonine phosphatase com...	0.02501	2.25154
RNA15	CC	GO:0031304	intrinsic component of mitochondrial inn...	0.02657	2.32193
RNA15	CC	GO:0005654	nucleoplasm	0.02942	0.175806
RNA15	CC	GO:0098993	anchored component of synaptic vesicle m...	0.03962	2.64386
RNA15	CC	GO:0030914	STAGA complex	0.03962	2.64386
RNA15	CC	GO:0031305	integral component of mitochondrial inne...	0.0417	1.94342
RNA16	CC	GO:0098685	Schaffer collateral - CA1 synapse	0.0096	3.73697
RNA16	CC	GO:0035097	histone methyltransferase complex	0.0147	3.39593
RNA16	CC	GO:0098978	glutamatergic synapse	0.0224	2.27462
RNA16	CC	GO:0071004	U2-type prespliceosome	0.0295	5.05889
RNA16	CC	GO:0019908	nuclear cyclin-dependent protein kinase ...	0.0319	5.05889
RNA16	CC	GO:0005686	U2 snRNP	0.0415	4.64386
RNA16	CC	GO:0001772	immunological synapse	0.0415	4.64386
RNA16	CC	GO:0032806	carboxy-terminal domain protein kinase c...	0.0463	4.32193
RNA16	CC	GO:0060076	excitatory synapse	0.0487	4.32193
RNA17	CC	GO:0101031	chaperone complex	5.2e-06	4.15843
RNA17	CC	GO:0022627	cytosolic small ribosomal subunit	6.4e-05	3.50635
RNA17	CC	GO:0005730	nucleolus	0.00022	1.20956
RNA17	CC	GO:0005838	proteasome regulatory particle	0.00028	3.59946
RNA17	CC	GO:0005790	smooth endoplasmic reticulum	0.00075	3.25154
RNA17	CC	GO:0008023	transcription elongation factor complex	0.00088	2.71786
RNA17	CC	GO:0014069	postsynaptic density	0.00222	1.5487
RNA17	CC	GO:0005654	nucleoplasm	0.00228	0.741696
RNA17	CC	GO:0044297	cell body	0.00233	0.736966
RNA17	CC	GO:0005634	nucleus	0.0048	0.532266
RNA17	CC	GO:0036464	cytoplasmic ribonucleoprotein granule	0.00591	1.53235
RNA17	CC	GO:0098978	glutamatergic synapse	0.00595	1.2704
RNA17	CC	GO:0098589	membrane region	0.00661	0.733535
RNA17	CC	GO:0032993	protein-DNA complex	0.00768	1.60677
RNA17	CC	GO:0001669	acrosomal vesicle	0.00788	2.34008
RNA17	CC	GO:0005635	nuclear envelope	0.00832	1.33587
RNA17	CC	GO:0015030	Cajal body	0.00939	2.76939
RNA17	CC	GO:0120111	neuron projection cytoplasm	0.0111	2.58496
RNA17	CC	GO:0022625	cytosolic large ribosomal subunit	0.01585	2.47393
RNA17	CC	GO:0034663	endoplasmic reticulum chaperone complex	0.01668	3.32193
RNA17	CC	GO:0000124	SAGA complex	0.01668	3.32193
RNA17	CC	GO:0044292	dendrite terminus	0.01668	3.32193
RNA17	CC	GO:1990904	ribonucleoprotein complex	0.01809	1.32317
RNA17	CC	GO:0042588	zymogen granule	0.01978	3.18442
RNA17	CC	GO:0099523	presynaptic cytosol	0.02309	3.05889
RNA17	CC	GO:0042175	nuclear outer membrane-endoplasmic retic...	0.02524	1.04147
RNA17	CC	GO:0043209	myelin sheath	0.02526	1.28129
RNA17	CC	GO:0016607	nuclear speck	0.02644	1.08586
RNA17	CC	GO:0043034	costamere	0.02662	2.94342
RNA17	CC	GO:0030127	COPII vesicle coat	0.02662	2.94342
RNA17	CC	GO:0005801	cis-Golgi network	0.02821	2.18442
RNA17	CC	GO:0097038	perinuclear endoplasmic reticulum	0.03427	2.73697
RNA17	CC	GO:0030176	integral component of endoplasmic reticu...	0.03463	1.46594
RNA17	CC	GO:0030135	coated vesicle	0.03553	1.70722
RNA17	CC	GO:0098945	intrinsic component of presynaptic activ...	0.03638	3.18442
RNA17	CC	GO:0005788	endoplasmic reticulum lumen	0.03702	2.01937
RNA17	CC	GO:0005829	cytosol	0.03888	0.542922
RNA17	CC	GO:0005643	nuclear pore	0.03892	2.08927
RNA17	CC	GO:0035267	NuA4 histone acetyltransferase complex	0.04266	2.59946
RNA17	CC	GO:0099524	postsynaptic cytosol	0.04266	2.59946
RNA17	CC	GO:0005769	early endosome	0.04534	1.09806

## Sheet: Ribo
Cluster	Ontology	GO	Term	Pval	LogEnriched
Ribo1	BP	GO:0007155	cell adhesion	4.3e-06	1.27579
Ribo1	BP	GO:0003418	growth plate cartilage chondrocyte diffe...	3.8e-05	4.25154
Ribo1	BP	GO:0003433	chondrocyte development involved in endo...	3.8e-05	4.25154
Ribo1	BP	GO:0072012	glomerulus vasculature development	0.00025	3.64386
Ribo1	BP	GO:0072102	glomerulus morphogenesis	0.00075	3.98089
Ribo1	BP	GO:0072010	glomerular epithelium development	0.00101	3.8365
Ribo1	BP	GO:0061098	positive regulation of protein tyrosine ...	0.00101	3.12029
Ribo1	BP	GO:0048546	digestive tract morphogenesis	0.00101	3.12029
Ribo1	BP	GO:1903725	regulation of phospholipid metabolic pro...	0.00125	2.95936
Ribo1	BP	GO:0002052	positive regulation of neuroblast prolif...	0.00133	3.70526
Ribo1	BP	GO:0060536	cartilage morphogenesis	0.00133	3.70526
Ribo1	BP	GO:0043536	positive regulation of blood vessel endo...	0.00158	2.53952
Ribo1	BP	GO:0035303	regulation of dephosphorylation	0.00212	1.0218
Ribo1	BP	GO:0021801	cerebral cortex radial glia guided migra...	0.00214	3.47393
Ribo1	BP	GO:0048661	positive regulation of smooth muscle cel...	0.00251	2.04891
Ribo1	BP	GO:0072210	metanephric nephron development	0.00264	3.37084
Ribo1	BP	GO:0001947	heart looping	0.00271	2.76121
Ribo1	BP	GO:0038084	vascular endothelial growth factor signa...	0.00316	2.8625
Ribo1	BP	GO:0061298	retina vasculature development in camera...	0.0032	3.27462
Ribo1	BP	GO:0030198	extracellular matrix organization	0.00423	1.89383
Ribo1	BP	GO:0002064	epithelial cell development	0.00448	1.76734
Ribo1	BP	GO:0035850	epithelial cell differentiation involved...	0.00453	3.14136
Ribo1	BP	GO:0001662	behavioral fear response	0.00453	3.14136
Ribo1	BP	GO:0014037	Schwann cell differentiation	0.00514	2.52838
Ribo1	BP	GO:2000401	regulation of lymphocyte migration	0.00515	2.34618
Ribo1	BP	GO:0035162	embryonic hemopoiesis	0.00531	3.05889
Ribo1	BP	GO:0031954	positive regulation of protein autophosp...	0.00531	3.05889
Ribo1	BP	GO:0001525	angiogenesis	0.00545	1.30847
Ribo1	BP	GO:0014065	phosphatidylinositol 3-kinase signaling	0.00595	2.14136
Ribo1	BP	GO:0001558	regulation of cell growth	0.00597	1.03451
Ribo1	BP	GO:0046856	phosphatidylinositol dephosphorylation	0.00708	2.90689
Ribo1	BP	GO:0051965	positive regulation of synapse assembly	0.00809	2.8365
Ribo1	BP	GO:0060485	mesenchyme development	0.00908	1.39593
Ribo1	BP	GO:0030199	collagen fibril organization	0.00965	2.25154
Ribo1	BP	GO:0051642	centrosome localization	0.01291	2.58496
Ribo1	BP	GO:0006024	glycosaminoglycan biosynthetic process	0.01291	2.58496
Ribo1	BP	GO:0000904	cell morphogenesis involved in different...	0.01304	0.987431
Ribo1	BP	GO:0050867	positive regulation of cell activation	0.01439	1.26139
Ribo1	BP	GO:0051569	regulation of histone H3-K4 methylation	0.01464	2.98089
Ribo1	BP	GO:0098801	regulation of renal system process	0.01465	2.8365
Ribo1	BP	GO:0008038	neuron recognition	0.01465	2.70526
Ribo1	BP	GO:0060947	cardiac vascular smooth muscle cell diff...	0.01478	3.39593
Ribo1	BP	GO:1903975	regulation of glial cell migration	0.01478	3.39593
Ribo1	BP	GO:0030859	polarized epithelial cell differentiatio...	0.01478	3.39593
Ribo1	BP	GO:0045647	negative regulation of erythrocyte diffe...	0.01478	3.39593
Ribo1	BP	GO:0072111	cell proliferation involved in kidney de...	0.01478	3.39593
Ribo1	BP	GO:0046886	positive regulation of hormone biosynthe...	0.01478	3.39593
Ribo1	BP	GO:0072215	regulation of metanephros development	0.01478	3.39593
Ribo1	BP	GO:0045936	negative regulation of phosphate metabol...	0.01544	-0.473008
Ribo1	BP	GO:2000379	positive regulation of reactive oxygen s...	0.01573	1.77349
Ribo1	BP	GO:0051048	negative regulation of secretion	0.01765	1.12658
Ribo1	BP	GO:0001773	myeloid dendritic cell activation	0.01784	3.25154
Ribo1	BP	GO:0090179	planar cell polarity pathway involved in...	0.01784	3.25154
Ribo1	BP	GO:2000516	positive regulation of CD4-positive, alp...	0.01784	3.25154
Ribo1	BP	GO:0072537	fibroblast activation	0.01784	3.25154
Ribo1	BP	GO:0035089	establishment of apical/basal cell polar...	0.01784	3.25154
Ribo1	BP	GO:0002475	antigen processing and presentation via ...	0.01784	3.25154
Ribo1	BP	GO:0042249	establishment of planar polarity of embr...	0.01891	3.47393
Ribo1	BP	GO:0009060	aerobic respiration	0.01893	1.90239
Ribo1	BP	GO:0042490	mechanoreceptor differentiation	0.01908	1.49411
Ribo1	BP	GO:0016053	organic acid biosynthetic process	0.01933	-0.356144
Ribo1	BP	GO:0043410	positive regulation of MAPK cascade	0.02006	0.91866
Ribo1	BP	GO:0060560	developmental growth involved in morphog...	0.0201	1.62891
Ribo1	BP	GO:0008344	adult locomotory behavior	0.02067	1.87567
Ribo1	BP	GO:0048265	response to pain	0.02114	3.12029
Ribo1	BP	GO:0030204	chondroitin sulfate metabolic process	0.02114	3.12029
Ribo1	BP	GO:0014047	glutamate secretion	0.02114	3.12029
Ribo1	BP	GO:2001028	positive regulation of endothelial cell ...	0.02114	3.12029
Ribo1	BP	GO:0035791	platelet-derived growth factor receptor-...	0.02114	3.12029
Ribo1	BP	GO:0051957	positive regulation of amino acid transp...	0.02114	3.12029
Ribo1	BP	GO:0022038	corpus callosum development	0.02114	3.12029
Ribo1	BP	GO:0002237	response to molecule of bacterial origin	0.02153	0.0639118
Ribo1	BP	GO:0001938	positive regulation of endothelial cell ...	0.02189	1.90239
Ribo1	BP	GO:0007186	G protein-coupled receptor signaling pat...	0.02233	1.36858
Ribo1	BP	GO:0009306	protein secretion	0.02262	0.540568
Ribo1	BP	GO:0032963	collagen metabolic process	0.02385	2.25154
Ribo1	BP	GO:0019882	antigen processing and presentation	0.02432	2.0145
Ribo1	BP	GO:0007219	Notch signaling pathway	0.02448	1.37333
Ribo1	BP	GO:0002483	antigen processing and presentation of e...	0.02467	3
Ribo1	BP	GO:2000353	positive regulation of endothelial cell ...	0.02467	3
Ribo1	BP	GO:0035265	organ growth	0.02691	1.86541
Ribo1	BP	GO:0070886	positive regulation of calcineurin-NFAT ...	0.02843	2.88897
Ribo1	BP	GO:0030325	adrenal gland development	0.02843	2.88897
Ribo1	BP	GO:0071364	cellular response to epidermal growth fa...	0.0287	2.16273
Ribo1	BP	GO:0060079	excitatory postsynaptic potential	0.0287	2.16273
Ribo1	BP	GO:0045926	negative regulation of growth	0.03238	0.621488
Ribo1	BP	GO:0097028	dendritic cell differentiation	0.03239	2.78588
Ribo1	BP	GO:0001709	cell fate determination	0.03239	2.78588
Ribo1	BP	GO:0021952	central nervous system projection neuron...	0.03239	2.78588
Ribo1	BP	GO:0062009	secondary palate development	0.03239	2.78588
Ribo1	BP	GO:0042060	wound healing	0.03283	1.0514
Ribo1	BP	GO:0043552	positive regulation of phosphatidylinosi...	0.03656	2.68966
Ribo1	BP	GO:0061003	positive regulation of dendritic spine m...	0.03656	2.68966
Ribo1	BP	GO:0070208	protein heterotrimerization	0.03656	2.68966
Ribo1	BP	GO:0098609	cell-cell adhesion	0.0371	1.11582
Ribo1	BP	GO:0044703	multi-organism reproductive process	0.0378	0.240844
Ribo1	BP	GO:0007411	axon guidance	0.03795	1.4344
Ribo1	BP	GO:0016042	lipid catabolic process	0.03865	0.424688
Ribo1	BP	GO:0050768	negative regulation of neurogenesis	0.04007	1.02495
Ribo1	BP	GO:1903204	negative regulation of oxidative stress-...	0.04093	2.64386
Ribo1	BP	GO:0090184	positive regulation of kidney developmen...	0.04093	2.64386
Ribo1	BP	GO:0071242	cellular response to ammonium ion	0.04093	2.64386
Ribo1	BP	GO:0002474	antigen processing and presentation of p...	0.04093	2.64386
Ribo1	BP	GO:0060255	regulation of macromolecule metabolic pr...	0.04522	0.0469716
Ribo1	BP	GO:0007369	gastrulation	0.04525	1.08161
Ribo1	BP	GO:0001916	positive regulation of T cell mediated c...	0.04548	2.55639
Ribo1	BP	GO:0040019	positive regulation of embryonic develop...	0.04548	2.55639
Ribo1	BP	GO:0007611	learning or memory	0.04913	1.32795
Ribo1	BP	GO:0051928	positive regulation of calcium ion trans...	0.04957	1.74904
Ribo2	BP	GO:0051348	negative regulation of transferase activ...	4.3e-05	1.58208
Ribo2	BP	GO:0031065	positive regulation of histone deacetyla...	0.00036	4.42146
Ribo2	BP	GO:0002478	antigen processing and presentation of e...	0.00063	4.14136
Ribo2	BP	GO:0002250	adaptive immune response	0.00159	1.97143
Ribo2	BP	GO:0045087	innate immune response	0.00253	1.47895
Ribo2	BP	GO:0045540	regulation of cholesterol biosynthetic p...	0.00391	4.32193
Ribo2	BP	GO:1902932	positive regulation of alcohol biosynthe...	0.00391	4.32193
Ribo2	BP	GO:0010984	regulation of lipoprotein particle clear...	0.00391	4.32193
Ribo2	BP	GO:0006974	cellular response to DNA damage stimulus	0.00465	0.65355
Ribo2	BP	GO:1902402	signal transduction involved in mitotic ...	0.00475	4.18442
Ribo2	BP	GO:0032689	negative regulation of interferon-gamma ...	0.00475	4.18442
Ribo2	BP	GO:0010893	positive regulation of steroid biosynthe...	0.00665	4.05889
Ribo2	BP	GO:0002483	antigen processing and presentation of e...	0.00665	4.05889
Ribo2	BP	GO:0048535	lymph node development	0.00665	4.05889
Ribo2	BP	GO:1902187	negative regulation of viral release fro...	0.00665	4.05889
Ribo2	BP	GO:0002313	mature B cell differentiation involved i...	0.00665	4.05889
Ribo2	BP	GO:0010867	positive regulation of triglyceride bios...	0.00771	3.94342
Ribo2	BP	GO:0061158	3'-UTR-mediated mRNA destabilization	0.00771	3.94342
Ribo2	BP	GO:1903214	regulation of protein targeting to mitoc...	0.00771	3.94342
Ribo2	BP	GO:0070230	positive regulation of lymphocyte apopto...	0.00771	3.94342
Ribo2	BP	GO:0031571	mitotic G1 DNA damage checkpoint	0.00884	3.8365
Ribo2	BP	GO:0034383	low-density lipoprotein particle clearan...	0.00884	3.8365
Ribo2	BP	GO:2001238	positive regulation of extrinsic apoptot...	0.00967	2.76939
Ribo2	BP	GO:1903146	regulation of autophagy of mitochondrion	0.00985	3.32193
Ribo2	BP	GO:0043153	entrainment of circadian clock by photop...	0.01131	3.64386
Ribo2	BP	GO:0002474	antigen processing and presentation of p...	0.01131	3.64386
Ribo2	BP	GO:0006661	phosphatidylinositol biosynthetic proces...	0.01242	3.01937
Ribo2	BP	GO:0045992	negative regulation of embryonic develop...	0.01405	3.47393
Ribo2	BP	GO:0071353	cellular response to interleukin-4	0.01551	3.39593
Ribo2	BP	GO:0035794	positive regulation of mitochondrial mem...	0.01895	3.39593
Ribo2	BP	GO:0042987	amyloid precursor protein catabolic proc...	0.01896	3.05889
Ribo2	BP	GO:0050863	regulation of T cell activation	0.0192	0.610433
Ribo2	BP	GO:0030155	regulation of cell adhesion	0.01925	0.136062
Ribo2	BP	GO:0050853	B cell receptor signaling pathway	0.02027	3.18442
Ribo2	BP	GO:0071158	positive regulation of cell cycle arrest	0.02375	3.05889
Ribo2	BP	GO:1902895	positive regulation of pri-miRNA transcr...	0.02375	3.05889
Ribo2	BP	GO:0065003	protein-containing complex assembly	0.02406	0.0534393
Ribo2	BP	GO:0016477	cell migration	0.02535	0.584963
Ribo2	BP	GO:0045124	regulation of bone resorption	0.02557	3
Ribo2	BP	GO:1904894	positive regulation of STAT cascade	0.02833	2.68966
Ribo2	BP	GO:0034446	substrate adhesion-dependent cell spread...	0.02897	2.22882
Ribo2	BP	GO:0046627	negative regulation of insulin receptor ...	0.02937	2.88897
Ribo2	BP	GO:0032720	negative regulation of tumor necrosis fa...	0.02937	2.88897
Ribo2	BP	GO:0051972	regulation of telomerase activity	0.03547	2.73697
Ribo2	BP	GO:0042771	intrinsic apoptotic signaling pathway in...	0.03547	2.73697
Ribo2	BP	GO:0009896	positive regulation of catabolic process	0.03744	0.732165
Ribo2	BP	GO:0046365	monosaccharide catabolic process	0.03755	3.12029
Ribo2	BP	GO:0015031	protein transport	0.04539	0.759855
Ribo2	BP	GO:0034103	regulation of tissue remodeling	0.04574	3.05889
Ribo2	BP	GO:0002369	T cell cytokine production	0.04667	3.8365
Ribo2	BP	GO:0009299	mRNA transcription	0.0467	3.32193
Ribo2	BP	GO:0070897	transcription preinitiation complex asse...	0.04672	3.12029
Ribo2	BP	GO:0042633	hair cycle	0.04688	1.88897
Ribo2	BP	GO:0071902	positive regulation of protein serine/th...	0.04913	0.980891
Ribo3	BP	GO:0032897	negative regulation of viral transcripti...	0.0013	5.32193
Ribo3	BP	GO:1902187	negative regulation of viral release fro...	0.0013	5.32193
Ribo3	BP	GO:0005980	glycogen catabolic process	0.0017	5.05889
Ribo3	BP	GO:0005979	regulation of glycogen biosynthetic proc...	0.0033	4.47393
Ribo3	BP	GO:0043470	regulation of carbohydrate catabolic pro...	0.009	3.8365
Ribo3	BP	GO:0031329	regulation of cellular catabolic process	0.0193	1.2863
Ribo3	BP	GO:0042147	retrograde transport, endosome to Golgi	0.0259	3
Ribo3	BP	GO:0019693	ribose phosphate metabolic process	0.0327	0.678072
Ribo3	BP	GO:0043170	macromolecule metabolic process	0.0345	-0.552793
Ribo3	BP	GO:0060047	heart contraction	0.036	1.76121
Ribo3	BP	GO:0042246	tissue regeneration	0.0395	4.05889
Ribo3	BP	GO:1903975	regulation of glial cell migration	0.0405	4.64386
Ribo3	BP	GO:0006122	mitochondrial electron transport, ubiqui...	0.0405	4.64386
Ribo3	BP	GO:0006662	glycerol ether metabolic process	0.0405	4.64386
Ribo3	BP	GO:0002861	regulation of inflammatory response to a...	0.0405	4.64386
Ribo3	BP	GO:0003174	mitral valve development	0.0405	4.64386
Ribo3	BP	GO:0051127	positive regulation of actin nucleation	0.0405	4.64386
Ribo3	BP	GO:0060979	vasculogenesis involved in coronary vasc...	0.0405	4.64386
Ribo3	BP	GO:0009650	UV protection	0.0405	4.64386
Ribo3	BP	GO:0032107	regulation of response to nutrient level...	0.0405	4.64386
Ribo3	BP	GO:0060413	atrial septum morphogenesis	0.0444	4.32193
Ribo3	BP	GO:0042481	regulation of odontogenesis	0.0444	4.32193
Ribo3	BP	GO:0009954	proximal/distal pattern formation	0.0444	4.32193
Ribo3	BP	GO:0018158	protein oxidation	0.0444	4.32193
Ribo3	BP	GO:0045651	positive regulation of macrophage differ...	0.0444	4.32193
Ribo3	BP	GO:0030324	lung development	0.0446	2.64386
Ribo3	BP	GO:0046597	negative regulation of viral entry into ...	0.0484	4.32193
Ribo3	BP	GO:0010002	cardioblast differentiation	0.0484	4.32193
Ribo3	BP	GO:0034104	negative regulation of tissue remodeling	0.0484	4.32193
Ribo3	BP	GO:0048566	embryonic digestive tract development	0.0484	4.32193
Ribo3	BP	GO:0003188	heart valve formation	0.0484	4.32193
Ribo3	BP	GO:0003180	aortic valve morphogenesis	0.0484	4.32193
Ribo3	BP	GO:0060055	angiogenesis involved in wound healing	0.0484	4.32193
Ribo3	BP	GO:0050995	negative regulation of lipid catabolic p...	0.0484	4.32193
Ribo3	BP	GO:0051156	glucose 6-phosphate metabolic process	0.0484	4.32193
Ribo3	BP	GO:0051450	myoblast proliferation	0.0484	4.32193
Ribo3	BP	GO:0033599	regulation of mammary gland epithelial c...	0.0484	4.32193
Ribo3	BP	GO:0019682	glyceraldehyde-3-phosphate metabolic pro...	0.0484	4.32193
Ribo4	BP	GO:0030198	extracellular matrix organization	1.2e-06	2.76121
Ribo4	BP	GO:0001525	angiogenesis	3.8e-06	1.88336
Ribo4	BP	GO:0010811	positive regulation of cell-substrate ad...	8.6e-05	2.56704
Ribo4	BP	GO:0010466	negative regulation of peptidase activit...	9.6e-05	2.56704
Ribo4	BP	GO:0038083	peptidyl-tyrosine autophosphorylation	0.00021	3.73697
Ribo4	BP	GO:0010561	negative regulation of glycoprotein bios...	0.00038	4.32193
Ribo4	BP	GO:0032835	glomerulus development	0.00042	3.01159
Ribo4	BP	GO:0003416	endochondral bone growth	0.00067	3.51457
Ribo4	BP	GO:0043243	positive regulation of protein complex d...	0.00067	3.59946
Ribo4	BP	GO:2001028	positive regulation of endothelial cell ...	0.00069	4.05889
Ribo4	BP	GO:0014745	negative regulation of muscle adaptation	0.00069	4.05889
Ribo4	BP	GO:0006470	protein dephosphorylation	0.00075	1.64386
Ribo4	BP	GO:0001569	branching involved in blood vessel morph...	0.00079	3.21759
Ribo4	BP	GO:0002043	blood vessel endothelial cell proliferat...	0.00088	3.90689
Ribo4	BP	GO:0007155	cell adhesion	0.00101	1.78588
Ribo4	BP	GO:0045926	negative regulation of growth	0.00121	2.08648
Ribo4	BP	GO:0010463	mesenchymal cell proliferation	0.00134	2.5009
Ribo4	BP	GO:0051897	positive regulation of protein kinase B ...	0.00155	2.55639
Ribo4	BP	GO:0007156	homophilic cell adhesion via plasma memb...	0.0023	2.8365
Ribo4	BP	GO:0033138	positive regulation of peptidyl-serine p...	0.00245	2.4112
Ribo4	BP	GO:2000352	negative regulation of endothelial cell ...	0.00325	3.32193
Ribo4	BP	GO:0080134	regulation of response to stress	0.00387	1.07996
Ribo4	BP	GO:0010951	negative regulation of endopeptidase act...	0.00428	1.8625
Ribo4	BP	GO:0030199	collagen fibril organization	0.00435	2.57777
Ribo4	BP	GO:1901031	regulation of response to reactive oxyge...	0.00455	2.70526
Ribo4	BP	GO:0030335	positive regulation of cell migration	0.00457	1.57508
Ribo4	BP	GO:0001666	response to hypoxia	0.0047	1.49411
Ribo4	BP	GO:0046326	positive regulation of glucose import	0.00552	3.01937
Ribo4	BP	GO:0009968	negative regulation of signal transducti...	0.00591	0.998689
Ribo4	BP	GO:0050999	regulation of nitric-oxide synthase acti...	0.00599	3.47393
Ribo4	BP	GO:0007569	cell aging	0.00604	2.25154
Ribo4	BP	GO:0007162	negative regulation of cell adhesion	0.00606	1.41504
Ribo4	BP	GO:0071320	cellular response to cAMP	0.00621	2.98089
Ribo4	BP	GO:0001658	branching involved in ureteric bud morph...	0.00621	2.98089
Ribo4	BP	GO:0010524	positive regulation of calcium ion trans...	0.00764	2.76939
Ribo4	BP	GO:0045766	positive regulation of angiogenesis	0.00812	2.06751
Ribo4	BP	GO:0006816	calcium ion transport	0.00883	1.75147
Ribo4	BP	GO:0070374	positive regulation of ERK1 and ERK2 cas...	0.00912	1.73697
Ribo4	BP	GO:0030336	negative regulation of cell migration	0.0092	1.96016
Ribo4	BP	GO:0030949	positive regulation of vascular endothel...	0.00955	3.73697
Ribo4	BP	GO:0010523	negative regulation of calcium ion trans...	0.00955	3.73697
Ribo4	BP	GO:0045019	negative regulation of nitric oxide bios...	0.00955	3.73697
Ribo4	BP	GO:0010224	response to UV-B	0.00955	3.73697
Ribo4	BP	GO:0044406	adhesion of symbiont to host	0.00955	3.73697
Ribo4	BP	GO:0031069	hair follicle morphogenesis	0.00955	3.73697
Ribo4	BP	GO:0017014	protein nitrosylation	0.00955	3.73697
Ribo4	BP	GO:0006958	complement activation, classical pathway	0.00955	3.73697
Ribo4	BP	GO:0048875	chemical homeostasis within a tissue	0.00955	3.73697
Ribo4	BP	GO:0009792	embryo development ending in birth or eg...	0.00965	0.228114
Ribo4	BP	GO:0008584	male gonad development	0.01023	2.23447
Ribo4	BP	GO:0001938	positive regulation of endothelial cell ...	0.01023	2.23447
Ribo4	BP	GO:0007186	G protein-coupled receptor signaling pat...	0.01034	1.56064
Ribo4	BP	GO:0050830	defense response to Gram-positive bacter...	0.01037	2.70526
Ribo4	BP	GO:0009617	response to bacterium	0.01069	1.32554
Ribo4	BP	GO:0048286	lung alveolus development	0.01136	2.67423
Ribo4	BP	GO:0043030	regulation of macrophage activation	0.01143	3.01937
Ribo4	BP	GO:0090263	positive regulation of canonical Wnt sig...	0.01155	2.18442
Ribo4	BP	GO:0007043	cell-cell junction assembly	0.01155	2.18442
Ribo4	BP	GO:0042532	negative regulation of tyrosine phosphor...	0.01156	3.55639
Ribo4	BP	GO:0042832	defense response to protozoan	0.01156	3.55639
Ribo4	BP	GO:1904181	positive regulation of membrane depolari...	0.01156	3.55639
Ribo4	BP	GO:0031639	plasminogen activation	0.01156	3.55639
Ribo4	BP	GO:0043627	response to estrogen	0.01239	2.61411
Ribo4	BP	GO:0007166	cell surface receptor signaling pathway	0.01254	0.834161
Ribo4	BP	GO:0030308	negative regulation of cell growth	0.01257	2.03653
Ribo4	BP	GO:0042149	cellular response to glucose starvation	0.01348	2.58496
Ribo4	BP	GO:0045725	positive regulation of glycogen biosynth...	0.01374	3.47393
Ribo4	BP	GO:0003188	heart valve formation	0.01374	3.47393
Ribo4	BP	GO:0000188	inactivation of MAPK activity	0.01374	3.47393
Ribo4	BP	GO:0010039	response to iron ion	0.01374	3.47393
Ribo4	BP	GO:0052652	cyclic purine nucleotide metabolic proce...	0.01374	3.47393
Ribo4	BP	GO:0016339	calcium-dependent cell-cell adhesion via...	0.01374	3.47393
Ribo4	BP	GO:0014733	regulation of skeletal muscle adaptation	0.01374	3.47393
Ribo4	BP	GO:0045807	positive regulation of endocytosis	0.01436	1.61706
Ribo4	BP	GO:0019932	second-messenger-mediated signaling	0.0145	1.79586
Ribo4	BP	GO:0052547	regulation of peptidase activity	0.01451	1.76611
Ribo4	BP	GO:0010559	regulation of glycoprotein biosynthetic ...	0.01481	3.71786
Ribo4	BP	GO:0016485	protein processing	0.01493	2.03653
Ribo4	BP	GO:0014887	cardiac muscle adaptation	0.01503	3.18442
Ribo4	BP	GO:1900047	negative regulation of hemostasis	0.01503	3.09954
Ribo4	BP	GO:0014741	negative regulation of muscle hypertroph...	0.01504	2.80255
Ribo4	BP	GO:0150076	neuroinflammatory response	0.01514	2.73697
Ribo4	BP	GO:0048771	tissue remodeling	0.01524	1.82794
Ribo4	BP	GO:0008217	regulation of blood pressure	0.01548	1.77596
Ribo4	BP	GO:0043903	regulation of symbiosis, encompassing mu...	0.01578	1.38082
Ribo4	BP	GO:0048662	negative regulation of smooth muscle cel...	0.01582	2.5009
Ribo4	BP	GO:0001541	ovarian follicle development	0.01582	2.5009
Ribo4	BP	GO:0003081	regulation of systemic arterial blood pr...	0.01607	3.32193
Ribo4	BP	GO:0045986	negative regulation of smooth muscle con...	0.01607	3.32193
Ribo4	BP	GO:2000050	regulation of non-canonical Wnt signalin...	0.01607	3.32193
Ribo4	BP	GO:0045821	positive regulation of glycolytic proces...	0.01607	3.32193
Ribo4	BP	GO:0045879	negative regulation of smoothened signal...	0.01607	3.32193
Ribo4	BP	GO:2000209	regulation of anoikis	0.01607	3.32193
Ribo4	BP	GO:1900746	regulation of vascular endothelial growt...	0.01607	3.32193
Ribo4	BP	GO:0002920	regulation of humoral immune response	0.01607	3.32193
Ribo4	BP	GO:0008285	negative regulation of cell proliferatio...	0.0169	1.37084
Ribo4	BP	GO:0050922	negative regulation of chemotaxis	0.01811	3.08927
Ribo4	BP	GO:0014068	positive regulation of phosphatidylinosi...	0.01838	2.42146
Ribo4	BP	GO:0007263	nitric oxide mediated signal transductio...	0.01857	3.25154
Ribo4	BP	GO:0070886	positive regulation of calcineurin-NFAT ...	0.01857	3.25154
Ribo4	BP	GO:0044331	cell-cell adhesion mediated by cadherin	0.01857	3.25154
Ribo4	BP	GO:0045730	respiratory burst	0.01857	3.25154
Ribo4	BP	GO:0009593	detection of chemical stimulus	0.01857	3.25154
Ribo4	BP	GO:0060333	interferon-gamma-mediated signaling path...	0.01857	3.25154
Ribo4	BP	GO:0050728	negative regulation of inflammatory resp...	0.01975	1.94342
Ribo4	BP	GO:0035725	sodium ion transmembrane transport	0.0205	2.55639
Ribo4	BP	GO:0050850	positive regulation of calcium-mediated ...	0.02068	3.18442
Ribo4	BP	GO:0002063	chondrocyte development	0.02096	2.90689
Ribo4	BP	GO:0051354	negative regulation of oxidoreductase ac...	0.02121	3.12029
Ribo4	BP	GO:0034123	positive regulation of toll-like recepto...	0.02121	3.12029
Ribo4	BP	GO:0051900	regulation of mitochondrial depolarizati...	0.02121	3.12029
Ribo4	BP	GO:0002320	lymphoid progenitor cell differentiation	0.02121	3.12029
Ribo4	BP	GO:0090050	positive regulation of cell migration in...	0.02121	3.12029
Ribo4	BP	GO:0051770	positive regulation of nitric-oxide synt...	0.02121	3.12029
Ribo4	BP	GO:0090025	regulation of monocyte chemotaxis	0.02121	3.12029
Ribo4	BP	GO:0048015	phosphatidylinositol-mediated signaling	0.02269	2.40682
Ribo4	BP	GO:0001101	response to acid chemical	0.02269	1.76121
Ribo4	BP	GO:0034332	adherens junction organization	0.02336	1.8997
Ribo4	BP	GO:0060173	limb development	0.02373	1.46395
Ribo4	BP	GO:0043171	peptide catabolic process	0.02401	3.05889
Ribo4	BP	GO:0085029	extracellular matrix assembly	0.02401	3.05889
Ribo4	BP	GO:0022617	extracellular matrix disassembly	0.02401	3.05889
Ribo4	BP	GO:0048843	negative regulation of axon extension in...	0.02401	3.05889
Ribo4	BP	GO:0033688	regulation of osteoblast proliferation	0.02401	3.05889
Ribo4	BP	GO:0044342	type B pancreatic cell proliferation	0.02401	3.05889
Ribo4	BP	GO:0090090	negative regulation of canonical Wnt sig...	0.02603	1.82368
Ribo4	BP	GO:0097237	cellular response to toxic substance	0.02625	1.80591
Ribo4	BP	GO:0030282	bone mineralization	0.0264	2.25154
Ribo4	BP	GO:0032309	icosanoid secretion	0.02694	2.94342
Ribo4	BP	GO:1903055	positive regulation of extracellular mat...	0.02694	2.94342
Ribo4	BP	GO:0001936	regulation of endothelial cell prolifera...	0.02935	2.2863
Ribo4	BP	GO:0006112	energy reserve metabolic process	0.02974	2.1047
Ribo4	BP	GO:0042311	vasodilation	0.03001	2.88897
Ribo4	BP	GO:0071425	hematopoietic stem cell proliferation	0.03001	2.88897
Ribo4	BP	GO:0098869	cellular oxidant detoxification	0.03004	3.05889
Ribo4	BP	GO:0070265	necrotic cell death	0.03011	1.78588
Ribo4	BP	GO:1901862	negative regulation of muscle tissue dev...	0.03013	1.62149
Ribo4	BP	GO:0018108	peptidyl-tyrosine phosphorylation	0.03105	1.79141
Ribo4	BP	GO:0010035	response to inorganic substance	0.03117	1.35476
Ribo4	BP	GO:0010565	regulation of cellular ketone metabolic ...	0.03315	1.35845
Ribo4	BP	GO:0045747	positive regulation of Notch signaling p...	0.03321	2.78588
Ribo4	BP	GO:0019048	modulation by virus of host morphology o...	0.03321	2.78588
Ribo4	BP	GO:2001258	negative regulation of cation channel ac...	0.03321	2.78588
Ribo4	BP	GO:0043085	positive regulation of catalytic activit...	0.03349	0.825932
Ribo4	BP	GO:0070059	intrinsic apoptotic signaling pathway in...	0.03628	2.03899
Ribo4	BP	GO:0010955	negative regulation of protein processin...	0.03654	2.73697
Ribo4	BP	GO:0048663	neuron fate commitment	0.03654	2.73697
Ribo4	BP	GO:0030155	regulation of cell adhesion	0.03664	1.71936
Ribo4	BP	GO:0098609	cell-cell adhesion	0.03702	1.44278
Ribo4	BP	GO:0033077	T cell differentiation in thymus	0.03823	2
Ribo4	BP	GO:0014898	cardiac muscle hypertrophy in response t...	0.03999	2.64386
Ribo4	BP	GO:1901532	regulation of hematopoietic progenitor c...	0.03999	2.64386
Ribo4	BP	GO:0002686	negative regulation of leukocyte migrati...	0.03999	2.64386
Ribo4	BP	GO:0001570	vasculogenesis	0.04163	2.08927
Ribo4	BP	GO:0046903	secretion	0.04297	0.836501
Ribo4	BP	GO:0042445	hormone metabolic process	0.04346	1.35845
Ribo4	BP	GO:0051894	positive regulation of focal adhesion as...	0.04356	2.59946
Ribo4	BP	GO:0048741	skeletal muscle fiber development	0.04356	2.59946
Ribo4	BP	GO:0042593	glucose homeostasis	0.04375	1.30757
Ribo4	BP	GO:0042310	vasoconstriction	0.04423	2.34008
Ribo4	BP	GO:0014897	striated muscle hypertrophy	0.0444	1.59946
Ribo4	BP	GO:1901890	positive regulation of cell junction ass...	0.04443	2.98089
Ribo4	BP	GO:0050866	negative regulation of cell activation	0.04443	1.49411
Ribo4	BP	GO:0014910	regulation of smooth muscle cell migrati...	0.04462	1.64386
Ribo4	BP	GO:0031343	positive regulation of cell killing	0.04477	2.21759
Ribo4	BP	GO:0016239	positive regulation of macroautophagy	0.04654	1.88897
Ribo4	BP	GO:0007189	adenylate cyclase-activating G protein-c...	0.04673	2.44746
Ribo4	BP	GO:0048844	artery morphogenesis	0.04684	2.05889
Ribo4	BP	GO:0050919	negative chemotaxis	0.04724	2.51457
Ribo4	BP	GO:0060325	face morphogenesis	0.04724	2.51457
Ribo4	BP	GO:0034105	positive regulation of tissue remodeling	0.04724	2.51457
Ribo4	BP	GO:0030513	positive regulation of BMP signaling pat...	0.04724	2.51457
Ribo4	BP	GO:0018198	peptidyl-cysteine modification	0.04724	2.51457
Ribo4	BP	GO:0090279	regulation of calcium ion import	0.04724	2.51457
Ribo4	BP	GO:0070373	negative regulation of ERK1 and ERK2 cas...	0.04875	1.87127
Ribo5	BP	GO:0001754	eye photoreceptor cell differentiation	0.00016	6.64386
Ribo5	BP	GO:0060324	face development	0.00077	5.64386
Ribo5	BP	GO:0007608	sensory perception of smell	0.01139	6.64386
Ribo5	BP	GO:0006206	pyrimidine nucleobase metabolic process	0.01139	6.64386
Ribo5	BP	GO:0032107	regulation of response to nutrient level...	0.01139	6.64386
Ribo5	BP	GO:0044320	cellular response to leptin stimulus	0.01139	6.64386
Ribo5	BP	GO:0061307	cardiac neural crest cell differentiatio...	0.01139	6.64386
Ribo5	BP	GO:0060632	regulation of microtubule-based movement	0.01139	6.64386
Ribo5	BP	GO:1904355	positive regulation of telomere capping	0.01139	6.64386
Ribo5	BP	GO:0003341	cilium movement	0.01139	6.64386
Ribo5	BP	GO:0030878	thyroid gland development	0.01253	6.64386
Ribo5	BP	GO:0042219	cellular modified amino acid catabolic p...	0.01253	6.64386
Ribo5	BP	GO:0034982	mitochondrial protein processing	0.01253	6.64386
Ribo5	BP	GO:1903358	regulation of Golgi organization	0.01366	6.64386
Ribo5	BP	GO:0048313	Golgi inheritance	0.01366	6.64386
Ribo5	BP	GO:0002043	blood vessel endothelial cell proliferat...	0.01479	6.64386
Ribo5	BP	GO:0042461	photoreceptor cell development	0.01479	6.64386
Ribo5	BP	GO:0032094	response to food	0.01479	6.64386
Ribo5	BP	GO:0060438	trachea development	0.01479	6.64386
Ribo5	BP	GO:0033160	positive regulation of protein import in...	0.01479	6.64386
Ribo5	BP	GO:0002029	desensitization of G protein-coupled rec...	0.01479	6.64386
Ribo5	BP	GO:0001895	retina homeostasis	0.01592	5.64386
Ribo5	BP	GO:0045724	positive regulation of cilium assembly	0.01592	5.64386
Ribo5	BP	GO:0007512	adult heart development	0.01705	5.64386
Ribo5	BP	GO:0044273	sulfur compound catabolic process	0.01817	5.64386
Ribo5	BP	GO:2000641	regulation of early endosome to late end...	0.01817	5.64386
Ribo5	BP	GO:0060716	labyrinthine layer blood vessel developm...	0.01817	5.64386
Ribo5	BP	GO:0035176	social behavior	0.01817	5.64386
Ribo5	BP	GO:0071276	cellular response to cadmium ion	0.0193	5.64386
Ribo5	BP	GO:0071242	cellular response to ammonium ion	0.0193	5.64386
Ribo5	BP	GO:0043951	negative regulation of cAMP-mediated sig...	0.0193	5.64386
Ribo5	BP	GO:0048854	brain morphogenesis	0.0193	5.64386
Ribo5	BP	GO:0010800	positive regulation of peptidyl-threonin...	0.0193	5.64386
Ribo5	BP	GO:0003085	negative regulation of systemic arterial...	0.0193	5.64386
Ribo5	BP	GO:0071870	cellular response to catecholamine stimu...	0.0193	5.64386
Ribo5	BP	GO:0051457	maintenance of protein location in nucle...	0.02155	5.64386
Ribo5	BP	GO:0034453	microtubule anchoring	0.02155	5.64386
Ribo5	BP	GO:0003407	neural retina development	0.02155	5.64386
Ribo5	BP	GO:0033598	mammary gland epithelial cell proliferat...	0.02267	5.64386
Ribo5	BP	GO:0051281	positive regulation of release of seques...	0.02267	5.64386
Ribo5	BP	GO:0040018	positive regulation of multicellular org...	0.02379	5.64386
Ribo5	BP	GO:0006506	GPI anchor biosynthetic process	0.02379	5.64386
Ribo5	BP	GO:0003401	axis elongation	0.02379	5.64386
Ribo5	BP	GO:0060042	retina morphogenesis in camera-type eye	0.02491	5.05889
Ribo5	BP	GO:0043330	response to exogenous dsRNA	0.02491	5.05889
Ribo5	BP	GO:0021591	ventricular system development	0.02491	5.05889
Ribo5	BP	GO:0032212	positive regulation of telomere maintena...	0.02603	5.05889
Ribo5	BP	GO:0050853	B cell receptor signaling pathway	0.02603	5.05889
Ribo5	BP	GO:0000096	sulfur amino acid metabolic process	0.02603	5.05889
Ribo5	BP	GO:0034260	negative regulation of GTPase activity	0.02603	5.05889
Ribo5	BP	GO:0009948	anterior/posterior axis specification	0.02715	5.05889
Ribo5	BP	GO:0051973	positive regulation of telomerase activi...	0.02715	5.05889
Ribo5	BP	GO:0071539	protein localization to centrosome	0.02826	5.05889
Ribo5	BP	GO:0009880	embryonic pattern specification	0.02826	5.05889
Ribo5	BP	GO:0006515	protein quality control for misfolded or...	0.02826	5.05889
Ribo5	BP	GO:0061512	protein localization to cilium	0.02938	5.05889
Ribo5	BP	GO:1903672	positive regulation of sprouting angioge...	0.03049	5.05889
Ribo5	BP	GO:0048645	animal organ formation	0.03161	5.05889
Ribo5	BP	GO:0021766	hippocampus development	0.03272	5.05889
Ribo5	BP	GO:0015031	protein transport	0.03457	1.24013
Ribo5	BP	GO:0006821	chloride transport	0.03494	4.64386
Ribo5	BP	GO:0043627	response to estrogen	0.03605	4.64386
Ribo5	BP	GO:0048538	thymus development	0.03715	4.64386
Ribo5	BP	GO:0060425	lung morphogenesis	0.03715	4.64386
Ribo5	BP	GO:0060612	adipose tissue development	0.03715	4.64386
Ribo5	BP	GO:0031663	lipopolysaccharide-mediated signaling pa...	0.03715	4.64386
Ribo5	BP	GO:1905515	non-motile cilium assembly	0.03715	4.64386
Ribo5	BP	GO:0034198	cellular response to amino acid starvati...	0.04047	4.64386
Ribo5	BP	GO:0070849	response to epidermal growth factor	0.04267	4.64386
Ribo5	BP	GO:0030641	regulation of cellular pH	0.04377	4.64386
Ribo5	BP	GO:0048708	astrocyte differentiation	0.04377	4.64386
Ribo5	BP	GO:0030837	negative regulation of actin filament po...	0.04377	4.64386
Ribo5	BP	GO:0060291	long-term synaptic potentiation	0.04487	4.32193
Ribo5	BP	GO:0032465	regulation of cytokinesis	0.04597	4.32193
Ribo5	BP	GO:0001756	somitogenesis	0.04597	4.32193
Ribo5	BP	GO:0030900	forebrain development	0.0491	3.32193
Ribo6	BP	GO:0016525	negative regulation of angiogenesis	3.3e-05	5.42146
Ribo6	BP	GO:0048483	autonomic nervous system development	0.00014	6.64386
Ribo6	BP	GO:2000243	positive regulation of reproductive proc...	0.00043	6.05889
Ribo6	BP	GO:0007275	multicellular organism development	0.00154	1.34618
Ribo6	BP	GO:0007165	signal transduction	0.00769	0.862496
Ribo6	BP	GO:0000122	negative regulation of transcription by ...	0.00859	2.70526
Ribo6	BP	GO:0031069	hair follicle morphogenesis	0.00912	6.64386
Ribo6	BP	GO:0072215	regulation of metanephros development	0.00912	6.64386
Ribo6	BP	GO:0044851	hair cycle phase	0.00912	6.64386
Ribo6	BP	GO:0007398	ectoderm development	0.00912	6.64386
Ribo6	BP	GO:0006953	acute-phase response	0.00912	6.64386
Ribo6	BP	GO:1905331	negative regulation of morphogenesis of ...	0.00912	6.64386
Ribo6	BP	GO:0060947	cardiac vascular smooth muscle cell diff...	0.00912	6.64386
Ribo6	BP	GO:0032331	negative regulation of chondrocyte diffe...	0.01003	6.64386
Ribo6	BP	GO:0060571	morphogenesis of an epithelial fold	0.01003	6.64386
Ribo6	BP	GO:0031128	developmental induction	0.01003	6.64386
Ribo6	BP	GO:0009954	proximal/distal pattern formation	0.01003	6.64386
Ribo6	BP	GO:0051481	negative regulation of cytosolic calcium...	0.01003	6.64386
Ribo6	BP	GO:0006825	copper ion transport	0.01003	6.64386
Ribo6	BP	GO:0045603	positive regulation of endothelial cell ...	0.01094	6.64386
Ribo6	BP	GO:0042634	regulation of hair cycle	0.01094	6.64386
Ribo6	BP	GO:0048265	response to pain	0.01094	6.64386
Ribo6	BP	GO:0035813	regulation of renal sodium excretion	0.01094	6.64386
Ribo6	BP	GO:0099560	synaptic membrane adhesion	0.01094	6.64386
Ribo6	BP	GO:0035115	embryonic forelimb morphogenesis	0.01094	6.64386
Ribo6	BP	GO:0035809	regulation of urine volume	0.01094	6.64386
Ribo6	BP	GO:0014733	regulation of skeletal muscle adaptation	0.01094	6.64386
Ribo6	BP	GO:0061154	endothelial tube morphogenesis	0.01094	6.64386
Ribo6	BP	GO:0002052	positive regulation of neuroblast prolif...	0.01094	6.64386
Ribo6	BP	GO:0060914	heart formation	0.01185	6.64386
Ribo6	BP	GO:0030201	heparan sulfate proteoglycan metabolic p...	0.01185	6.64386
Ribo6	BP	GO:2000136	regulation of cell proliferation involve...	0.01185	6.64386
Ribo6	BP	GO:0060438	trachea development	0.01185	6.64386
Ribo6	BP	GO:0071542	dopaminergic neuron differentiation	0.01185	6.64386
Ribo6	BP	GO:0000578	embryonic axis specification	0.01185	6.64386
Ribo6	BP	GO:0010560	positive regulation of glycoprotein bios...	0.01275	6.64386
Ribo6	BP	GO:0061311	cell surface receptor signaling pathway ...	0.01275	6.64386
Ribo6	BP	GO:0021801	cerebral cortex radial glia guided migra...	0.01275	6.64386
Ribo6	BP	GO:1903429	regulation of cell maturation	0.01275	6.64386
Ribo6	BP	GO:0030318	melanocyte differentiation	0.01275	6.64386
Ribo6	BP	GO:0046688	response to copper ion	0.01275	6.64386
Ribo6	BP	GO:0002089	lens morphogenesis in camera-type eye	0.01275	6.64386
Ribo6	BP	GO:0048820	hair follicle maturation	0.01275	6.64386
Ribo6	BP	GO:0050678	regulation of epithelial cell proliferat...	0.01325	4.05889
Ribo6	BP	GO:0007063	regulation of sister chromatid cohesion	0.01366	6.64386
Ribo6	BP	GO:0045686	negative regulation of glial cell differ...	0.01366	6.64386
Ribo6	BP	GO:0060795	cell fate commitment involved in formati...	0.01366	6.64386
Ribo6	BP	GO:0021545	cranial nerve development	0.01366	6.64386
Ribo6	BP	GO:0001709	cell fate determination	0.01366	6.64386
Ribo6	BP	GO:2000679	positive regulation of transcription reg...	0.01366	6.64386
Ribo6	BP	GO:0072210	metanephric nephron development	0.01366	6.64386
Ribo6	BP	GO:0035116	embryonic hindlimb morphogenesis	0.01366	6.64386
Ribo6	BP	GO:0003156	regulation of animal organ formation	0.01456	6.64386
Ribo6	BP	GO:0060441	epithelial tube branching involved in lu...	0.01456	6.64386
Ribo6	BP	GO:1905332	positive regulation of morphogenesis of ...	0.01456	6.64386
Ribo6	BP	GO:0048643	positive regulation of skeletal muscle t...	0.01456	6.64386
Ribo6	BP	GO:0033233	regulation of protein sumoylation	0.01456	6.64386
Ribo6	BP	GO:0045671	negative regulation of osteoclast differ...	0.01547	5.64386
Ribo6	BP	GO:1903204	negative regulation of oxidative stress-...	0.01547	5.64386
Ribo6	BP	GO:0014829	vascular smooth muscle contraction	0.01547	5.64386
Ribo6	BP	GO:0035987	endodermal cell differentiation	0.01547	5.64386
Ribo6	BP	GO:0035561	regulation of chromatin binding	0.01637	5.64386
Ribo6	BP	GO:0060479	lung cell differentiation	0.01637	5.64386
Ribo6	BP	GO:0051930	regulation of sensory perception of pain	0.01637	5.64386
Ribo6	BP	GO:0035850	epithelial cell differentiation involved...	0.01637	5.64386
Ribo6	BP	GO:0040019	positive regulation of embryonic develop...	0.01637	5.64386
Ribo6	BP	GO:0019934	cGMP-mediated signaling	0.01637	5.64386
Ribo6	BP	GO:0040036	regulation of fibroblast growth factor r...	0.01637	5.64386
Ribo6	BP	GO:0042311	vasodilation	0.01637	5.64386
Ribo6	BP	GO:0097755	positive regulation of blood vessel diam...	0.01674	5.64386
Ribo6	BP	GO:0051145	smooth muscle cell differentiation	0.01676	5.64386
Ribo6	BP	GO:0003407	neural retina development	0.01727	5.64386
Ribo6	BP	GO:0045992	negative regulation of embryonic develop...	0.01727	5.64386
Ribo6	BP	GO:0048806	genitalia development	0.01727	5.64386
Ribo6	BP	GO:0031063	regulation of histone deacetylation	0.01817	5.64386
Ribo6	BP	GO:0001702	gastrulation with mouth forming second	0.01817	5.64386
Ribo6	BP	GO:0001708	cell fate specification	0.01817	5.64386
Ribo6	BP	GO:0045815	positive regulation of gene expression, ...	0.01817	5.64386
Ribo6	BP	GO:0051569	regulation of histone H3-K4 methylation	0.01817	5.64386
Ribo6	BP	GO:2000144	positive regulation of DNA-templated tra...	0.01817	5.64386
Ribo6	BP	GO:0007618	mating	0.01908	5.64386
Ribo6	BP	GO:0110111	negative regulation of animal organ morp...	0.01908	5.64386
Ribo6	BP	GO:0060042	retina morphogenesis in camera-type eye	0.01998	5.64386
Ribo6	BP	GO:0070076	histone lysine demethylation	0.01998	5.64386
Ribo6	BP	GO:0060977	coronary vasculature morphogenesis	0.01998	5.64386
Ribo6	BP	GO:0048565	digestive tract development	0.02071	5.32193
Ribo6	BP	GO:0048599	oocyte development	0.02088	5.64386
Ribo6	BP	GO:0031641	regulation of myelination	0.02088	5.64386
Ribo6	BP	GO:0030857	negative regulation of epithelial cell d...	0.02088	5.64386
Ribo6	BP	GO:0030166	proteoglycan biosynthetic process	0.02088	5.64386
Ribo6	BP	GO:0048246	macrophage chemotaxis	0.02088	5.64386
Ribo6	BP	GO:0032212	positive regulation of telomere maintena...	0.02088	5.64386
Ribo6	BP	GO:0090279	regulation of calcium ion import	0.02088	5.64386
Ribo6	BP	GO:0002053	positive regulation of mesenchymal cell ...	0.02088	5.64386
Ribo6	BP	GO:0030901	midbrain development	0.02088	5.64386
Ribo6	BP	GO:0009790	embryo development	0.02138	1.73697
Ribo6	BP	GO:0048546	digestive tract morphogenesis	0.02177	5.64386
Ribo6	BP	GO:0009948	anterior/posterior axis specification	0.02177	5.64386
Ribo6	BP	GO:0048713	regulation of oligodendrocyte differenti...	0.02177	5.64386
Ribo6	BP	GO:0051973	positive regulation of telomerase activi...	0.02177	5.64386
Ribo6	BP	GO:0001658	branching involved in ureteric bud morph...	0.02267	5.64386
Ribo6	BP	GO:0042551	neuron maturation	0.02267	5.64386
Ribo6	BP	GO:0032355	response to estradiol	0.02267	5.64386
Ribo6	BP	GO:0002673	regulation of acute inflammatory respons...	0.02267	5.64386
Ribo6	BP	GO:0001937	negative regulation of endothelial cell ...	0.02357	5.64386
Ribo6	BP	GO:0010677	negative regulation of cellular carbohyd...	0.02357	5.64386
Ribo6	BP	GO:0001569	branching involved in blood vessel morph...	0.02536	5.05889
Ribo6	BP	GO:2000008	regulation of protein localization to ce...	0.02536	5.05889
Ribo6	BP	GO:0072132	mesenchyme morphogenesis	0.02536	5.05889
Ribo6	BP	GO:0031057	negative regulation of histone modificat...	0.02536	5.05889
Ribo6	BP	GO:0071260	cellular response to mechanical stimulus	0.02536	5.05889
Ribo6	BP	GO:0001755	neural crest cell migration	0.02626	5.05889
Ribo6	BP	GO:0031016	pancreas development	0.02626	5.05889
Ribo6	BP	GO:0014009	glial cell proliferation	0.02626	5.05889
Ribo6	BP	GO:0060688	regulation of morphogenesis of a branchi...	0.02626	5.05889
Ribo6	BP	GO:0061028	establishment of endothelial barrier	0.02715	5.05889
Ribo6	BP	GO:0030850	prostate gland development	0.02715	5.05889
Ribo6	BP	GO:0007200	phospholipase C-activating G protein-cou...	0.02715	5.05889
Ribo6	BP	GO:0010718	positive regulation of epithelial to mes...	0.02715	5.05889
Ribo6	BP	GO:1904888	cranial skeletal system development	0.02715	5.05889
Ribo6	BP	GO:0042475	odontogenesis of dentin-containing tooth	0.02894	5.05889
Ribo6	BP	GO:0043627	response to estrogen	0.02894	5.05889
Ribo6	BP	GO:0045682	regulation of epidermis development	0.02894	5.05889
Ribo6	BP	GO:0006366	transcription by RNA polymerase II	0.02913	1.92961
Ribo6	BP	GO:0048538	thymus development	0.02983	5.05889
Ribo6	BP	GO:0006111	regulation of gluconeogenesis	0.02983	5.05889
Ribo6	BP	GO:0043434	response to peptide hormone	0.03059	3.55639
Ribo6	BP	GO:0031327	negative regulation of cellular biosynth...	0.03063	2.30401
Ribo6	BP	GO:0010596	negative regulation of endothelial cell ...	0.03072	5.05889
Ribo6	BP	GO:0097306	cellular response to alcohol	0.03161	5.05889
Ribo6	BP	GO:0055010	ventricular cardiac muscle tissue morpho...	0.03161	5.05889
Ribo6	BP	GO:0048704	embryonic skeletal system morphogenesis	0.0325	5.05889
Ribo6	BP	GO:0046605	regulation of centrosome cycle	0.0325	5.05889
Ribo6	BP	GO:0006879	cellular iron ion homeostasis	0.0325	5.05889
Ribo6	BP	GO:0048469	cell maturation	0.0333	4.8365
Ribo6	BP	GO:0009953	dorsal/ventral pattern formation	0.03339	5.05889
Ribo6	BP	GO:0007156	homophilic cell adhesion via plasma memb...	0.03339	5.05889
Ribo6	BP	GO:0060038	cardiac muscle cell proliferation	0.03428	5.05889
Ribo6	BP	GO:0045453	bone resorption	0.03428	5.05889
Ribo6	BP	GO:0007422	peripheral nervous system development	0.03428	5.05889
Ribo6	BP	GO:0042733	embryonic digit morphogenesis	0.03517	4.64386
Ribo6	BP	GO:0110110	positive regulation of animal organ morp...	0.03606	4.64386
Ribo6	BP	GO:0045669	positive regulation of osteoblast differ...	0.03783	4.64386
Ribo6	BP	GO:0097327	response to antineoplastic agent	0.03872	4.64386
Ribo6	BP	GO:0035050	embryonic heart tube development	0.04137	4.64386
Ribo6	BP	GO:0032922	circadian regulation of gene expression	0.04225	4.64386
Ribo6	BP	GO:0048844	artery morphogenesis	0.04225	4.64386
Ribo6	BP	GO:0006885	regulation of pH	0.04225	4.64386
Ribo6	BP	GO:0043525	positive regulation of neuron apoptotic ...	0.04401	4.64386
Ribo6	BP	GO:0033077	T cell differentiation in thymus	0.04401	4.64386
Ribo6	BP	GO:0062014	negative regulation of small molecule me...	0.04928	4.32193
Ribo6	BP	GO:0003151	outflow tract morphogenesis	0.04928	4.32193
Ribo7	BP	GO:0033539	fatty acid beta-oxidation using acyl-CoA...	9.5e-05	5.05889
Ribo7	BP	GO:0009404	toxin metabolic process	0.00031	4.42146
Ribo7	BP	GO:0048208	COPII vesicle coating	0.00313	4.47393
Ribo7	BP	GO:0048532	anatomical structure arrangement	0.00313	4.47393
Ribo7	BP	GO:0015986	ATP synthesis coupled proton transport	0.00619	4.05889
Ribo7	BP	GO:0062033	positive regulation of mitotic sister ch...	0.00619	4.05889
Ribo7	BP	GO:0051865	protein autoubiquitination	0.00666	2.94342
Ribo7	BP	GO:1901021	positive regulation of calcium ion trans...	0.01637	3.32193
Ribo7	BP	GO:1903507	negative regulation of nucleic acid-temp...	0.01783	-0.582556
Ribo7	BP	GO:0043001	Golgi to plasma membrane protein transpo...	0.02069	3.18442
Ribo7	BP	GO:0072665	protein localization to vacuole	0.0253	2.59946
Ribo7	BP	GO:0060402	calcium ion transport into cytosol	0.02541	1.62149
Ribo7	BP	GO:0007517	muscle organ development	0.03055	0.810966
Ribo7	BP	GO:0006446	regulation of translational initiation	0.03164	2.94342
Ribo7	BP	GO:0001676	long-chain fatty acid metabolic process	0.03234	2.8365
Ribo7	BP	GO:2001259	positive regulation of cation channel ac...	0.03991	2.64386
Ribo7	BP	GO:0022900	electron transport chain	0.04193	1.81097
Ribo7	BP	GO:0006635	fatty acid beta-oxidation	0.04677	3.47393
Ribo7	BP	GO:0006357	regulation of transcription by RNA polym...	0.04826	0.0800879
Ribo7	BP	GO:0006091	generation of precursor metabolites and ...	0.0496	1.45403
Ribo7	BP	GO:0098754	detoxification	0.04989	3.12029
Ribo8	BP	GO:0032781	positive regulation of ATPase activity	0.0015	5.05889
Ribo8	BP	GO:0070534	protein K63-linked ubiquitination	0.002	4.8365
Ribo8	BP	GO:0003170	heart valve development	0.0078	4.47393
Ribo8	BP	GO:0001843	neural tube closure	0.0104	3.64386
Ribo8	BP	GO:0007165	signal transduction	0.0115	1.152
Ribo8	BP	GO:0086016	AV node cell action potential	0.0204	5.64386
Ribo8	BP	GO:0006086	acetyl-CoA biosynthetic process from pyr...	0.0204	5.64386
Ribo8	BP	GO:0045906	negative regulation of vasoconstriction	0.0204	5.64386
Ribo8	BP	GO:0003214	cardiac left ventricle morphogenesis	0.0204	5.64386
Ribo8	BP	GO:0010882	regulation of cardiac muscle contraction...	0.0204	5.64386
Ribo8	BP	GO:0051284	positive regulation of sequestering of c...	0.0204	5.64386
Ribo8	BP	GO:0032966	negative regulation of collagen biosynth...	0.0204	5.64386
Ribo8	BP	GO:0003174	mitral valve development	0.0204	5.64386
Ribo8	BP	GO:0032486	Rap protein signal transduction	0.0204	5.64386
Ribo8	BP	GO:0071312	cellular response to alkaloid	0.0204	5.64386
Ribo8	BP	GO:1901841	regulation of high voltage-gated calcium...	0.0224	5.64386
Ribo8	BP	GO:0051481	negative regulation of cytosolic calcium...	0.0224	5.64386
Ribo8	BP	GO:0060413	atrial septum morphogenesis	0.0224	5.64386
Ribo8	BP	GO:0060037	pharyngeal system development	0.0224	5.64386
Ribo8	BP	GO:0032660	regulation of interleukin-17 production	0.0224	5.64386
Ribo8	BP	GO:0045793	positive regulation of cell size	0.0245	5.64386
Ribo8	BP	GO:0060706	cell differentiation involved in embryon...	0.0245	5.64386
Ribo8	BP	GO:1900119	positive regulation of execution phase o...	0.0245	5.64386
Ribo8	BP	GO:1903358	regulation of Golgi organization	0.0245	5.64386
Ribo8	BP	GO:0010155	regulation of proton transport	0.0245	5.64386
Ribo8	BP	GO:2000251	positive regulation of actin cytoskeleto...	0.0245	5.64386
Ribo8	BP	GO:0051895	negative regulation of focal adhesion as...	0.0245	5.64386
Ribo8	BP	GO:0086014	atrial cardiac muscle cell action potent...	0.0245	5.64386
Ribo8	BP	GO:1903779	regulation of cardiac conduction	0.0265	5.05889
Ribo8	BP	GO:0060143	positive regulation of syncytium formati...	0.0265	5.05889
Ribo8	BP	GO:0098911	regulation of ventricular cardiac muscle...	0.0265	5.05889
Ribo8	BP	GO:2000136	regulation of cell proliferation involve...	0.0265	5.05889
Ribo8	BP	GO:0010863	positive regulation of phospholipase C a...	0.0265	5.05889
Ribo8	BP	GO:0033160	positive regulation of protein import in...	0.0265	5.05889
Ribo8	BP	GO:1904427	positive regulation of calcium ion trans...	0.027	4.64386
Ribo8	BP	GO:0001946	lymphangiogenesis	0.0285	5.05889
Ribo8	BP	GO:0060841	venous blood vessel development	0.0285	5.05889
Ribo8	BP	GO:0010880	regulation of release of sequestered cal...	0.0285	5.05889
Ribo8	BP	GO:0001779	natural killer cell differentiation	0.0285	5.05889
Ribo8	BP	GO:0051497	negative regulation of stress fiber asse...	0.0285	5.05889
Ribo8	BP	GO:1901020	negative regulation of calcium ion trans...	0.0285	5.05889
Ribo8	BP	GO:1904424	regulation of GTP binding	0.0285	5.05889
Ribo8	BP	GO:0009593	detection of chemical stimulus	0.0285	5.05889
Ribo8	BP	GO:0010460	positive regulation of heart rate	0.0305	5.05889
Ribo8	BP	GO:1901018	positive regulation of potassium ion tra...	0.0325	5.05889
Ribo8	BP	GO:0001893	maternal placenta development	0.0325	5.05889
Ribo8	BP	GO:0061298	retina vasculature development in camera...	0.0325	5.05889
Ribo8	BP	GO:0046827	positive regulation of protein export fr...	0.0325	5.05889
Ribo8	BP	GO:0033522	histone H2A ubiquitination	0.0325	5.05889
Ribo8	BP	GO:2000780	negative regulation of double-strand bre...	0.0325	5.05889
Ribo8	BP	GO:0016574	histone ubiquitination	0.0327	4.8365
Ribo8	BP	GO:0003085	negative regulation of systemic arterial...	0.0345	4.64386
Ribo8	BP	GO:1902914	regulation of protein polyubiquitination	0.0345	4.64386
Ribo8	BP	GO:0014823	response to activity	0.0345	4.64386
Ribo8	BP	GO:0071870	cellular response to catecholamine stimu...	0.0345	4.64386
Ribo8	BP	GO:0035024	negative regulation of Rho protein signa...	0.0365	4.64386
Ribo8	BP	GO:0003181	atrioventricular valve morphogenesis	0.0365	4.64386
Ribo8	BP	GO:1903077	negative regulation of protein localizat...	0.0365	4.64386
Ribo8	BP	GO:0035994	response to muscle stretch	0.0385	4.64386
Ribo8	BP	GO:2001258	negative regulation of cation channel ac...	0.0385	4.64386
Ribo8	BP	GO:0030501	positive regulation of bone mineralizati...	0.0385	4.64386
Ribo8	BP	GO:0014074	response to purine-containing compound	0.0403	3.94342
Ribo8	BP	GO:0003148	outflow tract septum morphogenesis	0.0405	4.64386
Ribo8	BP	GO:0048841	regulation of axon extension involved in...	0.0424	4.64386
Ribo8	BP	GO:1905314	semi-lunar valve development	0.0424	4.64386
Ribo8	BP	GO:0110111	negative regulation of animal organ morp...	0.0424	4.64386
Ribo8	BP	GO:0007020	microtubule nucleation	0.0424	4.64386
Ribo8	BP	GO:0010862	positive regulation of pathway-restricte...	0.0444	4.32193
Ribo8	BP	GO:0034067	protein localization to Golgi apparatus	0.0464	4.32193
Ribo8	BP	GO:0031116	positive regulation of microtubule polym...	0.0464	4.32193
Ribo8	BP	GO:0030513	positive regulation of BMP signaling pat...	0.0464	4.32193
Ribo8	BP	GO:1901021	positive regulation of calcium ion trans...	0.0464	4.32193
Ribo8	BP	GO:0002026	regulation of the force of heart contrac...	0.0484	4.32193
Ribo8	BP	GO:0006623	protein targeting to vacuole	0.0484	4.32193
Ribo8	BP	GO:0003281	ventricular septum development	0.0496	4.05889
Ribo8	BP	GO:0030509	BMP signaling pathway	0.0497	3.64386
Ribo9	BP	GO:0045945	positive regulation of transcription by ...	1.2e-05	5.90689
Ribo9	BP	GO:0008542	visual learning	0.00056	4.22882
Ribo9	BP	GO:0019941	modification-dependent protein catabolic...	0.00071	1.59219
Ribo9	BP	GO:0051496	positive regulation of stress fiber asse...	0.00084	3.98089
Ribo9	BP	GO:0071230	cellular response to amino acid stimulus	0.00136	3.76939
Ribo9	BP	GO:0045792	negative regulation of cell size	0.00144	5.05889
Ribo9	BP	GO:0090630	activation of GTPase activity	0.00163	3.64386
Ribo9	BP	GO:0000132	establishment of mitotic spindle orienta...	0.00198	4.8365
Ribo9	BP	GO:0048339	paraxial mesoderm development	0.00228	4.8365
Ribo9	BP	GO:0035176	social behavior	0.00259	4.64386
Ribo9	BP	GO:0055007	cardiac muscle cell differentiation	0.00272	2.88897
Ribo9	BP	GO:0060122	inner ear receptor cell stereocilium org...	0.00406	4.32193
Ribo9	BP	GO:0010970	transport along microtubule	0.00451	3.12029
Ribo9	BP	GO:0001822	kidney development	0.00618	2.4344
Ribo9	BP	GO:0071539	protein localization to centrosome	0.00631	4.05889
Ribo9	BP	GO:0016242	negative regulation of macroautophagy	0.00734	3.94342
Ribo9	BP	GO:0072132	mesenchyme morphogenesis	0.00788	3.94342
Ribo9	BP	GO:0021988	olfactory lobe development	0.00938	4.47393
Ribo9	BP	GO:0002292	T cell differentiation involved in immun...	0.00939	3.8365
Ribo9	BP	GO:0036294	cellular response to decreased oxygen le...	0.00944	2.55639
Ribo9	BP	GO:0001707	mesoderm formation	0.01021	3.73697
Ribo9	BP	GO:0043087	regulation of GTPase activity	0.01038	2.65896
Ribo9	BP	GO:0038202	TORC1 signaling	0.01084	3.64386
Ribo9	BP	GO:1905515	non-motile cilium assembly	0.01084	3.64386
Ribo9	BP	GO:0032007	negative regulation of TOR signaling	0.01351	3.47393
Ribo9	BP	GO:0072525	pyridine-containing compound biosyntheti...	0.01377	3.32193
Ribo9	BP	GO:0043666	regulation of phosphoprotein phosphatase...	0.01422	3.47393
Ribo9	BP	GO:0006890	retrograde vesicle-mediated transport, G...	0.01422	3.47393
Ribo9	BP	GO:0006418	tRNA aminoacylation for protein translat...	0.01494	3.39593
Ribo9	BP	GO:0045670	regulation of osteoclast differentiation	0.01643	3.32193
Ribo9	BP	GO:1901214	regulation of neuron death	0.01818	1.94342
Ribo9	BP	GO:0048232	male gamete generation	0.02256	2.25154
Ribo9	BP	GO:0046889	positive regulation of lipid biosyntheti...	0.0257	3
Ribo9	BP	GO:0016239	positive regulation of macroautophagy	0.02663	3
Ribo9	BP	GO:0051881	regulation of mitochondrial membrane pot...	0.02757	2.94342
Ribo9	BP	GO:0090559	regulation of membrane permeability	0.02795	3.32193
Ribo9	BP	GO:0001938	positive regulation of endothelial cell ...	0.0295	2.88897
Ribo9	BP	GO:0051172	negative regulation of nitrogen compound...	0.03198	1.00891
Ribo9	BP	GO:0032885	regulation of polysaccharide biosyntheti...	0.03248	3.94342
Ribo9	BP	GO:0007044	cell-substrate junction assembly	0.03261	2.68966
Ribo9	BP	GO:0042147	retrograde transport, endosome to Golgi	0.03453	2.78588
Ribo9	BP	GO:0045859	regulation of protein kinase activity	0.03493	1.06643
Ribo9	BP	GO:0021761	limbic system development	0.03707	3.47393
Ribo9	BP	GO:0030838	positive regulation of actin filament po...	0.03987	2.64386
Ribo9	BP	GO:0030183	B cell differentiation	0.04097	2.64386
Ribo9	BP	GO:0060271	cilium assembly	0.04441	3.01159
Ribo9	BP	GO:0001736	establishment of planar polarity	0.04609	3.64386
Ribo9	BP	GO:0035313	wound healing, spreading of epidermal ce...	0.04707	4.32193
Ribo9	BP	GO:0051547	regulation of keratinocyte migration	0.04707	4.32193
Ribo9	BP	GO:0032107	regulation of response to nutrient level...	0.04707	4.32193
Ribo9	BP	GO:2000479	regulation of cAMP-dependent protein kin...	0.04707	4.32193
Ribo9	BP	GO:0008298	intracellular mRNA localization	0.04707	4.32193
Ribo9	BP	GO:0031268	pseudopodium organization	0.04707	4.32193
Ribo9	BP	GO:0090335	regulation of brown fat cell differentia...	0.04707	4.32193
Ribo9	BP	GO:0002093	auditory receptor cell morphogenesis	0.04707	4.32193
Ribo9	BP	GO:0051131	chaperone-mediated protein complex assem...	0.04707	4.32193
Ribo9	BP	GO:0014072	response to isoquinoline alkaloid	0.04707	4.32193
Ribo9	BP	GO:0006206	pyrimidine nucleobase metabolic process	0.04707	4.32193
Ribo9	BP	GO:0031145	anaphase-promoting complex-dependent cat...	0.04707	4.32193
Ribo9	BP	GO:0007283	spermatogenesis	0.04779	1.87127
Ribo10	BP	GO:0045742	positive regulation of epidermal growth ...	0.0019	4.8365
Ribo10	BP	GO:0048730	epidermis morphogenesis	0.0019	4.8365
Ribo10	BP	GO:0060216	definitive hemopoiesis	0.0022	4.8365
Ribo10	BP	GO:0030048	actin filament-based movement	0.0026	3.25154
Ribo10	BP	GO:0006541	glutamine metabolic process	0.0032	4.47393
Ribo10	BP	GO:1901607	alpha-amino acid biosynthetic process	0.0043	3.98089
Ribo10	BP	GO:0051271	negative regulation of cellular componen...	0.0051	2
Ribo10	BP	GO:0043388	positive regulation of DNA binding	0.0077	3.8365
Ribo10	BP	GO:0050905	neuromuscular process	0.0095	3.27462
Ribo10	BP	GO:1903506	regulation of nucleic acid-templated tra...	0.0108	-0.38773
Ribo10	BP	GO:0099518	vesicle cytoskeletal trafficking	0.0112	3.64386
Ribo10	BP	GO:0045773	positive regulation of axon extension	0.0133	3.47393
Ribo10	BP	GO:0018393	internal peptidyl-lysine acetylation	0.0145	2.44746
Ribo10	BP	GO:0006023	aminoglycan biosynthetic process	0.0147	3.73697
Ribo10	BP	GO:0038127	ERBB signaling pathway	0.0192	3.05889
Ribo10	BP	GO:1903115	regulation of actin filament-based movem...	0.0196	3.47393
Ribo10	BP	GO:0030334	regulation of cell migration	0.0235	1.09954
Ribo10	BP	GO:0007015	actin filament organization	0.0239	1.87832
Ribo10	BP	GO:0043966	histone H3 acetylation	0.0251	3
Ribo10	BP	GO:0033619	membrane protein proteolysis	0.0293	3.55639
Ribo10	BP	GO:0051726	regulation of cell cycle	0.0312	0.463947
Ribo10	BP	GO:0032507	maintenance of protein location in cell	0.0321	2.8365
Ribo10	BP	GO:0022607	cellular component assembly	0.0452	0.731822
Ribo10	BP	GO:0030154	cell differentiation	0.0465	0.357032
Ribo10	BP	GO:0050982	detection of mechanical stimulus	0.0482	4.32193
Ribo10	BP	GO:0042119	neutrophil activation	0.0493	4.32193
Ribo10	BP	GO:0006206	pyrimidine nucleobase metabolic process	0.0493	4.32193
Ribo10	BP	GO:0008356	asymmetric cell division	0.0493	4.32193
Ribo10	BP	GO:0009218	pyrimidine ribonucleotide metabolic proc...	0.0493	4.32193
Ribo10	BP	GO:0031953	negative regulation of protein autophosp...	0.0493	4.32193
Ribo10	BP	GO:0050974	detection of mechanical stimulus involve...	0.0493	4.32193
Ribo10	BP	GO:0010644	cell communication by electrical couplin...	0.0493	4.32193
Ribo10	BP	GO:1904294	positive regulation of ERAD pathway	0.0493	4.32193
Ribo10	BP	GO:0050650	chondroitin sulfate proteoglycan biosynt...	0.0493	4.32193
Ribo10	BP	GO:0060347	heart trabecula formation	0.0493	4.32193
Ribo11	BP	GO:0045653	negative regulation of megakaryocyte dif...	0.016	5.64386
Ribo11	BP	GO:0003418	growth plate cartilage chondrocyte diffe...	0.017	5.64386
Ribo11	BP	GO:1904181	positive regulation of membrane depolari...	0.017	5.64386
Ribo11	BP	GO:0032461	positive regulation of protein oligomeri...	0.019	5.64386
Ribo11	BP	GO:0000028	ribosomal small subunit assembly	0.019	5.64386
Ribo11	BP	GO:0032462	regulation of protein homooligomerizatio...	0.021	5.64386
Ribo11	BP	GO:0003161	cardiac conduction system development	0.022	5.64386
Ribo11	BP	GO:0006335	DNA replication-dependent nucleosome ass...	0.022	5.64386
Ribo11	BP	GO:0050765	negative regulation of phagocytosis	0.022	5.64386
Ribo11	BP	GO:0001516	prostaglandin biosynthetic process	0.022	5.64386
Ribo11	BP	GO:0051900	regulation of mitochondrial depolarizati...	0.024	5.64386
Ribo11	BP	GO:0043171	peptide catabolic process	0.025	5.05889
Ribo11	BP	GO:1903204	negative regulation of oxidative stress-...	0.027	5.05889
Ribo11	BP	GO:1903206	negative regulation of hydrogen peroxide...	0.027	5.05889
Ribo11	BP	GO:0006336	DNA replication-independent nucleosome a...	0.027	5.05889
Ribo11	BP	GO:0071398	cellular response to fatty acid	0.032	5.05889
Ribo11	BP	GO:0051560	mitochondrial calcium ion homeostasis	0.032	5.05889
Ribo11	BP	GO:0010499	proteasomal ubiquitin-independent protei...	0.033	5.05889
Ribo11	BP	GO:0033137	negative regulation of peptidyl-serine p...	0.035	4.64386
Ribo11	BP	GO:0002067	glandular epithelial cell differentiatio...	0.036	4.64386
Ribo11	BP	GO:0009058	biosynthetic process	0.037	0.077041
Ribo11	BP	GO:2000242	negative regulation of reproductive proc...	0.038	4.64386
Ribo11	BP	GO:0043001	Golgi to plasma membrane protein transpo...	0.041	4.64386
Ribo11	BP	GO:0000462	maturation of SSU-rRNA from tricistronic...	0.041	4.64386
Ribo11	BP	GO:0051290	protein heterotetramerization	0.044	4.64386
Ribo11	BP	GO:0071236	cellular response to antibiotic	0.044	3.8365
Ribo11	BP	GO:0061061	muscle structure development	0.044	1.47393
Ribo11	BP	GO:0001755	neural crest cell migration	0.046	4.32193
Ribo11	BP	GO:0030850	prostate gland development	0.047	4.32193
Ribo11	BP	GO:0051898	negative regulation of protein kinase B ...	0.049	4.32193
Ribo12	BP	GO:0006829	zinc ion transport	0.00053	4.22882
Ribo12	BP	GO:0006334	nucleosome assembly	0.00123	3.22882
Ribo12	BP	GO:0035335	peptidyl-tyrosine dephosphorylation	0.0017	3.64386
Ribo12	BP	GO:0042059	negative regulation of epidermal growth ...	0.00499	3.76939
Ribo12	BP	GO:0002861	regulation of inflammatory response to a...	0.00508	4.18442
Ribo12	BP	GO:0031936	negative regulation of chromatin silenci...	0.00508	4.18442
Ribo12	BP	GO:0090026	positive regulation of monocyte chemotax...	0.00508	4.18442
Ribo12	BP	GO:0016584	nucleosome positioning	0.00616	4.05889
Ribo12	BP	GO:1902042	negative regulation of extrinsic apoptot...	0.00861	3.8365
Ribo12	BP	GO:0055012	ventricular cardiac muscle cell differen...	0.00861	3.8365
Ribo12	BP	GO:0006882	cellular zinc ion homeostasis	0.00861	3.8365
Ribo12	BP	GO:0097062	dendritic spine maintenance	0.00861	3.8365
Ribo12	BP	GO:0006335	DNA replication-dependent nucleosome ass...	0.00998	3.73697
Ribo12	BP	GO:0043094	cellular metabolic compound salvage	0.00998	3.73697
Ribo12	BP	GO:0050765	negative regulation of phagocytosis	0.00998	3.73697
Ribo12	BP	GO:1901185	negative regulation of ERBB signaling pa...	0.01067	4.12029
Ribo12	BP	GO:0198738	cell-cell signaling by wnt	0.01095	0.572394
Ribo12	BP	GO:1904646	cellular response to amyloid-beta	0.0146	3.39593
Ribo12	BP	GO:0002478	antigen processing and presentation of e...	0.0163	3.32193
Ribo12	BP	GO:0032801	receptor catabolic process	0.01809	3.25154
Ribo12	BP	GO:2000352	negative regulation of endothelial cell ...	0.01996	3.18442
Ribo12	BP	GO:1905897	regulation of response to endoplasmic re...	0.02155	2.16273
Ribo12	BP	GO:0002888	positive regulation of myeloid leukocyte...	0.02191	3.12029
Ribo12	BP	GO:0033628	regulation of cell adhesion mediated by ...	0.02191	3.12029
Ribo12	BP	GO:0060968	regulation of gene silencing	0.02315	2.81097
Ribo12	BP	GO:0010951	negative regulation of endopeptidase act...	0.02372	1.92504
Ribo12	BP	GO:0030261	chromosome condensation	0.02602	3
Ribo12	BP	GO:0048536	spleen development	0.03042	2.88897
Ribo12	BP	GO:0055013	cardiac muscle cell development	0.03187	2.12029
Ribo12	BP	GO:0010677	negative regulation of cellular carbohyd...	0.03272	2.78588
Ribo12	BP	GO:0045910	negative regulation of DNA recombination	0.03272	2.78588
Ribo12	BP	GO:0007080	mitotic metaphase plate congression	0.03509	2.73697
Ribo12	BP	GO:0016242	negative regulation of macroautophagy	0.03509	2.73697
Ribo12	BP	GO:0051290	protein heterotetramerization	0.03753	2.68966
Ribo12	BP	GO:0032091	negative regulation of protein binding	0.03857	2
Ribo12	BP	GO:1902410	mitotic cytokinetic process	0.04286	3.39593
Ribo12	BP	GO:0045576	mast cell activation	0.04293	2.55639
Ribo12	BP	GO:0009156	ribonucleoside monophosphate biosyntheti...	0.04328	0.810966
Ribo12	BP	GO:0010634	positive regulation of epithelial cell m...	0.0442	1.78588
Ribo12	BP	GO:0006998	nuclear envelope organization	0.0452	2.55639
Ribo12	BP	GO:0006911	phagocytosis, engulfment	0.0452	2.55639
Ribo12	BP	GO:0032456	endocytic recycling	0.0452	2.55639
Ribo13	BP	GO:0010499	proteasomal ubiquitin-independent protei...	0.00049	6.05889
Ribo13	BP	GO:0009167	purine ribonucleoside monophosphate meta...	0.00757	2.78588
Ribo13	BP	GO:0070374	positive regulation of ERK1 and ERK2 cas...	0.0148	3.39593
Ribo13	BP	GO:0006086	acetyl-CoA biosynthetic process from pyr...	0.01592	5.64386
Ribo13	BP	GO:0045136	development of secondary sexual characte...	0.01592	5.64386
Ribo13	BP	GO:0060749	mammary gland alveolus development	0.01592	5.64386
Ribo13	BP	GO:0036336	dendritic cell migration	0.01592	5.64386
Ribo13	BP	GO:0006958	complement activation, classical pathway	0.01592	5.64386
Ribo13	BP	GO:0039535	regulation of RIG-I signaling pathway	0.01592	5.64386
Ribo13	BP	GO:0009164	nucleoside catabolic process	0.01592	5.64386
Ribo13	BP	GO:0032689	negative regulation of interferon-gamma ...	0.0175	5.64386
Ribo13	BP	GO:1903010	regulation of bone development	0.0175	5.64386
Ribo13	BP	GO:0036295	cellular response to increased oxygen le...	0.0175	5.64386
Ribo13	BP	GO:0051171	regulation of nitrogen compound metaboli...	0.01855	-0.195348
Ribo13	BP	GO:0033599	regulation of mammary gland epithelial c...	0.01907	5.64386
Ribo13	BP	GO:0002920	regulation of humoral immune response	0.02065	5.64386
Ribo13	BP	GO:0006144	purine nucleobase metabolic process	0.02065	5.64386
Ribo13	BP	GO:0045672	positive regulation of osteoclast differ...	0.02065	5.64386
Ribo13	BP	GO:0055114	oxidation-reduction process	0.02131	2.074
Ribo13	BP	GO:0045780	positive regulation of bone resorption	0.02222	5.64386
Ribo13	BP	GO:0015986	ATP synthesis coupled proton transport	0.02222	5.64386
Ribo13	BP	GO:0015991	ATP hydrolysis coupled proton transport	0.02379	5.64386
Ribo13	BP	GO:0090023	positive regulation of neutrophil chemot...	0.02379	5.64386
Ribo13	BP	GO:0070131	positive regulation of mitochondrial tra...	0.02535	5.05889
Ribo13	BP	GO:0009154	purine ribonucleotide catabolic process	0.02535	5.05889
Ribo13	BP	GO:0050687	negative regulation of defense response ...	0.02535	5.05889
Ribo13	BP	GO:0008219	cell death	0.02597	1.03653
Ribo13	BP	GO:0010458	exit from mitosis	0.02692	5.05889
Ribo13	BP	GO:0060444	branching involved in mammary gland duct...	0.02848	5.05889
Ribo13	BP	GO:0031326	regulation of cellular biosynthetic proc...	0.02969	-0.0749621
Ribo13	BP	GO:0006783	heme biosynthetic process	0.03004	5.05889
Ribo13	BP	GO:0030224	monocyte differentiation	0.03004	5.05889
Ribo13	BP	GO:0048025	negative regulation of mRNA splicing, vi...	0.0316	5.05889
Ribo13	BP	GO:0045851	pH reduction	0.03315	5.05889
Ribo13	BP	GO:0033146	regulation of intracellular estrogen rec...	0.03315	5.05889
Ribo13	BP	GO:0032655	regulation of interleukin-12 production	0.03626	4.64386
Ribo13	BP	GO:0007588	excretion	0.03626	4.64386
Ribo13	BP	GO:0098751	bone cell development	0.03781	4.64386
Ribo13	BP	GO:0002673	regulation of acute inflammatory respons...	0.03935	4.64386
Ribo13	BP	GO:0033144	negative regulation of intracellular ste...	0.03935	4.64386
Ribo13	BP	GO:1901068	guanosine-containing compound metabolic ...	0.0409	4.64386
Ribo13	BP	GO:0006099	tricarboxylic acid cycle	0.0409	4.64386
Ribo13	BP	GO:1900026	positive regulation of substrate adhesio...	0.04398	4.64386
Ribo13	BP	GO:0060688	regulation of morphogenesis of a branchi...	0.04551	4.32193
Ribo13	BP	GO:0000060	protein import into nucleus, translocati...	0.04705	4.32193
Ribo13	BP	GO:0007566	embryo implantation	0.04705	4.32193
Ribo13	BP	GO:1902808	positive regulation of cell cycle G1/S p...	0.04705	4.32193
Ribo13	BP	GO:0042771	intrinsic apoptotic signaling pathway in...	0.04858	4.32193
Ribo14	BP	GO:0030433	ubiquitin-dependent ERAD pathway	0.0011	2.68038
Ribo14	BP	GO:0007029	endoplasmic reticulum organization	0.0036	2.66658
Ribo14	BP	GO:1901998	toxin transport	0.0064	2.98089
Ribo14	BP	GO:0032233	positive regulation of actin filament bu...	0.0072	2.07907
Ribo14	BP	GO:0006612	protein targeting to membrane	0.0084	2.4112
Ribo14	BP	GO:0098885	modification of postsynaptic actin cytos...	0.009	3.73697
Ribo14	BP	GO:0009109	coenzyme catabolic process	0.009	3.73697
Ribo14	BP	GO:1901881	positive regulation of protein depolymer...	0.009	3.73697
Ribo14	BP	GO:0070200	establishment of protein localization to...	0.009	3.73697
Ribo14	BP	GO:0045047	protein targeting to ER	0.0108	3.14136
Ribo14	BP	GO:0070841	inclusion body assembly	0.013	3.47393
Ribo14	BP	GO:2001170	negative regulation of ATP biosynthetic ...	0.013	3.47393
Ribo14	BP	GO:0097201	negative regulation of transcription fro...	0.013	3.47393
Ribo14	BP	GO:0009991	response to extracellular stimulus	0.0149	-0.0565835
Ribo14	BP	GO:0097062	dendritic spine maintenance	0.0152	3.39593
Ribo14	BP	GO:0008360	regulation of cell shape	0.0187	1.699
Ribo14	BP	GO:1902905	positive regulation of supramolecular fi...	0.0216	1.70974
Ribo14	BP	GO:0070252	actin-mediated cell contraction	0.0226	1.59946
Ribo14	BP	GO:0051205	protein insertion into membrane	0.0227	3.05889
Ribo14	BP	GO:0097106	postsynaptic density organization	0.0227	3.05889
Ribo14	BP	GO:0034605	cellular response to heat	0.0253	2.25154
Ribo14	BP	GO:0001754	eye photoreceptor cell differentiation	0.0255	3
Ribo14	BP	GO:0051495	positive regulation of cytoskeleton orga...	0.03	1.62466
Ribo14	BP	GO:0010035	response to inorganic substance	0.0307	0.885157
Ribo14	BP	GO:0048013	ephrin receptor signaling pathway	0.0314	2.8365
Ribo14	BP	GO:0051457	maintenance of protein location in nucle...	0.0314	2.8365
Ribo14	BP	GO:0032968	positive regulation of transcription elo...	0.0346	2.73697
Ribo14	BP	GO:0007020	microtubule nucleation	0.0378	2.68966
Ribo14	BP	GO:0002082	regulation of oxidative phosphorylation	0.0378	2.68966
Ribo14	BP	GO:0060999	positive regulation of dendritic spine d...	0.0408	2.42146
Ribo14	BP	GO:2001171	positive regulation of ATP biosynthetic ...	0.0412	2.64386
Ribo14	BP	GO:0051085	chaperone cofactor-dependent protein ref...	0.0412	2.64386
Ribo14	BP	GO:0099010	modification of postsynaptic structure	0.043	3.58496
Ribo14	BP	GO:0009185	ribonucleoside diphosphate metabolic pro...	0.0436	1.1047
Ribo14	BP	GO:0014020	primary neural tube formation	0.0437	0.773491
Ribo14	BP	GO:0009914	hormone transport	0.0441	-0.214125
Ribo14	BP	GO:1901216	positive regulation of neuron death	0.0481	1.47393
Ribo14	BP	GO:1903432	regulation of TORC1 signaling	0.0483	2.51457
Ribo15	BP	GO:0042178	xenobiotic catabolic process	0.015	6.64386
Ribo15	BP	GO:0010738	regulation of protein kinase A signaling	0.015	6.64386
Ribo15	BP	GO:0034982	mitochondrial protein processing	0.016	5.64386
Ribo15	BP	GO:0051481	negative regulation of cytosolic calcium...	0.016	5.64386
Ribo15	BP	GO:0072537	fibroblast activation	0.016	5.64386
Ribo15	BP	GO:0006264	mitochondrial DNA replication	0.018	5.64386
Ribo15	BP	GO:2000353	positive regulation of endothelial cell ...	0.019	5.64386
Ribo15	BP	GO:0042407	cristae formation	0.019	5.64386
Ribo15	BP	GO:0044331	cell-cell adhesion mediated by cadherin	0.021	5.64386
Ribo15	BP	GO:0085029	extracellular matrix assembly	0.024	5.64386
Ribo15	BP	GO:0033233	regulation of protein sumoylation	0.024	5.64386
Ribo15	BP	GO:1903055	positive regulation of extracellular mat...	0.025	5.05889
Ribo15	BP	GO:0030317	flagellated sperm motility	0.025	5.05889
Ribo15	BP	GO:0010458	exit from mitosis	0.025	5.05889
Ribo15	BP	GO:0006956	complement activation	0.028	5.05889
Ribo15	BP	GO:0070296	sarcoplasmic reticulum calcium ion trans...	0.028	5.05889
Ribo15	BP	GO:0045746	negative regulation of Notch signaling p...	0.029	5.05889
Ribo15	BP	GO:0032967	positive regulation of collagen biosynth...	0.029	5.05889
Ribo15	BP	GO:0051560	mitochondrial calcium ion homeostasis	0.029	5.05889
Ribo15	BP	GO:0033363	secretory granule organization	0.031	5.05889
Ribo15	BP	GO:0070584	mitochondrion morphogenesis	0.031	5.05889
Ribo15	BP	GO:0060986	endocrine hormone secretion	0.032	5.05889
Ribo15	BP	GO:0090279	regulation of calcium ion import	0.034	5.05889
Ribo15	BP	GO:0043537	negative regulation of blood vessel endo...	0.035	4.64386
Ribo15	BP	GO:0045839	negative regulation of mitotic nuclear d...	0.037	4.64386
Ribo15	BP	GO:0071158	positive regulation of cell cycle arrest	0.037	4.64386
Ribo15	BP	GO:0001658	branching involved in ureteric bud morph...	0.037	4.64386
Ribo15	BP	GO:0001937	negative regulation of endothelial cell ...	0.038	4.64386
Ribo15	BP	GO:0050710	negative regulation of cytokine secretio...	0.039	4.64386
Ribo15	BP	GO:0010718	positive regulation of epithelial to mes...	0.044	4.64386
Ribo15	BP	GO:0045840	positive regulation of mitotic nuclear d...	0.047	4.32193
Ribo16	BP	GO:0006099	tricarboxylic acid cycle	2.3e-05	3.79586
Ribo16	BP	GO:0032981	mitochondrial respiratory chain complex ...	0.0002	3.18442
Ribo16	BP	GO:0043248	proteasome assembly	0.00065	4.05889
Ribo16	BP	GO:0022900	electron transport chain	0.00179	2.13606
Ribo16	BP	GO:0030163	protein catabolic process	0.0054	0.719892
Ribo16	BP	GO:0061157	mRNA destabilization	0.00624	3.22882
Ribo16	BP	GO:0051726	regulation of cell cycle	0.00632	0.477579
Ribo16	BP	GO:0031115	negative regulation of microtubule polym...	0.00949	3.73697
Ribo16	BP	GO:0070534	protein K63-linked ubiquitination	0.01021	2.73697
Ribo16	BP	GO:0007031	peroxisome organization	0.01114	2.98089
Ribo16	BP	GO:0043518	negative regulation of DNA damage respon...	0.01322	3.47393
Ribo16	BP	GO:0034389	lipid droplet organization	0.01322	3.47393
Ribo16	BP	GO:1903779	regulation of cardiac conduction	0.01322	3.47393
Ribo16	BP	GO:0034219	carbohydrate transmembrane transport	0.01361	1.75309
Ribo16	BP	GO:1905710	positive regulation of membrane permeabi...	0.01365	2.78588
Ribo16	BP	GO:0032482	Rab protein signal transduction	0.01398	2.55639
Ribo16	BP	GO:0006622	protein targeting to lysosome	0.01748	3.25154
Ribo16	BP	GO:0045948	positive regulation of translational ini...	0.01748	3.25154
Ribo16	BP	GO:0006103	2-oxoglutarate metabolic process	0.0198	3.18442
Ribo16	BP	GO:0090502	RNA phosphodiester bond hydrolysis, endo...	0.0198	3.18442
Ribo16	BP	GO:0048169	regulation of long-term neuronal synapti...	0.0198	3.18442
Ribo16	BP	GO:0070861	regulation of protein exit from endoplas...	0.02224	3.12029
Ribo16	BP	GO:0048026	positive regulation of mRNA splicing, vi...	0.02224	3.12029
Ribo16	BP	GO:1902914	regulation of protein polyubiquitination	0.02224	3.12029
Ribo16	BP	GO:0006120	mitochondrial electron transport, NADH t...	0.02224	3.12029
Ribo16	BP	GO:0000466	maturation of 5.8S rRNA from tricistroni...	0.0248	3
Ribo16	BP	GO:0000469	cleavage involved in rRNA processing	0.0248	3
Ribo16	BP	GO:0006767	water-soluble vitamin metabolic process	0.0248	3
Ribo16	BP	GO:0010165	response to X-ray	0.0248	3
Ribo16	BP	GO:0016578	histone deubiquitination	0.0248	3
Ribo16	BP	GO:0010955	negative regulation of protein processin...	0.03025	2.88897
Ribo16	BP	GO:0070207	protein homotrimerization	0.03025	2.88897
Ribo16	BP	GO:0006734	NADH metabolic process	0.03613	2.73697
Ribo16	BP	GO:0070536	protein K63-linked deubiquitination	0.03613	2.73697
Ribo16	BP	GO:0006637	acyl-CoA metabolic process	0.03829	2.4344
Ribo16	BP	GO:0042073	intraciliary transport	0.03922	2.64386
Ribo16	BP	GO:0051289	protein homotetramerization	0.03955	1.98089
Ribo16	BP	GO:0051170	import into nucleus	0.04018	1.25154
Ribo16	BP	GO:2000117	negative regulation of cysteine-type end...	0.04053	1.53533
Ribo16	BP	GO:0010667	negative regulation of cardiac muscle ce...	0.0457	2.55639
Ribo16	BP	GO:0000462	maturation of SSU-rRNA from tricistronic...	0.04907	2.47393
Ribo16	BP	GO:0032435	negative regulation of proteasomal ubiqu...	0.04907	2.47393
Ribo17	BP	GO:0000381	regulation of alternative mRNA splicing,...	0.00015	3.26534
Ribo17	BP	GO:0060338	regulation of type I interferon-mediated...	0.00044	4.22882
Ribo17	BP	GO:0032482	Rab protein signal transduction	0.00096	3.18442
Ribo17	BP	GO:0043524	negative regulation of neuron apoptotic ...	0.00131	2.30996
Ribo17	BP	GO:0046883	regulation of hormone secretion	0.00286	1.36773
Ribo17	BP	GO:0051303	establishment of chromosome localization	0.00371	2.91594
Ribo17	BP	GO:0042742	defense response to bacterium	0.00383	2.47393
Ribo17	BP	GO:0036295	cellular response to increased oxygen le...	0.00733	3.94342
Ribo17	BP	GO:0051258	protein polymerization	0.00734	0.855954
Ribo17	BP	GO:0050663	cytokine secretion	0.00826	2.32193
Ribo17	BP	GO:0048662	negative regulation of smooth muscle cel...	0.00835	2.8365
Ribo17	BP	GO:0006457	protein folding	0.00892	2.14136
Ribo17	BP	GO:0006886	intracellular protein transport	0.00976	1.17673
Ribo17	BP	GO:0010893	positive regulation of steroid biosynthe...	0.01024	3.64386
Ribo17	BP	GO:0045723	positive regulation of fatty acid biosyn...	0.01024	3.64386
Ribo17	BP	GO:1904925	positive regulation of autophagy of mito...	0.01024	3.64386
Ribo17	BP	GO:1901863	positive regulation of muscle tissue dev...	0.01198	1.51457
Ribo17	BP	GO:0110110	positive regulation of animal organ morp...	0.01207	2.64386
Ribo17	BP	GO:0006906	vesicle fusion	0.01265	2.53533
Ribo17	BP	GO:1901524	regulation of mitophagy	0.01357	3.47393
Ribo17	BP	GO:2001025	positive regulation of response to drug	0.01538	3.39593
Ribo17	BP	GO:1903020	positive regulation of glycoprotein meta...	0.01538	3.39593
Ribo17	BP	GO:0010800	positive regulation of peptidyl-threonin...	0.0173	3.32193
Ribo17	BP	GO:0014823	response to activity	0.0173	3.32193
Ribo17	BP	GO:0032042	mitochondrial DNA metabolic process	0.01931	3.18442
Ribo17	BP	GO:0051384	response to glucocorticoid	0.02114	2.52838
Ribo17	BP	GO:0045292	mRNA cis splicing, via spliceosome	0.02361	3.05889
Ribo17	BP	GO:0072606	interleukin-8 secretion	0.02369	3.8365
Ribo17	BP	GO:1903506	regulation of nucleic acid-templated tra...	0.02409	0.0198785
Ribo17	BP	GO:0016239	positive regulation of macroautophagy	0.0256	2.22882
Ribo17	BP	GO:0006376	mRNA splice site selection	0.02589	3
Ribo17	BP	GO:0016192	vesicle-mediated transport	0.02818	0.624265
Ribo17	BP	GO:0002833	positive regulation of response to bioti...	0.02826	2.94342
Ribo17	BP	GO:0043457	regulation of cellular respiration	0.03072	2.8365
Ribo17	BP	GO:0030857	negative regulation of epithelial cell d...	0.03072	2.8365
Ribo17	BP	GO:0006310	DNA recombination	0.03224	1.67116
Ribo17	BP	GO:0001961	positive regulation of cytokine-mediated...	0.03325	2.78588
Ribo17	BP	GO:0045940	positive regulation of steroid metabolic...	0.03501	3.98089
Ribo17	BP	GO:0039529	RIG-I signaling pathway	0.03533	3.64386
Ribo17	BP	GO:0009124	nucleoside monophosphate biosynthetic pr...	0.03537	1.21759
Ribo17	BP	GO:0051653	spindle localization	0.03538	2.73697
Ribo17	BP	GO:0072522	purine-containing compound biosynthetic ...	0.03557	0.68966
Ribo17	BP	GO:0001658	branching involved in ureteric bud morph...	0.03586	2.73697
Ribo17	BP	GO:1900087	positive regulation of G1/S transition o...	0.03855	2.68966
Ribo17	BP	GO:0043001	Golgi to plasma membrane protein transpo...	0.03855	2.68966
Ribo17	BP	GO:0007080	mitotic metaphase plate congression	0.04132	2.64386
Ribo17	BP	GO:0002699	positive regulation of immune effector p...	0.04266	1.85726
Ribo17	BP	GO:0030032	lamellipodium assembly	0.04363	2.20645
Ribo17	BP	GO:0007099	centriole replication	0.04684	3.39593
Ribo17	BP	GO:0019068	virion assembly	0.04686	3.12029
Ribo17	BP	GO:0010517	regulation of phospholipase activity	0.0469	2.55639
Ribo17	BP	GO:0046854	phosphatidylinositol phosphorylation	0.04706	2.51457
Ribo17	BP	GO:0072507	divalent inorganic cation homeostasis	0.04707	0.551099
Ribo17	BP	GO:0007018	microtubule-based movement	0.04717	1.00965
Ribo17	BP	GO:0010595	positive regulation of endothelial cell ...	0.04879	2.152
Ribo1	MF	GO:0030020	extracellular matrix structural constitu...	5.2e-06	3.67423
Ribo1	MF	GO:0005201	extracellular matrix structural constitu...	0.00044	2.77444
Ribo1	MF	GO:0050840	extracellular matrix binding	0.00076	2.8365
Ribo1	MF	GO:0048407	platelet-derived growth factor binding	0.00109	3.76939
Ribo1	MF	GO:0005109	frizzled binding	0.00344	3.27462
Ribo1	MF	GO:0031435	mitogen-activated protein kinase kinase ...	0.00487	3.09954
Ribo1	MF	GO:0043425	bHLH transcription factor binding	0.00661	2.94342
Ribo1	MF	GO:0005518	collagen binding	0.01053	2.21759
Ribo1	MF	GO:0004930	G protein-coupled receptor activity	0.01507	1.84684
Ribo1	MF	GO:0042056	chemoattractant activity	0.01551	3.32193
Ribo1	MF	GO:0004435	phosphatidylinositol phospholipase C act...	0.01551	3.32193
Ribo1	MF	GO:0008083	growth factor activity	0.01861	1.97143
Ribo1	MF	GO:0070888	E-box binding	0.02041	2.34618
Ribo1	MF	GO:0005520	insulin-like growth factor binding	0.02198	2.80255
Ribo1	MF	GO:0005161	platelet-derived growth factor receptor ...	0.02218	3.05889
Ribo1	MF	GO:0042813	Wnt-activated receptor activity	0.02218	3.05889
Ribo1	MF	GO:0004714	transmembrane receptor protein tyrosine ...	0.02227	2.29808
Ribo1	MF	GO:0042605	peptide antigen binding	0.02588	3
Ribo1	MF	GO:0015026	coreceptor activity	0.02588	3
Ribo1	MF	GO:0046982	protein heterodimerization activity	0.02764	0.900144
Ribo1	MF	GO:0004672	protein kinase activity	0.03216	0.619472
Ribo1	MF	GO:0050780	dopamine receptor binding	0.03831	2.68966
Ribo1	MF	GO:0005509	calcium ion binding	0.03959	0.91866
Ribo1	MF	GO:0004298	threonine-type endopeptidase activity	0.04287	2.59946
Ribo1	MF	GO:0030165	PDZ domain binding	0.04411	1.58857
Ribo2	MF	GO:0042288	MHC class I protein binding	0.0056	4.18442
Ribo2	MF	GO:0035014	phosphatidylinositol 3-kinase regulator ...	0.0066	4.05889
Ribo2	MF	GO:0034236	protein kinase A catalytic subunit bindi...	0.0066	4.05889
Ribo2	MF	GO:0035925	mRNA 3'-UTR AU-rich region binding	0.0076	3.94342
Ribo2	MF	GO:0097718	disordered domain specific binding	0.0201	3.18442
Ribo2	MF	GO:0030020	extracellular matrix structural constitu...	0.0218	3.12029
Ribo2	MF	GO:0042626	ATPase activity, coupled to transmembran...	0.0304	2.14136
Ribo2	MF	GO:0035591	signaling adaptor activity	0.0311	2.8365
Ribo2	MF	GO:1990841	promoter-specific chromatin binding	0.0331	2.78588
Ribo2	MF	GO:0004714	transmembrane receptor protein tyrosine ...	0.0352	2.73697
Ribo2	MF	GO:0043531	ADP binding	0.044	2.55639
Ribo3	MF	GO:0005125	cytokine activity	0.012	3.55639
Ribo3	MF	GO:0008083	growth factor activity	0.021	3.18442
Ribo3	MF	GO:0048029	monosaccharide binding	0.022	3.12029
Ribo3	MF	GO:0061630	ubiquitin protein ligase activity	0.025	2.22882
Ribo3	MF	GO:0015295	solute:proton symporter activity	0.042	4.64386
Ribo3	MF	GO:0031005	filamin binding	0.042	4.64386
Ribo3	MF	GO:0106019	phosphatidylinositol-4,5-bisphosphate ph...	0.042	4.64386
Ribo3	MF	GO:0004623	phospholipase A2 activity	0.046	4.32193
Ribo3	MF	GO:0098632	cell-cell adhesion mediator activity	0.046	4.32193
Ribo4	MF	GO:0005509	calcium ion binding	1e-12	2.57777
Ribo4	MF	GO:0005201	extracellular matrix structural constitu...	5.6e-10	3.17437
Ribo4	MF	GO:0008201	heparin binding	1.9e-05	2.78588
Ribo4	MF	GO:0004867	serine-type endopeptidase inhibitor acti...	2.3e-05	3.79586
Ribo4	MF	GO:0004714	transmembrane receptor protein tyrosine ...	8.4e-05	3.44222
Ribo4	MF	GO:0043394	proteoglycan binding	0.00015	3.8365
Ribo4	MF	GO:0005518	collagen binding	0.00046	2.94342
Ribo4	MF	GO:0001968	fibronectin binding	0.00054	3.35845
Ribo4	MF	GO:0001848	complement binding	0.00064	4.05889
Ribo4	MF	GO:0001540	amyloid-beta binding	0.00095	3.152
Ribo4	MF	GO:0030414	peptidase inhibitor activity	0.00121	3.12928
Ribo4	MF	GO:0045499	chemorepellent activity	0.00188	3.58496
Ribo4	MF	GO:0017046	peptide hormone binding	0.00223	3.47393
Ribo4	MF	GO:0004180	carboxypeptidase activity	0.00305	3.32193
Ribo4	MF	GO:0015459	potassium channel regulator activity	0.00518	3.05889
Ribo4	MF	GO:0016504	peptidase activator activity	0.00583	3.01937
Ribo4	MF	GO:0005178	integrin binding	0.00816	2
Ribo4	MF	GO:0015278	calcium-release channel activity	0.00914	3.73697
Ribo4	MF	GO:0031994	insulin-like growth factor I binding	0.00914	3.73697
Ribo4	MF	GO:0019903	protein phosphatase binding	0.00926	1.79419
Ribo4	MF	GO:0044325	ion channel binding	0.00943	1.95456
Ribo4	MF	GO:0004725	protein tyrosine phosphatase activity	0.00946	2.26882
Ribo4	MF	GO:0004252	serine-type endopeptidase activity	0.01268	2.61411
Ribo4	MF	GO:0042626	ATPase activity, coupled to transmembran...	0.01363	1.91594
Ribo4	MF	GO:0016248	channel inhibitor activity	0.0148	2.47393
Ribo4	MF	GO:0030215	semaphorin receptor binding	0.0154	3.39593
Ribo4	MF	GO:0009975	cyclase activity	0.0154	3.39593
Ribo4	MF	GO:0016849	phosphorus-oxygen lyase activity	0.01779	3.25154
Ribo4	MF	GO:0030165	PDZ domain binding	0.01832	1.98564
Ribo4	MF	GO:0017080	sodium channel regulator activity	0.02033	3.18442
Ribo4	MF	GO:0008235	metalloexopeptidase activity	0.02273	2.90689
Ribo4	MF	GO:0050998	nitric-oxide synthase binding	0.03185	2.8365
Ribo4	MF	GO:0005112	Notch binding	0.03185	2.8365
Ribo4	MF	GO:0004722	protein serine/threonine phosphatase act...	0.03246	2.09954
Ribo4	MF	GO:0020037	heme binding	0.03246	2.09954
Ribo4	MF	GO:0097110	scaffold protein binding	0.0361	2.03899
Ribo4	MF	GO:0050840	extracellular matrix binding	0.0414	2.22882
Ribo4	MF	GO:0005249	voltage-gated potassium channel activity	0.0418	2.59946
Ribo4	MF	GO:0008528	G protein-coupled peptide receptor activ...	0.0418	2.59946
Ribo4	MF	GO:0008138	protein tyrosine/serine/threonine phosph...	0.04535	2.55639
Ribo4	MF	GO:0019838	growth factor binding	0.04721	2.29134
Ribo5	MF	GO:0008353	RNA polymerase II CTD heptapeptide repea...	0.016	5.64386
Ribo5	MF	GO:0031435	mitogen-activated protein kinase kinase ...	0.019	5.64386
Ribo5	MF	GO:0043014	alpha-tubulin binding	0.021	5.64386
Ribo5	MF	GO:0015108	chloride transmembrane transporter activ...	0.028	5.05889
Ribo5	MF	GO:0001103	RNA polymerase II repressing transcripti...	0.029	5.05889
Ribo5	MF	GO:0004712	protein serine/threonine/tyrosine kinase...	0.03	5.05889
Ribo5	MF	GO:0001784	phosphotyrosine residue binding	0.031	5.05889
Ribo5	MF	GO:0048487	beta-tubulin binding	0.031	5.05889
Ribo5	MF	GO:0003777	microtubule motor activity	0.032	5.05889
Ribo5	MF	GO:0016667	oxidoreductase activity, acting on a sul...	0.041	4.64386
Ribo5	MF	GO:0019888	protein phosphatase regulator activity	0.041	4.64386
Ribo5	MF	GO:0004222	metalloendopeptidase activity	0.047	4.32193
Ribo6	MF	GO:0045296	cadherin binding	0.00028	6.05889
Ribo6	MF	GO:0003700	DNA-binding transcription factor activit...	0.00295	2.8365
Ribo6	MF	GO:0070411	I-SMAD binding	0.00919	6.64386
Ribo6	MF	GO:0016722	oxidoreductase activity, oxidizing metal...	0.01011	6.64386
Ribo6	MF	GO:0003713	transcription coactivator activity	0.01289	3.47393
Ribo6	MF	GO:0017046	peptide hormone binding	0.0165	5.64386
Ribo6	MF	GO:0035255	ionotropic glutamate receptor binding	0.01741	5.64386
Ribo6	MF	GO:0050998	nitric-oxide synthase binding	0.01741	5.64386
Ribo6	MF	GO:0008528	G protein-coupled peptide receptor activ...	0.02013	5.64386
Ribo6	MF	GO:0032452	histone demethylase activity	0.02104	5.64386
Ribo6	MF	GO:0097718	disordered domain specific binding	0.02104	5.64386
Ribo6	MF	GO:0001046	core promoter sequence-specific DNA bind...	0.02375	5.64386
Ribo6	MF	GO:0001102	RNA polymerase II activating transcripti...	0.02556	5.05889
Ribo6	MF	GO:0005507	copper ion binding	0.02646	5.05889
Ribo6	MF	GO:0051019	mitogen-activated protein kinase binding	0.02826	5.05889
Ribo6	MF	GO:0030331	estrogen receptor binding	0.03186	5.05889
Ribo6	MF	GO:0050840	extracellular matrix binding	0.03901	4.64386
Ribo6	MF	GO:0005518	collagen binding	0.03991	4.64386
Ribo6	MF	GO:0035064	methylated histone binding	0.04169	4.64386
Ribo6	MF	GO:0070491	repressing transcription factor binding	0.04701	4.32193
Ribo6	MF	GO:0031490	chromatin DNA binding	0.04966	4.32193
Ribo7	MF	GO:0046933	proton-transporting ATP synthase activit...	0.0033	4.47393
Ribo7	MF	GO:0009055	electron transfer activity	0.01	2.73697
Ribo7	MF	GO:0051537	2 iron, 2 sulfur cluster binding	0.0106	3.64386
Ribo7	MF	GO:0046872	metal ion binding	0.0155	0.77903
Ribo7	MF	GO:0008374	O-acyltransferase activity	0.0231	3.05889
Ribo7	MF	GO:0051539	4 iron, 4 sulfur cluster binding	0.0318	2.8365
Ribo8	MF	GO:0017166	vinculin binding	0.00024	6.64386
Ribo8	MF	GO:0005096	GTPase activator activity	0.00366	3.22882
Ribo8	MF	GO:0043274	phospholipase binding	0.01945	5.64386
Ribo8	MF	GO:0034450	ubiquitin-ubiquitin ligase activity	0.01945	5.64386
Ribo8	MF	GO:0015278	calcium-release channel activity	0.01945	5.64386
Ribo8	MF	GO:0051018	protein kinase A binding	0.02381	4.8365
Ribo8	MF	GO:0030552	cAMP binding	0.02521	5.05889
Ribo8	MF	GO:0034236	protein kinase A catalytic subunit bindi...	0.02521	5.05889
Ribo8	MF	GO:0061630	ubiquitin protein ligase activity	0.0265	3.37084
Ribo8	MF	GO:0034237	protein kinase A regulatory subunit bind...	0.03285	5.05889
Ribo8	MF	GO:0042169	SH2 domain binding	0.04043	4.64386
Ribo9	MF	GO:0044212	transcription regulatory region DNA bind...	1.3e-05	1.63103
Ribo9	MF	GO:0005096	GTPase activator activity	0.0071	2.37707
Ribo9	MF	GO:1990837	sequence-specific double-stranded DNA bi...	0.0098	0.950369
Ribo9	MF	GO:0016597	amino acid binding	0.0099	3.73697
Ribo9	MF	GO:0001078	proximal promoter DNA-binding transcript...	0.0101	2.73697
Ribo9	MF	GO:0004812	aminoacyl-tRNA ligase activity	0.0145	3.47393
Ribo9	MF	GO:0004842	ubiquitin-protein transferase activity	0.015	1.70134
Ribo9	MF	GO:0017137	Rab GTPase binding	0.016	2.5009
Ribo9	MF	GO:0030295	protein kinase activator activity	0.0174	3.32193
Ribo9	MF	GO:0005200	structural constituent of cytoskeleton	0.0198	3.18442
Ribo9	MF	GO:0051015	actin filament binding	0.0218	2.32193
Ribo9	MF	GO:0140110	transcription regulator activity	0.0399	0.858131
Ribo9	MF	GO:0070182	DNA polymerase binding	0.0463	4.32193
Ribo9	MF	GO:0015278	calcium-release channel activity	0.0463	4.32193
Ribo10	MF	GO:0051015	actin filament binding	3.9e-05	3.22882
Ribo10	MF	GO:0003713	transcription coactivator activity	0.00082	2.59946
Ribo10	MF	GO:0004190	aspartic-type endopeptidase activity	0.0011	5.32193
Ribo10	MF	GO:0035250	UDP-galactosyltransferase activity	0.00135	5.05889
Ribo10	MF	GO:0042802	identical protein binding	0.00753	0.974005
Ribo10	MF	GO:0001540	amyloid-beta binding	0.01001	3.73697
Ribo10	MF	GO:0008408	3'-5' exonuclease activity	0.01203	3.55639
Ribo10	MF	GO:0019899	enzyme binding	0.02113	1.09832
Ribo10	MF	GO:0001882	nucleoside binding	0.03024	0.655172
Ribo10	MF	GO:0005543	phospholipid binding	0.03211	1.74904
Ribo10	MF	GO:0070182	DNA polymerase binding	0.04964	4.32193
Ribo10	MF	GO:0016895	exodeoxyribonuclease activity, producing...	0.04964	4.32193
Ribo10	MF	GO:0030898	actin-dependent ATPase activity	0.04964	4.32193
Ribo10	MF	GO:0000900	translation repressor activity, mRNA reg...	0.04964	4.32193
Ribo10	MF	GO:0019103	pyrimidine nucleotide binding	0.04964	4.32193
Ribo10	MF	GO:0043274	phospholipase binding	0.04964	4.32193
Ribo10	MF	GO:0030169	low-density lipoprotein particle binding	0.04964	4.32193
Ribo11	MF	GO:0070181	small ribosomal subunit rRNA binding	0.016	5.64386
Ribo11	MF	GO:0005092	GDP-dissociation inhibitor activity	0.016	5.64386
Ribo11	MF	GO:0030552	cAMP binding	0.021	5.64386
Ribo11	MF	GO:0008327	methyl-CpG binding	0.021	5.64386
Ribo11	MF	GO:0015035	protein disulfide oxidoreductase activit...	0.024	5.64386
Ribo11	MF	GO:0048027	mRNA 5'-UTR binding	0.026	5.05889
Ribo11	MF	GO:0004298	threonine-type endopeptidase activity	0.027	5.05889
Ribo11	MF	GO:0043028	cysteine-type endopeptidase regulator ac...	0.032	5.05889
Ribo11	MF	GO:0030332	cyclin binding	0.032	5.05889
Ribo11	MF	GO:0015485	cholesterol binding	0.033	5.05889
Ribo11	MF	GO:0005544	calcium-dependent phospholipid binding	0.033	5.05889
Ribo11	MF	GO:0042169	SH2 domain binding	0.033	5.05889
Ribo11	MF	GO:0008200	ion channel inhibitor activity	0.037	4.64386
Ribo11	MF	GO:0001786	phosphatidylserine binding	0.037	4.64386
Ribo11	MF	GO:0016504	peptidase activator activity	0.04	4.64386
Ribo11	MF	GO:0015276	ligand-gated ion channel activity	0.043	4.64386
Ribo11	MF	GO:0008536	Ran GTPase binding	0.043	4.64386
Ribo11	MF	GO:0035591	signaling adaptor activity	0.046	4.32193
Ribo11	MF	GO:0016860	intramolecular oxidoreductase activity	0.046	4.32193
Ribo12	MF	GO:0005385	zinc ion transmembrane transporter activ...	0.00013	4.90689
Ribo12	MF	GO:0004725	protein tyrosine phosphatase activity	0.00029	3.08314
Ribo12	MF	GO:0031492	nucleosomal DNA binding	0.00037	4.32193
Ribo12	MF	GO:0051861	glycolipid binding	0.00464	4.32193
Ribo12	MF	GO:0003756	protein disulfide isomerase activity	0.00564	4.05889
Ribo12	MF	GO:0008201	heparin binding	0.00898	2.2863
Ribo12	MF	GO:0005178	integrin binding	0.01158	2.18442
Ribo12	MF	GO:0005158	insulin receptor binding	0.0166	3.32193
Ribo12	MF	GO:0004867	serine-type endopeptidase inhibitor acti...	0.02589	3
Ribo12	MF	GO:0019894	kinesin binding	0.03008	2.88897
Ribo12	MF	GO:0017069	snRNA binding	0.03452	2.78588
Ribo12	MF	GO:0005507	copper ion binding	0.03683	2.73697
Ribo12	MF	GO:0030544	Hsp70 protein binding	0.0441	2.55639
Ribo13	MF	GO:0046933	proton-transporting ATP synthase activit...	0.00011	6.64386
Ribo13	MF	GO:0004298	threonine-type endopeptidase activity	0.00032	6.05889
Ribo13	MF	GO:0031406	carboxylic acid binding	0.01116	3.64386
Ribo13	MF	GO:0070402	NADPH binding	0.01604	5.64386
Ribo13	MF	GO:0001848	complement binding	0.01922	5.64386
Ribo13	MF	GO:0031690	adrenergic receptor binding	0.02081	5.64386
Ribo13	MF	GO:0016417	S-acyltransferase activity	0.02239	5.64386
Ribo13	MF	GO:0046961	proton-transporting ATPase activity, rot...	0.02555	5.05889
Ribo13	MF	GO:0090079	translation regulator activity, nucleic ...	0.0287	5.05889
Ribo13	MF	GO:0051537	2 iron, 2 sulfur cluster binding	0.0287	5.05889
Ribo13	MF	GO:0016620	oxidoreductase activity, acting on the a...	0.04121	4.64386
Ribo14	MF	GO:0017069	snRNA binding	0.0077	2.87127
Ribo14	MF	GO:0047485	protein N-terminus binding	0.0111	1.88897
Ribo14	MF	GO:0030544	Hsp70 protein binding	0.0112	2.67423
Ribo14	MF	GO:0005537	mannose binding	0.0128	3.47393
Ribo14	MF	GO:0003676	nucleic acid binding	0.0151	0.447459
Ribo14	MF	GO:0051082	unfolded protein binding	0.0174	2
Ribo14	MF	GO:0051087	chaperone binding	0.0201	1.94342
Ribo14	MF	GO:0031072	heat shock protein binding	0.0237	2.03899
Ribo14	MF	GO:0051787	misfolded protein binding	0.0251	3
Ribo14	MF	GO:0008143	poly(A) binding	0.028	2.94342
Ribo14	MF	GO:0070412	R-SMAD binding	0.0373	2.68966
Ribo14	MF	GO:0019903	protein phosphatase binding	0.038	1.55639
Ribo14	MF	GO:0043548	phosphatidylinositol 3-kinase binding	0.0441	2.55639
Ribo14	MF	GO:0016887	ATPase activity	0.0474	0.380822
Ribo15	MF	GO:0043295	glutathione binding	0.015	5.64386
Ribo15	MF	GO:0016799	hydrolase activity, hydrolyzing N-glycos...	0.016	5.64386
Ribo15	MF	GO:0004364	glutathione transferase activity	0.02	5.64386
Ribo15	MF	GO:0005112	Notch binding	0.024	5.64386
Ribo15	MF	GO:0070412	R-SMAD binding	0.026	5.05889
Ribo16	MF	GO:0016746	transferase activity, transferring acyl ...	0.00094	1.55639
Ribo16	MF	GO:0008137	NADH dehydrogenase (ubiquinone) activity	0.00231	3.47393
Ribo16	MF	GO:0043130	ubiquitin binding	0.00811	2.32193
Ribo16	MF	GO:0043027	cysteine-type endopeptidase inhibitor ac...	0.01278	3.47393
Ribo16	MF	GO:0016616	oxidoreductase activity, acting on the C...	0.0153	2.05889
Ribo16	MF	GO:0048156	tau protein binding	0.024	3.05889
Ribo16	MF	GO:0015248	sterol transporter activity	0.02659	2.94342
Ribo16	MF	GO:0019003	GDP binding	0.02816	2.18442
Ribo16	MF	GO:0015485	cholesterol binding	0.03209	2.8365
Ribo16	MF	GO:0005504	fatty acid binding	0.03499	2.73697
Ribo16	MF	GO:0001786	phosphatidylserine binding	0.03799	2.68966
Ribo16	MF	GO:1901567	fatty acid derivative binding	0.0397	2.73697
Ribo17	MF	GO:0008553	proton-exporting ATPase activity, phosph...	0.00019	4.64386
Ribo17	MF	GO:0005484	SNAP receptor activity	0.00165	3.64386
Ribo17	MF	GO:0000900	translation repressor activity, mRNA reg...	0.00602	4.05889
Ribo17	MF	GO:0030331	estrogen receptor binding	0.00831	2.8365
Ribo17	MF	GO:0051082	unfolded protein binding	0.00885	2.2863
Ribo17	MF	GO:0042975	peroxisome proliferator activated recept...	0.0102	3.64386
Ribo17	MF	GO:0051087	chaperone binding	0.01027	2.23447
Ribo17	MF	GO:0070577	lysine-acetylated histone binding	0.01181	3.55639
Ribo17	MF	GO:0015035	protein disulfide oxidoreductase activit...	0.01352	3.47393
Ribo17	MF	GO:0070530	K63-linked polyubiquitin modification-de...	0.01924	3.18442
Ribo17	MF	GO:0016922	nuclear receptor binding	0.02353	3.05889
Ribo17	MF	GO:0043548	phosphatidylinositol 3-kinase binding	0.03061	2.8365
Ribo17	MF	GO:0043130	ubiquitin binding	0.03359	2.07907
Ribo17	MF	GO:0036002	pre-mRNA binding	0.04118	2.64386
Ribo17	MF	GO:0019904	protein domain specific binding	0.04588	0.971431
Ribo17	MF	GO:0001067	regulatory region nucleic acid binding	0.04842	-0.528571
Ribo1	CC	GO:0005615	extracellular space	6.5e-07	1.47531
Ribo1	CC	GO:0005581	collagen trimer	0.0002	2.78588
Ribo1	CC	GO:0005604	basement membrane	0.00057	2.28129
Ribo1	CC	GO:0062023	collagen-containing extracellular matrix	0.00064	2.1343
Ribo1	CC	GO:0001891	phagocytic cup	0.00174	3.58496
Ribo1	CC	GO:0005886	plasma membrane	0.00489	0.707028
Ribo1	CC	GO:0044456	synapse part	0.00505	0.570607
Ribo1	CC	GO:0043235	receptor complex	0.00799	1.47895
Ribo1	CC	GO:0009986	cell surface	0.00977	1.19884
Ribo1	CC	GO:0043195	terminal bouton	0.0118	2.64386
Ribo1	CC	GO:0043005	neuron projection	0.01772	0.463424
Ribo1	CC	GO:0005614	interstitial matrix	0.02498	3
Ribo1	CC	GO:0030126	COPI vesicle coat	0.02878	2.88897
Ribo1	CC	GO:0030027	lamellipodium	0.02909	1.36463
Ribo1	CC	GO:0097440	apical dendrite	0.03279	2.78588
Ribo1	CC	GO:0016010	dystrophin-associated glycoprotein compl...	0.03279	2.78588
Ribo1	CC	GO:0005839	proteasome core complex	0.04603	2.51457
Ribo2	CC	GO:0005604	basement membrane	0.0055	2.49411
Ribo2	CC	GO:0098644	complex of collagen trimers	0.0075	3.94342
Ribo2	CC	GO:0009897	external side of plasma membrane	0.01	1.93236
Ribo2	CC	GO:0044798	nuclear transcription factor complex	0.0233	1.16273
Ribo2	CC	GO:0046658	anchored component of plasma membrane	0.025	3
Ribo2	CC	GO:0031463	Cul3-RING ubiquitin ligase complex	0.0307	2.8365
Ribo2	CC	GO:0005815	microtubule organizing center	0.0342	0.411195
Ribo2	CC	GO:0005783	endoplasmic reticulum	0.0347	0.694321
Ribo2	CC	GO:0035861	site of double-strand break	0.039	2.68966
Ribo2	CC	GO:0031312	extrinsic component of organelle membran...	0.0457	2.55639
Ribo2	CC	GO:0099081	supramolecular polymer	0.0466	0.292181
Ribo3	CC	GO:0005739	mitochondrion	0.0092	0.831358
Ribo3	CC	GO:0005765	lysosomal membrane	0.0401	2.64386
Ribo3	CC	GO:0005750	mitochondrial respiratory chain complex ...	0.0422	4.64386
Ribo4	CC	GO:0005615	extracellular space	1.6e-18	2.29336
Ribo4	CC	GO:0062023	collagen-containing extracellular matrix	1.4e-10	2.96128
Ribo4	CC	GO:0005887	integral component of plasma membrane	1.7e-08	2.07097
Ribo4	CC	GO:0005604	basement membrane	1.6e-06	2.9936
Ribo4	CC	GO:0009897	external side of plasma membrane	0.00023	2.11334
Ribo4	CC	GO:0099512	supramolecular fiber	0.00024	0.643856
Ribo4	CC	GO:0009986	cell surface	0.00034	1.87567
Ribo4	CC	GO:0044420	extracellular matrix component	0.00034	3.15843
Ribo4	CC	GO:0071944	cell periphery	0.00036	0.94944
Ribo4	CC	GO:0009925	basal plasma membrane	0.00049	3.39593
Ribo4	CC	GO:0005614	interstitial matrix	0.00085	3.90689
Ribo4	CC	GO:0043235	receptor complex	0.00172	2.15843
Ribo4	CC	GO:0031410	cytoplasmic vesicle	0.00579	0.811904
Ribo4	CC	GO:0099738	cell cortex region	0.00749	2.87127
Ribo4	CC	GO:0065010	extracellular membrane-bounded organelle	0.00935	3.73697
Ribo4	CC	GO:0033655	host cell cytoplasm part	0.01132	3.55639
Ribo4	CC	GO:0098978	glutamatergic synapse	0.01214	1.27462
Ribo4	CC	GO:0045178	basal part of cell	0.01276	3.42146
Ribo4	CC	GO:0016342	catenin complex	0.01345	3.47393
Ribo4	CC	GO:0030424	axon	0.01561	0.459689
Ribo4	CC	GO:0098982	GABA-ergic synapse	0.01658	2.47393
Ribo4	CC	GO:0005886	plasma membrane	0.02258	0.861525
Ribo4	CC	GO:0001669	acrosomal vesicle	0.02657	2.20645
Ribo4	CC	GO:0098802	plasma membrane receptor complex	0.02781	2.1047
Ribo4	CC	GO:0016021	integral component of membrane	0.02858	0.848167
Ribo4	CC	GO:0005911	cell-cell junction	0.0297	1.06643
Ribo4	CC	GO:0005581	collagen trimer	0.02989	2.14136
Ribo4	CC	GO:0044297	cell body	0.03882	0.906071
Ribo4	CC	GO:0005768	endosome	0.04218	0.425568
Ribo4	CC	GO:0044433	cytoplasmic vesicle part	0.04443	0.304006
Ribo5	CC	GO:0016021	integral component of membrane	0.011	1.49411
Ribo5	CC	GO:0034358	plasma lipoprotein particle	0.014	6.64386
Ribo5	CC	GO:0000159	protein phosphatase type 2A complex	0.017	5.64386
Ribo5	CC	GO:0001917	photoreceptor inner segment	0.017	5.64386
Ribo5	CC	GO:0000242	pericentriolar material	0.018	5.64386
Ribo5	CC	GO:0032839	dendrite cytoplasm	0.02	5.64386
Ribo5	CC	GO:0034451	centriolar satellite	0.021	5.64386
Ribo5	CC	GO:0060170	ciliary membrane	0.024	5.64386
Ribo5	CC	GO:0032391	photoreceptor connecting cilium	0.024	5.64386
Ribo5	CC	GO:0001750	photoreceptor outer segment	0.026	5.05889
Ribo6	CC	GO:0032993	protein-DNA complex	0.0039	4.32193
Ribo6	CC	GO:0030027	lamellipodium	0.0049	4.18442
Ribo6	CC	GO:0044456	synapse part	0.005	2.05889
Ribo6	CC	GO:0031965	nuclear membrane	0.0093	3.73697
Ribo6	CC	GO:0031528	microvillus membrane	0.0099	6.64386
Ribo6	CC	GO:0005615	extracellular space	0.0102	2.61411
Ribo6	CC	GO:0016342	catenin complex	0.0108	6.64386
Ribo6	CC	GO:0005916	fascia adherens	0.0117	6.64386
Ribo6	CC	GO:0099092	postsynaptic density, intracellular comp...	0.0162	5.64386
Ribo6	CC	GO:0005719	nuclear euchromatin	0.0198	5.64386
Ribo6	CC	GO:0046658	anchored component of plasma membrane	0.0233	5.64386
Ribo6	CC	GO:0099738	cell cortex region	0.0242	5.64386
Ribo6	CC	GO:0043198	dendritic shaft	0.0277	5.05889
Ribo6	CC	GO:0016328	lateral plasma membrane	0.0304	5.05889
Ribo6	CC	GO:0048786	presynaptic active zone	0.033	5.05889
Ribo6	CC	GO:0044420	extracellular matrix component	0.033	5.05889
Ribo6	CC	GO:0005913	cell-cell adherens junction	0.0428	5.05889
Ribo7	CC	GO:0031463	Cul3-RING ubiquitin ligase complex	0.0021	3.52838
Ribo7	CC	GO:0005753	mitochondrial proton-transporting ATP sy...	0.0077	3.94342
Ribo7	CC	GO:0000151	ubiquitin ligase complex	0.0077	1.97548
Ribo7	CC	GO:0005802	trans-Golgi network	0.0077	2.02327
Ribo7	CC	GO:0043209	myelin sheath	0.0127	1.84684
Ribo7	CC	GO:0046658	anchored component of plasma membrane	0.0223	3.12029
Ribo7	CC	GO:1990204	oxidoreductase complex	0.0355	2.45403
Ribo7	CC	GO:0030667	secretory granule membrane	0.0388	2.68966
Ribo7	CC	GO:0042645	mitochondrial nucleoid	0.0451	2.55639
Ribo7	CC	GO:0005788	endoplasmic reticulum lumen	0.0495	2.47393
Ribo8	CC	GO:0030864	cortical actin cytoskeleton	0.00015	4.76939
Ribo8	CC	GO:0009925	basal plasma membrane	0.00102	5.32193
Ribo8	CC	GO:0005901	caveola	0.00675	3.94342
Ribo8	CC	GO:0032045	guanyl-nucleotide exchange factor comple...	0.01909	5.64386
Ribo8	CC	GO:0031527	filopodium membrane	0.01909	5.64386
Ribo8	CC	GO:0016327	apicolateral plasma membrane	0.01909	5.64386
Ribo8	CC	GO:0030426	growth cone	0.02044	3.18442
Ribo8	CC	GO:0043220	Schmidt-Lanterman incisure	0.02098	5.64386
Ribo8	CC	GO:0042383	sarcolemma	0.02178	3.12029
Ribo8	CC	GO:0043005	neuron projection	0.02738	1.85726
Ribo8	CC	GO:0016010	dystrophin-associated glycoprotein compl...	0.0285	5.05889
Ribo8	CC	GO:0030863	cortical cytoskeleton	0.0299	4.8365
Ribo8	CC	GO:0016324	apical plasma membrane	0.03018	2.8365
Ribo8	CC	GO:0033017	sarcoplasmic reticulum membrane	0.03224	5.05889
Ribo8	CC	GO:0035371	microtubule plus-end	0.03224	5.05889
Ribo8	CC	GO:0030016	myofibril	0.03262	2.78588
Ribo8	CC	GO:0016020	membrane	0.0373	0.812914
Ribo8	CC	GO:0051233	spindle midzone	0.04154	4.64386
Ribo8	CC	GO:0005790	smooth endoplasmic reticulum	0.04338	4.64386
Ribo8	CC	GO:0034704	calcium channel complex	0.04338	4.64386
Ribo8	CC	GO:0043195	terminal bouton	0.04707	4.32193
Ribo9	CC	GO:0005814	centriole	4.1e-06	4.32193
Ribo9	CC	GO:0005801	cis-Golgi network	2.1e-05	4.55639
Ribo9	CC	GO:0099524	postsynaptic cytosol	0.0031	4.64386
Ribo9	CC	GO:0032420	stereocilium	0.0042	4.32193
Ribo9	CC	GO:0043025	neuronal cell body	0.0044	1.9342
Ribo9	CC	GO:0005813	centrosome	0.0117	2.00965
Ribo9	CC	GO:0038201	TOR complex	0.0135	5.05889
Ribo9	CC	GO:0005793	endoplasmic reticulum-Golgi intermediate...	0.0241	3.05889
Ribo9	CC	GO:0030864	cortical actin cytoskeleton	0.0276	2.94342
Ribo9	CC	GO:0005884	actin filament	0.0301	2.98089
Ribo9	CC	GO:0031514	motile cilium	0.0304	2.88897
Ribo9	CC	GO:0044441	ciliary part	0.033	2.30401
Ribo9	CC	GO:0120038	plasma membrane bounded cell projection ...	0.0343	1.75014
Ribo9	CC	GO:0030136	clathrin-coated vesicle	0.0416	2.64386
Ribo9	CC	GO:0005654	nucleoplasm	0.044	0.733535
Ribo9	CC	GO:0031932	TORC2 complex	0.0455	4.32193
Ribo9	CC	GO:0036064	ciliary basal body	0.0471	2.51457
Ribo9	CC	GO:0044292	dendrite terminus	0.0499	4.32193
Ribo10	CC	GO:0032580	Golgi cisterna membrane	0.0011	5.32193
Ribo10	CC	GO:0030863	cortical cytoskeleton	0.0038	3.01937
Ribo10	CC	GO:0005882	intermediate filament	0.0109	3.64386
Ribo10	CC	GO:0016328	lateral plasma membrane	0.0123	3.55639
Ribo10	CC	GO:0043601	nuclear replisome	0.0194	4.47393
Ribo10	CC	GO:0005643	nuclear pore	0.0265	3
Ribo10	CC	GO:0016020	membrane	0.0276	0.441167
Ribo10	CC	GO:0045211	postsynaptic membrane	0.0288	2.16273
Ribo10	CC	GO:0043204	perikaryon	0.0294	2.88897
Ribo10	CC	GO:0005884	actin filament	0.0344	2.90689
Ribo10	CC	GO:0098589	membrane region	0.0344	0.810966
Ribo10	CC	GO:0001725	stress fiber	0.0358	2.73697
Ribo10	CC	GO:0005829	cytosol	0.043	0.661198
Ribo10	CC	GO:0016363	nuclear matrix	0.0449	2.55639
Ribo10	CC	GO:0043025	neuronal cell body	0.0463	1.82794
Ribo10	CC	GO:0030057	desmosome	0.0487	4.32193
Ribo10	CC	GO:0098871	postsynaptic actin cytoskeleton	0.0487	4.32193
Ribo10	CC	GO:0016327	apicolateral plasma membrane	0.0487	4.32193
Ribo11	CC	GO:0022627	cytosolic small ribosomal subunit	0.00063	5.64386
Ribo11	CC	GO:0042383	sarcolemma	0.01496	3.39593
Ribo11	CC	GO:0001891	phagocytic cup	0.02042	5.64386
Ribo11	CC	GO:0000788	nuclear nucleosome	0.02353	5.64386
Ribo11	CC	GO:0005839	proteasome core complex	0.02817	5.05889
Ribo11	CC	GO:0120111	neuron projection cytoplasm	0.04198	4.64386
Ribo11	CC	GO:0005739	mitochondrion	0.04409	1.2723
Ribo12	CC	GO:0000786	nucleosome	0.00013	3.80255
Ribo12	CC	GO:0030496	midbody	0.00349	2.29336
Ribo12	CC	GO:0043073	germ cell nucleus	0.00603	4.05889
Ribo12	CC	GO:0005615	extracellular space	0.00628	1.24909
Ribo12	CC	GO:0005916	fascia adherens	0.00843	3.8365
Ribo12	CC	GO:0005788	endoplasmic reticulum lumen	0.00918	2.80255
Ribo12	CC	GO:0099061	integral component of postsynaptic densi...	0.01119	3.64386
Ribo12	CC	GO:0000788	nuclear nucleosome	0.01119	3.64386
Ribo12	CC	GO:0002102	podosome	0.02146	3.12029
Ribo12	CC	GO:0005719	nuclear euchromatin	0.02344	3.05889
Ribo12	CC	GO:0001725	stress fiber	0.02724	2.20645
Ribo12	CC	GO:0072686	mitotic spindle	0.02964	2.16273
Ribo13	CC	GO:0033178	proton-transporting two-sector ATPase co...	0.00013	6.64386
Ribo13	CC	GO:0005839	proteasome core complex	0.00035	6.05889
Ribo13	CC	GO:0098982	GABA-ergic synapse	0.00142	5.05889
Ribo13	CC	GO:0048786	presynaptic active zone	0.0015	5.05889
Ribo13	CC	GO:0005743	mitochondrial inner membrane	0.00379	2.97143
Ribo13	CC	GO:0005759	mitochondrial matrix	0.01534	3.14136
Ribo13	CC	GO:0005753	mitochondrial proton-transporting ATP sy...	0.02353	5.64386
Ribo13	CC	GO:0033176	proton-transporting V-type ATPase comple...	0.02508	5.05889
Ribo14	CC	GO:0043209	myelin sheath	0.00012	2.07704
Ribo14	CC	GO:0017101	aminoacyl-tRNA synthetase multienzyme co...	0.00068	4.05889
Ribo14	CC	GO:0005634	nucleus	0.00102	0.489678
Ribo14	CC	GO:0101031	chaperone complex	0.00136	3.70526
Ribo14	CC	GO:1904949	ATPase complex	0.00935	1.8365
Ribo14	CC	GO:0031228	intrinsic component of Golgi membrane	0.0151	2.12029
Ribo14	CC	GO:0043197	dendritic spine	0.01997	1.68038
Ribo14	CC	GO:0005730	nucleolus	0.0213	0.754707
Ribo14	CC	GO:0005686	U2 snRNP	0.02676	2.94342
Ribo14	CC	GO:0099524	postsynaptic cytosol	0.02981	2.88897
Ribo14	CC	GO:0098978	glutamatergic synapse	0.03406	1.09311
Ribo14	CC	GO:0044297	cell body	0.04282	0.241758
Ribo14	CC	GO:0030134	COPII-coated ER to Golgi transport vesic...	0.04287	2.22882
Ribo14	CC	GO:0046540	U4/U6 x U5 tri-snRNP complex	0.04327	2.59946
Ribo14	CC	GO:0005793	endoplasmic reticulum-Golgi intermediate...	0.04399	1.92504
Ribo14	CC	GO:0071005	U2-type precatalytic spliceosome	0.04693	2.51457
Ribo15	CC	GO:0043209	myelin sheath	0.018	3.25154
Ribo15	CC	GO:0033017	sarcoplasmic reticulum membrane	0.023	5.64386
Ribo15	CC	GO:0031305	integral component of mitochondrial inne...	0.039	4.64386
Ribo15	CC	GO:0005730	nucleolus	0.041	1.90689
Ribo16	CC	GO:0005747	mitochondrial respiratory chain complex ...	0.00014	3.29336
Ribo16	CC	GO:0005739	mitochondrion	0.00117	1.16107
Ribo16	CC	GO:0043195	terminal bouton	0.00431	3.18442
Ribo16	CC	GO:0045239	tricarboxylic acid cycle enzyme complex	0.00899	3.73697
Ribo16	CC	GO:0098845	postsynaptic endosome	0.00899	3.73697
Ribo16	CC	GO:0005782	peroxisomal matrix	0.01449	3.39593
Ribo16	CC	GO:0031307	integral component of mitochondrial oute...	0.01878	3.25154
Ribo16	CC	GO:0005856	cytoskeleton	0.01975	0.460334
Ribo16	CC	GO:0005838	proteasome regulatory particle	0.02354	3.05889
Ribo16	CC	GO:0070062	extracellular exosome	0.02459	2.25154
Ribo16	CC	GO:0005681	spliceosomal complex	0.02849	1.29336
Ribo16	CC	GO:0071782	endoplasmic reticulum tubular network	0.03148	2.8365
Ribo16	CC	GO:0044444	cytoplasmic part	0.03471	0.253236
Ribo16	CC	GO:0031966	mitochondrial membrane	0.03974	1.55639
Ribo17	CC	GO:0098993	anchored component of synaptic vesicle m...	0.00034	4.42146
Ribo17	CC	GO:0031201	SNARE complex	0.00489	3.09954
Ribo17	CC	GO:0016471	vacuolar proton-transporting V-type ATPa...	0.0087	3.8365
Ribo17	CC	GO:0031902	late endosome membrane	0.0097	2.76939
Ribo17	CC	GO:0042175	nuclear outer membrane-endoplasmic retic...	0.01217	0.0778022
Ribo17	CC	GO:0101031	chaperone complex	0.01352	3.47393
Ribo17	CC	GO:0005753	mitochondrial proton-transporting ATP sy...	0.01352	3.47393
Ribo17	CC	GO:0000502	proteasome complex	0.01647	2.8997
Ribo17	CC	GO:0005838	proteasome regulatory particle	0.01925	3.18442
Ribo17	CC	GO:0005634	nucleus	0.02089	0.339192
Ribo17	CC	GO:0005739	mitochondrion	0.03112	0.615029
Ribo17	CC	GO:0005737	cytoplasm	0.03395	0.197486
Ribo17	CC	GO:0071007	U2-type catalytic step 2 spliceosome	0.03575	2.73697
Ribo17	CC	GO:0031966	mitochondrial membrane	0.03834	0.428843
Ribo17	CC	GO:0022625	cytosolic large ribosomal subunit	0.04692	2.51457
Ribo17	CC	GO:0000139	Golgi membrane	0.04961	1.51457
