# Supplementary material for: A Multi-Network Comparative Analysis of Transcriptome and Translatome Identifies Novel Hub Genes in Cardiac Remodeling
Source: Front Genet. 2020 Nov 16;11:583124. doi: 10.3389/fgene.2020.583124 (PMC7701244; doi:10.3389/fgene.2020.583124)
Supplement: Supplementary Table 6 — Transcriptome and translatome co-expression modules correlation association and significance. [file Table_3.XLSX]

## Sheet: RNA
module	GS.HW.BW.cor	GS.HW.BW.p	GS.HW.BW.sig	GS.path.vs.phys.cor	GS.path.vs.phys.p	GS.path.vs.phys.sig	GS.TAC2d.vs.swim2d.cor	GS.TAC2d.vs.swim2d.p	GS.TAC2d.vs.swim2d.sig	GS.TAC2w.vs.swim2w.cor	GS.TAC2w.vs.swim2w.p	GS.TAC2w.vs.swim2w.sig	GS.swim2w.vs.swim2d.cor	GS.swim2w.vs.swim2d.p	GS.swim2w.vs.swim2d.sig	GS.TAC2w.vs.TAC2d.cor	GS.TAC2w.vs.TAC2d.p	GS.TAC2w.vs.TAC2d.sig
RNA1	0.81	0	1.31127	0.75	1.3e-304	1.23119	0.25	1.9e-25	0.642994	0.78	0	1.63326	0.05	0.04	-0.705448	0.74	2.3e-292	1.40573
RNA10	0.42	1.1e-18	-0.970561	-0.23	3e-06	-0.00761515	0.33	1e-11	1.39516	0.46	1.5e-22	-1.26073	-0.22	8.1e-06	0.154342	0.74	3.1e-71	-1.71808
RNA11	0.4	0.00088	-0.645118	0.45	0.00015	-0.42996	0.21	0.091	0.825299	0.83	7e-18	-1.25419	0.56	1e-06	1.18283	0.63	1.4e-08	-1.13679
RNA12	0.45	1.7e-09	-0.775425	0.64	3.7e-20	-1.01595	-0.016	0.84	0.168415	0.57	2e-15	-1.76675	0.12	0.13	1.67408	0.36	2.4e-06	-0.916608
RNA13	0.25	0.014	-0.605475	0.49	3.5e-07	-1.04742	0.046	0.65	-0.636333	0.52	4.8e-08	-1.37734	0.4	4.9e-05	1.1385	-0.14	0.17	-0.0758325
RNA14	0.27	8.7e-08	-0.576396	0.73	1.3e-64	-1.24459	0.55	1.7e-31	-1.4924	0.37	8.3e-14	-0.993493	-0.0076	0.88	-0.468144	0.053	0.3	0.771016
RNA15	0.61	1.3e-132	-0.977703	0.92	0	-1.42639	0.59	4.3e-122	-1.41335	0.75	5.3e-234	-1.45833	0.04	0.15	-0.0496847	0.21	2.4e-14	-0.536344
RNA16	0.78	2e-35	-1.20718	0.75	2e-31	-0.986023	0.6	1e-17	-1.23707	0.65	2e-21	-1.06985	0.2	0.0096	-1.17053	0.56	3.6e-15	-1.15627
RNA17	0.77	4.1e-233	-1.3565	0.74	5.5e-206	-1.18959	0.34	1.9e-33	-0.622245	0.82	6e-289	-1.63348	0.094	0.0012	0.264927	0.64	1.6e-137	-1.42899
RNA2	0.66	6e-14	1.09477	0.29	0.0033	0.823849	0.21	0.035	1.00485	0.5	1e-07	1.05558	0.47	7.1e-07	1.22167	0.58	2.1e-10	1.04587
RNA3	0.56	7.2e-48	0.823169	0.88	7.4e-184	1.45983	0.54	5.3e-44	1.42927	0.67	9.7e-75	1.5103	0.15	0.00035	-0.452154	0.067	0.11	0.188529
RNA4	0.28	1.3e-05	0.57658	0.84	4.5e-64	1.29467	0.45	3.6e-13	1.37881	0.7	4.5e-36	1.35795	0.047	0.47	-0.728537	0.0095	0.88	-0.428091
RNA5	0.67	1.2e-08	0.614725	0.8	8.3e-14	0.947926	0.16	0.23	0.395527	0.74	4.8e-11	1.30268	0.41	0.0015	-1.2621	0.3	0.023	0.552541
RNA6	0.86	1.3e-38	1.09615	0.66	2.4e-17	0.554823	-0.018	0.84	-0.256177	0.85	7e-37	1.21127	0.27	0.0021	0.206164	0.8	9.8e-30	1.29423
RNA7	0.62	4.7e-23	1.06079	0.11	0.12	0.264603	-0.037	0.6	-0.66803	0.63	5.8e-24	1.07231	0.18	0.01	0.513084	0.78	5.4e-43	1.54791
RNA8	0.18	0.0068	0.583762	0.0099	0.88	0.285657	0.22	0.00089	-1.17886	0.55	3.4e-19	1.42236	0.44	4.5e-12	-1.57348	0.53	1.1e-17	1.30676
RNA9	0.31	0.00048	-0.515325	-0.078	0.39	0.425532	0.23	0.01	0.991728	0.33	0.00019	0.328931	0.25	0.0053	-0.95896	0.67	2.4e-17	-1.33041

## Sheet: Ribo
module	GS.HW.BW.cor	GS.HW.BW.p	GS.HW.BW.sig	GS.path.vs.phys.cor	GS.path.vs.phys.p	GS.path.vs.phys.sig	GS.TAC2d.vs.swim2d.cor	GS.TAC2d.vs.swim2d.p	GS.TAC2d.vs.swim2d.sig	GS.TAC2w.vs.swim2w.cor	GS.TAC2w.vs.swim2w.p	GS.TAC2w.vs.swim2w.sig	GS.swim2w.vs.swim2d.cor	GS.swim2w.vs.swim2d.p	GS.swim2w.vs.swim2d.sig	GS.TAC2w.vs.TAC2d.cor	GS.TAC2w.vs.TAC2d.p	GS.TAC2w.vs.TAC2d.sig
Ribo1	0.42	3e-43	0.972362	0.91	0	1.45474	0.58	2.4e-89	1.49265	0.75	4.1e-178	1.45077	0.12	0.00016	0.589321	0.36	2e-31	0.464688
Ribo10	0.21	0.00011	-0.503239	0.15	0.0061	0.134118	0.76	6.6e-64	1.40836	0.48	1.4e-20	-1.23004	0.46	7.7e-19	1.28269	0.77	1.4e-66	-1.40249
Ribo11	0.32	5.7e-07	-0.888804	-0.038	0.56	-0.0169436	0.29	6.5e-06	0.570223	0.29	6.5e-06	-0.468026	0.42	2e-11	-1.06723	0.78	3.9e-49	-1.36992
Ribo12	0.68	6.6e-98	-1.21163	0.21	1.5e-08	-0.600674	0.28	2.6e-14	0.463104	0.73	1.2e-119	-1.4065	0.07	0.062	0.164437	0.8	6.9e-160	-1.46958
Ribo13	0.41	1.2e-05	-0.810018	0.44	2.1e-06	-0.611188	0.47	3.3e-07	-1.23015	-0.49	8.5e-08	-0.0847576	0.32	0.00078	-1.45887	0.029	0.77	-0.525464
Ribo14	0.83	8.2e-174	-1.26327	0.94	0	-1.33367	0.64	1.6e-79	-1.27658	0.74	1e-118	-1.47428	0.067	0.081	-0.334239	0.77	3e-134	-1.26131
Ribo15	0.25	0.016	0.30093	0.21	0.043	-0.756288	0.45	6e-06	-1.0555	0.25	0.016	-1.13984	0.37	0.00026	1.38465	0.83	8.5e-25	1.2868
Ribo16	0.06	0.058	-0.293732	0.72	1e-159	-1.19375	0.69	1.5e-141	-1.62367	0.2	2e-10	-0.479369	0.32	4e-25	-1.19548	0.66	1.8e-125	1.36728
Ribo17	0.29	1.8e-16	-0.677603	0.85	4.2e-217	-1.30657	0.6	7.3e-77	-1.32549	0.61	4.5e-80	-1.31344	0.12	0.00082	-0.287161	0.24	1.3e-11	0.129651
Ribo2	0.13	0.00077	0.283325	0.71	3.2e-103	1.23114	0.65	3.3e-81	1.60593	0.37	4.9e-23	0.687812	0.22	9.6e-09	0.821927	0.64	5.1e-78	-1.30511
Ribo3	-0.17	0.0038	-0.139192	0.63	2.9e-33	1.08402	0.69	4.8e-42	1.5033	0.48	5.3e-18	1.14098	0.28	1.4e-06	-1.01489	0.62	5.6e-32	-1.4794
Ribo4	0.93	0	1.47847	0.72	8.9e-118	1.14592	0.48	2.1e-43	0.986357	0.73	1.3e-122	1.51944	0.098	0.008	0.566662	0.84	9.4e-196	1.5229
Ribo5	0.61	4.5e-10	1.0056	0.68	6e-13	1.12005	0.15	0.17	0.204575	0.77	4.5e-18	1.57294	0.48	2.9e-06	-1.3271	0.71	1.9e-14	1.21675
Ribo6	0.56	1.4e-10	1.12834	0.12	0.21	0.284451	-0.1	0.29	-0.390311	0.49	4.2e-08	0.943183	0.61	9.4e-13	1.18865	0.6	2.7e-12	1.44636
Ribo7	0.079	0.064	0.726061	-0.055	0.2	0.0189929	0.7	3.6e-82	-1.50085	0.5	4e-36	1.42885	0.43	3.7e-26	-1.29031	0.75	1.9e-100	1.60064
Ribo8	0.61	2.9e-17	0.878809	0.097	0.23	0.235162	0.5	3e-11	1.01877	-0.071	0.38	-0.483735	0.48	2.3e-10	1.60324	0.56	3e-14	1.11932
Ribo9	-0.26	7.3e-06	0.051152	-0.19	0.0011	0.237947	0.65	3.3e-36	1.48377	0.32	2.5e-08	-1.23732	0.62	3.4e-32	1.74378	0.49	6.4e-19	-0.881496

## Sheet: Legend
Column header	description
MM	Correlation (bicor) between eigengene and gene expression values
GS	Correlation (bicor) between genes and biological traits or contrast
GS.HW.BW.cor	Correlation between |MM| and |GS|, where GS=HW/BW
GS.HW.BW.p	Student p-value for the above correlation
GS.HW.BW.sig	Significance Sum(GSi*Ki)/Sum(Ki)^2, where GS=HW/BW, and Ki=intramodular connectivity
GS.path.vs.phys.cor	Correlation between |MM| and |GS|, where GS=path.vs.phys
GS.path.vs.phys.p	Student p-value for the above correlation
GS.path.vs.phys.sig	Significance Sum(GSi*Ki)/Sum(Ki)^2, where GS=path.vs.phys, and Ki=intramodular connectivity
GS.TAC2d.vs.swim2d.cor	Correlation between |MM| and |GS|, where GS=TAC2d.vs.swim2d
GS.TAC2d.vs.swim2d.p	Student p-value for the above correlation
GS.TAC2d.vs.swim2d.sig	Significance Sum(GSi*Ki)/Sum(Ki)^2, where GS=TAC2d.vs.swim2d, and Ki=intramodular connectivity
GS.TAC2w.vs.swim2w.cor	Correlation between |MM| and |GS|, where GS=TAC2w.vs.swim2w
GS.TAC2w.vs.swim2w.p	Student p-value for the above correlation
GS.TAC2w.vs.swim2w.sig	Significance Sum(GSi*Ki)/Sum(Ki)^2, where GS=TAC2w.vs.swim2w, and Ki=intramodular connectivity
GS.swim2w.vs.swim2d.cor	Correlation between |MM| and |GS|, where GS=swim2w.vs.swim2d*
GS.swim2w.vs.swim2d.p	Student p-value for the above correlation*
GS.swim2w.vs.swim2d.sig	Significance Sum(GSi*Ki)/Sum(Ki)^2, where GS=swim2w.vs.swim2d, and Ki=intramodular connectivity*
GS.TAC2w.vs.TAC2d.cor	Correlation between |MM| and |GS|, where GS=TAC2w.vs.TAC2d*
GS.TAC2w.vs.TAC2d.p	Student p-value for the above correlation*
GS.TAC2w.vs.TAC2d.sig	Significance Sum(GSi*Ki)/Sum(Ki)^2, where GS=TAC2w.vs.TAC2d, and Ki=intramodular connectivity*
* The contrasts swim2w.vs.swim2d and TAC2w.vs.TAC2d are reported here, but they are not used in the analyses.
