# Supplementary material for: A Multi-Network Comparative Analysis of Transcriptome and Translatome Identifies Novel Hub Genes in Cardiac Remodeling
Source: Front Genet. 2020 Nov 16;11:583124. doi: 10.3389/fgene.2020.583124 (PMC7701244; doi:10.3389/fgene.2020.583124)
Supplement: Supplementary Table 7 — Extended differential translational-efficiency (DTE) results. [file Table_4.XLSX]

## Sheet: path_vs_phys
row.names	symbol	log2FC.inter	padj.inter	log2FC.rna	padj.rna	log2FC.ribo	padj.ribo	hue	class	translatedmRNA.apvEff	translatedmRNA.apvRvmPAdj	totalmRNA.apvEff	totalmRNA.apvRvmPAdj	translation.apvEff	translation.apvRvmPAdj	buffering.apvEff	buffering.apvRvmPAdj	singleRegMode
ENSMUSG00000062981	Mrpl42	-1.90895	7.07864e-11	-0.628884	0.192474	-2.53784	5.33162e-32	TE	TE	-2.65559	5.30435e-06	-0.699617	0.00257207	-2.41455	0.00166906	-0.397796	0.555622	translation
ENSMUSG00000004667	Polr2e	-0.996273	3.42493e-07	0.0778765	1	-0.918396	2.07182e-07	TE	TE	-0.950056	0.000277212	0.0432263	0.779344	-0.969526	0.00148233	0.275709	0.388055	translation
ENSMUSG00000018377	Vezf1	-0.971437	6.1263e-06	-0.198693	1	-1.17013	3.4935e-10	TE	TE	-1.22405	0.00022223	-0.277103	0.0736384	-1.15557	0.00539947	-0.184312	0.592659	translation
ENSMUSG00000033940	Brk1	-1.30109	7.28628e-06	0.299281	1	-1.00181	5.03196e-05	TE	TE	-1.03418	0.000282994	0.212199	0.281684	-1.00963	0.00264017	0.0923509	0.868217	translation
ENSMUSG00000039016	Timm8b	-1.30155	1.31065e-05	-0.232707	1	-1.53426	9.5859e-13	TE	TE	-1.58164	7.10471e-05	-0.335951	0.0681576	-1.29849	0.00264017	0.167295	0.689913	translation
ENSMUSG00000090247	Bloc1s1	-1.17253	2.15488e-05	0.00176464	1	-1.17077	7.10181e-08	TE	TE	-1.20071	0.000169501	-0.03618	0.846638	-1.18532	0.0011931	0.217332	0.587741	translation
ENSMUSG00000028847	Trappc3	-1.00768	6.40312e-05	-0.0384313	1	-1.04611	2.1989e-07	TE	TE	-1.07124	0.000403937	-0.0716884	0.635733	-1.07292	0.00264017	-0.0790408	0.811967	translation
ENSMUSG00000041341	Atg2b	0.978426	6.64884e-05	-0.107308	1	0.871118	0.000687422	TE	TE	0.940443	0.0041745	-0.175436	0.256528	1.26301	0.000761152	-0.514644	0.0153171	translation
ENSMUSG00000030287	Itpr2	1.5964	6.77236e-05	-0.385345	1	1.21106	0.000654265	TE	TE	1.13744	0.00398646	-0.539152	0.0394838	1.55062	0.00424016	-0.947864	0.0271753	translation
ENSMUSG00000015290	Ubl4a	-0.990388	6.97545e-05	0.000485774	1	-0.989902	1.39184e-06	TE	TE	-1.00502	0.000118484	-0.195261	0.559574	-1.01097	0.000911244	-0.386923	0.749453	translation
ENSMUSG00000032560	Dnajc13	0.99455	8.10154e-05	-0.0376519	1	0.956898	0.000133107	TE	TE	0.992467	0.00247897	-0.189208	0.430639	1.04396	0.0078897	-0.372904	0.385612	translation
ENSMUSG00000056724	Nbeal2	1.56124	9.38291e-05	0.177335	1	1.73857	4.99135e-07	TE	TE	1.86409	0.00104341	-0.088111	0.848806	1.87781	0.00470483	-0.298178	0.737527	translation
ENSMUSG00000029705	Cux1	-0.493548	9.51617e-05	-0.0102441	1	-0.503792	0.00663298	TE	TE	-0.51983	0.00592912	-0.0965754	0.500382	-0.501757	0.0193851	0.0311916	0.926462	translation
ENSMUSG00000056342	Usp34	1.3025	0.000120579	-0.103443	1	1.19906	7.43818e-05	TE	TE	1.05426	0.00515728	-0.198239	0.294198	1.19825	0.00978697	-0.379179	0.189818	translation
ENSMUSG00000038664	Herc1	1.32462	0.000127614	-0.447381	1	0.877235	0.0088734	TE	TE	0.937077	0.00746501	-0.564431	0.0188853	1.14594	0.0248763	-0.721563	0.0574121	translation
ENSMUSG00000063450	Syne2	1.50856	0.000127614	-0.0418963	1	1.46667	1.91084e-06	TE	TE	1.41165	0.000100073	-0.154669	0.572359	1.4798	0.000623072	-0.876559	0.156489	translation
ENSMUSG00000035181	Heatr5a	1.03459	0.000145104	0.652064	0.0246903	1.68665	5.89627e-15	RNA+Ribo	concordant (intensified)	1.64735	4.8664e-05	0.604845	0.000407802	0.623551	0.319723	0.293295	0.207221	abundance
ENSMUSG00000028649	Macf1	1.2971	0.000182394	-0.168504	1	1.1286	7.54968e-05	TE	TE	1.1034	0.00328471	-0.237411	0.139992	1.21847	0.0127866	-0.325537	0.211452	translation
ENSMUSG00000039105	Atp6v1g1	-1.66419	0.000182394	0.18391	1	-1.48028	1.63264e-05	TE	TE	-1.91145	0.0279092	0.0901932	0.619349	-2.08934	0.0371489	0.188042	0.422488	translation
ENSMUSG00000000131	Xpo6	2.02552	0.000212777	-0.0343435	1	1.99118	8.61672e-05	TE	TE	1.69011	0.000820968	-0.353074	0.466071	1.75838	0.00374284	-0.759535	0.419469	translation
ENSMUSG00000019984	Med23	1.00315	0.000212777	-0.0514266	1	0.951725	0.000633721	TE	TE	0.980699	0.00214204	-0.0777734	0.599785	1.01757	0.00751777	-0.159588	0.506	translation
ENSMUSG00000032409	Atr	1.50274	0.00024844	-0.0172329	1	1.4855	0.000150773	TE	TE	1.10818	0.0195077	-0.0984204	0.601638	1.109	0.0481298	-0.0994245	0.727197	translation
ENSMUSG00000061650	Med9	-1.19959	0.000252102	0.25669	1	-0.942904	0.00135076	TE	TE	-0.976708	0.00194771	0.191345	0.157379	-0.783151	0.0294248	0.0376839	0.876745	translation
ENSMUSG00000060981	Hist1h4h	-1.52306	0.000265831	0.2161	1	-1.30696	4.70978e-05	TE	TE	-1.30497	0.000227827	0.109729	0.738476	-1.35299	0.000819083	0.957987	0.134475	translation
ENSMUSG00000024387	Csnk2b	-0.801875	0.000266997	-0.190087	1	-0.991962	6.56024e-08	TE	TE	-1.02636	0.000363514	-0.370629	0.164514	-0.927168	0.00443908	0.162084	0.816498	translation
ENSMUSG00000052299	Ltn1	0.791953	0.000266997	-0.0243184	1	0.767635	0.000878197	TE	TE	0.702727	0.00353376	-0.165376	0.500382	0.705425	0.0120904	-0.186017	0.721049	translation
ENSMUSG00000073664	Nbeal1	1.39506	0.000266997	-0.232559	1	1.1625	0.0003068	TE	TE	1.01022	0.0167898	-0.289876	0.0461399	1.08616	0.0855211	-0.307959	0.129732	background
ENSMUSG00000021027	Ralgapa1	0.973494	0.000278115	-0.434549	0.950314	0.538945	0.218178	TE	TE	0.468657	0.0756632	-0.462575	0.00742175	0.307252	0.498949	-0.416771	0.0571762	background
ENSMUSG00000032253	Phip	1.21623	0.000327834	-0.039951	1	1.17627	0.000172236	TE	TE	1.07464	0.00214428	-0.115576	0.558832	1.01458	0.0103862	0.0740295	0.842586	translation
ENSMUSG00000057649	Brd9	-0.874792	0.000330841	-0.120258	1	-0.995049	1.29347e-05	TE	TE	-1.00586	0.000763989	-0.196724	0.184124	-1.03253	0.00587133	-0.238006	0.412032	translation
ENSMUSG00000069833	Ahnak	1.37352	0.000330841	-0.0435865	1	1.32993	3.80769e-06	TE	TE	1.21266	0.00177966	-0.139934	0.55565	1.34906	0.00166906	-0.646043	0.0638065	translation
ENSMUSG00000020849	Ywhae	-0.879683	0.000333174	-0.299326	1	-1.17901	2.52563e-10	TE	TE	-1.19058	7.10471e-05	-0.401228	0.0478021	-1.25217	0.000939514	-0.628972	0.283291	translation
ENSMUSG00000026603	Smyd2	-0.673301	0.000333174	0.170703	1	-0.502598	0.0734167	TE	TE	-0.517847	0.00837833	0.121159	0.373952	-0.560981	0.0151406	0.262881	0.264667	translation
ENSMUSG00000035284	Vps13c	1.01301	0.000333411	0.103391	1	1.1164	2.20758e-06	TE	TE	1.11146	0.000228382	0.037393	0.866285	1.09919	0.001557	-0.283653	0.555426	translation
ENSMUSG00000046230	Vps13a	1.30923	0.000419028	-0.312224	1	0.997011	0.00533581	TE	TE	0.877045	0.0109943	-0.341164	0.104354	0.502294	0.140105	0.0113722	0.970445	background
ENSMUSG00000030591	Psmd8	-0.938373	0.000424741	0.301719	1	-0.636654	0.05674	TE	TE	-0.634823	0.0161513	0.171131	0.406405	-0.696391	0.0253828	0.328816	0.291098	translation
ENSMUSG00000033004	Mycbp2	1.32598	0.000424741	-0.0858707	1	1.24011	8.31031e-05	TE	TE	1.26919	0.00273731	-0.151576	0.349126	1.33162	0.0106715	-0.215653	0.413599	translation
ENSMUSG00000001445	Mrpl10	-0.85194	0.000454543	-0.0313241	1	-0.883264	7.20826e-05	TE	TE	-0.905731	0.000585798	-0.258046	0.447008	-0.951934	0.00236845	-0.90415	0.247035	translation
ENSMUSG00000028382	Ptbp3	1.18427	0.000534319	0.410791	0.969509	1.59506	4.14786e-08	TE	TE	1.69256	0.00156165	0.105959	0.833876	1.67046	0.00676386	-0.235292	0.808347	translation
ENSMUSG00000028447	Dctn3	-0.91777	0.000534319	0.140203	1	-0.777567	0.00244392	TE	TE	-0.811234	0.00252793	-0.0771605	0.835689	-0.80434	0.00924388	0.132988	0.867284	translation
ENSMUSG00000030057	Cnbp	-0.667531	0.000534319	-0.0446784	1	-0.712209	0.000210796	TE	TE	-0.738724	0.00145164	-0.205292	0.405588	-0.725071	0.00705523	-0.0661581	0.922046	translation
ENSMUSG00000030655	Smg1	1.28574	0.000534319	-0.257558	1	1.02818	0.00279382	TE	TE	0.92398	0.00493585	-0.306138	0.149018	0.853596	0.0324377	-0.206129	0.580939	translation
ENSMUSG00000033916	Chmp2a	-0.667755	0.000534319	0.0449844	1	-0.622771	0.00480835	TE	TE	-0.638203	0.00190578	-0.308604	0.566746	-0.616417	0.00777724	0.973895	0.498608	translation
ENSMUSG00000034203	Chchd4	-0.975143	0.000534319	-0.149656	1	-1.1248	2.55033e-06	TE	TE	-1.14123	0.000228382	-0.269227	0.15921	-1.07227	0.0034615	-0.0583688	0.909765	translation
ENSMUSG00000034973	Dop1a	1.10909	0.000534319	-0.287253	1	0.821842	0.0269495	TE	TE	0.861978	0.0164631	-0.324042	0.0630257	0.94448	0.0571563	-0.365184	0.153392	background
ENSMUSG00000036748	Cuedc2	-0.751213	0.000534319	-0.120876	1	-0.872089	4.24495e-06	TE	TE	-0.888791	0.000436796	-0.414781	0.338601	-0.921285	0.00236845	-1.02974	0.378985	translation
ENSMUSG00000055670	Zzef1	1.07839	0.000534319	-0.0553537	1	1.02304	0.000206217	TE	TE	0.94232	0.00530086	-0.117781	0.414669	0.984142	0.0164557	-0.161823	0.462825	translation
ENSMUSG00000021313	Ryr2	0.858014	0.00057389	-0.647646	0.0373915	0.210369	1	Unchanged		0.206911	0.353332	-0.734339	0.00121625	0.201757	0.634662	-0.733174	0.012947	buffering
ENSMUSG00000024870	Rab1b	-0.64204	0.00057389	-0.052345	1	-0.694385	0.000311957	TE	TE	-0.727787	0.00158723	-0.262647	0.39722	-0.714867	0.00757175	-0.0903572	0.916047	translation
ENSMUSG00000030102	Itpr1	1.2909	0.000586304	0.227507	1	1.51841	2.72545e-07	TE	TE	1.40493	0.000379594	0.141785	0.473028	1.29309	0.00274351	-0.221294	0.552723	translation
ENSMUSG00000026966	Ssna1	-1.04893	0.000621283	0.245289	1	-0.803639	0.0171839	TE	TE	-0.86895	0.00378815	0.152079	0.376804	-0.882173	0.0142568	0.178164	0.550816	translation
ENSMUSG00000019471	Cdc37	-0.556195	0.000634204	-0.156838	1	-0.713034	6.90055e-06	TE	TE	-0.733008	0.000938833	-0.260216	0.108486	-0.827324	0.00263853	-0.644847	0.0888196	translation
ENSMUSG00000020219	Timm13	-1.02121	0.000634204	0.27215	1	-0.749063	0.0086454	TE	TE	-0.798215	0.00390194	0.358041	0.118682	-1.03633	0.00249911	0.87602	0.0204173	translation
ENSMUSG00000031093	Dock11	1.79168	0.000634204	0.483524	0.662639	2.27521	3.58939e-06	TE	TE	1.82862	0.00384637	0.412046	0.0230514	0.970541	0.216438	0.183218	0.456859	abundance
ENSMUSG00000024309	Pfdn6	-1.01457	0.000635892	-0.19035	1	-1.20492	2.64251e-07	TE	TE	-1.24231	6.05562e-05	-0.354587	0.159523	-1.21342	0.000911244	-0.149657	0.868217	translation
ENSMUSG00000022912	Pros1	0.839245	0.000792938	0.568548	0.0956864	1.40779	3.17682e-12	TE	TE	1.40591	5.6801e-05	0.521578	0.00382321	0.922895	0.0178637	0.0204341	0.958482	translation
ENSMUSG00000030180	Kdm5a	0.981447	0.000792938	-0.331237	1	0.65021	0.0958595	TE	TE	0.602084	0.0564395	-0.443012	0.0243535	0.978311	0.0299578	-0.597097	0.0269345	translation
ENSMUSG00000036214	Znrd1as	-1.2833	0.000792938	-0.237637	1	-1.52094	2.2598e-06	TE	TE	-1.70121	0.00130424	-0.287025	0.098326	-2.20643	0.001557	-0.594582	0.0351001	translation
ENSMUSG00000040842	Szrd1	-1.10384	0.000792938	0.291179	1	-0.812657	0.012359	TE	TE	-0.843353	0.00757701	0.30157	0.0689441	-0.935417	0.028964	0.365614	0.158174	translation
ENSMUSG00000036053	Fmnl2	1.49602	0.00080165	-0.0904576	1	1.40557	0.00177118	TE	TE	1.16959	0.0066006	-0.0618988	0.769005	1.14938	0.0208443	0.0102341	0.976618	translation
ENSMUSG00000007721	Ccdc124	-0.971215	0.000803777	0.137343	1	-0.833872	0.0025318	TE	TE	-0.851925	0.00314654	-0.100876	0.797225	-0.84662	0.0111187	0.0120291	0.98755	translation
ENSMUSG00000025278	Flnb	1.10592	0.000803777	-0.325563	1	0.780361	0.0260418	TE	TE	0.727032	0.0098491	-0.397407	0.0566617	0.994222	0.00757175	-0.701954	0.0311938	translation
ENSMUSG00000036707	Cab39	-0.766873	0.000803777	-0.362235	1	-1.12911	1.42688e-09	TE	TE	-1.18908	0.000100817	-0.574815	0.0783613	-1.09798	0.00215259	0.0373586	0.97235	translation
ENSMUSG00000045752	Tssc4	-1.21712	0.000803777	0.594351	0.360155	-0.622767	0.218032	TE	TE	-0.600923	0.0143483	0.453267	0.101283	-0.551584	0.0653018	0.331686	0.480983	background
ENSMUSG00000021156	Zmynd11	-0.571516	0.000837536	-0.110328	1	-0.681844	0.00030141	TE	TE	-0.730523	0.00205348	-0.223385	0.197092	-0.722797	0.0108455	-0.199028	0.596255	translation
ENSMUSG00000062691	Cebpzos	-1.44502	0.00083759	-0.279869	1	-1.72489	5.4884e-08	TE	TE	-1.94188	0.000428743	-0.256263	0.180636	-2.11271	0.00264017	-0.440398	0.227297	translation
ENSMUSG00000047459	Dynlrb1	-1.14494	0.000854107	0.125659	1	-1.01928	0.000528103	TE	TE	-1.08148	0.00381346	0.0872734	0.64019	-1.11433	0.0115046	0.174893	0.559858	translation
ENSMUSG00000020721	Helz	1.03466	0.000882307	-0.397272	1	0.637384	0.158114	TE	TE	0.554848	0.0497468	-0.437891	0.00491802	0.657257	0.213545	-0.457375	0.0281166	buffering
ENSMUSG00000051319	Mtln	-1.21696	0.000882307	0.0848118	1	-1.13215	6.65454e-05	TE	TE	-1.16334	0.00027635	0.0193088	0.942871	-1.1638	0.00192509	0.0467359	0.942393	translation
ENSMUSG00000026887	Mrrf	-0.882303	0.000901861	-0.208241	1	-1.09054	2.37464e-06	TE	TE	-1.11965	0.000758665	-0.184942	0.291758	-1.04315	0.00705028	-0.0193721	0.959797	translation
ENSMUSG00000038774	Ascc3	1.17859	0.000993141	0.076999	1	1.25558	0.000136809	TE	TE	1.09475	0.00337734	0.0699305	0.72254	1.10974	0.0112451	0.128649	0.702861	translation
ENSMUSG00000034163	Zfc3h1	1.10651	0.0010951	-0.221239	1	0.885268	0.0138128	TE	TE	0.796976	0.019149	-0.348556	0.118282	0.899393	0.0404886	-0.446657	0.181116	translation
ENSMUSG00000019841	Rev3l	1.58935	0.0013183	0.0179531	1	1.6073	0.000598274	TE	TE	1.23737	0.00699357	0.0318386	0.8762	1.25204	0.017906	0.111001	0.721536	translation
ENSMUSG00000030647	Ndufc2	-1.18766	0.0013183	-0.211639	1	-1.3993	4.40148e-07	TE	TE	-1.33628	0.00139713	-0.241081	0.105773	-1.00012	0.0320767	-0.0372326	0.889321	translation
ENSMUSG00000037119	Fam91a1	1.24682	0.00132369	0.22258	1	1.4694	7.30508e-05	TE	TE	1.29684	0.0014367	0.213484	0.165065	1.18128	0.0163644	0.120704	0.663462	translation
ENSMUSG00000019978	Epb41l2	0.990016	0.00140851	0.259599	1	1.24961	1.97772e-07	TE	TE	1.27523	0.000234698	0.0422619	0.911606	1.267	0.001557	-0.427433	0.608455	translation
ENSMUSG00000025159	Mms19	0.959252	0.00163985	0.296462	1	1.25571	3.72889e-06	TE	TE	1.24755	0.000329027	0.195779	0.249026	1.19891	0.00386402	0.0916644	0.818802	translation
ENSMUSG00000020946	Gosr2	-0.738327	0.00164708	0.356209	1	-0.382118	0.736593	TE	TE	-0.407605	0.0473563	0.135126	0.685538	-0.419174	0.0747691	0.284457	0.586954	background
ENSMUSG00000026425	Srgap2	0.976755	0.00168386	0.254835	1	1.23159	6.32537e-06	TE	TE	1.12374	0.000597582	0.121671	0.578299	1.01787	0.00204016	-0.51562	0.121245	translation
ENSMUSG00000046743	Fat4	1.70445	0.00168386	0.444564	1	2.14901	1.51692e-07	TE	TE	2.21163	0.001295	0.373136	0.161727	1.90208	0.014981	0.0542928	0.919633	translation
ENSMUSG00000061751	Kalrn	0.923239	0.00168386	-0.177293	1	0.745946	0.0220947	TE	TE	0.785728	0.0109612	-0.318686	0.159523	0.816924	0.0342833	-0.364799	0.32124	translation
ENSMUSG00000000787	Ddx3x	0.455829	0.00173545	-0.286325	1	0.169504	1	TE	TE	0.142465	0.404225	-0.329818	0.0205968	0.118506	0.606184	-0.315672	0.0786553	background
ENSMUSG00000024754	Cemip2	1.24479	0.00173545	0.114212	1	1.35901	0.000107976	TE	TE	1.26417	0.00195141	0.0687488	0.758195	1.15959	0.001557	-0.496524	0.0443299	translation
ENSMUSG00000040325	Dcaf1	0.633227	0.00174536	-0.0693654	1	0.563862	0.0674406	TE	TE	0.550384	0.0125816	-0.0765916	0.559574	0.53098	0.0364548	-0.0362175	0.870752	translation
ENSMUSG00000034297	Med13	1.08373	0.00182406	-0.191447	1	0.892284	0.0156653	TE	TE	0.71124	0.128463	-0.28271	0.0781596	0.767361	0.258096	-0.292532	0.154382	background
ENSMUSG00000073002	Vamp5	-0.732485	0.0019094	0.33765	1	-0.394835	0.662104	TE	TE	-0.41962	0.0233541	0.293572	0.0683966	-0.435639	0.0559013	0.329527	0.248651	background
ENSMUSG00000036273	Lrrk2	1.328	0.00192297	0.390361	1	1.71836	6.5508e-07	TE	TE	1.66839	0.000437358	-0.0024207	0.997654	1.66923	0.00100374	-1.63516	0.142683	translation
ENSMUSG00000001794	Capns1	-0.557743	0.00196213	-0.030427	1	-0.588169	0.00482165	TE	TE	-0.613156	0.00486232	-0.102261	0.471366	-0.562637	0.0209469	0.0607791	0.817701	translation
ENSMUSG00000039221	Rpl22l1	-1.1246	0.00206644	0.0848422	1	-1.03975	0.000728479	TE	TE	-1.02269	0.00112465	-0.0530298	0.840822	-0.996613	0.00381633	0.417601	0.344332	translation
ENSMUSG00000031660	Brd7	-0.698299	0.00216776	-0.341351	1	-1.03965	7.07054e-08	TE	TE	-1.08555	0.000521146	-0.312991	0.046624	-1.39211	0.00114258	-0.64991	0.0292351	translation
ENSMUSG00000036504	Phpt1	-0.932993	0.00224263	-0.179349	1	-1.11234	2.71028e-06	TE	TE	-1.12423	0.00118961	-0.12218	0.552262	-1.08675	0.0066819	0.0247576	0.954341	translation
ENSMUSG00000038619	Ensa	-0.892084	0.00226715	0.0623896	1	-0.829695	0.00251114	TE	TE	-0.839994	0.00179575	-0.158672	0.63857	-0.854156	0.00670958	-0.362134	0.610183	translation
ENSMUSG00000008348	Ubc	-0.894653	0.00228216	-0.0124314	1	-0.907084	0.000188037	TE	TE	-0.920298	0.00163308	-0.0461127	0.824146	-0.933146	0.00597917	-0.198966	0.598166	translation
ENSMUSG00000038608	Dock10	1.70557	0.00228216	0.706167	0.0994681	2.41174	4.55091e-07	TE	TE	2.42858	0.000990953	0.425249	0.322996	2.17556	0.00770394	-0.192245	0.822539	translation
ENSMUSG00000033237	Arid2	1.01329	0.00236288	-0.0724275	1	0.940863	0.00438434	TE	TE	0.986621	0.00256842	-0.0397004	0.853062	0.950304	0.00573917	0.340862	0.23687	translation
ENSMUSG00000027593	Raly	-0.763204	0.00238769	0.0439929	1	-0.719211	0.0031322	TE	TE	-0.748149	0.00486232	-0.328279	0.575075	-0.689499	0.0153492	0.697365	0.463398	translation
ENSMUSG00000039831	Arhgap29	1.0496	0.00238769	-0.0653537	1	0.984247	0.00194079	TE	TE	0.893388	0.0125959	-0.136318	0.427429	1.12154	0.00382914	-0.406961	0.0493263	translation
ENSMUSG00000058006	Mdn1	1.38357	0.00238769	0.0914572	1	1.47503	6.83032e-05	TE	TE	1.35801	0.00486232	-0.143315	0.728583	1.45896	0.00470483	-0.834692	0.121245	translation
ENSMUSG00000003423	Pih1d1	-0.841514	0.00239858	0.241808	1	-0.599706	0.0901682	TE	TE	-0.61225	0.0187997	0.259605	0.0865266	-0.70817	0.0413016	0.326215	0.14365	translation
ENSMUSG00000007656	Arpp19	-0.766468	0.00239858	-0.0893724	1	-0.855841	0.000156118	TE	TE	-0.849365	0.00213892	-0.174687	0.242868	-0.869964	0.0105475	-0.207676	0.440013	translation
ENSMUSG00000024048	Myl12a	-1.10737	0.00239858	0.306536	1	-0.800834	0.0263577	TE	TE	-0.865105	0.0114803	0.16469	0.498482	-1.05137	0.00249911	0.652997	0.0204173	translation
ENSMUSG00000028741	Mrto4	-1.16565	0.00239858	0.200671	1	-0.964982	0.00526236	TE	TE	-1.06207	0.00190998	0.152735	0.472344	-1.1436	0.00470483	0.4143	0.248946	translation
ENSMUSG00000037710	Cisd1	-0.746872	0.00239858	-0.238432	1	-0.985304	8.47447e-07	TE	TE	-0.999756	0.000413433	-0.233744	0.168339	-0.837937	0.00573917	0.205646	0.539051	translation
ENSMUSG00000041828	Abca8a	1.51477	0.00239858	0.520749	0.968047	2.03552	2.48541e-09	TE	TE	1.88369	0.000496246	0.391839	0.218858	1.63165	0.00591713	-0.197341	0.763506	translation
ENSMUSG00000015697	Setdb1	0.952796	0.00260809	-0.0791373	1	0.873658	0.0231941	TE	TE	0.91357	0.00651119	-0.174241	0.301494	1.08315	0.0078897	-0.375103	0.125898	translation
ENSMUSG00000029632	Ndufa4	-0.8285	0.00272503	-0.613313	0.111891	-1.44181	2.34691e-14	TE	TE	-1.47355	5.68888e-05	-0.774391	0.0092282	-1.71301	0.000849501	-1.40343	0.0639572	translation
ENSMUSG00000053453	Thoc7	-0.628621	0.00272503	-0.11577	1	-0.744391	0.000393198	TE	TE	-0.759646	0.0015782	-0.212872	0.215107	-0.844003	0.00404532	-0.496875	0.145154	translation
ENSMUSG00000020936	Nmt1	-0.575195	0.00293312	0.202322	1	-0.372873	0.691345	TE	TE	-0.396731	0.0596584	0.141038	0.296087	-0.486641	0.0544137	0.231234	0.193258	background
ENSMUSG00000027878	Notch2	0.984743	0.00293312	0.533249	0.418204	1.51799	6.76439e-10	TE	TE	1.45403	0.000129048	0.349753	0.23674	1.28094	0.001557	-0.538917	0.396306	translation
ENSMUSG00000037646	Vps13b	1.10745	0.00293312	-0.287349	1	0.8201	0.0485448	TE	TE	0.617577	0.217862	-0.373962	0.04517	0.153081	0.846925	-0.30508	0.163285	background
ENSMUSG00000033272	Slc35a4	-1.19449	0.00297378	0.360255	1	-0.834231	0.0450992	TE	TE	-0.805165	0.00593154	0.184626	0.523194	-0.860944	0.0117159	0.486398	0.300704	translation
ENSMUSG00000062270	Morf4l1	-0.97605	0.00297378	0.0475369	1	-0.928513	0.00213537	TE	TE	-0.924506	0.00230206	0.113249	0.660869	-0.924501	0.00915056	0.113206	0.830844	translation
ENSMUSG00000037270	4932438A13Rik	1.09764	0.00309221	-0.396025	1	0.701615	0.117013	TE	TE	0.663534	0.0325375	-0.45039	0.0406664	0.508605	0.224924	-0.34561	0.259562	background
ENSMUSG00000020133	2310011J03Rik	-1.15869	0.0030979	0.648628	0.258551	-0.510066	0.736593	TE	TE	-0.553118	0.0525414	0.769023	0.0215717	-0.474152	0.240188	0.689257	0.138168	background
ENSMUSG00000036202	Rif1	1.11089	0.00310069	-0.22227	1	0.88862	0.0207795	TE	TE	1.04714	0.0140654	-0.382117	0.158857	1.23545	0.0221565	-0.58656	0.145461	translation
ENSMUSG00000024782	Ak3	-0.718582	0.00311903	-0.211234	1	-0.929816	5.75782e-06	TE	TE	-0.965285	0.00105171	-0.374303	0.117883	-0.962005	0.00812268	-0.364713	0.478515	translation
ENSMUSG00000024758	Rtn3	0.768144	0.00340503	-0.347726	1	0.420418	0.579925	TE	TE	0.386656	0.0664587	-0.36185	0.0363181	0.581656	0.0354415	-0.523367	0.0319249	translation
ENSMUSG00000024251	Thada	0.919354	0.00341173	-0.0557888	1	0.863566	0.0117882	TE	TE	0.945552	0.00377831	-0.173632	0.419864	1.00881	0.00987524	-0.344186	0.340254	translation
ENSMUSG00000020196	Cabin1	0.943045	0.00344453	-0.0584625	1	0.884582	0.00499599	TE	TE	0.964489	0.00890374	-0.14141	0.371525	1.00933	0.0250522	-0.183753	0.439185	translation
ENSMUSG00000036550	Cnot1	1.11009	0.00344453	-0.171398	1	0.938688	0.00522115	TE	TE	0.943032	0.0137686	-0.299546	0.276112	1.18663	0.00757175	-0.699572	0.0577562	translation
ENSMUSG00000078566	Bnip3	-1.81126	0.00344453	-0.565876	1	-2.37714	2.08611e-09	TE	TE	-2.2835	9.26458e-05	-0.614493	0.161727	-1.86225	0.000849501	1.04431	0.181537	translation
ENSMUSG00000039801	Cplane1	1.34071	0.0036041	0.0496224	1	1.39033	0.00264347	TE	TE	1.40316	0.000302541	0.0562916	0.814412	1.38259	0.00204016	-0.198107	0.691309	translation
ENSMUSG00000053580	Tanc2	1.27928	0.0036041	0.617669	0.131919	1.89695	1.6713e-06	TE	TE	1.79134	4.47994e-05	0.529785	0.00709517	1.16852	0.00952922	-0.114129	0.774292	translation
ENSMUSG00000050310	Rictor	0.998161	0.00370736	-0.153676	1	0.844485	0.0286422	TE	TE	0.73684	0.0485881	-0.224519	0.176935	0.593903	0.205967	-0.158793	0.483001	background
ENSMUSG00000001418	Glmp	0.866444	0.00385998	0.350592	1	1.21704	8.43901e-07	TE	TE	1.16498	0.000162125	0.114454	0.746811	1.15392	0.00127968	-0.210907	0.83362	translation
ENSMUSG00000029775	Klhdc10	-0.654462	0.00385998	-0.0666065	1	-0.721068	0.00210479	TE	TE	-0.76166	0.00123734	-0.149154	0.351349	-0.724203	0.00757175	0.0151346	0.969916	translation
ENSMUSG00000022672	Prkdc	1.24328	0.00387601	0.0770427	1	1.32033	0.00038438	TE	TE	1.19671	0.00585931	0.0183637	0.94043	1.18776	0.0163877	-0.110628	0.763506	translation
ENSMUSG00000024369	Nelfe	-0.92987	0.00387601	0.28018	1	-0.64969	0.153782	TE	TE	-0.625946	0.0258392	0.1663	0.357582	-0.721164	0.0304127	0.302246	0.226553	translation
ENSMUSG00000026275	Ppp1r7	-0.800559	0.00390503	-0.0386514	1	-0.83921	0.000749861	TE	TE	-0.897437	0.00170619	-0.207811	0.386256	-1.00264	0.00264017	-0.711804	0.0880523	translation
ENSMUSG00000042744	Hectd4	1.17863	0.00427386	-0.151979	1	1.02665	0.00295299	TE	TE	1.17061	0.00703678	-0.215609	0.223438	1.22937	0.0247847	-0.260271	0.346238	translation
ENSMUSG00000034422	Parp14	1.08399	0.00439344	0.397655	1	1.48165	5.00894e-07	TE	TE	1.4044	0.000784425	0.28653	0.172462	1.15402	0.0100693	-0.108188	0.790265	translation
ENSMUSG00000090112	Shprh	0.89164	0.00451475	-0.0178665	1	0.873773	0.00702758	TE	TE	0.817181	0.0110442	-0.160112	0.487405	0.837656	0.0282285	-0.214467	0.562117	translation
ENSMUSG00000024542	Cep192	1.71007	0.00471101	0.489541	0.895019	2.19961	6.42372e-05	TE	TE	1.95751	0.00576551	0.236273	0.534375	1.65465	0.0119724	-0.454822	0.320208	translation
ENSMUSG00000043716	Rpl7	-1.81997	0.00471101	0.144043	1	-1.67592	0.000442162	TE	TE	-1.84576	0.0436426	-0.0242183	0.945279	-1.83263	0.0818057	0.062321	0.897298	background
ENSMUSG00000020745	Pafah1b1	0.570879	0.00475295	-0.061238	1	0.509641	0.0663094	TE	TE	0.474455	0.0242847	-0.0938984	0.394904	0.576491	0.027555	-0.154699	0.276837	translation
ENSMUSG00000021484	Lman2	-0.60928	0.00479325	0.258073	1	-0.351207	0.864634	TE	TE	-0.351106	0.0525447	0.226404	0.134192	-0.414785	0.0576547	0.353975	0.132921	background
ENSMUSG00000027272	Ubr1	0.78905	0.00479325	-0.121831	1	0.667219	0.0426189	TE	TE	0.692646	0.0125816	-0.163893	0.330554	0.811919	0.014189	-0.34011	0.156905	translation
ENSMUSG00000033808	Tmem87a	0.666627	0.00479325	0.0867879	1	0.753415	0.00594277	TE	TE	0.704842	0.00273731	0.0294258	0.846597	0.718403	0.00793526	0.171397	0.486605	translation
ENSMUSG00000040720	Virma	0.819064	0.00479325	0.0475945	1	0.866658	0.00211215	TE	TE	0.834311	0.00754636	-0.0235588	0.893982	0.860011	0.0111495	-0.2278	0.301941	translation
ENSMUSG00000049751	Rpl36al	-1.3909	0.00479325	0.410235	1	-0.980663	0.0193006	TE	TE	-1.05889	0.00859951	0.396344	0.0718463	-1.30622	0.0153492	0.58502	0.0834286	translation
ENSMUSG00000018143	Mafk	-1.35014	0.00489502	0.162607	1	-1.18753	0.00168266	TE	TE	-1.18143	0.00263093	0.152636	0.653558	-1.22424	0.00782076	0.439784	0.446576	translation
ENSMUSG00000068749	Psma5	-0.940252	0.00493167	0.385221	1	-0.555032	0.286354	TE	TE	-0.568207	0.0237547	0.3301	0.0503285	-0.790276	0.0197306	0.497215	0.0429384	translation
ENSMUSG00000028514	Usp24	0.787832	0.00494535	0.0765306	1	0.864362	0.000602839	TE	TE	0.914366	0.00460594	-0.0162726	0.934697	0.918725	0.0138171	-0.0850667	0.78909	translation
ENSMUSG00000036860	Mrpl55	-0.942437	0.00528749	-0.322149	1	-1.26459	5.92087e-07	TE	TE	-1.20287	0.000666628	-0.442103	0.0364409	-0.944162	0.0217305	-0.10162	0.815828	translation
ENSMUSG00000021969	Zdhhc20	1.75154	0.00559413	0.189278	1	1.94082	0.000241793	TE	TE	1.74397	0.00948822	0.253251	0.343883	2.11067	0.0066819	0.609825	0.0888196	translation
ENSMUSG00000029440	Psmd9	-0.767758	0.00559413	0.273014	1	-0.494745	0.301224	TE	TE	-0.526273	0.0190027	0.158158	0.348726	-0.448452	0.071411	-0.0204657	0.944075	background
ENSMUSG00000037110	Ralgapa2	1.04449	0.00562537	-0.398291	1	0.646202	0.199979	TE	TE	0.60428	0.0317314	-0.461227	0.0401385	0.499888	0.185591	-0.374401	0.24173	background
ENSMUSG00000039601	Rcan2	-0.455943	0.00562537	-0.290392	1	-0.746336	6.78724e-07	TE	TE	-0.761588	0.000800967	-0.451471	0.0623267	-0.778177	0.00526013	-0.552622	0.405415	translation
ENSMUSG00000040054	Baz2a	0.759431	0.00562537	-0.25823	1	0.501202	0.260272	TE	TE	0.573459	0.0392311	-0.381188	0.0773074	0.556775	0.126105	-0.365808	0.240678	background
ENSMUSG00000042185	Nfrkb	0.98722	0.00562537	0.191605	1	1.17882	0.000674892	TE	TE	1.04772	0.000755093	0.149638	0.379417	1.08812	0.00381633	0.261351	0.434346	translation
ENSMUSG00000002064	Sdf2	-0.73656	0.00578669	0.156022	1	-0.580538	0.0613809	TE	TE	-0.625508	0.0163124	0.18473	0.298097	-0.513155	0.0740242	-0.00101311	0.997642	background
ENSMUSG00000034432	Cops8	-0.607366	0.00580118	-0.00368737	1	-0.611054	0.0123116	TE	TE	-0.646868	0.00395143	-0.137862	0.503917	-0.640363	0.0139319	-0.0912613	0.842563	translation
ENSMUSG00000038146	Notch3	0.882629	0.00580118	0.778214	0.0140839	1.66084	2.75461e-13	RNA+Ribo	concordant (intensified)	1.70444	4.61809e-05	0.681662	0.00421606	1.77623	0.00325402	0.776102	0.168995	translation
ENSMUSG00000045962	Wnk1	1.00259	0.00591049	-0.0975521	1	0.905034	0.00410978	TE	TE	0.827321	0.0148154	-0.175041	0.262752	1.03125	0.0129154	-0.329521	0.121245	translation
ENSMUSG00000020900	Myh10	1.42481	0.00601436	0.179827	1	1.60464	2.8693e-05	TE	TE	1.40179	0.00620165	0.0298827	0.923303	1.36101	0.00455496	-0.524951	0.101995	translation
ENSMUSG00000022723	Crybg3	0.786661	0.00601436	0.0841043	1	0.870765	0.000842736	TE	TE	0.809241	0.00527852	0.0358844	0.824631	0.795067	0.0164557	-0.0387866	0.886219	translation
ENSMUSG00000024451	Arap3	1.07749	0.00601436	0.152737	1	1.23023	0.000165485	TE	TE	1.26992	0.00092113	-0.0549033	0.893571	1.26952	0.00460103	-0.0418923	0.961309	translation
ENSMUSG00000042207	Kdm5b	0.76041	0.006079	0.154105	1	0.914514	0.000642021	TE	TE	0.898407	0.00212069	0.112882	0.454355	0.815987	0.0119724	-0.0596666	0.828031	translation
ENSMUSG00000052812	Atad2b	1.22944	0.0061918	-0.420699	1	0.808741	0.19515	TE	TE	0.937062	0.0258999	-0.421637	0.0387212	1.18261	0.0510834	-0.520462	0.0715268	background
ENSMUSG00000060675	Pla2g16	-0.827743	0.0062984	0.111831	1	-0.715911	0.0167501	TE	TE	-0.7773	0.00752508	0.104962	0.611902	-0.881923	0.00404532	0.516595	0.044637	translation
ENSMUSG00000018830	Myh11	1.13398	0.00659079	-0.528012	0.827763	0.60597	0.317246	TE	TE	0.548413	0.0943354	-0.54744	0.0413464	0.586904	0.203923	-0.570585	0.114284	background
ENSMUSG00000020620	Abca8b	1.24839	0.00672171	0.244281	1	1.49267	2.92791e-05	TE	TE	1.4415	0.00139638	0.21158	0.39064	1.2521	0.00788789	-0.243192	0.543374	translation
ENSMUSG00000067851	Arfgef1	0.794509	0.00672901	-0.301975	1	0.492534	0.414221	TE	TE	0.468973	0.0556172	-0.368098	0.0415275	0.414224	0.216873	-0.331572	0.185908	background
ENSMUSG00000028419	Chmp5	-0.786938	0.00676261	0.117202	1	-0.669735	0.0388693	TE	TE	-0.798314	0.0140108	0.136919	0.435958	-0.84685	0.0296011	0.206091	0.427336	translation
ENSMUSG00000005813	Metap1	-0.524702	0.00681611	-0.0906816	1	-0.615384	0.00535337	TE	TE	-0.622838	0.00723628	-0.118348	0.329706	-0.731116	0.0106715	-0.230796	0.183048	translation
ENSMUSG00000004356	Utp20	1.03695	0.00705922	0.107968	1	1.14492	0.000469607	TE	TE	1.13902	0.00320141	0.110981	0.615354	1.10023	0.0131818	-0.0192638	0.962816	translation
ENSMUSG00000019362	D8Ertd738e	-0.636725	0.00705922	-0.0612061	1	-0.697932	0.00270594	TE	TE	-0.714134	0.00220038	-0.122526	0.402523	-0.76595	0.00608104	-0.291971	0.273923	translation
ENSMUSG00000022443	Myh9	1.69043	0.00705922	0.122875	1	1.8133	1.56821e-05	TE	TE	1.51963	0.00735239	0.0149942	0.963913	1.49829	0.00629419	-0.479712	0.150702	translation
ENSMUSG00000028863	Meaf6	-0.872647	0.00705922	-0.0997996	1	-0.972446	0.000712818	TE	TE	-0.937759	0.000390582	-0.124076	0.435294	-0.962526	0.00243633	-0.244157	0.499551	translation
ENSMUSG00000037475	Thoc2	1.29136	0.00705922	-0.367248	1	0.924109	0.0439484	TE	TE	0.889212	0.0611168	-0.354636	0.067021	0.801168	0.230148	-0.328492	0.205047	background
ENSMUSG00000037851	Iars	0.597431	0.00708181	-0.0985227	1	0.498908	0.257617	TE	TE	0.489189	0.0174922	-0.243344	0.301494	0.592964	0.0113306	-0.765689	0.0311938	translation
ENSMUSG00000039768	Dnajc11	-0.592761	0.00722674	-0.104213	1	-0.696974	0.00150864	TE	TE	-0.688433	0.00245988	-0.216514	0.215648	-0.643364	0.0141776	-0.0530186	0.898642	translation
ENSMUSG00000059734	Ndufs8	-0.809299	0.00722674	-0.539003	0.415769	-1.3483	7.18012e-10	TE	TE	-1.33429	0.000159564	-0.659914	0.00421606	-1.28166	0.0109855	-0.59702	0.216083	translation
ENSMUSG00000004221	Ikbkg	-0.595262	0.00727881	-0.12216	1	-0.717421	0.000867007	TE	TE	-0.726139	0.0011551	-0.381181	0.313371	-0.694031	0.00640588	0.223018	0.843979	translation
ENSMUSG00000031505	Naxd	-0.61567	0.00729601	0.165414	1	-0.450255	0.357679	TE	TE	-0.469889	0.0207381	0.0905586	0.552127	-0.474373	0.0443387	0.106754	0.670826	translation
ENSMUSG00000025532	Crcp	-0.987182	0.00732907	0.665992	0.130371	-0.32119	1	TE	TE	-0.33249	0.250966	0.663872	0.00142491	-0.00444318	0.994149	0.618364	0.0160835	buffering
ENSMUSG00000027011	Ube2e3	-0.788865	0.00746689	-0.055181	1	-0.844046	0.00380003	TE	TE	-0.929991	0.00386527	-0.097844	0.505461	-0.892704	0.0172771	-0.0414209	0.873819	translation
ENSMUSG00000016528	Mapkapk2	-0.522523	0.00758709	-0.683236	0.000724785	-1.20576	3.87425e-17	RNA+Ribo	concordant (intensified)	-1.21507	1.27242e-05	-0.832566	0.00382321	-1.26304	0.000623072	-1.45504	0.331065	translation
ENSMUSG00000034480	Diaph2	0.929236	0.0077368	-0.382332	1	0.546904	0.370601	TE	TE	0.40684	0.176709	-0.355385	0.0964464	0.144748	0.713477	-0.221255	0.374405	background
ENSMUSG00000037344	Slc12a9	1.76196	0.00773757	0.613577	0.778045	2.37554	5.8103e-06	TE	TE	1.99141	0.000702005	0.552609	0.00886708	1.61139	0.0510834	0.391176	0.267301	abundance
ENSMUSG00000003226	Ranbp2	0.86514	0.00777443	-0.299616	1	0.565524	0.250389	TE	TE	0.499117	0.0846888	-0.357706	0.0850445	0.508468	0.188048	-0.363839	0.196792	background
ENSMUSG00000019370	Calm3	-0.685843	0.00777443	0.218061	1	-0.467782	0.284813	TE	TE	-0.508189	0.0260663	0.0457844	0.873081	-0.515519	0.0479337	0.197925	0.645538	translation
ENSMUSG00000045983	Eif4g1	0.464698	0.00777443	-0.134684	1	0.330014	0.669293	TE	TE	0.299961	0.0960624	-0.199519	0.116936	0.429459	0.0520421	-0.319065	0.0639572	background
ENSMUSG00000037552	Plekhg2	1.11335	0.00807655	0.405326	1	1.51868	1.98886e-05	TE	TE	1.5302	0.000311489	0.42725	0.0465406	1.50903	0.00659734	0.40029	0.376558	translation
ENSMUSG00000024197	Plin3	-0.676734	0.00829732	-0.313099	1	-0.989833	1.00054e-06	TE	TE	-1.02853	0.000171133	-0.441624	0.045675	-1.09591	0.00179991	-0.709411	0.232849	translation
ENSMUSG00000026491	Ahctf1	0.877309	0.00853967	-0.344108	1	0.533201	0.391063	TE	TE	0.562138	0.0469912	-0.45775	0.0600402	0.739217	0.0479723	-0.622967	0.069465	translation
ENSMUSG00000078348	Sf3b5	-0.911945	0.00853967	0.155338	1	-0.756607	0.0266243	TE	TE	-0.787696	0.00809064	0.0393348	0.85311	-0.789072	0.0219762	0.052048	0.887028	translation
ENSMUSG00000091898	Tnnc1	-1.02546	0.00853967	-0.143734	1	-1.1692	6.83032e-05	TE	TE	-1.24747	0.00190998	-0.253593	0.306361	-1.04513	0.0119292	0.20526	0.613927	translation
ENSMUSG00000015961	Adss	1.15088	0.00857069	0.103042	1	1.25392	0.0035504	TE	TE	1.18781	0.0121316	-0.0354974	0.886205	1.2147	0.022599	-0.210552	0.523522	translation
ENSMUSG00000096054	Syne1	0.918723	0.00868353	-0.0118026	1	0.906921	0.00492401	TE	TE	0.962176	0.00390194	-0.0994742	0.652065	0.994213	0.0110572	-0.239559	0.510987	translation
ENSMUSG00000025261	Huwe1	0.964351	0.00875259	-0.225761	1	0.73859	0.0430152	TE	TE	0.810101	0.0203214	-0.308271	0.075056	0.920164	0.0546414	-0.364651	0.145154	background
ENSMUSG00000033253	Szt2	0.995798	0.00875259	-0.287609	1	0.708189	0.217775	TE	TE	0.77252	0.0210062	-0.353935	0.0696205	0.831049	0.0664399	-0.392236	0.172137	background
ENSMUSG00000036114	Rpp25l	-0.869037	0.00895417	0.318156	1	-0.550881	0.261028	TE	TE	-0.575371	0.0179669	0.246869	0.111026	-0.650553	0.0376855	0.318243	0.175238	translation
ENSMUSG00000004945	Tmem242	1.64069	0.00901528	-0.189803	1	1.45089	0.00179622	TE	TE	1.17787	0.0298678	-0.405912	0.268176	0.911907	0.129747	-0.0846603	0.879839	background
ENSMUSG00000026029	Casp8	1.30918	0.00906219	0.410416	1	1.7196	6.83923e-05	TE	TE	1.60448	0.000771205	0.24739	0.32997	1.44987	0.00666891	-0.112283	0.829251	translation
ENSMUSG00000024983	Vti1a	-0.794807	0.00919327	0.044495	1	-0.750312	0.0216852	TE	TE	-0.772418	0.00605947	-0.0122558	0.945713	-0.775228	0.0167774	-0.0614711	0.823915	translation
ENSMUSG00000038290	Smg6	0.883986	0.00959426	-0.0198964	1	0.864089	0.0118915	TE	TE	0.844795	0.00472774	-0.0357044	0.853019	0.887093	0.00404532	-0.40196	0.0782855	translation
ENSMUSG00000025487	Psmd13	-0.414568	0.00962154	0.211466	1	-0.203102	1	TE	TE	-0.232397	0.196779	0.0869612	0.64607	-0.27258	0.154836	0.304715	0.140388	background
ENSMUSG00000016257	Prelid3b	-0.835418	0.00967652	-0.115971	1	-0.95139	0.000538084	TE	TE	-0.972932	0.0061232	-0.118825	0.446515	-0.790899	0.0271615	0.0993854	0.643797	translation
ENSMUSG00000031691	Tnpo2	0.59133	0.00967652	0.462359	0.283541	1.05369	1.22999e-07	TE	TE	1.1419	0.00120975	0.420562	0.00181765	1.13785	0.161249	0.420064	0.026785	abundance
ENSMUSG00000033938	Ndufb7	-0.744441	0.00967652	-0.416819	0.906623	-1.16126	1.84051e-08	TE	TE	-1.22654	0.000182323	-0.60325	0.0475692	-1.47648	0.000654567	-1.52761	0.0309536	translation
ENSMUSG00000005682	Pan2	1.14104	0.00981357	-0.354065	1	0.786974	0.187799	TE	TE	0.666921	0.0556472	-0.515894	0.0508083	0.866263	0.0681121	-0.650255	0.0744595	background
ENSMUSG00000039615	Stub1	-0.517634	0.00981357	-0.0983004	1	-0.615934	0.00478365	TE	TE	-0.637818	0.00299559	-0.0884022	0.551459	-0.564984	0.0110511	0.313465	0.145372	translation
ENSMUSG00000092607	Scnm1	-0.881216	0.00993379	-0.148202	1	-1.02942	0.000343689	TE	TE	-1.12638	0.00261597	-0.126541	0.52559	-1.12834	0.0109928	-0.131606	0.720716	translation
ENSMUSG00000048915	Efna5	1.37561	0.0100304	0.266071	1	1.64168	5.21463e-05	TE	TE	1.54031	0.000118484	0.30554	0.27024	1.59665	0.00101979	0.569719	0.407744	translation
ENSMUSG00000053565	Eif3k	-0.65578	0.0100746	0.071372	1	-0.584408	0.0800193	TE	TE	-0.560414	0.0247172	-0.0749368	0.744642	-0.553028	0.0546225	-0.0253239	0.949026	background
ENSMUSG00000040738	Ints8	0.838047	0.0101551	-0.0076161	1	0.830431	0.0253507	TE	TE	0.667046	0.0402206	-0.0984455	0.589223	0.608773	0.0986855	-0.00682774	0.980308	background
ENSMUSG00000024548	Setbp1	1.07539	0.0105175	-0.263246	1	0.812145	0.119643	TE	TE	0.825269	0.0269715	-0.29873	0.105108	0.985769	0.0472708	-0.385256	0.139682	translation
ENSMUSG00000002524	Puf60	-0.545753	0.0105244	0.23591	1	-0.309843	1	TE	TE	-0.349329	0.0846561	0.124627	0.466983	-0.445952	0.0371243	0.36441	0.0586379	translation
ENSMUSG00000020315	Sptbn1	0.966089	0.0105244	-0.715994	0.136751	0.250095	1	TE	TE	0.210176	0.440513	-0.849811	0.00382062	0.48341	0.258952	-0.91537	0.0144005	buffering
ENSMUSG00000026385	Dbi	-0.710157	0.0105244	-0.38456	1	-1.09472	2.56001e-07	TE	TE	-1.11687	5.68888e-05	-0.697219	0.144204	-1.1279	0.000761152	-0.946292	0.618682	translation
ENSMUSG00000027751	Supt20	1.04078	0.0105516	0.104889	1	1.14566	0.00469589	TE	TE	1.02383	0.0197639	-0.12467	0.744099	0.997866	0.0484803	0.0144921	0.980887	translation
ENSMUSG00000006519	Cyba	-0.800334	0.0105855	0.50321	0.786225	-0.297125	1	TE	TE	-0.338118	0.162057	0.262994	0.48579	-0.289738	0.296466	0.0795675	0.883616	background
ENSMUSG00000033557	Fam20b	-0.782693	0.0105855	0.0591702	1	-0.723523	0.0450237	TE	TE	-0.789901	0.0182383	0.0982522	0.596232	-0.812049	0.0387013	0.141121	0.609451	translation
ENSMUSG00000048960	Prex2	1.16547	0.0105855	-0.326677	1	0.838791	0.0710609	TE	TE	0.938576	0.0451075	-0.431519	0.0616231	1.2755	0.045802	-0.573295	0.0680939	translation
ENSMUSG00000014769	Psmb1	-0.638827	0.0106467	0.160851	1	-0.477976	0.191305	TE	TE	-0.506761	0.0344989	0.0965796	0.511287	-0.538574	0.0567702	0.146521	0.473751	background
ENSMUSG00000057738	Sptan1	0.714346	0.0106467	-0.550613	0.283245	0.163733	1	TE	TE	0.0925745	0.74573	-0.63764	0.0016272	0.524526	0.276934	-0.658218	0.00879855	buffering
ENSMUSG00000054404	Slfn5	1.00476	0.0107066	-0.109034	1	0.895727	0.0241365	TE	TE	0.742813	0.0435462	-0.200788	0.324983	1.05005	0.00590905	-0.483964	0.0312613	translation
ENSMUSG00000016933	Plcg1	0.950336	0.0107971	0.13426	1	1.0846	0.000380644	TE	TE	1.14017	0.00443697	0.0898614	0.642235	1.00779	0.00998108	-0.241023	0.318059	translation
ENSMUSG00000022415	Syngr1	-0.790912	0.0107971	0.188651	1	-0.602261	0.0911998	TE	TE	-0.625287	0.0146012	0.0275276	0.921409	-0.632893	0.0287522	0.238216	0.550748	translation
ENSMUSG00000059890	Ube4a	0.790192	0.0107971	-0.0900656	1	0.700126	0.0569869	TE	TE	0.760671	0.0249466	-0.102281	0.508718	0.757371	0.0615551	-0.0989806	0.658935	background
ENSMUSG00000059895	Ptp4a3	-1.20796	0.0107971	-0.551195	0.745459	-1.75915	4.14786e-08	TE	TE	-1.92376	0.000253304	-0.585659	0.00390707	-0.742264	0.151802	-0.056021	0.846677	abundance
ENSMUSG00000018287	Spag7	-0.673403	0.0108977	-0.200247	1	-0.873651	0.000175784	TE	TE	-0.895707	0.00145164	-0.349318	0.113069	-0.97081	0.00629419	-0.544903	0.217811	translation
ENSMUSG00000025949	Pikfyve	0.970583	0.0108977	-0.0171854	1	0.953398	0.0167633	TE	TE	0.740227	0.056004	-0.138548	0.534375	0.872817	0.0403322	-0.321079	0.228258	translation
ENSMUSG00000020948	Klhl28	0.908205	0.0109433	0.102205	1	1.01041	0.00507713	TE	TE	0.824425	0.0323352	0.105911	0.485902	1.01666	0.0181926	0.241822	0.183041	translation
ENSMUSG00000070327	Rnf213	1.12423	0.0109433	0.631379	0.398933	1.75561	5.51293e-09	TE	TE	1.62078	0.000496246	0.469897	0.144218	1.26678	0.00608104	-0.396371	0.45684	translation
ENSMUSG00000028798	Eif3i	-0.521507	0.0111058	0.114167	1	-0.40734	0.379513	TE	TE	-0.424613	0.0274813	-0.0473698	0.855693	-0.434479	0.0443387	-0.346438	0.385612	translation
ENSMUSG00000021764	Ndufs4	-0.685057	0.0111659	-0.590009	0.153965	-1.27507	8.36028e-11	TE	TE	-1.3188	9.40785e-05	-0.803495	0.0189111	-1.49255	0.000945124	-1.4695	0.0930171	translation
ENSMUSG00000027312	Atrn	0.562627	0.0111659	0.0490996	1	0.611727	0.0343409	TE	TE	0.568669	0.0105764	0.0673636	0.642539	0.540798	0.0305602	-0.03114	0.901149	translation
ENSMUSG00000025410	Dctn2	-0.434123	0.0111812	0.203663	1	-0.23046	1	TE	TE	-0.239079	0.190142	0.0830559	0.663862	-0.229366	0.272314	0.0301665	0.917106	background
ENSMUSG00000043131	Mob1a	0.851105	0.0112802	0.547884	0.282691	1.39899	5.34553e-07	TE	TE	1.36525	8.5035e-05	0.375165	0.119852	1.15396	0.001557	-0.483367	0.366806	translation
ENSMUSG00000022682	Rrn3	0.590192	0.0118189	0.11148	1	0.701672	0.00306006	TE	TE	0.689492	0.00307284	0.0389162	0.813948	0.697943	0.00947538	0.131493	0.659805	translation
ENSMUSG00000022801	Lrch3	0.590631	0.0118189	-0.0194302	1	0.571201	0.096453	TE	TE	0.601194	0.0084258	-0.0195828	0.899336	0.600914	0.021962	-0.0162122	0.951127	translation
ENSMUSG00000035614	Togaram1	1.15742	0.0118189	-0.0941839	1	1.06324	0.0186932	TE	TE	0.659042	0.28063	-0.0921345	0.543876	0.806495	0.256282	-0.123977	0.489748	background
ENSMUSG00000026817	Ak1	-0.880729	0.0119403	-0.493806	0.721068	-1.37453	9.46795e-09	TE	TE	-1.44861	0.000143647	-0.609877	0.0428844	-1.49461	0.00263853	-0.739723	0.31551	translation
ENSMUSG00000043535	Setx	0.926281	0.012137	-0.182385	1	0.743896	0.071794	TE	TE	0.658842	0.0814791	-0.220452	0.0968555	0.70502	0.203372	-0.228519	0.180613	background
ENSMUSG00000024998	Plce1	0.874339	0.0121929	0.182334	1	1.05667	0.000868509	TE	TE	1.04569	0.00233365	0.0588376	0.801891	1.01985	0.00864814	-0.164286	0.680738	translation
ENSMUSG00000026490	Cdc42bpa	0.953717	0.0121929	-0.130799	1	0.822919	0.0407739	TE	TE	0.743238	0.0382853	-0.378574	0.356162	0.924094	0.0213027	-0.846804	0.0956467	translation
ENSMUSG00000028773	Fabp3	-1.2717	0.0124701	-0.0170744	1	-1.28877	0.000557317	TE	TE	-1.39026	0.00514685	-0.10464	0.63144	-1.4521	0.0129976	-0.237686	0.474363	translation
ENSMUSG00000027074	Slc43a3	0.97599	0.0124757	-0.41085	1	0.56514	0.381541	TE	TE	0.489386	0.0928297	-0.44009	0.0589496	0.652984	0.0933778	-0.550125	0.0782855	background
ENSMUSG00000038467	Chmp4b	-0.696469	0.0126937	0.125686	1	-0.570783	0.103887	TE	TE	-0.60582	0.00912253	-0.271622	0.661379	-0.601961	0.0247847	-0.165013	0.898867	translation
ENSMUSG00000017221	Psmd3	-0.496978	0.0127688	0.0625176	1	-0.43446	0.215198	TE	TE	-0.46259	0.0227053	-0.0241948	0.887081	-0.459056	0.0473293	0.0283141	0.920571	translation
ENSMUSG00000020576	Nbas	0.873676	0.0127688	-0.156165	1	0.717511	0.0728352	TE	TE	0.788239	0.0105449	-0.198205	0.297331	1.01211	0.00381116	-0.534652	0.0340086	translation
ENSMUSG00000030706	Mrpl48	-0.733604	0.0127688	-0.168682	1	-0.902286	0.000776421	TE	TE	-0.890769	0.00238034	-0.11945	0.56108	-0.846768	0.0107134	0.0839584	0.835058	translation
ENSMUSG00000040033	Stat2	0.965285	0.0127688	0.272562	1	1.23785	0.000335793	TE	TE	1.18704	0.000496246	0.248558	0.200715	1.26667	0.00278442	0.432781	0.280973	translation
ENSMUSG00000029465	Arpc3	-0.703422	0.0129224	0.249606	1	-0.453816	0.325227	TE	TE	-0.45418	0.0275209	0.147742	0.512291	-0.485248	0.0404886	0.334633	0.345581	translation
ENSMUSG00000016252	Atp5e	-0.984485	0.0129911	-0.451233	1	-1.43572	1.20516e-07	TE	TE	-1.485	0.000771205	-0.503757	0.00443991	-1.51747	0.035029	-0.515291	0.0752919	translation
ENSMUSG00000018585	Atox1	-0.909566	0.0129911	0.541394	0.762242	-0.368172	0.794417	TE	TE	-0.40612	0.100434	0.313656	0.362681	-0.484036	0.0893982	0.55125	0.213286	background
ENSMUSG00000060657	Marf1	0.950627	0.013044	-0.0868654	1	0.863762	0.0739484	TE	TE	0.659586	0.0578655	-0.240499	0.330753	0.717501	0.0896367	-0.312018	0.357435	background
ENSMUSG00000053641	Dennd4a	1.59228	0.0130842	0.0562112	1	1.64849	0.00398124	TE	TE	1.58392	0.00322713	0.195817	0.598302	1.61868	0.0109928	0.336449	0.604671	translation
ENSMUSG00000047084	Ngrn	-0.63915	0.0131352	0.0212799	1	-0.61787	0.0479454	TE	TE	-0.608342	0.0151871	0.0395068	0.808587	-0.622668	0.0300293	0.112731	0.633266	translation
ENSMUSG00000007617	Homer1	-0.830227	0.0133434	-0.304838	1	-1.13506	3.31369e-05	TE	TE	-1.18919	0.000566895	-0.44232	0.0657654	-1.15691	0.00793526	-0.376194	0.465325	translation
ENSMUSG00000018800	Abca5	1.11007	0.0134332	-0.163307	1	0.946765	0.0519471	TE	TE	0.844589	0.00315142	-0.148186	0.586386	0.858725	0.0105763	-0.249698	0.631917	translation
ENSMUSG00000054509	Parp4	0.959323	0.0136828	-0.608009	0.379195	0.351314	1	TE	TE	0.394359	0.166773	-0.794142	0.0492879	0.642807	0.074814	-1.05803	0.0377365	buffering
ENSMUSG00000002949	Timm44	-0.54214	0.013792	-0.316087	1	-0.858228	3.38197e-06	TE	TE	-0.856131	0.00075116	-0.353845	0.0120131	-0.56835	0.0650626	-0.119872	0.622925	abundance
ENSMUSG00000005575	Ube2m	-0.646758	0.013792	-0.0559363	1	-0.702695	0.00638607	TE	TE	-0.722788	0.00304451	-0.210175	0.375969	-0.735607	0.0108193	-0.285548	0.560711	translation
ENSMUSG00000042105	Inpp5f	1.34907	0.013851	0.383228	1	1.7323	0.000195847	TE	TE	1.75337	0.000359875	0.270671	0.179036	1.77655	0.00386448	0.303386	0.466117	translation
ENSMUSG00000027365	Trpm7	1.11638	0.0141165	-0.245122	1	0.871258	0.0749747	TE	TE	0.745472	0.0697023	-0.325124	0.112629	0.598975	0.268022	-0.260388	0.342478	background
ENSMUSG00000042286	Stab1	1.35164	0.0141406	0.833188	0.227245	2.18483	4.60703e-10	TE	TE	2.00748	0.000129048	0.647168	0.0775053	1.72173	0.00377307	-0.110728	0.904794	translation
ENSMUSG00000030451	Herc2	1.14591	0.0141782	-0.0965961	1	1.04931	0.00674489	TE	TE	1.24083	0.00892106	-0.198421	0.391696	1.4845	0.00608104	-0.527554	0.0872723	translation
ENSMUSG00000004394	Tmed4	-0.663157	0.0143487	0.137429	1	-0.525728	0.296364	TE	TE	-0.574232	0.0263393	0.113377	0.500382	-0.703177	0.0113306	0.357615	0.0707611	translation
ENSMUSG00000031311	Nono	-0.725693	0.0143554	0.127879	1	-0.597814	0.114822	TE	TE	-0.633272	0.0502007	0.0664553	0.653899	-0.572702	0.115665	0.000210976	0.999581	background
ENSMUSG00000002102	Psmc3	-0.449757	0.0143692	-0.0300788	1	-0.479836	0.0784396	TE	TE	-0.496481	0.0125828	-0.108552	0.479243	-0.499847	0.0300293	-0.122876	0.660686	translation
ENSMUSG00000018102	Hist1h2bc	-1.05154	0.0146695	0.305682	1	-0.74586	0.106601	TE	TE	-0.883078	0.0181267	0.342793	0.250848	-1.16109	0.00608104	0.812138	0.0352322	translation
ENSMUSG00000022263	Trio	0.919317	0.0146695	0.153381	1	1.0727	0.000364307	TE	TE	1.16939	0.00377831	0.126544	0.447252	1.18124	0.0147663	0.141742	0.60904	translation
ENSMUSG00000029505	Ep400	0.726168	0.0146695	0.0417976	1	0.767966	0.011389	TE	TE	0.789498	0.0143868	-0.0540808	0.760808	0.80536	0.0310233	-0.105291	0.689738	translation
ENSMUSG00000049401	Ogfr	-0.502827	0.0153882	-0.0689334	1	-0.57176	0.0240252	TE	TE	-0.581489	0.00791837	-0.204186	0.305784	-0.619389	0.016966	-0.361117	0.321315	translation
ENSMUSG00000019998	Stx7	-0.641072	0.0154604	0.104274	1	-0.536798	0.110897	TE	TE	-0.617319	0.0192358	-0.163248	0.693009	-0.589491	0.0461424	0.155597	0.821306	translation
ENSMUSG00000021408	Ripk1	0.99235	0.0154604	0.115371	1	1.10772	0.00979751	TE	TE	1.05169	0.00213892	-0.0179844	0.951609	1.06449	0.00377307	-0.525623	0.165294	translation
ENSMUSG00000022420	Dnal4	-0.999167	0.0154604	0.241911	1	-0.757256	0.12948	TE	TE	-0.723862	0.0175722	0.159047	0.417863	-0.784619	0.0303108	0.266953	0.355641	translation
ENSMUSG00000027276	Jag1	0.984246	0.0154604	0.229857	1	1.2141	0.000207434	TE	TE	1.10183	0.00329929	0.148053	0.550356	0.971238	0.00998108	-0.314222	0.359592	translation
ENSMUSG00000028830	AU040320	-0.57038	0.0154627	0.161277	1	-0.409103	0.457023	TE	TE	-0.417895	0.06539	0.172472	0.2082	-0.412126	0.147622	0.168384	0.373125	background
ENSMUSG00000046909	Tefm	-0.657246	0.0155307	-0.177359	1	-0.834605	0.000656341	TE	TE	-0.848864	0.00311087	-0.188619	0.178815	-0.628195	0.0375112	0.0309381	0.897486	translation
ENSMUSG00000066900	Suds3	-0.593785	0.0155612	-0.230892	1	-0.824677	0.00044662	TE	TE	-0.853361	0.00222155	-0.248466	0.0692543	-0.567487	0.0655478	-0.0307358	0.897298	background
ENSMUSG00000039062	Anpep	0.986937	0.0158773	0.680154	0.12713	1.66709	6.85811e-08	TE	TE	1.54962	2.02665e-05	0.57047	0.0558674	1.58332	0.000623072	0.774602	0.445837	translation
ENSMUSG00000024589	Nedd4l	0.637468	0.0159983	-0.099231	1	0.538237	0.192776	TE	TE	0.536436	0.0182646	-0.228273	0.28691	0.648753	0.0139195	-0.566126	0.0700045	translation
ENSMUSG00000037965	Zc3h7a	0.673369	0.0159983	0.0884703	1	0.761839	0.0196672	TE	TE	0.698555	0.0178049	0.0723153	0.598916	0.761826	0.0274591	0.147573	0.418674	translation
ENSMUSG00000027962	Vcam1	0.942697	0.0169293	0.545227	0.66317	1.48792	2.41165e-07	TE	TE	1.43187	0.000161652	0.257661	0.567827	1.33965	0.000849501	-1.13271	0.200573	translation
ENSMUSG00000053907	Mat2a	0.588855	0.0170064	-0.607143	0.0475198	-0.0182877	1	Unchanged		-0.0465421	0.827161	-0.61261	0.00396678	0.209178	0.430508	-0.582552	0.0161978	buffering
ENSMUSG00000071528	Usmg5	-1.24046	0.0171572	-0.892051	0.15589	-2.13251	1.95063e-11	TE	TE	-2.21817	0.000158977	-0.842307	0.00872296	-2.64387	0.00263853	-1.28286	0.0540201	translation
ENSMUSG00000010057	Nprl2	-0.709073	0.0173247	-0.183498	1	-0.892571	0.000671465	TE	TE	-0.869751	0.00064274	-0.0871324	0.754574	-0.854251	0.00339545	0.31609	0.631917	translation
ENSMUSG00000024620	Pdgfrb	0.701254	0.0173247	0.713428	0.0192408	1.41468	3.32583e-12	RNA+Ribo	concordant (intensified)	1.40271	4.5076e-05	0.398012	0.432119	1.3536	0.000623072	-0.791498	0.622925	translation
ENSMUSG00000026640	Plxna2	0.751411	0.0173247	-0.633498	0.120494	0.117913	1	TE	TE	0.0624511	0.850733	-0.674373	0.000964378	0.418184	0.508709	-0.681815	0.00800081	buffering
ENSMUSG00000052738	Suclg1	-0.770655	0.0173247	-0.571409	0.302293	-1.34206	9.14938e-10	TE	TE	-1.30508	0.000327366	-0.632727	0.00139411	-0.816463	0.122636	-0.373994	0.225457	abundance
ENSMUSG00000037416	Dmxl1	0.986694	0.0173597	-0.336935	1	0.649759	0.23019	TE	TE	0.506302	0.207052	-0.504621	0.0945647	0.828651	0.0932598	-0.665824	0.0658326	background
ENSMUSG00000021488	Nsd1	0.71257	0.01749	0.0085138	1	0.721084	0.0327184	TE	TE	0.607794	0.0580027	-0.0835131	0.619145	0.658806	0.0760757	-0.150916	0.485812	background
ENSMUSG00000036275	9530068E07Rik	-0.573434	0.0180189	0.205375	1	-0.36806	0.851356	TE	TE	-0.372878	0.0660986	0.0401475	0.885318	-0.379843	0.0974973	0.204743	0.596449	background
ENSMUSG00000028455	Stoml2	-0.489947	0.0180852	-0.0465422	1	-0.536489	0.0622634	TE	TE	-0.542229	0.00884316	-0.0865182	0.51788	-0.460753	0.0313102	0.156635	0.393631	translation
ENSMUSG00000024955	Esrra	-0.622393	0.0182346	-0.133822	1	-0.756215	0.00243973	TE	TE	-0.803559	0.0026208	-0.265244	0.219948	-0.963126	0.00263853	-0.762194	0.0381271	translation
ENSMUSG00000009647	Mcu	-0.72401	0.0190369	-0.0950874	1	-0.819098	0.00437363	TE	TE	-0.829318	0.000459228	-0.227043	0.227415	-0.890953	0.00192509	-0.639641	0.181085	translation
ENSMUSG00000000826	Dnajc5	-0.660495	0.0192749	-0.0860736	1	-0.746568	0.00708814	TE	TE	-0.783182	0.00603795	-0.171042	0.278283	-0.511579	0.0292746	0.194822	0.231729	translation
ENSMUSG00000034453	Polr3b	0.743231	0.0193296	0.311663	1	1.05489	0.000528103	TE	TE	1.03259	0.000580742	0.341507	0.0566617	1.06733	0.00629419	0.398104	0.287452	translation
ENSMUSG00000035212	Leprot	0.93554	0.0193296	0.551653	0.379195	1.48719	2.30866e-06	TE	TE	1.43785	3.88077e-05	0.497365	0.00558856	1.51472	0.00215259	0.603156	0.177717	translation
ENSMUSG00000035726	Supt16	0.672675	0.0193296	-0.0377014	1	0.634973	0.073637	TE	TE	0.581335	0.0273365	-0.190586	0.458176	0.568853	0.0657252	-0.149133	0.723517	background
ENSMUSG00000038412	Higd1a	1.53493	0.0193296	-0.904266	0.264349	0.630667	0.546272	TE	TE	0.48834	0.275689	-1.02248	0.00242853	0.571374	0.504436	-1.03635	0.0167921	buffering
ENSMUSG00000060475	Wtap	-0.708112	0.0196254	0.242437	1	-0.465676	0.549355	TE	TE	-0.529469	0.0641153	0.267015	0.081434	-0.303411	0.421384	0.174619	0.375614	background
ENSMUSG00000015243	Abca1	0.687357	0.0200372	-0.337579	1	0.349778	1	TE	TE	0.340169	0.148605	-0.412933	0.04946	0.494602	0.107254	-0.522734	0.0575418	background
ENSMUSG00000038370	Pcp4l1	-0.700586	0.0209921	-0.924109	0.000300164	-1.62469	3.87425e-17	RNA+Ribo	concordant (intensified)	-1.63105	5.30435e-06	-1.14048	0.00294289	-1.55719	0.000623072	-0.640647	0.6866	translation
ENSMUSG00000039585	Myo9a	1.07434	0.0209921	0.254174	1	1.32851	0.000950991	TE	TE	1.13595	0.01826	0.0845888	0.781485	1.12687	0.044319	0.0459829	0.925914	translation
ENSMUSG00000038095	Sbno1	0.536231	0.0210663	-0.213733	1	0.322497	0.873333	TE	TE	0.263979	0.269434	-0.232443	0.0690648	0.119923	0.748292	-0.204629	0.186822	background
ENSMUSG00000019054	Fis1	-0.620075	0.0213835	-0.0483385	1	-0.668413	0.0133895	TE	TE	-0.692212	0.00545496	-0.356955	0.43836	-0.738218	0.0116004	-0.885716	0.286403	translation
ENSMUSG00000005501	Usp40	0.732992	0.0214641	-0.194785	1	0.538207	0.36672	TE	TE	0.451038	0.211122	-0.270379	0.055938	0.321687	0.573096	-0.253007	0.145712	background
ENSMUSG00000040242	Fgfr1op2	-0.731328	0.0217065	0.0258869	1	-0.705441	0.108083	TE	TE	-0.816205	0.0174503	-0.00979356	0.95484	-0.831717	0.0218509	-0.157681	0.395338	translation
ENSMUSG00000033400	Agl	0.41851	0.0217803	-0.536486	0.0273338	-0.117977	1	Unchanged		-0.131806	0.47787	-0.60664	0.00131805	-0.257423	0.378791	-0.638918	0.00997337	buffering
ENSMUSG00000026131	Dst	1.16846	0.0220017	-0.338406	1	0.830056	0.129077	TE	TE	0.888863	0.0430118	-0.426488	0.0306356	1.43364	0.0230938	-0.586479	0.0282923	translation
ENSMUSG00000030660	Pik3c2a	1.01111	0.0220851	-0.114488	1	0.896624	0.0421152	TE	TE	0.714806	0.15937	-0.158849	0.363414	0.562322	0.366378	-0.10863	0.630141	background
ENSMUSG00000018417	Myo1b	1.09893	0.0221747	0.148062	1	1.24699	0.000905649	TE	TE	1.21256	0.0107989	-0.171772	0.744642	1.28273	0.014844	-0.740024	0.300426	translation
ENSMUSG00000024944	Arl2	-0.636419	0.0223208	0.150865	1	-0.485554	0.340789	TE	TE	-0.521244	0.0289563	0.179027	0.266091	-0.493834	0.0855728	0.14258	0.562667	background
ENSMUSG00000055296	Tmem245	0.546823	0.0223208	-0.114547	1	0.432276	0.306503	TE	TE	0.400829	0.0449945	-0.169462	0.304443	0.401204	0.0904532	-0.170307	0.508742	background
ENSMUSG00000102252	Snrpn	-1.45318	0.0223208	-0.200057	1	-1.65324	0.00119808	TE	TE	-1.45056	0.00788001	-0.076998	0.809285	-1.37349	0.0144686	0.336207	0.408215	translation
ENSMUSG00000030835	Nomo1	0.497926	0.0223812	0.00457251	1	0.502499	0.127636	TE	TE	0.475027	0.0278999	-0.0495256	0.70689	0.472984	0.0584392	-0.0446173	0.823426	background
ENSMUSG00000030766	Arhgap17	0.817167	0.022697	0.0451158	1	0.862283	0.0120942	TE	TE	0.78639	0.00314255	-0.113425	0.667892	0.749981	0.0110572	0.250736	0.596684	translation
ENSMUSG00000051786	Tubgcp6	0.949332	0.0227453	0.0817064	1	1.03104	0.0263577	TE	TE	1.06467	0.0140999	0.0278436	0.871526	1.12295	0.0117159	0.217112	0.251883	translation
ENSMUSG00000043943	Naalad2	1.40707	0.0227577	0.674282	0.699724	2.08135	5.50245e-07	TE	TE	1.82682	0.00177258	0.517636	0.0687307	1.12496	0.0344371	-0.146234	0.719227	translation
ENSMUSG00000024191	Bnip1	-0.672969	0.0231121	-0.129872	1	-0.802842	0.00482475	TE	TE	-0.942712	0.0357224	-0.103708	0.566746	-0.83097	0.0964503	0.00432282	0.986207	background
ENSMUSG00000022571	Pycrl	-0.87549	0.0231614	0.2492	1	-0.626289	0.309143	TE	TE	-0.668775	0.0155038	0.205986	0.285459	-0.818727	0.0119292	0.456835	0.0888196	translation
ENSMUSG00000049624	Slc17a5	0.959633	0.0231614	-0.21755	1	0.742083	0.292508	TE	TE	0.654837	0.0515844	-0.256879	0.0469716	0.422385	0.426402	-0.21716	0.18592	background
ENSMUSG00000074457	S100a16	-0.85453	0.0231614	0.582346	0.389626	-0.272184	1	TE	TE	-0.348288	0.191714	0.378324	0.194751	-0.553886	0.0558608	0.630687	0.0517094	background
ENSMUSG00000091337	Eid1	-0.726205	0.0232604	0.54476	0.551086	-0.181446	1	TE	TE	-0.194299	0.33968	0.525184	0.0375633	-0.123273	0.657295	0.460488	0.141719	background
ENSMUSG00000004677	Myo9b	1.03841	0.0232708	0.588619	0.678665	1.62703	6.48265e-07	TE	TE	1.65902	0.00104019	0.464744	0.0471951	1.56301	0.016966	0.379745	0.384306	translation
ENSMUSG00000022200	Golph3	-0.643052	0.0232708	-0.157873	1	-0.800925	0.00106788	TE	TE	-0.775673	0.00375749	-0.323228	0.182128	-0.776972	0.0164557	-0.327191	0.483352	translation
ENSMUSG00000004610	Etfb	-0.933242	0.0233272	-0.669409	0.313641	-1.60265	1.59561e-08	TE	TE	-1.743	0.000121761	-0.731706	0.00156964	-1.03488	0.0742473	-0.277159	0.470666	abundance
ENSMUSG00000038845	Phb	-1.37163	0.023343	-0.228475	1	-1.6001	9.65583e-05	TE	TE	-1.60223	0.00139958	-0.180934	0.621892	-1.58544	0.00710876	-0.0873152	0.909255	translation
ENSMUSG00000027245	Hypk	-0.673619	0.0237667	-0.0388229	1	-0.712442	0.0112797	TE	TE	-0.725694	0.00352934	-0.0722833	0.69841	-0.681934	0.0110572	0.247161	0.395449	translation
ENSMUSG00000024085	Man2a1	1.06427	0.0237954	-0.305439	1	0.758829	0.136225	TE	TE	0.68037	0.0539529	-0.330295	0.267497	0.952214	0.0124592	-0.712061	0.0381271	translation
ENSMUSG00000041936	Agrn	1.13226	0.0237954	0.591808	0.621909	1.72406	2.21496e-07	TE	TE	1.58334	0.000350731	0.454902	0.128135	1.14415	0.00260687	-0.643893	0.101995	translation
ENSMUSG00000025280	Polr3a	0.631202	0.0239633	-0.159046	1	0.472156	0.416377	TE	TE	0.489805	0.0395474	-0.249728	0.172682	0.610161	0.0353674	-0.407214	0.115063	translation
ENSMUSG00000034593	Myo5a	1.46091	0.0239633	0.687077	0.536338	2.14799	1.71553e-05	TE	TE	1.99469	0.000608364	0.552523	0.0557765	1.46097	0.0175977	-0.0516268	0.927036	translation
ENSMUSG00000050627	Gpd1l	-0.583376	0.0239633	-0.198802	1	-0.782177	0.000475777	TE	TE	-0.794552	0.00195944	-0.315224	0.0958288	-0.833448	0.0098662	-0.402267	0.286773	translation
ENSMUSG00000075254	Heg1	0.701574	0.0239633	-0.288261	1	0.413312	0.739089	TE	TE	0.365507	0.14418	-0.365736	0.0411789	0.68843	0.0316546	-0.510834	0.0242333	translation
ENSMUSG00000039167	Adgrl4	0.885649	0.0241973	-0.339533	1	0.546115	0.275577	TE	TE	0.488584	0.137704	-0.53287	0.127721	0.698851	0.0811028	-0.749187	0.0860436	background
ENSMUSG00000043140	Tmem186	-0.781653	0.0242812	-0.0892101	1	-0.870863	0.00516244	TE	TE	-0.936308	0.0036928	-0.181708	0.297331	-0.771637	0.0248541	0.0718296	0.808347	translation
ENSMUSG00000021275	Tecpr2	0.784734	0.0242883	0.022856	1	0.80759	0.0976159	TE	TE	0.755077	0.0139891	0.00330909	0.982459	0.754207	0.0327609	-0.0119767	0.951625	translation
ENSMUSG00000004937	Sgta	-0.634329	0.0243034	-0.112031	1	-0.74636	0.00332418	TE	TE	-0.772694	0.00334261	-0.121047	0.389756	-0.783692	0.0130238	-0.140312	0.561127	translation
ENSMUSG00000014353	Tmem87b	0.721936	0.024385	-0.209271	1	0.512665	0.398875	TE	TE	0.468186	0.0408051	-0.239135	0.163591	0.286175	0.245162	-0.012856	0.95867	background
ENSMUSG00000024181	Mrpl28	-0.658163	0.024385	-0.490756	0.522222	-1.14892	7.45672e-08	TE	TE	-1.19909	0.000182323	-0.474661	0.0185011	-1.05155	0.00874874	-0.229304	0.623424	translation
ENSMUSG00000028957	Per3	1.58577	0.024385	-0.219138	1	1.36663	0.0406418	TE	TE	1.18254	0.00688734	-0.351845	0.408986	1.38387	0.00495946	-1.05755	0.0738144	translation
ENSMUSG00000040859	Bsdc1	-0.68649	0.024385	-0.169448	1	-0.855939	0.00161307	TE	TE	-0.825122	0.00390194	-0.178589	0.297331	-0.578109	0.0149685	0.273439	0.124086	translation
ENSMUSG00000032294	Pkm	-0.581527	0.0245322	-0.129276	1	-0.710803	0.00216502	TE	TE	-0.731583	0.00218469	-0.22949	0.272558	-0.678976	0.0126478	0.0206772	0.966817	translation
ENSMUSG00000037487	Ubr5	0.724647	0.0249365	-0.0280735	1	0.696574	0.0515999	TE	TE	0.675679	0.0210797	-0.154656	0.542811	0.731586	0.0305147	-0.344956	0.343728	translation
ENSMUSG00000044749	Abca6	1.28985	0.0249365	-0.124599	1	1.16525	0.0281112	TE	TE	1.23011	0.0140108	-0.201258	0.484717	1.41339	0.0124369	-0.531502	0.161762	translation
ENSMUSG00000019966	Kitl	1.11678	0.0253381	-0.0316923	1	1.08509	0.0117334	TE	TE	0.87119	0.06539	-0.112991	0.558286	0.981054	0.0717529	-0.205872	0.396306	background
ENSMUSG00000020850	Prpf8	0.712049	0.0253381	-0.175355	1	0.536695	0.250108	TE	TE	0.595227	0.0289263	-0.218551	0.175708	0.835876	0.0110572	-0.419367	0.0466461	translation
ENSMUSG00000015656	Hspa8	-1.64518	0.0253624	-0.131962	1	-1.77714	0.000480317	TE	TE	-1.8035	0.0211165	-0.200775	0.163466	-2.00133	0.05877	-0.23331	0.236015	background
ENSMUSG00000024483	Ankhd1	0.502375	0.0253624	-0.317868	1	0.184507	1	TE	TE	0.201496	0.284534	-0.418686	0.0287447	0.335053	0.15075	-0.529599	0.0338048	buffering
ENSMUSG00000032410	Xrn1	0.940775	0.0259624	-0.265637	1	0.675139	0.198199	TE	TE	0.582861	0.177038	-0.246009	0.246363	0.255439	0.598071	-0.103455	0.675572	background
ENSMUSG00000002728	Naa20	-0.905742	0.0261185	-0.338125	1	-1.24387	0.000319495	TE	TE	-1.16309	0.00337861	-0.416178	0.0232313	-1.03403	0.0626167	-0.349986	0.22593	abundance
ENSMUSG00000045576	St7l	0.695383	0.0261334	-0.135133	1	0.56025	0.265567	TE	TE	0.555636	0.0279092	-0.149537	0.346973	0.662197	0.0271942	-0.289694	0.177876	translation
ENSMUSG00000052456	Asna1	-0.556479	0.0261334	-0.00357663	1	-0.560055	0.0557854	TE	TE	-0.576844	0.00754636	-0.292331	0.499277	-0.583329	0.0197558	-0.404877	0.655993	translation
ENSMUSG00000024218	Taf11	-0.72528	0.0262759	-0.0879722	1	-0.813252	0.00663298	TE	TE	-0.874257	0.00338153	-0.168273	0.346973	-0.963289	0.00773998	-0.355238	0.226538	translation
ENSMUSG00000030201	Lrp6	0.70896	0.0262759	-0.0439746	1	0.664985	0.0883368	TE	TE	0.606845	0.0307311	-0.0685617	0.610642	0.527916	0.0880344	0.0152794	0.938113	background
ENSMUSG00000031659	Adcy7	1.67282	0.0263089	1.70411	0.000260757	3.37694	1.58047e-11	RNA+Ribo	concordant (intensified)	3.06443	1.56045e-05	1.32236	0.0385145	2.62381	0.000849501	-0.639395	0.726202	translation
ENSMUSG00000053754	Chd8	0.72967	0.027	-0.0639343	1	0.665735	0.0522453	TE	TE	0.663669	0.0273876	-0.241342	0.400778	0.701218	0.0510834	-0.342447	0.424952	background
ENSMUSG00000045930	Clec14a	1.09247	0.027027	0.206541	1	1.29901	0.000848843	TE	TE	1.21659	0.00146326	0.00211809	0.996621	1.21679	0.00625216	0.185342	0.831494	translation
ENSMUSG00000025371	Chmp6	-0.708242	0.0271184	0.403685	1	-0.304557	1	TE	TE	-0.334161	0.240165	0.428586	0.00909414	-0.572403	0.229783	0.464893	0.0269345	buffering
ENSMUSG00000019820	Utrn	0.836333	0.0273643	-0.0798049	1	0.756528	0.0596866	TE	TE	0.75484	0.0279023	-0.163411	0.338981	0.839423	0.0454957	-0.23589	0.319564	translation
ENSMUSG00000027287	Snap23	-0.830076	0.0273643	-0.130805	1	-0.960881	0.00250915	TE	TE	-1.0593	0.00601034	-0.213936	0.242597	-0.945554	0.0371489	-0.0980355	0.756606	translation
ENSMUSG00000096210	H1f0	-0.736712	0.0275823	0.211955	1	-0.524758	0.433701	TE	TE	-0.552572	0.0216576	0.113888	0.589975	-0.542394	0.0519023	0.0697133	0.848804	background
ENSMUSG00000002010	Idh3g	-0.471703	0.0279238	-0.468718	0.305976	-0.94042	1.59561e-08	TE	TE	-0.967608	0.000190335	-0.586329	0.00882136	-1.12705	0.001557	-1.06663	0.0623192	translation
ENSMUSG00000020716	Nf1	1.05745	0.02808	0.0963417	1	1.1538	0.00395726	TE	TE	1.13249	0.0168831	0.0698933	0.683469	1.0443	0.0454957	-0.0450765	0.859694	translation
ENSMUSG00000024346	Pfdn1	-0.963237	0.02808	0.074133	1	-0.889104	0.0159844	TE	TE	-0.957535	0.0161513	-0.215584	0.636152	-0.85029	0.0335485	0.394836	0.49175	translation
ENSMUSG00000043336	Filip1l	0.938549	0.02808	-0.483845	0.921684	0.454704	0.780179	TE	TE	0.279653	0.456802	-0.559243	0.00510531	1.00039	0.0878546	-0.618765	0.0125968	buffering
ENSMUSG00000048047	Zbtb33	1.05765	0.0284679	-0.100705	1	0.956945	0.0493405	TE	TE	0.818676	0.125512	-0.226502	0.288081	1.09715	0.0804225	-0.341518	0.181881	background
ENSMUSG00000001687	Ubl3	-0.588289	0.0286976	-0.236771	1	-0.82506	0.000877272	TE	TE	-0.894072	0.00171624	-0.298414	0.046629	-0.968904	0.0124903	-0.365004	0.167555	translation
ENSMUSG00000019979	Apaf1	1.22778	0.0286976	0.410007	1	1.63779	0.00148005	TE	TE	1.51774	0.0260068	0.369056	0.0467614	1.18223	0.220811	0.30055	0.233115	abundance
ENSMUSG00000052533	Nup188	0.763308	0.0286976	0.234497	1	0.997806	0.000933955	TE	TE	1.06937	0.00299559	0.171545	0.239491	0.893242	0.0287315	0.0254907	0.921592	translation
ENSMUSG00000028073	Pear1	0.918364	0.028822	0.277826	1	1.19619	0.000545278	TE	TE	1.16363	0.000484502	0.32883	0.246024	1.08266	0.00485981	-0.0401497	0.95484	translation
ENSMUSG00000032497	Lrrfip2	-0.512114	0.028822	-0.243719	1	-0.755833	0.000518342	TE	TE	-0.777682	0.00177813	-0.258181	0.116951	-0.568061	0.0221695	0.181638	0.482692	translation
ENSMUSG00000021686	Ap3b1	0.585679	0.029245	0.0370905	1	0.622769	0.0676764	TE	TE	0.595727	0.0100691	-0.135231	0.630079	0.651655	0.0104135	-0.699322	0.0785839	translation
ENSMUSG00000045639	Zfp629	-0.68579	0.029245	-0.243806	1	-0.929596	0.000501926	TE	TE	-0.927642	0.00177561	-0.483872	0.188219	-1.06963	0.00311008	-1.20722	0.0786574	translation
ENSMUSG00000029101	Rgs12	0.889196	0.0295043	0.481349	0.740513	1.37054	2.70791e-05	TE	TE	1.30954	6.05562e-05	0.154058	0.774373	1.28931	0.000623072	-1.10177	0.455943	translation
ENSMUSG00000040549	Ckap5	0.598032	0.0295043	-0.0757977	1	0.522235	0.229469	TE	TE	0.504225	0.06089	-0.125766	0.425318	0.47098	0.140904	-0.0910452	0.684606	background
ENSMUSG00000033020	Polr2f	-0.646208	0.029885	-0.124789	1	-0.770997	0.00327461	TE	TE	-0.800432	0.00094518	-0.0206821	0.953961	-0.798172	0.00405115	0.333632	0.665953	translation
ENSMUSG00000048279	Sacs	1.04317	0.029885	0.0229648	1	1.06613	0.00781169	TE	TE	1.05887	0.0182646	-0.0720386	0.80176	1.13521	0.0139739	-0.431958	0.184784	translation
ENSMUSG00000042644	Itpr3	0.902766	0.0299751	0.0408842	1	0.94365	0.0196705	TE	TE	1.10581	0.0246846	-0.0251633	0.894633	1.15636	0.0219762	-0.206321	0.320825	translation
ENSMUSG00000032359	Ctsh	-0.576338	0.0303645	-0.113845	1	-0.690183	0.00804272	TE	TE	-0.701578	0.00479244	-0.175377	0.271206	-0.580034	0.0305394	0.0657495	0.814445	translation
ENSMUSG00000026674	Ddr2	0.793117	0.0305105	0.275953	1	1.06907	0.000518975	TE	TE	0.997071	0.00258979	0.0156383	0.973635	0.992977	0.00769526	-0.51612	0.459481	translation
ENSMUSG00000035021	Baz1a	1.13575	0.0305105	0.0204966	1	1.15625	0.0179913	TE	TE	0.9812	0.0123252	-0.166968	0.64745	1.12617	0.00264017	-0.89089	0.0240477	translation
ENSMUSG00000056962	Jmjd6	-0.691983	0.0306895	-0.163509	1	-0.855492	0.00242146	TE	TE	-0.84592	0.00328591	-0.411322	0.254318	-0.714529	0.0193851	0.265758	0.677746	translation
ENSMUSG00000068457	Uty	0.889669	0.0306895	-0.5243	0.60308	0.365369	1	TE	TE	0.259103	0.522759	-0.535659	0.00966781	-0.0860184	0.907192	-0.507236	0.0365172	buffering
ENSMUSG00000040785	Ttc3	0.666015	0.0307125	-0.149687	1	0.516328	0.215516	TE	TE	0.517474	0.069368	-0.200677	0.144944	0.779894	0.0314081	-0.298356	0.0838747	translation
ENSMUSG00000078584	AU022252	-0.928521	0.030835	0.319822	1	-0.608699	0.444283	TE	TE	-0.626169	0.0353788	0.267731	0.102674	-0.512373	0.183362	0.203134	0.376372	background
ENSMUSG00000027652	Ralgapb	0.632	0.0312605	-0.05571	1	0.57629	0.169769	TE	TE	0.580747	0.0527226	-0.207707	0.414672	0.630771	0.0759532	-0.306578	0.388055	background
ENSMUSG00000036155	Mgat5	1.12985	0.0320127	0.321757	1	1.45161	0.000845127	TE	TE	1.43649	0.00209979	0.352076	0.126424	1.46063	0.0138965	0.37889	0.358618	translation
ENSMUSG00000002372	Ranbp3	-0.564264	0.0328556	0.207597	1	-0.356667	0.712504	TE	TE	-0.370441	0.0656448	-0.0827532	0.861768	-0.366162	0.109818	0.084923	0.912234	background
ENSMUSG00000022272	Myo10	0.901613	0.0328556	-0.206701	1	0.694912	0.176426	TE	TE	0.800357	0.0368683	-0.474257	0.290719	0.853099	0.0687223	-0.596547	0.358937	background
ENSMUSG00000022678	Nde1	-0.526278	0.0329419	-0.181972	1	-0.70825	0.00461822	TE	TE	-0.733119	0.00360073	-0.238845	0.0586479	-0.457979	0.117541	-0.069373	0.726202	background
ENSMUSG00000027763	Mbnl1	-0.618984	0.0331688	0.0433374	1	-0.575647	0.0972763	TE	TE	-0.609914	0.0268338	-0.0764292	0.73216	-0.570098	0.0576547	0.117718	0.709786	background
ENSMUSG00000032637	Atxn2l	0.633474	0.0331688	-0.1359	1	0.497574	0.337852	TE	TE	0.462696	0.035074	-0.28132	0.271453	0.532294	0.0393522	-0.51813	0.176795	translation
ENSMUSG00000077450	Rab11b	-1.08139	0.0331688	-0.0660994	1	-1.14749	0.00248433	TE	TE	-1.20048	0.00253459	0.0120401	0.969951	-1.19336	0.0066819	-0.371935	0.396929	translation
ENSMUSG00000022575	Gsdmd	1.17576	0.0335558	0.39558	1	1.57135	0.000428797	TE	TE	1.79439	0.00211904	0.308751	0.086819	2.13438	0.00733412	0.477467	0.103649	translation
ENSMUSG00000054693	Adam10	0.90089	0.0337934	0.394856	1	1.29575	5.32394e-05	TE	TE	1.163	0.00621223	0.202115	0.504079	1.01567	0.0209469	-0.237891	0.587741	translation
ENSMUSG00000028899	Taf12	-0.759114	0.0349029	0.0185544	1	-0.74056	0.0726532	TE	TE	-0.829533	0.00723628	-0.098445	0.640134	-0.774748	0.0225395	0.114512	0.73632	translation
ENSMUSG00000038801	Scgb1c1	-1.18614	0.0349029	0.00181249	1	-1.18433	0.00476438	TE	TE	-1.25031	0.00136312	0.00878169	0.985445	-1.256	0.000849501	1.23363	0.0252328	translation
ENSMUSG00000038056	Kmt2c	0.791447	0.035473	-0.149049	1	0.642399	0.127636	TE	TE	0.491477	0.129702	-0.215526	0.180715	0.208362	0.590942	-0.104649	0.591166	background
ENSMUSG00000002900	Lamb1	0.654107	0.0354989	0.62578	0.107238	1.27989	1.57273e-09	TE	TE	1.23612	9.40785e-05	0.462472	0.10358	0.990588	0.00117871	-0.952879	0.0750024	translation
ENSMUSG00000020272	Stk10	0.870605	0.0354989	0.523693	0.588122	1.3943	1.06455e-05	TE	TE	1.37733	0.000441924	0.498024	0.0212713	1.25645	0.014486	0.367798	0.390362	translation
ENSMUSG00000024847	Aip	-0.573772	0.0354989	0.050975	1	-0.522797	0.218464	TE	TE	-0.553761	0.0224767	-0.0157568	0.921746	-0.566573	0.0335485	-0.145297	0.455943	translation
ENSMUSG00000034218	Atm	0.962705	0.0354989	0.0266445	1	0.989349	0.0208206	TE	TE	1.031	0.0157976	-0.299216	0.571036	1.1251	0.0209469	-0.790987	0.283291	translation
ENSMUSG00000034560	Washc4	0.845842	0.0354989	0.380344	1	1.22619	0.000172236	TE	TE	0.988551	0.0193356	0.342915	0.0172064	1.54949	0.0294248	0.432277	0.0297554	translation
ENSMUSG00000035441	Myo1d	1.06511	0.0354989	0.369623	1	1.43473	0.000143849	TE	TE	1.49038	0.00212069	0.253736	0.305525	1.37159	0.0142568	0.0526317	0.914495	translation
ENSMUSG00000026944	Abca2	0.552102	0.0355235	-0.165503	1	0.386598	0.525032	TE	TE	0.335612	0.128371	-0.222127	0.0984212	0.271213	0.366564	-0.194774	0.263129	background
ENSMUSG00000052331	Ankrd44	0.818188	0.0356788	-0.175335	1	0.642853	0.287122	TE	TE	0.454787	0.141585	-0.171552	0.251906	0.483727	0.220898	-0.18313	0.341798	background
ENSMUSG00000021904	Sema3g	0.816404	0.0360893	-0.298983	1	0.517422	0.373168	TE	TE	0.580602	0.0665836	-0.255804	0.260498	0.772833	0.0335827	-0.462906	0.0989943	translation
ENSMUSG00000027580	Helz2	1.02356	0.0364387	-0.111535	1	0.912024	0.0481492	TE	TE	0.99155	0.0194801	-0.184899	0.463538	1.20204	0.00865522	-0.534044	0.078524	translation
ENSMUSG00000030801	Kat8	-0.704469	0.0364387	-0.16974	1	-0.874209	0.00347479	TE	TE	-0.920422	0.00395143	-0.281704	0.198064	-0.818078	0.0282285	-0.0925549	0.825287	translation
ENSMUSG00000060938	Rpl26	-1.34836	0.0364387	0.0900426	1	-1.25832	0.0171494	TE	TE	-1.09471	0.0464623	-0.256154	0.642235	-1.07382	0.0961649	-0.180881	0.829711	background
ENSMUSG00000030335	Mrpl51	-0.705567	0.0365543	-0.182455	1	-0.888022	0.00245164	TE	TE	-0.915982	0.00195986	-0.426694	0.219666	-0.960676	0.00792796	-0.648915	0.352105	translation
ENSMUSG00000031214	Ophn1	1.27205	0.0365543	0.198735	1	1.47079	0.00617474	TE	TE	2.04861	0.00686415	0.00830562	0.982357	2.04965	0.0201797	0.0457543	0.934347	translation
ENSMUSG00000035168	Tanc1	0.770057	0.0365543	-0.0927412	1	0.677316	0.11549	TE	TE	0.784597	0.0227965	-0.320744	0.366046	0.845763	0.0401158	-0.486884	0.355939	translation
ENSMUSG00000030522	Mtmr10	0.941175	0.0366958	-0.538421	0.403829	0.402754	1	TE	TE	0.481509	0.101805	-0.6855	0.0200237	0.72596	0.0823107	-0.843075	0.0337957	buffering
ENSMUSG00000031328	Flna	1.04152	0.0367824	0.454658	1	1.49617	6.34982e-06	TE	TE	1.40544	0.00161141	0.330899	0.255512	1.03457	0.00483748	-0.521078	0.11263	translation
ENSMUSG00000028960	Ube4b	0.695186	0.0370574	0.0587686	1	0.753954	0.0143822	TE	TE	0.753451	0.00771691	-0.119719	0.696077	0.795368	0.0127866	-0.49844	0.280822	translation
ENSMUSG00000062234	Gak	0.764782	0.0370574	-0.0427822	1	0.722	0.070179	TE	TE	0.812474	0.0249308	-0.00838948	0.968511	0.820577	0.0372643	-0.155231	0.521149	translation
ENSMUSG00000000439	Mkrn2	-0.634337	0.0371355	-0.00444468	1	-0.638781	0.0614264	TE	TE	-0.646589	0.0124992	-0.118759	0.538064	-0.634402	0.0344725	-0.0785894	0.817144	translation
ENSMUSG00000004285	Atp6v1f	-0.953637	0.0371355	0.0337837	1	-0.919854	0.014371	TE	TE	-0.969553	0.00757701	-0.00729867	0.974051	-0.963613	0.0152351	0.198856	0.484935	translation
ENSMUSG00000060373	Hnrnpc	-0.884967	0.0371355	-0.327983	1	-1.21295	5.1725e-05	TE	TE	-1.36489	0.00375749	-0.395141	0.0126723	-1.44003	0.0591346	-0.413164	0.0786553	abundance
ENSMUSG00000000759	Tubgcp3	0.6392	0.0377758	-0.00381073	1	0.635389	0.189779	TE	TE	0.674285	0.0234552	-0.070351	0.625067	0.692773	0.0485724	-0.0947434	0.640726	translation
ENSMUSG00000007777	0610009B22Rik	-0.737289	0.0378249	-0.169429	1	-0.906718	0.00225917	TE	TE	-0.9286	0.00377447	-0.0867932	0.751757	-0.91634	0.0133641	0.0220468	0.96702	translation
ENSMUSG00000078578	Ube2d3	-0.613274	0.0378406	0.265523	1	-0.347751	1	TE	TE	-0.341711	0.136083	0.136876	0.524595	-0.292674	0.259969	0.017824	0.954235	background
ENSMUSG00000030298	Sec13	-0.588694	0.0378826	0.218257	1	-0.370437	0.767634	TE	TE	-0.391257	0.0597941	-0.139633	0.809423	-0.373454	0.100115	0.45675	0.557333	background
ENSMUSG00000056201	Cfl1	-0.993125	0.0383615	0.860609	0.121737	-0.132515	1	TE	TE	-0.264548	0.425619	0.55929	0.229428	-0.462855	0.199288	0.754054	0.132243	background
ENSMUSG00000035776	Cd99l2	-0.532758	0.0385106	-0.0228158	1	-0.555574	0.0636631	TE	TE	-0.566884	0.0272614	0.0160498	0.934652	-0.564049	0.0559341	-0.0256849	0.929902	background
ENSMUSG00000023456	Tpi1	-0.539746	0.0386355	-0.129561	1	-0.669307	0.00510914	TE	TE	-0.693036	0.00291006	-0.235581	0.199006	-0.704204	0.0119292	-0.272668	0.468555	translation
ENSMUSG00000026878	Rab14	-0.593121	0.0386355	-0.255046	1	-0.848167	0.000461112	TE	TE	-0.91296	0.00290871	-0.217006	0.207488	-1.15711	0.00168676	-0.582205	0.0285532	translation
ENSMUSG00000038679	Trps1	1.08704	0.0386355	0.437561	0.968047	1.5246	0.00105593	TE	TE	1.31537	0.00472774	0.193816	0.599522	1.10737	0.00270099	-0.721808	0.0371017	translation
ENSMUSG00000057858	Fam204a	-0.743129	0.0388405	-0.0685327	1	-0.811662	0.0377072	TE	TE	-0.731624	0.0149962	0.00450616	0.986056	-0.729849	0.0307623	-0.149244	0.661541	translation
ENSMUSG00000029104	Htt	0.970832	0.0398531	0.11629	1	1.08712	0.00523059	TE	TE	1.0723	0.0182213	-0.0663429	0.846638	1.13288	0.0138965	-0.514192	0.177322	translation
ENSMUSG00000020116	Pno1	-0.654793	0.0399279	0.0150984	1	-0.639694	0.076807	TE	TE	-0.682481	0.00529043	-0.0362105	0.866578	-0.659522	0.0110511	0.362267	0.209229	translation
ENSMUSG00000007815	Rhoa	-0.643783	0.0399412	0.0357266	1	-0.608057	0.0972852	TE	TE	-0.604631	0.0259939	0.0255693	0.884787	-0.588185	0.0515058	-0.0869972	0.715558	background
ENSMUSG00000038773	Kdm3b	0.571895	0.0400245	0.0190369	1	0.590932	0.103968	TE	TE	0.590982	0.0254371	-0.360763	0.540112	0.607047	0.050136	-0.528737	0.573719	background
ENSMUSG00000020483	Dynll2	0.749419	0.0404302	-0.603913	0.29154	0.145506	1	TE	TE	0.099778	0.687236	-0.711483	0.0122131	-0.0467201	0.903056	-0.679518	0.0395862	buffering
ENSMUSG00000038371	Sbf2	0.851067	0.0404302	-0.20234	1	0.648728	0.238636	TE	TE	0.478797	0.198772	-0.294393	0.146183	0.428271	0.388259	-0.275249	0.286859	background
ENSMUSG00000039496	Cdnf	-0.821566	0.0405293	-0.15816	1	-0.979726	0.00306006	TE	TE	-1.06813	0.00352572	-0.179453	0.40613	-1.01669	0.0168825	-0.0643252	0.877538	translation
ENSMUSG00000023066	Rttn	1.4502	0.0405392	-0.165687	1	1.28451	0.0534626	TE	TE	1.08404	0.0363862	-0.08833	0.803134	1.08954	0.0714605	-0.112225	0.831494	background
ENSMUSG00000025223	Ldb1	-0.554318	0.0411799	0.0177364	1	-0.536581	0.165941	TE	TE	-0.537386	0.0341462	-0.0711679	0.679616	-0.524782	0.0730253	-0.0346986	0.898954	background
ENSMUSG00000038722	Bud31	-0.775425	0.0414405	0.132804	1	-0.64262	0.141359	TE	TE	-0.607084	0.0346173	-0.0806013	0.811616	-0.597877	0.0703829	0.0116325	0.982187	background
ENSMUSG00000030435	U2af2	-0.777412	0.0414614	0.18276	1	-0.594652	0.196912	TE	TE	-0.619771	0.00364592	0.330336	0.347044	-0.597949	0.0142568	0.0243855	0.978474	translation
ENSMUSG00000058298	Mcm9	1.17078	0.0415658	0.415568	0.984685	1.58635	0.0025318	TE	TE	1.55839	0.000157617	0.354766	0.0345431	1.47937	0.00659734	0.282553	0.420859	translation
ENSMUSG00000056608	Chd9	0.874124	0.0421978	-0.21441	1	0.659714	0.399804	TE	TE	0.399704	0.466387	-0.259197	0.117891	0.024483	0.976149	-0.225669	0.23841	background
ENSMUSG00000021589	Rhobtb3	0.893829	0.042314	0.330558	1	1.22439	0.000834833	TE	TE	1.11626	0.0015782	0.16132	0.506047	1.00727	0.00705523	-0.290118	0.459972	translation
ENSMUSG00000039263	Npepl1	-0.613465	0.0423313	-0.0326813	1	-0.646146	0.0334035	TE	TE	-0.66175	0.0132537	-0.085401	0.533365	-0.71264	0.0246319	-0.154993	0.420859	translation
ENSMUSG00000030847	Bag3	-0.518987	0.0425827	-0.82465	0.000196528	-1.34364	1.41597e-16	RNA+Ribo	concordant (intensified)	-1.34827	1.56045e-05	-0.925441	0.000892204	-0.983508	0.00358311	0.352734	0.638938	translation
ENSMUSG00000021910	Nisch	0.603919	0.0427102	0.13954	1	0.743459	0.0101042	TE	TE	0.735439	0.00887155	0.0636657	0.683251	0.690348	0.0271615	-0.0606031	0.806859	translation
ENSMUSG00000031902	Nfatc3	0.78185	0.0427102	-0.0316519	1	0.750198	0.165063	TE	TE	0.650655	0.0561471	-0.138928	0.473198	0.634505	0.117702	-0.120098	0.663115	background
ENSMUSG00000021987	Mtmr6	0.433204	0.0428528	0.205539	1	0.638743	0.0110259	TE	TE	0.518741	0.0224379	0.166765	0.135527	0.424625	0.168057	0.134314	0.374405	background
ENSMUSG00000033671	Cep350	0.704984	0.0428729	-0.313204	1	0.39178	0.711062	TE	TE	0.368499	0.185543	-0.418333	0.0347177	0.454405	0.255849	-0.450538	0.0764137	background
ENSMUSG00000040389	Wdr47	0.765021	0.0434277	0.258106	1	1.02313	0.00362137	TE	TE	0.849459	0.0134776	0.261389	0.0965477	0.994981	0.0317918	0.336506	0.142351	translation
ENSMUSG00000022671	Mzt2	-0.784142	0.0436751	0.178197	1	-0.605945	0.182573	TE	TE	-0.640221	0.00479244	0.196751	0.405588	-0.677569	0.0114102	0.444673	0.325131	translation
ENSMUSG00000020537	Drg2	-0.491523	0.0438932	-0.166133	1	-0.657656	0.0118677	TE	TE	-0.791411	0.0175722	-0.1774	0.110821	-1.12756	0.0298077	-0.227581	0.114085	translation
ENSMUSG00000028030	Tbck	0.746788	0.0438932	-0.26642	1	0.480368	0.911488	TE	TE	0.318418	0.537702	-0.340117	0.0200237	0.07213	0.941329	-0.331661	0.0566605	background
ENSMUSG00000029507	Pus1	-0.618498	0.0438932	0.230881	1	-0.387617	0.835896	TE	TE	-0.435721	0.0704164	0.229095	0.167693	-0.661706	0.0172771	0.425379	0.0376496	translation
ENSMUSG00000041328	Pcf11	0.733266	0.0438932	-0.370961	1	0.362305	1	TE	TE	0.283724	0.406539	-0.471365	0.0325609	0.471938	0.33454	-0.509514	0.0573801	background
ENSMUSG00000050244	Heatr1	1.13615	0.0439373	0.221593	1	1.35775	0.00276778	TE	TE	1.34021	0.0123489	0.13993	0.596168	1.17359	0.0305147	-0.184667	0.597879	translation
ENSMUSG00000032526	Ss18l2	-0.554837	0.0439947	-0.312121	1	-0.866958	7.93139e-05	TE	TE	-0.917448	0.00130767	-0.384781	0.0140643	-0.676474	0.0657267	-0.20841	0.422573	abundance
ENSMUSG00000049536	Tceal1	-0.948395	0.0443057	-0.165143	1	-1.11354	0.00114444	TE	TE	-1.21526	0.00104765	-0.192094	0.407535	-1.2575	0.00475088	-0.33108	0.460146	translation
ENSMUSG00000032754	Slc8b1	1.04462	0.0444067	0.190482	1	1.2351	0.0176422	TE	TE	1.49881	0.0279092	0.116236	0.527808	1.61103	0.047351	0.183594	0.458782	translation
ENSMUSG00000030609	Aen	-0.760478	0.0445839	0.372915	1	-0.387563	0.904511	TE	TE	-0.434558	0.100345	0.373526	0.0882694	-0.484978	0.162363	0.414012	0.164343	background
ENSMUSG00000030536	Iqgap1	0.897247	0.045374	0.486296	0.909229	1.38354	3.80769e-06	TE	TE	1.28082	0.00163308	0.352435	0.162053	0.889967	0.0113306	-0.342114	0.273923	translation
ENSMUSG00000054808	Actn4	0.952115	0.045374	0.0999871	1	1.0521	0.00319396	TE	TE	0.977771	0.00639618	-0.171296	0.713588	1.0179	0.0133641	-0.603757	0.40718	translation
ENSMUSG00000034810	Scn7a	1.23813	0.0456259	0.0851225	1	1.32325	0.0027042	TE	TE	1.01394	0.0557556	-0.0655099	0.829298	1.12317	0.0115634	-0.456403	0.0748439	translation
ENSMUSG00000024120	Lrpprc	0.438153	0.0456465	-0.490876	0.242465	-0.0527225	1	TE	TE	-0.0667589	0.752304	-0.562158	0.00488337	0.0700011	0.831962	-0.54343	0.0220275	buffering
ENSMUSG00000001289	Pfdn5	-0.619275	0.0459256	-0.0391158	1	-0.658391	0.0343409	TE	TE	-0.681378	0.01608	-0.360627	0.473917	-0.650781	0.0462966	-0.12665	0.891335	translation
ENSMUSG00000038759	Nup205	0.889982	0.0459256	0.444142	1	1.33412	7.43209e-05	TE	TE	1.21608	0.0045371	0.382823	0.0281124	0.746193	0.167981	0.190417	0.442718	abundance
ENSMUSG00000045377	Tmem88	1.0298	0.0459256	0.398001	1	1.4278	0.00029679	TE	TE	1.4011	0.00136312	0.298197	0.205724	1.28217	0.0123447	0.0997014	0.837608	translation
ENSMUSG00000080268	Brms1	-0.865137	0.0459256	0.039051	1	-0.826086	0.0588948	TE	TE	-0.678771	0.0411741	0.0170287	0.918504	-0.689621	0.0693068	0.070397	0.74461	background
ENSMUSG00000033184	Tmed7	0.521484	0.0465407	-0.0684604	1	0.453024	0.444296	TE	TE	0.469161	0.0132499	-0.308541	0.397188	0.450261	0.0354415	0.025607	0.976491	translation
ENSMUSG00000028991	Mtor	0.648225	0.0467268	-0.135941	1	0.512283	0.499659	TE	TE	0.592769	0.0469187	-0.205912	0.184635	0.86389	0.0155005	-0.363671	0.0613225	translation
ENSMUSG00000033396	Spg11	0.769378	0.0467268	0.288522	1	1.0579	0.000751215	TE	TE	1.17538	0.0034547	0.195226	0.343593	0.939246	0.016966	-0.18134	0.527587	translation
ENSMUSG00000035024	Ncapd3	0.774332	0.0467268	-0.0117846	1	0.762547	0.113417	TE	TE	0.854635	0.0158723	-0.00276564	0.989953	0.852693	0.0310251	0.117401	0.656141	translation
ENSMUSG00000000827	Tpd52l2	-0.410683	0.0471622	0.000474178	1	-0.410209	0.41914	TE	TE	-0.45675	0.0457196	-0.0939122	0.558723	-0.477161	0.0738038	-0.138911	0.540701	background
ENSMUSG00000022906	Parp9	0.948043	0.0471622	0.566079	0.496742	1.51412	6.63522e-05	TE	TE	1.28752	0.0164631	0.301596	0.45105	1.16603	0.0557239	0.0323054	0.96096	background
ENSMUSG00000044037	Als2cl	1.02673	0.0471622	-0.0264148	1	1.00032	0.0405998	TE	TE	0.976529	0.00534201	-0.062075	0.784856	1.00136	0.0135567	-0.211543	0.547375	translation
ENSMUSG00000052920	Prkg1	0.659532	0.0471622	0.231454	1	0.890985	0.00424144	TE	TE	0.774025	0.0109987	0.00723305	0.985744	0.770734	0.015703	-0.524197	0.258764	translation
ENSMUSG00000039473	Ubn1	0.768761	0.0473589	-0.140442	1	0.628318	0.298494	TE	TE	0.534133	0.0894463	-0.227083	0.129038	0.754217	0.0657267	-0.303804	0.111453	background
ENSMUSG00000064030	Pym1	-0.8535	0.0473589	0.315815	1	-0.537685	0.452183	TE	TE	-0.570107	0.0465067	0.348198	0.130026	-0.622229	0.0893426	0.40467	0.220195	background
ENSMUSG00000001911	Nfix	-0.64652	0.0482672	-0.0527075	1	-0.699227	0.0390968	TE	TE	-0.769101	0.00600702	-0.0167518	0.943869	-0.757481	0.0111275	0.328718	0.268265	translation
ENSMUSG00000020841	Cpd	0.336011	0.0482672	0.379588	0.472653	0.715598	5.18916e-06	TE	TE	0.672903	0.00182262	0.3149	0.0156681	0.461801	0.0769281	0.115448	0.61054	abundance
ENSMUSG00000047497	Adamts12	1.67459	0.0482672	1.52469	0.000575275	3.19928	2.33397e-07	RNA+Ribo	concordant (intensified)	2.73077	0.000469566	1.47064	0.000561224	2.68735	0.056298	1.45243	0.0392733	abundance
ENSMUSG00000041506	Rrp9	-0.604102	0.0486196	-0.0283007	1	-0.632402	0.0820355	TE	TE	-0.599461	0.0125816	-0.0653118	0.688512	-0.570794	0.0338022	0.0504927	0.851054	translation
ENSMUSG00000032377	Plscr4	1.16501	0.0486395	0.333337	1	1.49835	0.000518796	TE	TE	1.56111	0.00213892	0.202026	0.431457	1.30724	0.00757175	-0.336495	0.332923	translation
ENSMUSG00000032855	Pkd1	1.09792	0.0493799	0.435679	1	1.5336	0.000172236	TE	TE	1.35298	0.00586958	0.327698	0.150207	0.907218	0.0613554	-0.0537808	0.875755	background
ENSMUSG00000058407	Txndc9	0.781696	0.0493867	-0.183212	1	0.598484	0.23019	TE	TE	0.551561	0.0621669	-0.153424	0.427826	0.596807	0.0910492	-0.212317	0.418578	background
ENSMUSG00000019189	Rnf145	0.83268	0.0494446	0.659601	0.0431444	1.49228	3.46067e-05	RNA+Ribo	concordant (intensified)	1.55039	0.00104969	0.635671	0.000221468	0.957335	0.473652	0.582351	0.0137857	abundance
ENSMUSG00000036585	Fgf1	-0.505407	0.0497799	-0.800475	0.000295413	-1.30588	9.4416e-15	RNA+Ribo	concordant (intensified)	-1.35261	4.22448e-05	-0.787665	0.000581692	-1.25865	0.00998108	-0.670257	0.191426	translation
ENSMUSG00000044340	Phlpp1	0.589411	0.0499311	-0.0227109	1	0.566701	0.180945	TE	TE	0.549617	0.0195468	-0.122393	0.514707	0.565395	0.0398008	-0.174718	0.55808	translation
ENSMUSG00000019795	Pcmt1	-0.45445	0.0501535	0.134655	1	-0.319795	1	Unchanged		-0.36102	0.0604902	0.125821	0.39081	-0.45987	0.0309471	0.335319	0.0664367	translation
ENSMUSG00000034269	Setd5	0.739162	0.0502748	-0.0275932	1	0.711569	0.112639	Unchanged		0.528729	0.191808	-0.11038	0.502229	0.51979	0.290819	-0.106237	0.616178	background
ENSMUSG00000020220	Vps13d	0.974518	0.050664	-0.438188	1	0.536329	0.802858	Unchanged		0.693239	0.0860134	-0.529576	0.0200237	0.881438	0.152783	-0.585932	0.0522355	background
ENSMUSG00000002767	Mrpl2	-0.649613	0.050937	-0.0757041	1	-0.725318	0.0168016	Ribo	Ribo exclusive	-0.755633	0.00769191	-0.141826	0.347343	-0.716556	0.032032	-0.0903861	0.72185	translation
ENSMUSG00000006527	Sfmbt1	0.77936	0.0512716	-0.076844	1	0.702516	0.203109	Unchanged		0.484279	0.202985	-0.0521894	0.764812	0.505846	0.254571	-0.0759417	0.732876	background
ENSMUSG00000027131	Emc4	-0.616761	0.0513079	-0.127101	1	-0.743862	0.00891817	Ribo	Ribo exclusive	-0.767693	0.00556028	-0.110212	0.529197	-0.712837	0.0219762	0.048843	0.87652	translation
ENSMUSG00000031698	Mylk3	-0.549915	0.0513418	-0.0633333	1	-0.613248	0.0443202	Ribo	Ribo exclusive	-0.65139	0.00877812	-0.146932	0.400406	-0.582314	0.0348521	0.0331158	0.916177	translation
ENSMUSG00000039967	Zfp292	0.730232	0.0513418	-0.188928	1	0.541304	0.406044	Unchanged		0.373633	0.28451	-0.26827	0.114193	0.169509	0.73201	-0.219875	0.282211	background
ENSMUSG00000028467	Gba2	0.672933	0.0514001	-0.253227	1	0.419706	1	Unchanged		0.411302	0.120407	-0.442577	0.122006	0.536667	0.102843	-0.594472	0.114735	background
ENSMUSG00000038712	Mindy1	-0.583114	0.0514001	-0.0429091	1	-0.626023	0.0649855	Unchanged		-0.603107	0.00467644	-0.237607	0.467748	-0.600805	0.014851	-0.204042	0.796154	translation
ENSMUSG00000021973	Micu2	-0.482029	0.0515655	0.273367	1	-0.208662	1	Unchanged		-0.220188	0.312019	0.25505	0.0930054	-0.365577	0.173249	0.31581	0.0868564	background
ENSMUSG00000051747	Ttn	1.2082	0.0519644	-0.858404	0.244601	0.349796	1	Unchanged		0.246721	0.584643	-1.02017	0.00270208	0.507352	0.537372	-1.04401	0.014487	buffering
ENSMUSG00000002028	Kmt2a	0.863541	0.0525034	-0.0514314	1	0.81211	0.0552889	Unchanged		0.719143	0.0196442	-0.117496	0.622819	0.760216	0.0326444	-0.260981	0.446584	translation
ENSMUSG00000022914	Brwd1	0.579712	0.0525034	-0.332064	1	0.247648	1	Unchanged		0.170061	0.484438	-0.547527	0.101913	0.361554	0.17847	-0.699292	0.0551604	background
ENSMUSG00000021338	Carmil1	1.06469	0.0525685	-0.141009	1	0.923677	0.133068	Unchanged		0.759508	0.0907001	-0.237932	0.234246	0.941514	0.0907654	-0.323048	0.206231	background
ENSMUSG00000026641	Usf1	-0.863702	0.0525685	0.394286	1	-0.469416	0.687673	Unchanged		-0.498171	0.091828	0.538737	0.113683	-0.554545	0.143833	0.612462	0.190282	background
ENSMUSG00000041231	Ublcp1	-0.924808	0.0525685	-0.55564	0.605109	-1.48045	4.55493e-05	Ribo	Ribo exclusive	-1.92465	0.0106383	-0.552123	0.0139883	-2.48987	0.0349829	-0.676541	0.0410886	translation
ENSMUSG00000029227	Fip1l1	-0.521484	0.0529584	-0.192621	1	-0.714105	0.00481024	Ribo	Ribo exclusive	-0.675936	0.00697521	-0.274041	0.0520687	-0.63567	0.0567832	-0.245148	0.270306	background
ENSMUSG00000027944	Hax1	-1.39978	0.0530032	-0.0381506	1	-1.43793	0.00381844	Ribo	Ribo exclusive	-1.1991	0.0279092	0.0470878	0.892481	-1.21652	0.052655	0.175144	0.717397	background
ENSMUSG00000039929	Urb1	0.881546	0.0530162	-0.15833	1	0.723216	0.175353	Unchanged		0.709473	0.00386527	-0.039714	0.917472	0.711765	0.012077	-0.185649	0.808347	translation
ENSMUSG00000022587	Ly6e	0.671292	0.0533512	0.777227	0.018165	1.44852	8.05465e-11	RNA+Ribo	concordant (fwd)	1.39266	0.000147137	0.666356	0.00522724	0.819307	0.0292746	-0.0573301	0.898642	translation
ENSMUSG00000024493	Lars	0.439711	0.0536374	-0.00683579	1	0.432875	0.407781	Unchanged		0.414218	0.0461133	-0.177442	0.556009	0.44354	0.0619722	-0.411711	0.357187	background
ENSMUSG00000041992	Rapgef5	0.711604	0.0540649	-0.162464	1	0.54914	0.36927	Unchanged		0.447378	0.1592	-0.211687	0.22489	0.667692	0.071411	-0.317452	0.122676	background
ENSMUSG00000022412	Mief1	-0.753981	0.0543167	0.076426	1	-0.677555	0.156033	Unchanged		-0.649432	0.0103963	-0.0736547	0.81615	-0.663053	0.0220263	-0.307762	0.539904	translation
ENSMUSG00000047735	Samd9l	1.07172	0.0543939	0.280109	1	1.35183	0.00318597	Ribo	Ribo exclusive	1.11784	0.0272071	-0.042482	0.942871	1.14804	0.0149685	-0.815265	0.135717	translation
ENSMUSG00000003546	Klc4	-0.580944	0.0544826	0.05648	1	-0.524464	0.163456	Unchanged		-0.555865	0.00966521	-0.242561	0.605656	-0.595142	0.0138161	-1.12898	0.144537	translation
ENSMUSG00000007892	Rplp1	-0.745238	0.0544826	0.278552	1	-0.466686	0.568865	Unchanged		-0.443232	0.141782	0.114454	0.700461	-0.479153	0.162188	0.233498	0.524642	background
ENSMUSG00000038866	Zcchc2	0.939472	0.0544826	-0.0463217	1	0.89315	0.0579763	Unchanged		0.74791	0.0245663	-0.220846	0.396914	0.683655	0.0759461	-0.0889559	0.835037	background
ENSMUSG00000047721	Bola2	-0.883049	0.0552515	0.523642	0.829034	-0.359407	1	Unchanged		-0.430981	0.176091	0.405898	0.0291006	-0.642918	0.167848	0.460932	0.0512563	background
ENSMUSG00000033327	Tnxb	0.970557	0.0553791	-0.211649	1	0.758908	0.13588	Unchanged		0.723863	0.0532098	-0.309907	0.181834	0.822765	0.0823065	-0.387815	0.226211	background
ENSMUSG00000019804	Snx3	-0.697873	0.0555355	0.0804261	1	-0.617446	0.0948927	Unchanged		-0.59971	0.0290778	-0.227848	0.627654	-0.60912	0.057265	-0.311642	0.673178	background
ENSMUSG00000050552	Lamtor4	-0.907368	0.05578	-0.102728	1	-1.0101	0.00449131	Ribo	Ribo exclusive	-0.950245	0.01608	-0.287834	0.345464	-0.838677	0.0626093	-0.0683942	0.896091	background
ENSMUSG00000028080	Lrba	0.800385	0.0560017	-0.417247	1	0.383138	0.728604	Unchanged		0.467856	0.219234	-0.461811	0.0134644	0.845739	0.161249	-0.51772	0.0289019	buffering
ENSMUSG00000043940	Wdfy3	0.934946	0.0560017	0.200073	1	1.13502	0.0025318	Ribo	Ribo exclusive	1.26585	0.00814477	0.0704571	0.783419	1.22431	0.0228377	-0.104272	0.798268	translation
ENSMUSG00000116563		-0.793976	0.0563915	-0.280231	1	-1.07421	0.00049	Ribo	Ribo exclusive	-1.07921	0.00311394	-0.351443	0.0564454	-1.05306	0.0293385	-0.330978	0.286676	translation
ENSMUSG00000006307	Kmt2b	0.800037	0.0569721	-0.000728499	1	0.799309	0.0605361	Unchanged		0.653019	0.0531819	-0.0249831	0.893363	0.686223	0.049099	-0.177507	0.376075	translation
ENSMUSG00000021607	Mrpl36	-0.588015	0.0569721	0.00159357	1	-0.586422	0.111902	Unchanged		-0.605646	0.013199	0.0899572	0.735892	-0.613424	0.0296418	0.169207	0.712398	translation
ENSMUSG00000028476	Reck	1.15592	0.0570172	0.301686	1	1.4576	0.00202259	Ribo	Ribo exclusive	1.18561	0.017227	0.322015	0.242597	0.90641	0.0948207	0.0324018	0.941117	background
ENSMUSG00000026123	Plekhb2	-0.568412	0.057059	-0.36536	1	-0.933772	2.24502e-05	Ribo	Ribo exclusive	-0.964724	0.000496246	-0.621554	0.121739	-1.12336	0.000913989	-1.88136	0.0365172	translation
ENSMUSG00000015937	H2afy	-0.454956	0.0572131	-0.0543329	1	-0.509289	0.0938211	Unchanged		-0.531823	0.00627105	-0.146981	0.382673	-0.5591	0.0139319	-0.328905	0.343083	translation
ENSMUSG00000020923	Ubtf	-0.366732	0.0573019	0.0636202	1	-0.303112	1	Unchanged		-0.293404	0.100085	-0.0703631	0.768042	-0.292953	0.150196	-0.0633041	0.875434	background
ENSMUSG00000049076	Acap2	0.902952	0.0573019	0.0399487	1	0.942901	0.0212281	Ribo	Ribo exclusive	0.856032	0.0395487	-0.227877	0.60302	0.983307	0.0260286	-0.704358	0.167703	translation
ENSMUSG00000027931	Npr1	0.894868	0.0573484	0.350582	1	1.24545	0.000388659	Ribo	Ribo exclusive	1.2083	0.00319182	0.212495	0.39606	1.07177	0.0161259	-0.108349	0.809452	translation
ENSMUSG00000026279	Thap4	-0.458388	0.0579309	-0.168868	1	-0.627256	0.0197151	Ribo	Ribo exclusive	-0.625318	0.00617622	-0.179973	0.211111	-0.504529	0.0446489	0.0217577	0.934347	translation
ENSMUSG00000034055	Phka1	0.778955	0.0579309	-1.25759	1.30442e-05	-0.478638	0.608415	RNA	RNA exclusive	-0.580035	0.0557993	-1.19226	0.000915615	-0.982167	0.078808	-1.37349	0.00819003	buffering
ENSMUSG00000049305	Ccdc71	-0.547269	0.0579309	0.255055	1	-0.292214	1	Unchanged		-0.295062	0.233517	0.253177	0.0656845	-0.338948	0.341557	0.263692	0.126913	background
ENSMUSG00000026153	Fam135a	0.884391	0.0580694	-0.306299	1	0.578092	0.703468	Unchanged		0.392737	0.296461	-0.637468	0.213926	0.525734	0.245603	-0.788755	0.203368	background
ENSMUSG00000028053	Ash1l	0.669137	0.0580694	-0.2014	1	0.467737	0.560821	Unchanged		0.444679	0.131084	-0.277117	0.13746	0.425306	0.270958	-0.266615	0.279538	background
ENSMUSG00000015597	Zfp318	0.663779	0.0581003	-0.126981	1	0.536798	0.61771	Unchanged		0.459748	0.0799377	-0.170593	0.287908	0.657581	0.0250522	-0.331548	0.07706	translation
ENSMUSG00000029202	Pds5a	0.638672	0.058186	0.0357086	1	0.67438	0.0550993	Unchanged		0.536055	0.0907001	-0.149224	0.61897	0.639633	0.0472708	-0.449639	0.156427	translation
ENSMUSG00000036333	Kidins220	0.561768	0.0602277	-0.126414	1	0.435354	0.511645	Unchanged		0.385253	0.0998993	-0.193909	0.279243	0.361174	0.204212	-0.165365	0.50576	background
ENSMUSG00000030629	Zfand6	-0.739453	0.0607494	-0.299436	1	-1.03889	0.000271772	Ribo	Ribo exclusive	-1.09816	0.00511109	-0.386109	0.0195182	-0.665448	0.211974	-0.230122	0.319536	abundance
ENSMUSG00000019790	Stxbp5	0.698134	0.0608817	-0.0525819	1	0.645552	0.366495	Unchanged		0.584012	0.0962437	-0.046137	0.78258	0.601192	0.141377	-0.0729511	0.740582	background
ENSMUSG00000027893	Ahcyl1	0.4534	0.0608817	-0.401135	0.722467	0.0522644	1	Unchanged		0.0266502	0.900778	-0.449522	0.0087042	0.253424	0.332898	-0.461895	0.0202769	buffering
ENSMUSG00000040481	Bptf	0.619013	0.0608817	-0.0903015	1	0.528711	0.321952	Unchanged		0.526084	0.0532902	0.230176	0.701516	0.550077	0.0772178	0.526425	0.528115	background
ENSMUSG00000042032	Mat2b	-0.456844	0.0608817	-0.151667	1	-0.608512	0.0336499	Ribo	Ribo exclusive	-0.623513	0.00954517	-0.234287	0.115275	-0.521083	0.0714079	-0.122754	0.617528	background
ENSMUSG00000060969	Irx1	-0.921461	0.0608817	-0.113529	1	-1.03499	0.0072672	Ribo	Ribo exclusive	-1.13665	0.00575124	-0.127761	0.504545	-0.939333	0.0160881	0.197934	0.40654	translation
ENSMUSG00000071647	Eml3	0.891183	0.0609314	0.216682	1	1.10787	0.00776662	Ribo	Ribo exclusive	0.91659	0.0110795	0.225741	0.233542	0.972987	0.0302531	0.282999	0.332678	translation
ENSMUSG00000001910	Nacc1	-0.76052	0.0612726	0.286243	1	-0.474277	0.648885	Unchanged		-0.551695	0.132106	0.122961	0.666962	-0.610937	0.138983	0.252009	0.462002	background
ENSMUSG00000021546	Hnrnpk	0.944052	0.0614427	-0.110067	1	0.833985	0.0673337	Unchanged		0.840408	0.0325375	-0.259421	0.312177	0.786129	0.0973379	-0.19207	0.61886	background
ENSMUSG00000022142	Nup155	0.839028	0.0614427	0.163733	1	1.00276	0.00644203	Ribo	Ribo exclusive	0.82123	0.0682504	0.220418	0.345571	0.905921	0.0988385	0.287195	0.356809	background
ENSMUSG00000022623	Shank3	0.816151	0.0614427	-0.155207	1	0.660944	0.142809	Unchanged		0.590968	0.0460736	-0.187004	0.462437	0.704192	0.0317389	-0.445626	0.157422	translation
ENSMUSG00000027799	Nbea	0.746845	0.0614427	0.14093	1	0.887775	0.0144439	Ribo	Ribo exclusive	1.07847	0.011259	0.12907	0.458518	1.12332	0.028592	0.175578	0.495872	translation
ENSMUSG00000034312	Iqsec1	0.537495	0.0614427	-0.230402	1	0.307093	1	Unchanged		0.295909	0.194439	-0.401384	0.160033	0.302982	0.284624	-0.412379	0.282211	background
ENSMUSG00000037361	Sf3b6	-0.942916	0.0614427	0.0592147	1	-0.883701	0.0498088	Ribo	Ribo exclusive	-1.02081	0.0275209	0.0761404	0.736662	-0.970161	0.0633637	-0.0393595	0.908296	background
ENSMUSG00000048612	Myof	1.00191	0.0614427	1.03292	0.00785164	2.03482	2.48541e-09	RNA+Ribo	concordant (fwd)	1.9532	6.05562e-05	0.661165	0.222466	1.67628	0.000623072	-1.5455	0.147987	translation
ENSMUSG00000056204	Pgpep1	-0.672552	0.0614427	-0.0414964	1	-0.714048	0.039095	Ribo	Ribo exclusive	-0.710252	0.0124592	0.0125219	0.958698	-0.722236	0.0109619	0.388432	0.112389	translation
ENSMUSG00000020154	Ptprb	0.810957	0.0615071	-0.214141	1	0.596816	0.318266	Unchanged		0.475466	0.214069	-0.314472	0.114278	0.894013	0.0423165	-0.446325	0.0471302	translation
ENSMUSG00000047238	Mageh1	-0.900498	0.061657	0.45254	1	-0.447958	1	Unchanged		-0.512645	0.0971078	0.627639	0.105794	-0.604039	0.128216	0.751124	0.153627	background
ENSMUSG00000027961	Lrrc39	-0.69929	0.0618227	-0.368412	1	-1.0677	0.000280647	Ribo	Ribo exclusive	-1.05614	0.00621223	-0.393943	0.0326323	-1.1888	0.0317918	-0.461806	0.105922	translation
ENSMUSG00000035158	Mitf	-0.568284	0.0618227	-0.525155	0.339467	-1.09344	1.33965e-06	Ribo	Ribo exclusive	-1.08774	0.000272414	-0.837784	0.0883129	-1.04269	0.00375436	-0.445956	0.752208	translation
ENSMUSG00000035521	Gnptg	-0.695728	0.0620659	0.36612	1	-0.329608	1	Unchanged		-0.341733	0.134352	0.278267	0.159621	-0.204513	0.455501	0.132941	0.605515	background
ENSMUSG00000018707	Dync1h1	0.993556	0.0627532	0.167972	1	1.16153	0.00571529	Ribo	Ribo exclusive	1.47545	0.00513919	0.106368	0.617806	1.25533	0.00692484	-0.305658	0.185633	translation
ENSMUSG00000026617	Bpnt1	-0.747949	0.0631313	-0.0104282	1	-0.758377	0.0523052	Unchanged		-0.973252	0.0512004	-0.023753	0.895892	-0.919422	0.0621828	0.119199	0.538511	background
ENSMUSG00000002379	Ndufa11	-0.681537	0.0631977	-0.122929	1	-0.804466	0.00945195	Ribo	Ribo exclusive	-0.761759	0.00935796	-0.21148	0.323616	-0.648771	0.0437997	0.0328891	0.930361	translation
ENSMUSG00000026087	Mrpl30	-0.817232	0.063403	-0.213587	1	-1.03082	0.00268175	Ribo	Ribo exclusive	-0.965142	0.0112648	-0.29643	0.0616231	-1.26632	0.0177431	-0.420037	0.068013	translation
ENSMUSG00000020868	Xylt2	0.905294	0.0635176	0.439117	0.984794	1.34441	0.00111657	Ribo	Ribo exclusive	1.18218	0.00204963	0.471056	0.0465704	0.93033	0.0412983	0.188012	0.656356	translation
ENSMUSG00000028763	Hspg2	0.71283	0.0635176	0.559295	0.5001	1.27212	1.7236e-06	Ribo	Ribo exclusive	1.21172	0.000228382	0.462664	0.105959	1.01702	0.00404532	-0.34022	0.590382	translation
ENSMUSG00000054874	Pcnx3	0.970521	0.0635176	0.631591	0.460183	1.60211	2.88073e-05	Ribo	Ribo exclusive	1.73278	0.00314872	0.539997	0.0116355	2.01716	0.0274948	0.63596	0.060828	translation
ENSMUSG00000030737	Slco2b1	0.810753	0.0636888	0.122732	1	0.933485	0.036021	Ribo	Ribo exclusive	0.936284	0.00881882	0.200486	0.456554	0.913207	0.0294815	0.136379	0.776314	translation
ENSMUSG00000006281	Tep1	0.916015	0.0642271	0.302496	1	1.21851	0.00219574	Ribo	Ribo exclusive	1.24989	0.00283727	-0.0288517	0.961593	1.25707	0.00812268	-0.59599	0.49274	translation
ENSMUSG00000029198	Grpel1	-0.523794	0.0642271	-0.305817	1	-0.829611	0.000284216	Ribo	Ribo exclusive	-0.874871	0.00104015	-0.396423	0.023537	-1.0447	0.00465892	-0.633278	0.0644271	translation
ENSMUSG00000037339	Fam53a	-0.747087	0.0642271	-0.268972	1	-1.01606	0.00617474	Ribo	Ribo exclusive	-1.19384	0.00374635	-0.200977	0.344844	-1.00402	0.0213027	0.102266	0.771303	translation
ENSMUSG00000004642	Slbp	-0.586934	0.0649186	0.0454294	1	-0.541504	0.220213	Unchanged		-0.557937	0.0089274	-0.0514306	0.777787	-0.575491	0.0172771	-0.244616	0.402718	translation
ENSMUSG00000031792	Usb1	-0.77985	0.064947	0.451734	0.969509	-0.328116	1	Unchanged		-0.384673	0.207365	0.581163	0.055626	-0.394835	0.349657	0.587697	0.132921	background
ENSMUSG00000015776	Med22	-0.627997	0.0650086	0.435791	0.885814	-0.192205	1	Unchanged		-0.234345	0.296841	0.476712	0.0355494	-0.446262	0.108966	0.604977	0.030576	buffering
ENSMUSG00000020400	Tnip1	-0.589915	0.0650086	0.581328	0.30416	-0.00858694	1	Unchanged		-0.0388712	0.876202	0.488024	0.0168893	0.0114208	0.975863	0.48441	0.0451981	buffering
ENSMUSG00000031516	Dctn6	-0.465989	0.0650086	-0.311612	1	-0.777601	0.000396068	Ribo	Ribo exclusive	-0.813297	0.000830792	-0.535739	0.116961	-0.893617	0.0027664	-1.21326	0.144658	translation
ENSMUSG00000022442	Ttll1	-1.43372	0.0651349	-1.06028	0.252241	-2.494	5.08813e-08	Ribo	Ribo exclusive	-2.89695	0.000443145	-1.14487	6.60628e-05	-5.20934	0.0137539	-1.42478	0.00579492	translation
ENSMUSG00000023089	Ndufa5	-0.572783	0.0651905	-0.577856	0.201792	-1.15064	5.60356e-08	Ribo	Ribo exclusive	-1.21149	0.000192449	-0.652021	0.000554985	-1.50289	0.0138965	-0.790313	0.0205892	translation
ENSMUSG00000024130	Abca3	0.67863	0.0651905	0.128987	1	0.807617	0.0439484	Ribo	Ribo exclusive	0.716847	0.0396352	-0.00684996	0.978238	0.722657	0.0529342	-0.183356	0.489828	background
ENSMUSG00000038102	Trappc11	0.484915	0.0651905	0.00198616	1	0.486901	0.331783	Unchanged		0.476348	0.0174503	0.0394246	0.841579	0.490966	0.0284183	0.297929	0.304725	translation
ENSMUSG00000041112	Elmo1	0.959188	0.0651905	0.321742	1	1.28093	0.00364953	Ribo	Ribo exclusive	1.0376	0.0525447	0.259379	0.105003	0.860971	0.24192	0.221247	0.29813	background
ENSMUSG00000007877	Tcap	-1.09194	0.0653719	-0.0758079	1	-1.16775	0.00480957	Ribo	Ribo exclusive	-1.32292	0.00479244	-0.219772	0.482331	-1.37197	0.0142568	-0.354666	0.492517	translation
ENSMUSG00000025373	Rnf41	-0.692308	0.0653926	0.25718	1	-0.435128	1	Unchanged		-0.576631	0.123178	0.0948042	0.696688	-0.568784	0.195851	0.0798001	0.815463	background
ENSMUSG00000040365	Trim41	-0.707859	0.0654929	0.260631	1	-0.447228	0.761218	Unchanged		-0.550623	0.0946108	0.271744	0.155416	-0.385433	0.353139	0.180474	0.467489	background
ENSMUSG00000027889	Ampd2	0.959678	0.0655193	0.968588	0.00165072	1.92827	2.3649e-06	RNA+Ribo	concordant (fwd)	1.92242	1.79957e-05	1.01412	0.00109687	2.52226	0.000623072	1.95472	0.0152657	translation
ENSMUSG00000024899	Papss2	0.699773	0.0658441	0.194158	1	0.893931	0.00807858	Ribo	Ribo exclusive	0.98523	0.00240066	0.261689	0.260498	1.03962	0.00897823	0.401061	0.3488	translation
ENSMUSG00000020628	Trappc12	-0.395183	0.0663646	0.0147756	1	-0.380407	0.424685	Unchanged		-0.399739	0.0246846	-0.0524041	0.754171	-0.389234	0.0521146	0.105967	0.735075	background
ENSMUSG00000026568	Mpc2	-0.821352	0.0663646	-0.365478	1	-1.18683	0.000134205	Ribo	Ribo exclusive	-1.10112	0.00502982	-0.4245	0.0110722	-0.499294	0.364465	-0.237711	0.273923	abundance
ENSMUSG00000027007	Itprid2	0.717882	0.0663646	0.240944	1	0.958826	0.00804215	Ribo	Ribo exclusive	0.9419	0.00349946	0.127275	0.549085	0.960639	0.0117159	0.193761	0.60904	translation
ENSMUSG00000030802	Bckdk	-0.513881	0.0663646	-0.0821149	1	-0.595996	0.0434028	Ribo	Ribo exclusive	-0.642838	0.0100985	-0.197017	0.300374	-0.665698	0.0268631	-0.251435	0.430223	translation
ENSMUSG00000034731	Dgkh	1.09556	0.0666568	-0.275861	1	0.8197	0.211419	Unchanged		0.573075	0.159851	-0.478109	0.110132	0.927122	0.0587312	-0.677876	0.0573359	background
ENSMUSG00000002748	Baz1b	0.448892	0.0667843	-0.229179	1	0.219713	1	Unchanged		0.210306	0.248977	-0.338687	0.0821599	0.334658	0.110397	-0.518524	0.0365172	buffering
ENSMUSG00000024104	Washc2	0.550949	0.0667843	-0.178047	1	0.372902	0.695818	Unchanged		0.391782	0.0662472	-0.260813	0.205724	0.569138	0.0147663	-0.605356	0.0169413	translation
ENSMUSG00000025224	Gbf1	0.759595	0.0668139	0.0364081	1	0.796003	0.0237548	Ribo	Ribo exclusive	0.950799	0.0125828	-0.0189103	0.918579	0.979938	0.0137108	-0.22328	0.285092	translation
ENSMUSG00000079057	Cyp4v3	1.24504	0.0668139	0.56503	0.669046	1.81007	0.00190503	Ribo	Ribo exclusive	1.67589	0.000247743	0.601539	0.0170402	1.59095	0.0098662	0.505092	0.332323	translation
ENSMUSG00000045103	Dmd	0.857012	0.0671935	-0.343471	1	0.513541	0.52176	Unchanged		0.410159	0.23781	-0.451743	0.0687307	0.32395	0.507282	-0.416732	0.180853	background
ENSMUSG00000027951	Adar	0.666188	0.0673992	0.351032	1	1.01722	0.000868509	Ribo	Ribo exclusive	0.930441	0.00214204	0.0580739	0.90632	0.920227	0.00751777	-0.508156	0.553291	translation
ENSMUSG00000115987	Vps28	-0.458985	0.0673992	0.033237	1	-0.425748	0.31253	Unchanged		-0.45295	0.0335111	-0.104467	0.61688	-0.498329	0.0352505	-0.359353	0.201629	translation
ENSMUSG00000024759	Atl3	0.893624	0.0674717	0.354633	1	1.24826	0.000783672	Ribo	Ribo exclusive	1.07826	0.0208232	0.306393	0.0485894	0.547158	0.377762	0.179712	0.36938	abundance
ENSMUSG00000033799	Fam208b	0.75633	0.0674717	-0.0503251	1	0.706005	0.218607	Unchanged		0.684211	0.0738672	-0.0062081	0.982065	0.679397	0.103242	0.128791	0.653774	background
ENSMUSG00000035048	Anapc13	-0.582646	0.0674717	-0.370311	1	-0.952957	5.46178e-05	Ribo	Ribo exclusive	-1.02105	0.00171744	-0.350399	0.0391024	-0.916331	0.0300293	-0.262161	0.378507	translation
ENSMUSG00000038663	Fsd2	-0.591257	0.0674717	-0.471257	0.617028	-1.06251	4.23251e-06	Ribo	Ribo exclusive	-1.13537	0.000915735	-0.528907	0.00314783	-0.289445	0.443816	-0.122966	0.565515	abundance
ENSMUSG00000041415	Dicer1	0.906559	0.0674717	-0.147147	1	0.759412	0.179481	Unchanged		0.513669	0.265358	-0.525841	0.389063	0.744021	0.118911	-0.883557	0.167169	background
ENSMUSG00000024665	Fads2	1.24797	0.0675284	1.34817	0.000251379	2.59614	1.75028e-07	RNA+Ribo	concordant (fwd)	2.3667	6.28043e-06	1.30638	0.000486771	2.07044	0.00597917	0.851898	0.363016	translation
ENSMUSG00000027502	Rtf2	-0.477645	0.0675284	0.16466	1	-0.312985	1	Unchanged		-0.319371	0.0933967	-0.0231536	0.941169	-0.319098	0.14217	-0.00819681	0.985188	background
ENSMUSG00000061589	Dot1l	0.874773	0.0676419	-0.496174	0.896444	0.378599	1	Unchanged		0.275984	0.416453	-0.54204	0.0209553	0.584271	0.221092	-0.6028	0.0342364	buffering
ENSMUSG00000024833	Pola2	0.864393	0.0681807	0.239212	1	1.1036	0.0140541	Ribo	Ribo exclusive	1.25381	0.00249526	0.313025	0.178815	1.27132	0.0137911	0.33843	0.418964	translation
ENSMUSG00000041879	Ipo9	0.6196	0.0683435	0.355919	1	0.975519	0.000243994	Ribo	Ribo exclusive	0.9667	0.00290904	-0.000917681	0.999082	0.967	0.00372848	-1.38836	0.0801941	translation
ENSMUSG00000031959	Wdr59	0.745627	0.0684901	0.0601498	1	0.805777	0.0894963	Unchanged		0.751496	0.0506029	-0.0730881	0.737047	0.799095	0.0666759	-0.184345	0.505592	background
ENSMUSG00000034342	Cbl	0.616155	0.0684901	0.245048	1	0.861203	0.00628054	Ribo	Ribo exclusive	0.751604	0.00453635	-0.000823371	0.998849	0.751725	0.0129011	-0.331598	0.632636	translation
ENSMUSG00000038024	Dennd4c	0.532935	0.0686599	-0.403557	1	0.129378	1	Unchanged		0.129629	0.581451	-0.456525	0.0127235	0.154276	0.678556	-0.460528	0.03813	buffering
ENSMUSG00000019710	Mrpl24	-0.461646	0.0689598	-0.0999155	1	-0.561562	0.0558671	Unchanged		-0.606738	0.00817256	-0.242136	0.239173	-0.681368	0.0135567	-0.485721	0.169356	translation
ENSMUSG00000027882	Stxbp3	0.658205	0.0689598	0.193584	1	0.851789	0.0170524	Ribo	Ribo exclusive	0.761881	0.0109272	0.218934	0.183869	0.840521	0.0268631	0.295581	0.239837	translation
ENSMUSG00000045948	Mrps12	-0.701671	0.0689598	0.120207	1	-0.581465	0.24654	Unchanged		-0.57264	0.0604016	0.091995	0.554559	-0.609087	0.0916642	0.129509	0.52887	background
ENSMUSG00000010376	Nedd8	-0.829424	0.0692553	0.0895819	1	-0.739842	0.0907447	Unchanged		-0.803624	0.0227053	0.162852	0.55565	-0.732152	0.0627729	-0.0392068	0.930234	background
ENSMUSG00000021614	Vcan	1.13999	0.0692553	1.1544	0.038587	2.29439	1.06069e-08	RNA+Ribo	concordant (fwd)	2.09492	0.000437358	0.870259	0.101883	1.34345	0.000761152	-1.25435	0.0140685	translation
ENSMUSG00000025147	Mob2	-0.630476	0.0695024	-0.118773	1	-0.749249	0.0267949	Ribo	Ribo exclusive	-0.804218	0.0117662	-0.164105	0.307287	-0.583568	0.0671482	0.0600828	0.793513	background
ENSMUSG00000026672	Optn	-0.574248	0.0695024	-0.845016	0.00155874	-1.41926	1.54727e-12	RNA+Ribo	concordant (fwd)	-1.47368	5.6801e-05	-0.970919	0.00109235	-1.17978	0.0152351	-0.508103	0.435153	translation
ENSMUSG00000078619	Smarcd2	0.77816	0.0695024	0.331658	1	1.10982	0.000814405	Ribo	Ribo exclusive	1.12	0.00137902	0.127425	0.693009	1.12797	0.00608104	0.206851	0.758577	translation
ENSMUSG00000024208	Uqcc2	-0.620275	0.0695335	-0.221371	1	-0.841646	0.00351482	Ribo	Ribo exclusive	-0.877569	0.0021316	-0.290078	0.0945566	-0.887682	0.0142568	-0.304411	0.344332	translation
ENSMUSG00000035885	Cox8a	-0.556497	0.0700361	0.131261	1	-0.425236	0.671285	Unchanged		-0.411923	0.0731796	-0.139815	0.758228	-0.409066	0.122418	-0.0984023	0.892517	background
ENSMUSG00000022016	Akap11	0.735568	0.0702555	0.0371447	1	0.772713	0.0513889	Unchanged		0.676761	0.0518567	0.0328364	0.873262	0.677062	0.094661	0.0342228	0.908008	background
ENSMUSG00000025017	Pik3ap1	1.81609	0.0702555	1.36281	0.0571017	3.1789	1.61245e-06	Ribo	Ribo exclusive	2.77979	6.05562e-05	1.58522	0.0063018	2.37453	0.00840786	0.818527	0.535262	translation
ENSMUSG00000026958	Dpp7	1.25882	0.0702555	0.548496	0.704048	1.80731	0.000364307	Ribo	Ribo exclusive	1.82824	0.000608364	0.699066	0.0584247	1.95521	0.00590905	0.917925	0.213691	translation
ENSMUSG00000027351	Spred1	0.942418	0.0702555	0.58885	0.440452	1.53127	0.000149421	Ribo	Ribo exclusive	1.12825	0.0315937	0.501394	0.014243	0.462166	0.567114	0.35514	0.156388	abundance
ENSMUSG00000006392	Med8	-0.666425	0.0706112	0.0583187	1	-0.608106	0.173786	Unchanged		-0.645587	0.0248539	-0.0810768	0.755457	-0.569035	0.0218026	0.395228	0.0868564	translation
ENSMUSG00000070423	Olfr558	1.81379	0.0707556	0.589243	1	2.40303	0.00190068	Ribo	Ribo exclusive	2.21374	0.00337532	0.503672	0.361728	1.89318	0.0166769	-0.318596	0.724257	translation
ENSMUSG00000027030	Stk39	-0.466295	0.0714211	-0.295066	1	-0.76136	0.00108524	Ribo	Ribo exclusive	-0.775587	0.00150218	-0.689945	0.244917	-0.747998	0.00843918	-0.222613	0.891359	translation
ENSMUSG00000022517	Mgrn1	-0.461122	0.0716286	-0.340812	1	-0.801934	0.000172677	Ribo	Ribo exclusive	-0.807671	0.00136889	-0.402946	0.0112265	-0.635094	0.0521146	-0.237574	0.395958	abundance
ENSMUSG00000029016	Clcn6	0.669079	0.0719109	0.309161	1	0.97824	0.00346605	Ribo	Ribo exclusive	0.893939	0.00668884	0.126498	0.661299	0.910067	0.0178393	0.221415	0.65115	translation
ENSMUSG00000001642	Akr1b3	-1.08627	0.0722189	-0.226294	1	-1.31256	0.00380609	Ribo	Ribo exclusive	-1.49638	0.0201457	-0.349403	0.187423	-1.35573	0.0895969	-0.261055	0.512471	background
ENSMUSG00000032374	Plod2	0.84681	0.0724922	0.17269	1	1.0195	0.0088734	Ribo	Ribo exclusive	0.836542	0.0529238	0.148769	0.390448	0.699536	0.164043	0.0669731	0.790004	background
ENSMUSG00000026483	Fam129a	0.736871	0.0727556	0.519314	0.869103	1.25619	1.16653e-05	Ribo	Ribo exclusive	1.2463	0.000359875	0.352672	0.177983	1.07655	0.00465892	-0.245333	0.659914	translation
ENSMUSG00000070733	Fryl	0.75942	0.0727556	-0.0119375	1	0.747483	0.0780524	Unchanged		0.867953	0.0307311	-0.0913166	0.644341	0.942796	0.0396104	-0.213422	0.407673	translation
ENSMUSG00000032050	Rdx	-0.530967	0.0727865	-0.14585	1	-0.676817	0.011405	Ribo	Ribo exclusive	-0.751081	0.0131026	-0.221631	0.121836	-0.801837	0.0458878	-0.25014	0.233944	translation
ENSMUSG00000021140	Pcnx	0.833099	0.0729371	0.0140796	1	0.847179	0.0531828	Unchanged		0.733669	0.0393615	-0.117673	0.662978	0.743204	0.0742473	-0.146682	0.714182	background
ENSMUSG00000068580	Zfyve19	-0.825777	0.072943	0.245686	1	-0.580091	0.497277	Unchanged		-0.631517	0.0994309	0.203661	0.159621	-0.82262	0.105572	0.251364	0.170986	background
ENSMUSG00000032407	U2surp	0.512062	0.0731772	-0.23891	1	0.273152	1	Unchanged		0.240468	0.350666	-0.272422	0.0748798	0.299398	0.401191	-0.286774	0.129732	background
ENSMUSG00000010290	AI597479	-0.655255	0.0732288	-0.0765503	1	-0.731805	0.0819548	Unchanged		-0.737514	0.00832558	-0.176313	0.342316	-0.685288	0.0341262	-0.0717668	0.830236	translation
ENSMUSG00000025813	Homer2	-0.574951	0.0732288	0.0310149	1	-0.543936	0.213704	Unchanged		-0.582912	0.0353116	-0.0322785	0.83809	-0.579803	0.0703064	-0.0212202	0.928759	background
ENSMUSG00000036402	Gng12	-0.938923	0.0732288	0.412043	1	-0.52688	0.579974	Unchanged		-0.705179	0.0970955	0.417119	0.196626	-1.05075	0.0281505	0.718194	0.0555754	translation
ENSMUSG00000053774	Ubxn7	0.483995	0.0733837	-0.413892	0.551993	0.0701036	1	Unchanged		0.0262151	0.924731	-0.43715	0.00227935	-0.364153	0.507486	-0.434398	0.0140685	buffering
ENSMUSG00000031274	Col4a5	0.646995	0.0735538	0.802338	0.0137014	1.44933	7.20075e-10	RNA+Ribo	concordant (fwd)	1.38237	7.10471e-05	0.682556	0.00527834	1.2875	0.00582793	0.510088	0.39233	translation
ENSMUSG00000029826	Zc3hav1	0.589429	0.0735583	0.303429	1	0.892859	0.00209229	Ribo	Ribo exclusive	0.821145	0.0055892	0.0115716	0.982844	0.816415	0.00607713	-1.043	0.0680898	translation
ENSMUSG00000025151	Maged1	-0.480264	0.0742027	0.424415	0.702726	-0.0558492	1	Unchanged		-0.0962975	0.6258	0.238398	0.414322	-0.131099	0.563045	0.30388	0.36832	background
ENSMUSG00000034602	Mon2	0.702293	0.0742027	-0.211028	1	0.491265	0.375578	Unchanged		0.604538	0.0584068	-0.296046	0.186178	0.803046	0.0367296	-0.480959	0.0972806	translation
ENSMUSG00000014294	Ndufa2	-0.589227	0.075	-0.164042	1	-0.753269	0.00709725	Ribo	Ribo exclusive	-0.807507	0.00443697	-0.210254	0.136718	-0.672461	0.047852	-0.0967305	0.680007	translation
ENSMUSG00000004891	Nes	1.38807	0.0753231	0.657511	0.946407	2.04558	9.59333e-05	Ribo	Ribo exclusive	2.14658	0.00497776	0.519927	0.0987219	1.41771	0.071527	0.0137707	0.977142	background
ENSMUSG00000040651	Fam208a	0.622983	0.0754779	-0.157977	1	0.465006	0.638335	Unchanged		0.42311	0.0922474	-0.203658	0.243572	0.607129	0.032032	-0.375692	0.0713264	translation
ENSMUSG00000003464	Pex19	-0.511222	0.0758333	0.010649	1	-0.500573	0.265652	Unchanged		-0.537784	0.0219606	-0.0148983	0.929108	-0.526389	0.0380599	0.139233	0.499389	translation
ENSMUSG00000021906	Oxnad1	-0.526031	0.0758333	-0.489825	0.585924	-1.01586	3.07878e-06	Ribo	Ribo exclusive	-1.06378	0.00041532	-0.475985	0.0115004	-1.08537	0.0098662	-0.50201	0.187263	translation
ENSMUSG00000022514	Il1rap	1.0995	0.0760309	0.566719	0.740513	1.66622	0.00063977	Ribo	Ribo exclusive	1.5541	0.00862308	0.551647	0.00601968	0.55584	0.542578	0.350852	0.154382	abundance
ENSMUSG00000040430	Pitpnc1	-0.70007	0.0760309	-0.358441	1	-1.05851	0.000365295	Ribo	Ribo exclusive	-1.19105	0.00398813	-0.390764	0.0276992	-1.20822	0.0432044	-0.398564	0.15183	translation
ENSMUSG00000026478	Lamc1	0.5917	0.0760398	0.551739	0.321933	1.14344	4.92968e-07	Ribo	Ribo exclusive	1.14293	0.00014787	0.379027	0.223763	1.08828	0.00192509	-0.0869945	0.930067	translation
ENSMUSG00000033392	Clasp2	0.41564	0.0760398	-0.506544	0.16389	-0.0909046	1	Unchanged		-0.0963416	0.660635	-0.572108	0.0021804	0.112468	0.773793	-0.550387	0.0152657	buffering
ENSMUSG00000022098	Bmp1	0.757173	0.0761134	0.854801	0.0215357	1.61197	9.84554e-09	RNA+Ribo	concordant (fwd)	1.51718	0.00011334	0.756614	0.0021804	1.0171	0.0364548	0.251832	0.591972	translation
ENSMUSG00000031543	Ank1	-0.579169	0.0762208	-0.366027	1	-0.945196	0.000108673	Ribo	Ribo exclusive	-0.981012	0.000885138	-0.451333	0.0253331	-1.23387	0.00260687	-0.827668	0.0354921	translation
ENSMUSG00000040174	Alkbh3	-0.546262	0.0763898	-0.245849	1	-0.792111	0.00424665	Ribo	Ribo exclusive	-0.863274	0.01069	-0.283424	0.0269365	-0.4457	0.393663	-0.200005	0.226211	abundance
ENSMUSG00000006095	Tbcb	-0.554737	0.0766351	0.34144	1	-0.213296	1	Unchanged		-0.24873	0.292156	0.0617085	0.896473	-0.256336	0.338171	0.197824	0.730282	background
ENSMUSG00000021967	Mrpl57	-0.665126	0.0767761	-0.00712145	1	-0.672247	0.0844198	Unchanged		-0.6825	0.00985644	-0.144172	0.534388	-0.739555	0.014981	-0.399311	0.258809	translation
ENSMUSG00000024383	Map3k2	0.643311	0.0767761	-0.109832	1	0.533479	0.488386	Unchanged		0.347044	0.350763	-0.100885	0.458131	0.2551	0.58474	-0.0811079	0.630141	background
ENSMUSG00000058600	Rpl30	-1.07992	0.0769258	-0.0515916	1	-1.13152	0.0219498	Ribo	Ribo exclusive	-1.29453	0.0260663	-0.12821	0.707989	-1.27376	0.0608823	-0.07016	0.898572	background
ENSMUSG00000037926	Ssh2	0.416926	0.0769985	-0.173191	1	0.243735	1	Unchanged		0.188484	0.39811	-0.244733	0.0950757	0.159936	0.602313	-0.236004	0.189977	background
ENSMUSG00000015605	Srf	-0.752864	0.0773516	0.393089	1	-0.359775	1	Unchanged		-0.408936	0.131032	0.26271	0.306961	-0.264568	0.375044	0.0539089	0.874786	background
ENSMUSG00000022010	Tsc22d1	-0.525151	0.0779265	0.139909	1	-0.385242	0.802858	Unchanged		-0.409253	0.0657078	-0.0266357	0.928379	-0.415318	0.0961649	-0.205029	0.593226	background
ENSMUSG00000042699	Dhx9	0.642716	0.078186	-0.193192	1	0.449524	0.484849	Unchanged		0.372842	0.204281	-0.167202	0.511379	0.278221	0.388834	-0.0207833	0.950974	background
ENSMUSG00000004317	Clcn5	1.23791	0.0782472	0.781189	0.176037	2.0191	0.000411049	Ribo	Ribo exclusive	1.85213	0.000255046	0.703175	0.00706253	1.64774	0.0192145	0.534983	0.286624	translation
ENSMUSG00000001707	Eef1e1	-0.887919	0.078331	0.480377	1	-0.407542	0.927837	Unchanged		-0.48359	0.139971	0.38052	0.0833859	-0.892108	0.0202174	0.580038	0.0253717	translation
ENSMUSG00000021957	Tkt	0.791887	0.078697	0.630248	0.429344	1.42213	6.6694e-06	Ribo	Ribo exclusive	1.30229	0.000755093	0.315642	0.543082	1.20892	0.00377307	-0.740154	0.430044	translation
ENSMUSG00000008668	Rps18	-1.60662	0.0791591	0.279755	1	-1.32686	0.0710609	Unchanged		-1.48732	0.0379399	0.0820198	0.874491	-1.51798	0.0639794	0.295955	0.669741	background
ENSMUSG00000031482	Slc25a15	-0.797736	0.0792816	0.0710782	1	-0.726657	0.306442	Unchanged		-0.822794	0.00754546	0.0472361	0.773229	-0.808781	0.0224009	-0.00333816	0.990368	translation
ENSMUSG00000039000	Ube3c	0.459057	0.0792816	0.0230799	1	0.482137	0.28899	Unchanged		0.429185	0.0852271	-0.169755	0.573258	0.464076	0.105922	-0.314636	0.434202	background
ENSMUSG00000021072	Tmx1	0.509911	0.0795037	-0.0802291	1	0.429682	0.534102	Unchanged		0.401659	0.0455373	-0.216105	0.362681	0.3516	0.118911	0.00869091	0.982564	background
ENSMUSG00000021514	Zfp369	0.592884	0.0795037	-0.143487	1	0.449397	0.617236	Unchanged		0.40578	0.0819193	-0.33734	0.260657	0.323606	0.229401	-0.120137	0.792479	background
ENSMUSG00000021706	Zfyve16	0.577514	0.0795037	-0.124179	1	0.453335	0.568765	Unchanged		0.342348	0.288764	-0.182433	0.144337	0.66487	0.109499	-0.22317	0.130834	background
ENSMUSG00000031805	Jak3	0.818336	0.0795037	0.446756	0.989226	1.26509	0.00112139	Ribo	Ribo exclusive	1.26228	0.00515249	0.45609	0.0315894	1.05846	0.0826984	0.346555	0.290957	abundance
ENSMUSG00000071669	Snx29	0.989506	0.0812329	0.224206	1	1.21371	0.00619473	Ribo	Ribo exclusive	1.33468	0.00150218	0.30869	0.298951	1.19125	0.0109619	-0.0928744	0.877036	translation
ENSMUSG00000059534	Uqcr10	-0.462619	0.0821392	-0.378869	1	-0.841488	3.83071e-05	Ribo	Ribo exclusive	-0.878321	0.000525249	-0.608689	0.0849115	-0.953053	0.00263853	-1.19855	0.18357	translation
ENSMUSG00000022808	Snx4	-0.55342	0.0822804	0.42957	0.911203	-0.12385	1	Unchanged		-0.140191	0.517163	0.195849	0.581227	-0.140077	0.586829	0.195509	0.661692	background
ENSMUSG00000026463	Atp2b4	0.725411	0.0822804	0.131415	1	0.856826	0.0235122	Ribo	Ribo exclusive	0.762307	0.0155354	-0.181727	0.709352	0.813438	0.0197499	-0.744361	0.262161	translation
ENSMUSG00000026775	Yme1l1	0.512511	0.0822804	-0.194574	1	0.317937	1	Unchanged		0.292233	0.194814	-0.389436	0.231182	0.223121	0.408612	-0.238447	0.583788	background
ENSMUSG00000035458	Tnni3	-0.634489	0.0822804	-0.923556	0.00185594	-1.55804	1.90821e-12	RNA+Ribo	concordant (fwd)	-1.6301	7.82747e-05	-1.01446	0.000221468	-2.03866	0.00873668	-1.2759	0.0192798	translation
ENSMUSG00000044934	Zfp367	-0.62988	0.0822804	0.219711	1	-0.410169	0.813109	Unchanged		-0.346439	0.286571	0.242503	0.130453	-0.401022	0.359357	0.255961	0.1985	background
ENSMUSG00000062078	Qk	-0.565006	0.0832989	-0.0034889	1	-0.568495	0.192776	Unchanged		-0.600875	0.0548419	-0.105585	0.603733	-0.512229	0.121006	0.0636642	0.816651	background
ENSMUSG00000000296	Tpd52l1	-1.08626	0.0834723	-0.680902	0.469224	-1.76717	8.81591e-07	Ribo	Ribo exclusive	-1.72096	0.000166303	-0.581241	0.147231	-1.42069	0.00249911	0.663996	0.389181	translation
ENSMUSG00000023008	Fmnl3	0.753983	0.0837792	0.800875	0.0522522	1.55486	1.51692e-07	Ribo	Ribo exclusive	1.5676	7.14135e-05	0.676117	0.0152476	1.49156	0.00371971	0.510092	0.465831	translation
ENSMUSG00000035325	Sec31a	0.479959	0.0841129	0.090662	1	0.570621	0.107248	Unchanged		0.551713	0.026488	0.0241364	0.869361	0.512595	0.0335485	-0.150961	0.328702	translation
ENSMUSG00000042992	Borcs5	-0.801905	0.0856129	0.242132	1	-0.559773	0.391269	Unchanged		-0.616053	0.068018	0.231394	0.223832	-0.440002	0.268695	0.111476	0.665544	background
ENSMUSG00000072582	Ptrh2	-0.66196	0.0856948	0.0459834	1	-0.615976	0.258956	Unchanged		-0.651974	0.01826	-0.0300389	0.874491	-0.634947	0.0376435	0.107388	0.68427	translation
ENSMUSG00000026814	Eng	0.505488	0.0858654	-0.10988	1	0.395608	1	Unchanged		0.364371	0.10235	-0.267821	0.368957	0.357652	0.175707	-0.245575	0.571702	background
ENSMUSG00000029310	Nudt9	-0.565068	0.0858654	-0.1584	1	-0.723468	0.0197151	Ribo	Ribo exclusive	-0.733505	0.0130612	-0.438088	0.291758	-0.754445	0.0335485	-0.526817	0.444026	translation
ENSMUSG00000032040	Dcps	-0.647099	0.0858654	0.262598	1	-0.384501	0.944788	Unchanged		-0.376319	0.140286	0.341246	0.159445	-0.541509	0.071411	0.521909	0.0811809	background
ENSMUSG00000044600	Smim7	-0.684918	0.0858654	0.00605596	1	-0.678862	0.0605361	Unchanged		-0.719237	0.0504029	0.0293102	0.873519	-0.707722	0.094846	-0.0109612	0.966607	background
ENSMUSG00000060187	Lrrc10	-0.415741	0.0858654	-0.601757	0.0478372	-1.0175	1.67542e-08	RNA+Ribo	concordant (fwd)	-1.02985	8.24131e-05	-0.732148	0.00408136	-0.918536	0.00391067	-0.246946	0.771091	translation
ENSMUSG00000067713	Prkag1	-0.467601	0.0858654	-0.283505	1	-0.751107	0.00163522	Ribo	Ribo exclusive	-0.780922	0.00277119	-0.31202	0.0595198	-1.05036	0.00239728	-0.660543	0.0204173	translation
ENSMUSG00000027624	Epb41l1	0.867076	0.0863152	0.672491	0.0882428	1.53957	0.000171355	Ribo	Ribo exclusive	1.55641	0.00175968	0.65068	0.00129629	1.53244	0.100096	0.645118	0.0342822	abundance
ENSMUSG00000010277	2610507B11Rik	0.871657	0.0866013	-0.175933	1	0.695724	0.192097	Unchanged		0.497153	0.160784	-0.266823	0.241065	0.614096	0.1573	-0.342404	0.231644	background
ENSMUSG00000029715	Pop7	-0.822927	0.0866461	0.523004	0.946407	-0.299923	1	Unchanged		-0.504057	0.305665	0.489038	0.00408136	-2.16436	0.00588246	0.57622	0.00639983	translation
ENSMUSG00000061603	Akap6	0.526246	0.0868621	-0.0627483	1	0.463497	0.416612	Unchanged		0.479872	0.0663974	-0.142472	0.37858	0.576204	0.0607425	-0.24285	0.238646	background
ENSMUSG00000029328	Hnrnpdl	-0.582623	0.0870909	-0.323646	1	-0.906269	0.000687422	Ribo	Ribo exclusive	-0.935509	0.00196565	-0.266352	0.206365	-1.02717	0.00616095	-0.486174	0.209836	translation
ENSMUSG00000036873	2410004B18Rik	-0.668237	0.0870909	-0.154849	1	-0.823086	0.0112797	Ribo	Ribo exclusive	-0.832485	0.00386527	-0.20594	0.223865	-0.951178	0.00818009	-0.390004	0.158449	translation
ENSMUSG00000053329	D10Jhu81e	-0.526085	0.0870909	-0.447017	0.704645	-0.973102	9.57748e-06	Ribo	Ribo exclusive	-1.01973	0.000393379	-0.528399	0.00752782	-0.814798	0.0248298	-0.252085	0.52676	translation
ENSMUSG00000020143	Dock2	1.5104	0.0878703	1.05063	0.17807	2.56103	1.46145e-05	Ribo	Ribo exclusive	2.21775	0.000266908	0.776202	0.069763	1.61881	0.00587133	-0.517279	0.463805	translation
ENSMUSG00000036054	Sugp2	0.57521	0.0878712	-0.129445	1	0.445765	0.605865	Unchanged		0.510021	0.0949758	-0.180254	0.218088	0.716259	0.0563071	-0.265624	0.14155	background
ENSMUSG00000029474	Rnf34	-0.489107	0.0881681	-0.381816	1	-0.870923	0.000178899	Ribo	Ribo exclusive	-0.892375	0.00120975	-0.391871	0.0162053	-0.771688	0.0335485	-0.280134	0.336701	translation
ENSMUSG00000022223	Sdr39u1	-0.613703	0.0882179	-0.463842	1	-1.07754	1.65363e-05	Ribo	Ribo exclusive	-1.05766	0.000749227	-0.407474	0.065756	-0.88831	0.0137911	-0.0588034	0.906786	translation
ENSMUSG00000008036	Ap2s1	-0.471531	0.0885089	0.109587	1	-0.361944	0.671002	Unchanged		-0.374162	0.0649332	0.030898	0.869232	-0.381112	0.097938	0.108868	0.674812	background
ENSMUSG00000026915	Strbp	0.786197	0.0887554	-0.561503	0.0581246	0.224695	1	Unchanged		0.0813778	0.833051	-0.562775	0.00133506	0.312559	0.714469	-0.566004	0.010318	buffering
ENSMUSG00000041757	Plekha6	0.697194	0.0887554	0.0381743	1	0.735369	0.0754924	Unchanged		0.731843	0.0114541	-0.114024	0.736677	0.750137	0.0250451	-0.296206	0.585097	translation
ENSMUSG00000037514	Pank2	0.881157	0.0887618	-0.109101	1	0.772056	0.247042	Unchanged		0.633787	0.0904465	-0.275815	0.271453	0.384008	0.336639	-0.053578	0.871054	background
ENSMUSG00000012076	Brms1l	-0.766275	0.0890492	-0.111391	1	-0.877666	0.0341418	Ribo	Ribo exclusive	-1.10633	0.0247706	-0.178959	0.216197	-1.02386	0.105949	-0.154057	0.441416	background
ENSMUSG00000028345	Tex10	0.856446	0.0892176	0.0256912	1	0.882138	0.130291	Unchanged		0.7088	0.109372	-0.153786	0.591584	0.869955	0.053085	-0.395509	0.189544	background
ENSMUSG00000054455	Vapb	-0.50107	0.089496	-0.0333035	1	-0.534374	0.108956	Unchanged		-0.53481	0.0299216	0.0201931	0.923303	-0.543058	0.0501521	0.155975	0.573898	background
ENSMUSG00000063870	Chd4	0.364385	0.090091	0.151998	1	0.516383	0.0936685	Unchanged		0.480198	0.0265131	0.0159598	0.951652	0.472481	0.0376291	-0.346152	0.235061	translation
ENSMUSG00000021733	Slc4a7	0.533323	0.0907033	-0.171437	1	0.361887	0.95693	Unchanged		0.359556	0.181448	-0.170951	0.236668	0.41251	0.227135	-0.192775	0.291883	background
ENSMUSG00000003559	As3mt	-0.421832	0.0908713	-0.504471	0.262907	-0.926303	1.66766e-06	Ribo	Ribo exclusive	-0.956072	0.000693081	-0.540153	0.000916973	-0.768664	0.122113	-0.466462	0.060828	abundance
ENSMUSG00000000148	Brat1	0.823564	0.091839	0.729983	0.146751	1.55355	7.54682e-06	Ribo	Ribo exclusive	1.6439	0.00179575	0.581644	0.016163	1.79056	0.0204838	0.66559	0.103903	translation
ENSMUSG00000027695	Pld1	0.81424	0.091839	-0.503387	0.541349	0.310853	1	Unchanged		0.152322	0.723612	-0.495998	0.0126824	0.306615	0.668974	-0.503071	0.0352322	buffering
ENSMUSG00000028643	Svbp	-0.808653	0.091839	0.406532	1	-0.402121	1	Unchanged		-0.338545	0.200119	0.369659	0.0553528	-0.270895	0.468073	0.339663	0.165319	background
ENSMUSG00000037275	Gemin5	0.510337	0.091839	0.231569	1	0.741906	0.012547	Ribo	Ribo exclusive	0.727116	0.00386527	0.138117	0.441263	0.712207	0.0152351	0.0854951	0.814117	translation
ENSMUSG00000062960	Kdr	0.872022	0.091839	-0.083668	1	0.788354	0.140961	Unchanged		0.614399	0.135224	-0.217618	0.475206	0.8477	0.0292037	-0.518042	0.0753708	translation
ENSMUSG00000033382	Trappc8	0.583025	0.0922018	-0.0949553	1	0.48807	0.468216	Unchanged		0.38586	0.216823	-0.322931	0.374435	0.543132	0.0987996	-0.577681	0.139196	background
ENSMUSG00000066406	Akap13	0.509957	0.0922018	0.0218152	1	0.531772	0.156151	Unchanged		0.525154	0.049409	-0.0775021	0.693992	0.611434	0.0189302	-0.350306	0.078524	translation
ENSMUSG00000063856	Gpx1	0.651694	0.0922802	0.561809	0.517844	1.2135	1.98291e-05	Ribo	Ribo exclusive	1.11242	0.001332	0.151505	0.83285	1.11085	0.00601319	0.0828305	0.95824	translation
ENSMUSG00000006386	Tek	0.773481	0.0922825	0.0919493	1	0.86543	0.0224746	Ribo	Ribo exclusive	0.817726	0.0375741	-0.0354479	0.891728	0.856724	0.0300293	-0.306106	0.259967	translation
ENSMUSG00000022488	Nckap1l	1.26069	0.0922825	1.27828	0.017509	2.53897	1.12103e-07	RNA+Ribo	concordant (fwd)	2.30296	0.000141571	0.965693	0.0437254	1.6347	0.00424016	-0.676517	0.397716	translation
ENSMUSG00000029634	Rnf6	-0.473287	0.0922825	-0.319768	1	-0.793055	0.00144934	Ribo	Ribo exclusive	-0.743035	0.00368228	-0.305576	0.0507398	-0.601433	0.0549055	-0.15683	0.560303	background
ENSMUSG00000030983	Bccip	-0.527885	0.0922825	-0.00142789	1	-0.529313	0.16877	Unchanged		-0.533936	0.028217	-0.287116	0.504532	-0.581833	0.0369196	-0.672066	0.288217	translation
ENSMUSG00000033955	Tnks1bp1	0.600271	0.0922825	0.363281	1	0.963552	0.000598274	Ribo	Ribo exclusive	0.98203	0.00136312	0.298752	0.115567	0.946444	0.0119724	0.236529	0.531964	translation
ENSMUSG00000035898	Uba6	0.711545	0.0922825	0.438435	0.99425	1.14998	0.00129979	Ribo	Ribo exclusive	1.05784	0.00230206	0.213212	0.535621	0.993551	0.0104616	-0.20038	0.761646	translation
ENSMUSG00000038188	Scarf1	0.874955	0.0922825	0.242087	1	1.11704	0.00671401	Ribo	Ribo exclusive	1.12584	0.0050694	0.203817	0.432993	1.08617	0.0217305	0.108149	0.82179	translation
ENSMUSG00000031201	Brcc3	-0.763838	0.0925692	-0.340128	1	-1.10397	0.00134362	Ribo	Ribo exclusive	-1.18425	0.0143812	-0.330193	0.0560585	-1.90051	0.00360976	-0.563819	0.0184866	translation
ENSMUSG00000025791	Pgm2	-0.349983	0.0931189	-0.162033	1	-0.512016	0.0463162	Ribo	Ribo exclusive	-0.539241	0.012401	-0.190531	0.13519	-0.405042	0.106777	-0.0638305	0.758706	background
ENSMUSG00000001918	Slc1a5	1.01097	0.0932762	0.3853	1	1.39627	0.000528103	Ribo	Ribo exclusive	1.36563	0.00378815	0.152679	0.701327	1.32721	0.0139195	-0.100416	0.892746	translation
ENSMUSG00000024474	Ik	-0.555647	0.0932762	-0.399291	1	-0.954938	0.000116744	Ribo	Ribo exclusive	-0.962476	0.00157754	-0.506207	0.0157464	-1.21058	0.00590905	-0.780471	0.0407197	translation
ENSMUSG00000028639	Ybx1	1.10178	0.0932762	-0.126628	1	0.97515	0.0849343	Unchanged		0.714487	0.147287	-0.294464	0.347409	0.584924	0.32559	-0.190145	0.646451	background
ENSMUSG00000031583	Wrn	1.07947	0.0934471	0.341901	1	1.42137	0.00456168	Ribo	Ribo exclusive	1.53427	0.0314418	0.302155	0.093531	0.79022	0.356502	0.141353	0.536471	background
ENSMUSG00000035674	Ndufa3	-0.765071	0.0936669	-0.432501	1	-1.19757	0.000353002	Ribo	Ribo exclusive	-1.21125	0.002615	-0.565424	0.0393301	-1.23954	0.0221526	-0.597762	0.214305	translation
ENSMUSG00000040297	Suco	0.699813	0.0937087	0.103621	1	0.803433	0.106022	Unchanged		0.580869	0.141609	-0.00853241	0.970954	0.576424	0.20223	0.0464127	0.871054	background
ENSMUSG00000022965	Ifngr2	-0.475412	0.093819	-0.0966314	1	-0.572043	0.0951671	Unchanged		-0.6096	0.0102223	-0.276263	0.320031	-0.645931	0.0220263	-0.453367	0.351834	translation
ENSMUSG00000028992	Nmnat1	-0.498113	0.093819	-0.463096	0.477445	-0.961209	5.12721e-05	Ribo	Ribo exclusive	-0.965489	0.000524021	-0.377067	0.090799	-0.824077	0.00827965	0.0938964	0.863545	translation
ENSMUSG00000028128	F3	-0.776638	0.0943092	0.0826481	1	-0.69399	0.171018	Unchanged		-0.859888	0.0511313	0.119314	0.642235	-0.894784	0.0828018	0.184427	0.602465	background
ENSMUSG00000032042	Srpr	0.479205	0.0943092	-0.0827763	1	0.396429	0.524783	Unchanged		0.407948	0.0801566	-0.112824	0.475206	0.415674	0.132287	-0.123895	0.571072	background
ENSMUSG00000044452	Zfp507	-0.614268	0.0953224	0.00186433	1	-0.612404	0.227893	Unchanged		-0.651407	0.0752397	-0.176379	0.506047	-0.473338	0.165325	0.115152	0.694757	background
ENSMUSG00000068391	Chrac1	-0.57085	0.0953224	-0.0694667	1	-0.640317	0.0826393	Unchanged		-0.679562	0.00373168	-0.20123	0.347734	-0.700602	0.0117159	-0.307822	0.468835	translation
ENSMUSG00000048175	Asb8	-0.43362	0.0957355	-0.153882	1	-0.587502	0.043681	Ribo	Ribo exclusive	-0.621646	0.0134842	-0.283146	0.158857	-0.695306	0.0267319	-0.413018	0.199033	translation
ENSMUSG00000020514	Mrpl22	-0.688815	0.0962283	-0.332567	1	-1.02138	0.000851434	Ribo	Ribo exclusive	-1.0235	0.00317067	-0.199	0.52232	-1.00914	0.0129011	-0.125103	0.841523	translation
ENSMUSG00000030879	Mrpl17	-0.658381	0.0966678	0.198877	1	-0.459504	0.43655	Unchanged		-0.524702	0.0702074	0.124079	0.447008	-0.560136	0.106926	0.158316	0.464569	background
ENSMUSG00000015340	Cybb	0.994566	0.0970522	1.15152	0.00345599	2.14608	3.54411e-08	RNA+Ribo	concordant (fwd)	2.0311	4.22448e-05	1.05499	0.00760203	1.42572	0.00539947	-0.34125	0.682655	translation
ENSMUSG00000022111	Uchl3	-0.869062	0.0978698	0.125536	1	-0.743525	0.147499	Unchanged		-0.658782	0.100767	-0.00442566	0.989377	-0.661233	0.137734	-0.14008	0.697995	background
ENSMUSG00000044308	Ubr3	0.627161	0.0978698	-0.245433	1	0.381728	1	Unchanged		0.447671	0.101951	-0.314255	0.140025	0.702937	0.0268631	-0.528302	0.038801	translation
ENSMUSG00000051579	Tceal8	-1.11768	0.0978698	0.450406	1	-0.667271	0.464223	Unchanged		-1.16102	0.125442	0.359362	0.14157	-1.97227	0.0221565	0.562682	0.0419928	translation
ENSMUSG00000022220	Adcy4	0.538827	0.0995902	-0.191034	1	0.347793	1	Unchanged		0.361243	0.132326	-0.23171	0.148081	0.402674	0.191	-0.257413	0.222411	background
ENSMUSG00000041949	Tango6	0.737786	0.0995902	0.0931107	1	0.830897	0.0557854	Unchanged		0.777937	0.0125828	-0.0677298	0.81637	0.792864	0.0274153	-0.211842	0.633819	translation
ENSMUSG00000033703	Fuk	0.901855	0.0996958	0.279966	1	1.18182	0.0105325	Ribo	Ribo exclusive	0.937987	0.0784368	0.172463	0.459981	0.999374	0.118545	0.219404	0.475952	background
ENSMUSG00000057123	Gja5	0.964689	0.0998463	0.691668	0.343125	1.65636	7.54968e-05	Ribo	Ribo exclusive	1.53667	0.000649334	0.60523	0.00847664	0.974239	0.0741641	0.21785	0.563284	abundance
ENSMUSG00000063889	Crem	-0.734337	0.0999086	-0.805649	0.0358186	-1.53999	1.33963e-07	RNA+Ribo	concordant (fwd)	-1.51357	5.6801e-05	-0.84143	0.000673004	-1.10867	0.0328024	-0.451208	0.345581	translation
ENSMUSG00000026319	Relch	0.485616	0.100518	0.0402585	1	0.525874	0.263045	Unchanged		0.48913	0.0532067	0.0791226	0.656308	0.482108	0.101344	0.0609765	0.820987	background
ENSMUSG00000068270	Shroom4	0.773154	0.100649	-0.414412	1	0.358742	1	Unchanged		0.0503719	0.933623	-0.557586	0.0249084	0.0967008	0.918329	-0.55821	0.0589056	background
ENSMUSG00000032198	Dock6	0.84729	0.101198	0.0441319	1	0.891422	0.0434274	Ribo	Ribo exclusive	0.957136	0.015758	-0.0658189	0.814819	0.959467	0.0367296	-0.0797454	0.860356	translation
ENSMUSG00000030793	Pycard	-0.893598	0.101598	0.426115	1	-0.467483	0.822867	Unchanged		-0.483064	0.126543	0.315953	0.278062	-0.587535	0.119924	0.446207	0.228074	background
ENSMUSG00000028465	Tln1	0.836969	0.101889	0.706236	0.386975	1.54321	9.83429e-06	Ribo	Ribo exclusive	1.38961	0.00154456	0.519189	0.194767	1.09103	0.0119942	-0.388441	0.537178	translation
ENSMUSG00000032777	Gtf3c1	0.451646	0.102011	-0.137597	1	0.314049	1	Unchanged		0.341431	0.152373	-0.206577	0.104483	0.310379	0.357712	-0.197951	0.218997	background
ENSMUSG00000014418	Hps5	0.775924	0.102191	0.247495	1	1.02342	0.0297027	Ribo	Ribo exclusive	0.942221	0.0109062	0.0539909	0.867323	0.936114	0.0287683	-0.0167621	0.974608	translation
ENSMUSG00000026283	Ing5	-0.756881	0.102191	0.00234957	1	-0.754531	0.137717	Unchanged		-0.962839	0.0408782	0.0688832	0.760116	-0.876246	0.0720209	-0.120438	0.663462	background
ENSMUSG00000035051	Dhx57	0.817512	0.102309	-0.0403667	1	0.777145	0.254511	Unchanged		0.642337	0.0310881	0.0383581	0.901457	0.645731	0.0609969	0.0921597	0.845008	background
ENSMUSG00000000326	Comt	-0.560978	0.10233	0.532572	0.4446	-0.0284057	1	Unchanged		-0.0322986	0.905214	0.429638	0.100047	-0.253492	0.349049	0.452801	0.0835568	background
ENSMUSG00000027834	Serpini1	1.01861	0.102898	0.0667281	1	1.08534	0.0558216	Unchanged		0.993198	0.0451746	0.00334365	0.991405	0.988398	0.035029	-0.28944	0.290957	translation
ENSMUSG00000073639	Rab18	-0.703448	0.102898	-0.247669	1	-0.951117	0.00316122	Ribo	Ribo exclusive	-1.07089	0.0076458	-0.244352	0.11947	-1.28326	0.0164557	-0.352516	0.130939	translation
ENSMUSG00000030714	Sgf29	-0.716877	0.10299	-0.162654	1	-0.879531	0.0200739	Ribo	Ribo exclusive	-0.948946	0.012127	-0.205022	0.161765	-0.984952	0.0466729	-0.222052	0.301497	translation
ENSMUSG00000039478	Micu3	0.902902	0.103063	-0.162906	1	0.739996	0.413312	Unchanged		0.639927	0.0973719	-0.142538	0.443176	0.808353	0.06164	-0.263923	0.226515	background
ENSMUSG00000029071	Dvl1	-0.506777	0.103168	-0.000300853	1	-0.507078	0.336345	Unchanged		-0.516175	0.0346173	-0.118801	0.538229	-0.520503	0.0690882	-0.130961	0.65771	background
ENSMUSG00000001018	Snapin	-0.574373	0.103364	-0.0934642	1	-0.667837	0.0615412	Unchanged		-0.693344	0.0102458	-0.283666	0.32125	-0.829756	0.00768269	-0.787793	0.0574429	translation
ENSMUSG00000027615	Hps3	0.801013	0.103364	0.202498	1	1.00351	0.0252158	Ribo	Ribo exclusive	0.953984	0.0272071	-0.0189803	0.962324	0.967082	0.0310672	-0.399653	0.351049	translation
ENSMUSG00000049504	Proser1	0.79624	0.103364	-0.194887	1	0.601353	0.417367	Unchanged		0.59663	0.0325375	-0.220207	0.40331	0.712895	0.0236919	-0.527418	0.124158	translation
ENSMUSG00000057130	Txnl4a	-0.565732	0.103364	0.124853	1	-0.440879	0.575496	Unchanged		-0.468318	0.0570783	-0.0650993	0.826575	-0.477	0.0916642	-0.15956	0.708399	background
ENSMUSG00000029407	Uso1	0.684823	0.103374	0.0751658	1	0.759988	0.0691309	Unchanged		0.746888	0.0113723	-0.143856	0.700461	0.824388	0.00629419	-0.88772	0.0428827	translation
ENSMUSG00000028854	Slc9a1	0.729185	0.103412	0.0433097	1	0.772495	0.0783182	Unchanged		0.722528	0.0233109	-0.144779	0.653031	0.663159	0.0555848	0.155997	0.741576	background
ENSMUSG00000045268	Zfp691	-0.610852	0.103412	-0.724681	0.0271647	-1.33553	8.47447e-07	RNA+Ribo	concordant (fwd)	-1.32957	0.0001922	-0.799831	0.000673004	-1.32615	0.0279492	-0.797524	0.0611353	translation
ENSMUSG00000020790	Ankfy1	0.636096	0.103592	0.382925	1	1.01902	0.000992186	Ribo	Ribo exclusive	0.907062	0.00981751	0.0316158	0.960555	0.890393	0.0027664	-1.29983	0.014487	translation
ENSMUSG00000025220	Mgea5	0.43732	0.103592	-0.0338527	1	0.403467	0.884635	Unchanged		0.405475	0.0949216	-0.0838582	0.603043	0.495854	0.0518014	-0.233837	0.185946	background
ENSMUSG00000061755	Bod1l	0.399086	0.103592	-0.288264	1	0.110821	1	Unchanged		0.0848776	0.680573	-0.353363	0.0355494	0.11431	0.68624	-0.359936	0.0753698	background
ENSMUSG00000021811	Dnajc9	-0.558884	0.103868	-0.0294257	1	-0.58831	0.247311	Unchanged		-0.597655	0.00945375	0.0946976	0.762069	-0.590553	0.0250522	-0.0338689	0.956382	translation
ENSMUSG00000024414	Mrpl27	-0.700283	0.10405	0.0500208	1	-0.650262	0.166306	Unchanged		-0.714644	0.0291157	0.0691734	0.751057	-0.777118	0.0268631	0.296148	0.251432	translation
ENSMUSG00000037210	Fam193a	0.55911	0.10405	-0.289828	1	0.269282	1	Unchanged		0.351948	0.237464	-0.310158	0.02781	0.623107	0.177622	-0.346504	0.0469862	buffering
ENSMUSG00000051344	Plekhm3	0.816031	0.10405	-0.0557747	1	0.760256	0.292508	Unchanged		0.68508	0.0967653	-0.177635	0.383888	0.801402	0.103242	-0.258515	0.319564	background
ENSMUSG00000052560	Cpne8	1.191	0.10405	-0.0190206	1	1.17198	0.0324143	Ribo	Ribo exclusive	1.19802	0.00767227	0.0110817	0.97418	1.18574	0.00526013	-0.572143	0.0916021	translation
ENSMUSG00000002147	Stat6	0.394104	0.105221	0.171534	1	0.565638	0.0327369	Ribo	Ribo exclusive	0.557995	0.0123489	-0.0599684	0.873519	0.558703	0.0292746	-0.088462	0.901796	translation
ENSMUSG00000032740	Ccdc88a	0.914257	0.105221	0.497729	0.964515	1.41199	0.00101075	Ribo	Ribo exclusive	1.19753	0.0339416	0.375466	0.095858	0.53812	0.375182	0.111849	0.684977	background
ENSMUSG00000028207	Asph	-0.46468	0.105431	0.0586608	1	-0.406019	0.608249	Unchanged		-0.427735	0.0848176	-0.0363623	0.840171	-0.418299	0.141566	0.0071543	0.977142	background
ENSMUSG00000028910	Mecr	-0.501842	0.105672	-0.289784	1	-0.791626	0.00243973	Ribo	Ribo exclusive	-0.78686	0.00100048	-0.42791	0.0713202	-0.656721	0.0119834	0.172802	0.761646	translation
ENSMUSG00000049658	Bdp1	0.609048	0.105672	-0.339562	1	0.269486	1	Unchanged		0.403989	0.344978	-0.442491	0.0202792	0.142712	0.849786	-0.412018	0.0700787	background
ENSMUSG00000006717	Acot13	-0.910103	0.105724	-0.454547	1	-1.36465	0.000260274	Ribo	Ribo exclusive	-1.52488	0.00535904	-0.551564	0.00817009	-0.438789	0.535293	-0.245957	0.317938	abundance
ENSMUSG00000072501	Phf20l1	0.61507	0.105724	-0.542546	0.415743	0.0725238	1	Unchanged		0.0996253	0.741252	-0.508527	0.0267605	0.329111	0.405147	-0.535066	0.044637	buffering
ENSMUSG00000028797	Tmem234	-0.566661	0.106124	0.117578	1	-0.449083	0.601531	Unchanged		-0.442205	0.0666701	-0.013909	0.965406	-0.440721	0.110425	0.0602079	0.894369	background
ENSMUSG00000043929	Klhl15	0.898237	0.106124	-0.228814	1	0.669423	0.450831	Unchanged		0.674585	0.0464845	-0.247964	0.13161	0.572266	0.19315	-0.199832	0.376965	background
ENSMUSG00000075602	Ly6a	0.614383	0.107703	-0.143319	1	0.471063	0.420738	Unchanged		0.482093	0.0568728	-0.380158	0.375981	0.537784	0.0701423	-0.637978	0.291725	background
ENSMUSG00000044477	Zfand3	-0.521064	0.108533	-0.0894455	1	-0.61051	0.0845133	Unchanged		-0.655794	0.00890226	-0.313659	0.339651	-0.723092	0.014374	-0.68805	0.207615	translation
ENSMUSG00000004934	Pias4	-0.640102	0.108638	0.242481	1	-0.39762	1	Unchanged		-0.418321	0.0426292	0.399826	0.23058	-0.433629	0.0769281	0.47681	0.384306	background
ENSMUSG00000005687	Bcas2	-0.570639	0.108638	-0.0840927	1	-0.654732	0.0807799	Unchanged		-0.731641	0.0133062	-0.034229	0.874458	-0.704319	0.0232082	0.230041	0.392865	translation
ENSMUSG00000023026	Dip2b	0.417945	0.108638	0.142942	1	0.560887	0.0519471	Unchanged		0.508635	0.0219676	-0.00789375	0.978853	0.512222	0.0292775	-0.422641	0.190421	translation
ENSMUSG00000031546	Gins4	-0.504626	0.108677	0.14789	1	-0.356735	1	Unchanged		-0.378106	0.0568472	0.25266	0.284112	-0.388056	0.097938	0.289823	0.436872	background
ENSMUSG00000030465	Psd3	0.62023	0.109465	-0.199368	1	0.420862	1	Unchanged		0.389858	0.374694	-0.194558	0.194896	0.211619	0.732943	-0.170275	0.347203	background
ENSMUSG00000042284	Itga1	0.692688	0.109852	0.321372	1	1.01406	0.00170686	Ribo	Ribo exclusive	0.946221	0.00552184	0.246647	0.248966	0.645467	0.0257481	-0.247841	0.292596	translation
ENSMUSG00000024889	Rce1	0.827761	0.109932	0.582848	0.38473	1.41061	0.000568898	Ribo	Ribo exclusive	1.31464	0.000327366	0.498826	0.00593114	0.987479	0.0443689	0.281432	0.376314	translation
ENSMUSG00000021003	Galc	0.694017	0.110146	0.113155	1	0.807172	0.0692274	Unchanged		0.755531	0.0148815	0.023355	0.910898	0.739488	0.0296998	-0.147451	0.590305	translation
ENSMUSG00000006356	Crip2	-0.488289	0.110473	-0.35496	1	-0.843249	0.00150864	Ribo	Ribo exclusive	-0.86105	0.00280635	-0.41634	0.0174013	-0.511001	0.134335	-0.141586	0.599734	abundance
ENSMUSG00000031519	Asb5	-0.981609	0.110473	0.892543	0.135567	-0.0890658	1	Unchanged		-0.239727	0.607655	0.875231	0.00660397	-0.707166	0.33675	0.919674	0.0187244	buffering
ENSMUSG00000040181	Fmo1	0.749179	0.110473	-0.289954	1	0.459225	0.737371	Unchanged		0.423622	0.160529	-0.590368	0.194471	0.532741	0.145543	-0.781982	0.178737	background
ENSMUSG00000073678	Pgap1	1.01495	0.110473	-0.0703962	1	0.944553	0.199097	Unchanged		1.167	0.0649332	-0.130138	0.416033	1.09675	0.154987	-0.107647	0.621234	background
ENSMUSG00000031485	Plpbp	-0.484219	0.110893	-0.347869	1	-0.832088	0.000783672	Ribo	Ribo exclusive	-0.873439	0.00114888	-0.293834	0.15921	-0.706469	0.0110779	0.253878	0.497756	translation
ENSMUSG00000029068	Ccnl2	0.594311	0.111006	-0.380052	1	0.214259	1	Unchanged		0.21933	0.362932	-0.3861	0.0744679	0.246838	0.442265	-0.400379	0.139595	background
ENSMUSG00000062590	Armc9	1.03454	0.111132	0.047471	1	1.08202	0.0550156	Unchanged		1.28921	0.0315937	0.082174	0.707442	1.21707	0.0731025	-0.0193396	0.952922	background
ENSMUSG00000002329	Mdp1	-0.621128	0.111214	0.398259	1	-0.222869	1	Unchanged		-0.210892	0.476467	0.18664	0.654998	-0.255572	0.441898	0.290876	0.537611	background
ENSMUSG00000014778	Fhod1	0.831692	0.111806	0.245577	1	1.07727	0.0154318	Ribo	Ribo exclusive	0.951254	0.00399015	0.117754	0.678991	0.917808	0.014374	-0.107746	0.836817	translation
ENSMUSG00000018995	Nars2	0.634551	0.112206	-0.350511	1	0.28404	1	Unchanged		0.22023	0.437744	-0.487475	0.0200237	-0.0229033	0.960238	-0.436386	0.0706884	background
ENSMUSG00000019846	Lama4	0.482458	0.112206	0.512706	0.323468	0.995165	3.30337e-06	Ribo	Ribo exclusive	0.956548	0.000296637	0.37044	0.130026	0.793556	0.00358311	-0.626288	0.208289	translation
ENSMUSG00000024516	Sec11c	0.759251	0.112917	0.210182	1	0.969434	0.0217456	Ribo	Ribo exclusive	0.954556	0.00365182	0.0886901	0.716005	0.932266	0.013352	-0.0564728	0.903193	translation
ENSMUSG00000031231	Cox7b	-0.653862	0.11293	-0.403468	1	-1.05733	0.00030141	Ribo	Ribo exclusive	-1.0555	0.00273731	-0.464816	0.00757013	-0.833004	0.115665	-0.370817	0.155287	abundance
ENSMUSG00000019899	Lama2	0.755588	0.113817	0.12857	1	0.884158	0.0296833	Ribo	Ribo exclusive	0.757818	0.0399835	0.00474297	0.987048	0.751509	0.0150971	-0.376224	0.0900778	translation
ENSMUSG00000040618	Pck2	0.740375	0.114268	0.642033	0.235761	1.38241	1.81258e-05	Ribo	Ribo exclusive	1.36915	0.000675112	0.461117	0.0973238	1.52906	0.00346133	0.792152	0.150679	translation
ENSMUSG00000014361	Mertk	0.820612	0.115307	-0.341164	1	0.479448	0.79325	Unchanged		0.487791	0.105808	-0.487449	0.132397	0.53937	0.162024	-0.549216	0.211452	background
ENSMUSG00000023170	Gps2	-0.567584	0.115307	-0.166339	1	-0.733923	0.0356855	Ribo	Ribo exclusive	-0.742371	0.00439836	-0.304996	0.181127	-0.606427	0.0312888	0.0791871	0.853924	translation
ENSMUSG00000031618	Nr3c2	0.843401	0.115307	-0.34079	1	0.502611	0.746059	Unchanged		0.377855	0.214353	-0.363646	0.166321	0.525426	0.152975	-0.476186	0.141202	background
ENSMUSG00000045482	Trrap	0.784735	0.115307	0.10587	1	0.890605	0.0445664	Ribo	Ribo exclusive	1.14335	0.0195032	0.0289097	0.873536	1.10403	0.0387013	-0.0892287	0.708399	translation
ENSMUSG00000031024	St5	0.899634	0.115528	0.59932	0.621078	1.49895	0.00015026	Ribo	Ribo exclusive	1.36615	0.000403937	0.312342	0.589325	1.3095	0.00264017	-0.608868	0.625107	translation
ENSMUSG00000038383	Pigu	0.821076	0.115528	-0.121186	1	0.69989	0.203424	Unchanged		0.787492	0.0548328	-0.289977	0.293665	0.920229	0.063485	-0.433057	0.237656	background
ENSMUSG00000025135	Anapc11	-0.54201	0.116288	0.179115	1	-0.362896	0.692812	Unchanged		-0.40216	0.0928297	0.0318778	0.899336	-0.389423	0.137	-0.133415	0.665953	background
ENSMUSG00000046982	Tshz1	-0.642044	0.116771	-0.0999971	1	-0.742041	0.0811051	Unchanged		-0.800255	0.0256883	-0.0760117	0.662523	-0.797261	0.0582168	-0.0710255	0.789263	background
ENSMUSG00000037960	Card19	-0.556059	0.119343	-0.390556	1	-0.946616	0.000444014	Ribo	Ribo exclusive	-0.978728	0.00209979	-0.689541	0.122128	-1.09053	0.0066819	-1.18774	0.16372	translation
ENSMUSG00000004085	Map3k20	-0.427631	0.119768	0.0534827	1	-0.374148	0.787784	Unchanged		-0.393189	0.0631754	-0.0745995	0.747603	-0.399078	0.101228	-0.12197	0.730244	background
ENSMUSG00000014551	Mrps25	-0.550083	0.119768	-0.364123	1	-0.914206	0.000589592	Ribo	Ribo exclusive	-0.916851	0.00335402	-0.520164	0.0333909	-1.22016	0.00438026	-0.922036	0.028517	translation
ENSMUSG00000019889	Ptprk	0.552353	0.119768	0.158248	1	0.710601	0.0522453	Unchanged		0.569409	0.084726	-0.0226638	0.941169	0.580959	0.107673	-0.192972	0.576924	background
ENSMUSG00000021392	Nol8	0.673294	0.119768	-0.0969048	1	0.576389	0.390033	Unchanged		0.441068	0.271408	-0.17759	0.287542	0.460438	0.368329	-0.183029	0.377983	background
ENSMUSG00000023942	Slc29a1	0.468756	0.119768	0.344633	1	0.81339	0.00106783	Ribo	Ribo exclusive	0.831291	0.00206191	0.331918	0.0282104	0.702253	0.0450297	0.224818	0.384306	translation
ENSMUSG00000029038	Ssu72	-0.493051	0.119768	0.187811	1	-0.30524	1	Unchanged		-0.340402	0.190209	0.126783	0.382478	-0.367476	0.246753	0.142158	0.436872	background
ENSMUSG00000031431	Tsc22d3	-0.682989	0.119768	-0.837534	0.0341588	-1.52052	8.71644e-09	RNA+Ribo	concordant (fwd)	-1.48775	8.24131e-05	-1.03439	0.0241248	-1.26832	0.00386402	-0.0068713	0.996319	translation
ENSMUSG00000063229	Ldha	-0.378582	0.119768	0.0986172	1	-0.279965	1	Unchanged		-0.316606	0.112163	-0.0521318	0.846638	-0.317275	0.164822	-0.0624924	0.879337	background
ENSMUSG00000064181	Rab3ip	-0.569678	0.119768	-0.142052	1	-0.71173	0.0459312	Ribo	Ribo exclusive	-0.684178	0.0195077	-0.380235	0.304146	-0.539052	0.078808	0.123572	0.826408	background
ENSMUSG00000020831	0610010K14Rik	-0.63451	0.120418	0.16825	1	-0.46626	0.823575	Unchanged		-0.432447	0.220098	0.16989	0.271158	-0.414653	0.362386	0.164469	0.397756	background
ENSMUSG00000023980	Taf8	-0.640917	0.120418	-2.91262e-05	1	-0.640946	0.195168	Unchanged		-0.766404	0.0137884	-0.00972166	0.955525	-0.755862	0.0260045	0.120292	0.555463	translation
ENSMUSG00000032462	Pik3cb	0.732718	0.120418	0.312948	1	1.04567	0.0121024	Ribo	Ribo exclusive	1.05335	0.00880498	0.0991086	0.779174	1.05595	0.0242687	0.118971	0.843979	translation
ENSMUSG00000043411	Usp48	0.471511	0.120418	-0.218715	1	0.252797	1	Unchanged		0.30041	0.169919	-0.342926	0.105244	0.383706	0.159263	-0.429233	0.124086	background
ENSMUSG00000054312	Mrps21	-0.638657	0.120418	-0.542292	0.591273	-1.18095	2.18903e-05	Ribo	Ribo exclusive	-1.20693	0.00188207	-0.586704	0.00192227	-1.19146	0.0823065	-0.581761	0.0438137	abundance
ENSMUSG00000020917	Acly	0.427388	0.120576	0.28152	1	0.708909	0.00373837	Ribo	Ribo exclusive	0.644849	0.00995286	0.213574	0.0906803	0.438747	0.151703	0.101983	0.580406	background
ENSMUSG00000024018	Ccdc167	-0.902243	0.120576	0.167781	1	-0.734461	0.339818	Unchanged		-0.5829	0.208869	0.240828	0.364199	-0.44403	0.425486	0.152806	0.65234	background
ENSMUSG00000034936	Arl4d	-0.743843	0.120576	-0.862414	0.0409492	-1.60626	9.86336e-08	RNA+Ribo	concordant (fwd)	-1.64699	3.88077e-05	-0.913724	0.00285582	-1.13871	0.00843624	0.117544	0.87218	translation
ENSMUSG00000038181	Chpf2	0.877904	0.120576	0.922817	0.0219761	1.80072	4.24495e-06	RNA+Ribo	concordant (fwd)	1.79662	0.00136172	0.658231	0.098326	1.53829	0.018863	0.205116	0.799243	translation
ENSMUSG00000037410	Tbc1d2b	0.580253	0.120582	0.740663	0.000766378	1.32092	1.74457e-05	RNA+Ribo	concordant (fwd)	1.37954	6.43274e-05	0.677761	0.000407802	1.60925	0.0109928	0.803252	0.0301522	translation
ENSMUSG00000041763	Tpp2	0.45601	0.120582	-0.265078	1	0.190932	1	Unchanged		0.19593	0.472374	-0.326767	0.0237991	0.126635	0.789388	-0.319608	0.0664367	background
ENSMUSG00000023020	Cox14	-0.591464	0.120799	-0.181084	1	-0.772548	0.041946	Ribo	Ribo exclusive	-0.828876	0.00509275	-0.115434	0.693009	-0.806921	0.016966	0.0706448	0.899656	translation
ENSMUSG00000001175	Calm1	-0.826742	0.121627	0.368114	1	-0.458628	0.915892	Unchanged		-0.612316	0.203854	0.100948	0.840311	-0.687398	0.115993	0.468758	0.290957	background
ENSMUSG00000036391	Sec24a	0.618802	0.12201	-0.454903	0.862793	0.163899	1	Unchanged		0.17469	0.583704	-0.46067	0.0214542	0.14895	0.775655	-0.457565	0.0574429	background
ENSMUSG00000036751	Cox6b1	-0.57084	0.122742	-0.303308	1	-0.874148	0.00239374	Ribo	Ribo exclusive	-0.867116	0.00365237	-0.417836	0.0736794	-0.80504	0.0298979	-0.313595	0.456842	translation
ENSMUSG00000095253	Zfp799	0.734153	0.122756	-0.427557	0.908286	0.306596	1	Unchanged		0.378459	0.246335	-0.352147	0.161091	0.65594	0.0693922	-0.516973	0.0643586	background
ENSMUSG00000041797	Abca9	0.667186	0.122844	0.659261	0.143452	1.32645	2.18903e-05	Ribo	Ribo exclusive	1.21067	0.000812554	0.679042	0.00433589	1.0505	0.0443689	0.547724	0.185267	translation
ENSMUSG00000006494	Pdk1	-0.535885	0.123382	0.185362	1	-0.350523	1	Unchanged		-0.353727	0.153543	0.0386887	0.897614	-0.363794	0.190865	0.164861	0.652076	background
ENSMUSG00000018160	Med1	0.473882	0.123382	-0.0769194	1	0.396962	0.593353	Unchanged		0.420736	0.119878	-0.310837	0.383342	0.481987	0.127731	-0.470363	0.312931	background
ENSMUSG00000021917	Spcs1	-0.709058	0.123382	0.037713	1	-0.671345	0.154213	Unchanged		-0.746186	0.0399536	-0.157256	0.588616	-0.668924	0.0951246	0.0502699	0.908408	background
ENSMUSG00000029911	Ssbp1	-0.668212	0.123548	-0.3324	1	-1.00061	0.000872936	Ribo	Ribo exclusive	-1.00488	0.00204963	-0.400959	0.0416568	-1.30302	0.00358311	-0.721427	0.0348688	translation
ENSMUSG00000026851	BC005624	-0.597372	0.123941	-0.136272	1	-0.733644	0.0458482	Ribo	Ribo exclusive	-0.712775	0.0109612	-0.188573	0.185287	-0.458402	0.112162	0.0124106	0.953388	background
ENSMUSG00000021725	Parp8	0.907143	0.124146	0.462862	0.977811	1.37001	0.00592025	Ribo	Ribo exclusive	0.970406	0.0385319	0.257732	0.447631	0.942008	0.0919497	0.208674	0.679637	background
ENSMUSG00000026965	Anapc2	0.418954	0.124224	0.253692	1	0.672646	0.00576973	Ribo	Ribo exclusive	0.686884	0.00250346	0.104961	0.680868	0.682085	0.00924388	0.0226977	0.97136	translation
ENSMUSG00000031520	Vegfc	1.04652	0.124224	1.00469	0.0304696	2.05121	2.79153e-05	RNA+Ribo	concordant (fwd)	1.91798	7.48653e-05	0.897952	0.00400759	1.61272	0.012077	0.507462	0.450813	translation
ENSMUSG00000029326	Enoph1	-0.672959	0.125603	0.416146	1	-0.256813	1	Unchanged		-0.258532	0.390097	0.378475	0.0501595	-0.14226	0.756436	0.35078	0.133098	background
ENSMUSG00000037916	Ndufv1	-0.399648	0.125792	-0.357617	1	-0.757266	0.000487953	Ribo	Ribo exclusive	-0.80063	0.00170619	-0.465835	0.0339065	-0.799059	0.0142378	-0.462366	0.304753	translation
ENSMUSG00000042109	Csdc2	-0.680337	0.127685	-1.33739	3.37911e-06	-2.01773	1.8742e-15	RNA+Ribo	concordant (fwd)	-2.12158	4.22448e-05	-1.19628	0.00303934	-1.76989	0.00839935	-0.571431	0.546051	translation
ENSMUSG00000046062	Ppp1r15b	0.749953	0.127685	0.0368928	1	0.786846	0.115882	Unchanged		0.941888	0.0174503	-0.212959	0.616789	0.957785	0.0389978	-0.291663	0.661692	translation
ENSMUSG00000027022	Xirp2	1.19331	0.127754	1.59884	0.00688443	2.79216	2.80756e-09	RNA+Ribo	concordant (fwd)	2.30534	0.00328625	1.41975	0.00202015	-0.226612	0.703739	0.336051	0.240538	abundance
ENSMUSG00000057469	E2f6	-0.685965	0.127864	-0.281877	1	-0.967842	0.00395035	Ribo	Ribo exclusive	-0.973548	0.0102458	-0.308419	0.0321444	-0.743154	0.181398	-0.246852	0.214305	abundance
ENSMUSG00000022565	Plec	0.925427	0.12842	0.0746183	1	1.00005	0.0312513	Ribo	Ribo exclusive	1.00997	0.0275781	-0.0368234	0.897308	1.0355	0.0413504	-0.227727	0.524136	translation
ENSMUSG00000026260	Ndufa10	-0.403318	0.12842	-0.513962	0.205568	-0.91728	6.95869e-07	Ribo	Ribo exclusive	-0.94272	0.000411717	-0.570757	0.00163692	-0.553598	0.103801	-0.225354	0.450813	abundance
ENSMUSG00000046574	Prr12	0.778046	0.12842	0.192495	1	0.970542	0.0134282	Ribo	Ribo exclusive	0.881096	0.00737747	-0.00443695	0.993124	0.881232	0.0204896	-0.0662743	0.940027	translation
ENSMUSG00000046727	Cystm1	-0.60454	0.12842	0.321693	1	-0.282847	1	Unchanged		-0.355426	0.155065	0.205325	0.383317	-0.447471	0.112635	0.356381	0.207428	background
ENSMUSG00000026825	Dnm1	0.762537	0.128637	0.609115	0.341435	1.37165	0.00030141	Ribo	Ribo exclusive	1.24552	0.000368833	0.636586	0.0192551	1.20732	0.00913137	0.565859	0.332781	translation
ENSMUSG00000033623	Pcgf3	-0.677099	0.128637	-0.0366864	1	-0.713785	0.175627	Unchanged		-0.795564	0.0627348	-0.0553355	0.746811	-0.692619	0.105965	0.0768382	0.707536	background
ENSMUSG00000062312	Erbb2	0.804412	0.128983	0.683944	0.154283	1.48836	0.000221607	Ribo	Ribo exclusive	1.50662	0.00434592	0.485449	0.122218	1.41067	0.0316216	0.372133	0.488671	translation
ENSMUSG00000040249	Lrp1	0.753148	0.130863	0.932192	0.0260301	1.68534	7.24481e-09	RNA+Ribo	concordant (fwd)	1.69652	0.000141589	0.779221	0.0234832	1.22774	0.00827965	-0.238966	0.733045	translation
ENSMUSG00000042323	Pbrm1	0.50169	0.130863	-0.107226	1	0.394464	0.559569	Unchanged		0.324551	0.257273	-0.159786	0.27641	0.194493	0.59124	-0.113981	0.527138	background
ENSMUSG00000033499	Larp4b	0.402922	0.13094	-0.289452	1	0.11347	1	Unchanged		0.111357	0.6258	-0.324175	0.0116424	0.155665	0.71844	-0.326604	0.0352322	buffering
ENSMUSG00000048732	Klhl11	0.815005	0.13094	0.0492823	1	0.864287	0.159749	Unchanged		0.979552	0.0545498	-0.102346	0.671749	1.09617	0.0489959	-0.279445	0.329936	translation
ENSMUSG00000005150	Wdr83	-0.525105	0.131612	-0.0410724	1	-0.566177	0.182713	Unchanged		-0.604552	0.019222	-0.0901828	0.563319	-0.633547	0.0361042	-0.148724	0.513171	translation
ENSMUSG00000026219	Trip12	0.546296	0.131612	-0.101287	1	0.445009	0.660919	Unchanged		0.358705	0.267701	-0.215985	0.348021	0.524303	0.134607	-0.338231	0.183347	background
ENSMUSG00000009293	Ube2g2	-0.47212	0.13177	-0.117288	1	-0.589409	0.0692284	Unchanged		-0.576097	0.0224348	-0.132553	0.383317	-0.47477	0.0884327	0.00531168	0.981739	background
ENSMUSG00000015843	Rxrg	-0.638831	0.132049	-0.57231	0.548217	-1.21114	2.24511e-05	Ribo	Ribo exclusive	-1.25607	0.000413433	-0.6888	0.0155546	-1.24554	0.00965121	-0.670379	0.259225	translation
ENSMUSG00000022450	Ndufa6	-0.518116	0.132049	-0.466588	0.69137	-0.984704	3.59024e-05	Ribo	Ribo exclusive	-0.973627	0.00152836	-0.530953	0.00332011	-0.792389	0.0933778	-0.43374	0.126266	abundance
ENSMUSG00000024070	Prkd3	0.690684	0.132049	0.373531	1	1.06421	0.00736194	Ribo	Ribo exclusive	0.932331	0.0246846	0.0814652	0.867622	0.913774	0.0524995	-0.160071	0.824902	background
ENSMUSG00000045128	Rpl18a	-1.54492	0.132049	0.137415	1	-1.4075	0.0417684	Ribo	Ribo exclusive	-1.479	0.0810113	0.189615	0.558723	-1.43389	0.154429	0.151203	0.744369	background
ENSMUSG00000047539	Fbxo28	-0.444341	0.132049	0.0388938	1	-0.405448	0.675419	Unchanged		-0.403485	0.0546058	-0.0906496	0.64607	-0.394717	0.10227	-0.0476879	0.883263	background
ENSMUSG00000042363	Lgalsl	0.650641	0.132286	-0.0417963	1	0.608844	0.382636	Unchanged		0.505266	0.12928	-0.110133	0.554987	0.542821	0.167462	-0.148129	0.534606	background
ENSMUSG00000042505	Sdhaf3	-0.712383	0.132286	-0.0609502	1	-0.773334	0.0765413	Unchanged		-0.662048	0.0321817	-0.0390693	0.876647	-0.67019	0.0598943	-0.112859	0.758873	background
ENSMUSG00000055932	Fto	0.41555	0.132286	-0.297525	1	0.118024	1	Unchanged		0.102187	0.6472	-0.327509	0.0299222	0.458048	0.0701423	-0.375836	0.0253717	buffering
ENSMUSG00000061315	Naca	0.596044	0.132286	-0.626685	0.228607	-0.0306416	1	Unchanged		-0.0147481	0.954812	-0.683233	0.0110213	0.23647	0.473652	-0.675694	0.0271104	buffering
ENSMUSG00000004035	Gstm7	-0.79775	0.132535	-0.721004	0.297176	-1.51875	3.26384e-06	Ribo	Ribo exclusive	-1.59789	0.00150558	-0.811649	0.00137785	-1.89688	0.0349829	-0.918955	0.0271753	translation
ENSMUSG00000032902	Slc16a1	-0.428985	0.133875	-0.129171	1	-0.558155	0.0834498	Unchanged		-0.60109	0.0148511	-0.216981	0.215692	-0.436817	0.091484	0.0474647	0.862347	background
ENSMUSG00000020899	Pfas	0.854954	0.134674	-0.0967735	1	0.758181	0.289559	Unchanged		0.745935	0.0590783	-0.140096	0.547162	0.942104	0.0139319	-0.422873	0.0734046	translation
ENSMUSG00000026615	Eprs	0.409221	0.13517	-0.410504	0.803438	-0.00128307	1	Unchanged		-0.0484946	0.84867	-0.474349	0.00869417	0.20104	0.567299	-0.460831	0.0281312	buffering
ENSMUSG00000031783	Polr2c	-1.01077	0.13552	-0.279552	1	-1.29032	0.000992927	Ribo	Ribo exclusive	-1.27254	0.00268526	-0.116733	0.745377	-1.27427	0.0103076	-0.13148	0.849174	translation
ENSMUSG00000031448	Adprhl1	-0.521306	0.135621	-0.161115	1	-0.682421	0.0313022	Ribo	Ribo exclusive	-0.708429	0.0114803	-0.25329	0.202973	-0.47165	0.0764327	0.122021	0.633266	background
ENSMUSG00000022684	Bfar	-0.423448	0.135656	-0.373576	1	-0.797024	0.000779146	Ribo	Ribo exclusive	-0.756518	0.00163382	-0.489304	0.0203176	-0.638474	0.0279196	-0.227302	0.60957	translation
ENSMUSG00000026883	Dab2ip	0.464826	0.135656	0.170875	1	0.635701	0.0443703	Ribo	Ribo exclusive	0.608189	0.0165282	0.154553	0.277752	0.537887	0.0724818	0.0820914	0.715558	background
ENSMUSG00000078656	Vps25	-0.368316	0.136701	-0.13237	1	-0.500686	0.146338	Unchanged		-0.527144	0.0105764	-0.0551502	0.806187	-0.520625	0.0267319	0.0719594	0.87218	translation
ENSMUSG00000027984	Hadh	-0.66124	0.137403	-0.747101	0.170335	-1.40834	1.85618e-06	Ribo	Ribo exclusive	-1.49407	0.000296637	-0.857098	0.00430659	-0.843027	0.0605707	-0.105488	0.842775	abundance
ENSMUSG00000020564	Atxn7l1	0.655892	0.138658	-0.474939	0.835005	0.180954	1	Unchanged		0.0847624	0.755028	-0.513953	0.0154535	-0.19447	0.597691	-0.485164	0.0402064	buffering
ENSMUSG00000031774	Fam192a	-0.614666	0.138696	-0.0457171	1	-0.660383	0.117778	Unchanged		-0.808124	0.0596584	-0.159767	0.381107	-0.857852	0.102391	-0.191144	0.434617	background
ENSMUSG00000039108	Lsm14b	-0.366986	0.138772	-0.400805	0.964515	-0.767791	0.000165485	Ribo	Ribo exclusive	-0.805606	0.00163308	-0.502779	0.00385712	-0.916043	0.0206402	-0.58937	0.0531322	translation
ENSMUSG00000061032	Rrp1	-0.372926	0.138772	-0.104667	1	-0.477594	0.181409	Unchanged		-0.496211	0.0195145	-0.320384	0.318328	-0.53113	0.0333981	-0.551805	0.319378	translation
ENSMUSG00000039005	Tlr4	0.789394	0.138835	0.0524354	1	0.84183	0.160229	Unchanged		0.739071	0.0573726	-0.104481	0.781863	0.816516	0.0319487	-0.521617	0.171571	translation
ENSMUSG00000041939	Mvk	-0.67831	0.138835	0.480653	0.796743	-0.197657	1	Unchanged		-0.246693	0.440993	0.578883	0.0298652	-0.525974	0.217359	0.653711	0.0390655	buffering
ENSMUSG00000062797	Hikeshi	0.745952	0.140181	0.0360027	1	0.781955	0.0925865	Unchanged		0.751904	0.0377567	-0.0992686	0.67481	0.762026	0.0720845	-0.125327	0.719227	background
ENSMUSG00000025102	3110040N11Rik	-0.698644	0.14035	0.199161	1	-0.499483	0.583419	Unchanged		-0.536143	0.0775556	0.140681	0.497907	-0.466116	0.178413	0.0369887	0.903831	background
ENSMUSG00000003072	Atp5d	-0.557274	0.140506	-0.286655	1	-0.843929	0.00454845	Ribo	Ribo exclusive	-0.893739	0.00290721	-0.303737	0.103531	-0.555722	0.039289	0.165051	0.485812	translation
ENSMUSG00000023967	Mrps18a	-0.420561	0.140506	-0.113128	1	-0.533689	0.138223	Unchanged		-0.534592	0.0241023	-0.225824	0.197309	-0.439448	0.109818	-0.0844815	0.769609	background
ENSMUSG00000029571	Tmem106b	-0.524241	0.140506	-0.585222	0.307412	-1.10946	2.47471e-05	Ribo	Ribo exclusive	-1.14201	0.000642134	-0.666906	0.0180748	-1.18217	0.00927165	-0.740095	0.197901	translation
ENSMUSG00000038058	Nod1	0.706683	0.140506	0.340741	1	1.04742	0.00697457	Ribo	Ribo exclusive	0.956894	0.00479244	0.109869	0.808815	0.991752	0.00904449	0.711386	0.284513	translation
ENSMUSG00000038260	Trpm4	0.853826	0.140581	-0.206705	1	0.647122	0.395201	Unchanged		0.743368	0.0416301	-0.390724	0.232598	0.530039	0.18343	-0.0685404	0.887028	background
ENSMUSG00000032812	Arap1	0.72503	0.141049	0.722445	0.156598	1.44748	8.42498e-06	Ribo	Ribo exclusive	1.47669	0.00067464	0.384366	0.497802	1.41304	0.00459238	-0.229429	0.858472	translation
ENSMUSG00000043962	Thrap3	0.594604	0.141049	-0.397846	1	0.196758	1	Unchanged		0.181698	0.561618	-0.396011	0.0207987	0.528788	0.233646	-0.429406	0.034622	buffering
ENSMUSG00000001729	Akt1	-0.37557	0.141065	0.20454	1	-0.17103	1	Unchanged		-0.198709	0.297514	0.0318498	0.915572	-0.195771	0.369308	-0.0413942	0.918644	background
ENSMUSG00000057411	Fam173a	-0.584663	0.141296	0.154404	1	-0.430259	0.695818	Unchanged		-0.481182	0.0522248	0.104346	0.412657	-0.493247	0.102683	0.112569	0.510987	background
ENSMUSG00000036553	Sh3tc1	0.749289	0.143567	0.212166	1	0.961455	0.0426091	Ribo	Ribo exclusive	0.948305	0.00949766	0.0003977	0.999337	0.948437	0.0201376	0.350733	0.538502	translation
ENSMUSG00000022141	Nipbl	0.694758	0.143997	-0.381566	1	0.313192	1	Unchanged		0.237618	0.562949	-0.465102	0.0254504	0.387832	0.538351	-0.479687	0.0561496	background
ENSMUSG00000024456	Diaph1	0.462205	0.143997	-0.046123	1	0.416082	0.523856	Unchanged		0.396833	0.119091	-0.187506	0.398761	0.553783	0.0302524	-0.447187	0.05102	translation
ENSMUSG00000035245	Eogt	0.622298	0.143997	-0.134471	1	0.487827	1	Unchanged		0.360543	0.343007	-0.127615	0.368957	0.199512	0.678383	-0.0939408	0.587353	background
ENSMUSG00000031447	Lamp1	-0.343409	0.144209	0.220528	1	-0.122882	1	Unchanged		-0.153998	0.435708	0.140099	0.353344	-0.288733	0.133719	0.248165	0.0868564	background
ENSMUSG00000039997	Ifi203	1.19442	0.144295	0.464487	1	1.65891	0.00799195	Ribo	Ribo exclusive	1.16937	0.0654866	0.327422	0.315553	0.636572	0.224119	-0.0868307	0.798268	background
ENSMUSG00000031703	Itfg1	0.440292	0.144413	-0.0654028	1	0.374889	0.661478	Unchanged		0.321228	0.169542	-0.138807	0.364112	0.179038	0.484973	-0.0220082	0.909923	background
ENSMUSG00000036918	Ttc7	-0.614556	0.144413	0.492219	0.660039	-0.122337	1	Unchanged		-0.163524	0.56932	0.313775	0.252431	-0.0670019	0.85777	0.262833	0.413044	background
ENSMUSG00000066151	Fkbp15	0.496999	0.144413	0.156971	1	0.65397	0.0579763	Unchanged		0.765146	0.0143868	0.00328117	0.991405	0.763974	0.0298979	-0.171043	0.657404	translation
ENSMUSG00000028048	Gba	0.622929	0.145422	0.626549	0.180958	1.24948	4.57176e-05	Ribo	Ribo exclusive	1.17589	0.000301854	0.405021	0.222154	1.01015	0.00278442	-0.630331	0.333815	translation
ENSMUSG00000034842	Art3	-0.514748	0.145422	-0.916912	0.00267121	-1.43166	4.57499e-10	RNA+Ribo	concordant (fwd)	-1.4681	8.7126e-05	-0.949207	0.000803043	-0.950322	0.0491665	-0.37041	0.474723	translation
ENSMUSG00000056492	Adgrf5	0.66818	0.145483	-0.800802	0.114162	-0.132623	1	Unchanged		-0.233106	0.528412	-0.96764	0.00599281	0.361786	0.501845	-0.865931	0.0227379	buffering
ENSMUSG00000014355	Anapc1	0.607616	0.145636	0.054703	1	0.662319	0.0853112	Unchanged		0.526963	0.1592	-0.01004	0.955525	0.523946	0.229909	0.00479973	0.982048	background
ENSMUSG00000004843	Chmp2b	-0.405816	0.14579	-0.0625556	1	-0.468372	0.30342	Unchanged		-0.464786	0.0332809	-0.0304042	0.877666	-0.463975	0.0641206	-0.0197182	0.951439	background
ENSMUSG00000009995	Taz	-0.456576	0.14579	-0.127805	1	-0.584382	0.12517	Unchanged		-0.537402	0.0357937	-0.201716	0.203824	-0.472563	0.130236	-0.142296	0.538502	background
ENSMUSG00000027309	4930402H24Rik	0.390522	0.14579	-0.137871	1	0.252651	1	Unchanged		0.213301	0.315626	-0.269042	0.206663	0.283039	0.256843	-0.347796	0.185858	background
ENSMUSG00000037286	Stag1	0.707422	0.14579	0.0889015	1	0.796324	0.0828802	Unchanged		0.639316	0.153171	-0.265627	0.65079	0.753368	0.106592	-0.659632	0.296932	background
ENSMUSG00000030612	Mrpl46	-0.458808	0.145973	-0.347304	1	-0.806112	0.00119783	Ribo	Ribo exclusive	-0.835421	0.00315142	-0.411449	0.00619579	-0.373566	0.356996	-0.229307	0.24883	abundance
ENSMUSG00000051323	Pcdh19	0.619785	0.145973	0.445038	0.852759	1.06482	0.00284312	Ribo	Ribo exclusive	1.21421	0.00386352	0.395093	0.0122657	0.666547	0.272449	0.24727	0.243093	abundance
ENSMUSG00000022100	Xpo7	0.436206	0.145988	0.0192955	1	0.455502	0.452579	Unchanged		0.441892	0.0657704	-0.107886	0.619104	0.469969	0.0895969	-0.20577	0.485455	background
ENSMUSG00000020441	2310033P09Rik	-0.676782	0.146696	0.120413	1	-0.556369	0.660092	Unchanged		-0.630783	0.0724214	0.1283	0.576743	-0.641511	0.122136	0.146349	0.64813	background
ENSMUSG00000020092	Pald1	0.670734	0.147884	0.31637	1	0.987104	0.00571529	Ribo	Ribo exclusive	1.04263	0.00263093	0.0238957	0.961837	1.03794	0.00865522	-0.390418	0.621179	translation
ENSMUSG00000022204	Ngdn	-0.415062	0.148054	0.0765829	1	-0.338479	1	Unchanged		-0.341591	0.143787	0.0332251	0.816331	-0.321238	0.225992	-0.00976509	0.958946	background
ENSMUSG00000030516	Tjp1	0.519936	0.148054	-0.0139088	1	0.506027	0.374547	Unchanged		0.465825	0.133214	-0.0741745	0.659875	0.542738	0.109499	-0.164614	0.396929	background
ENSMUSG00000027405	Nop56	0.690431	0.148911	0.117299	1	0.80773	0.0507876	Unchanged		0.739866	0.0164196	0.0808545	0.723401	0.689275	0.0367949	-0.153116	0.632417	translation
ENSMUSG00000036376	Abt1	-0.566538	0.148911	-0.08257	1	-0.649108	0.184272	Unchanged		-0.712962	0.0089688	-0.142051	0.388033	-0.728126	0.0260045	-0.169125	0.524328	translation
ENSMUSG00000050668	Gpatch11	-0.507361	0.148911	-0.164443	1	-0.671805	0.0531678	Unchanged		-0.771872	0.0148194	-0.0938167	0.685238	-0.833274	0.0178393	-0.343619	0.264667	translation
ENSMUSG00000021798	Ldb3	-0.336236	0.148987	-0.183688	1	-0.519924	0.0626751	Unchanged		-0.532357	0.00990462	-0.278101	0.131645	-0.497229	0.0404886	-0.173939	0.632636	translation
ENSMUSG00000060261	Gtf2i	0.332194	0.149463	-0.288534	1	0.0436603	1	Unchanged		0.00103345	0.996566	-0.425725	0.0525928	0.0287385	0.928158	-0.425819	0.102025	background
ENSMUSG00000022972	Cfap298	-0.516066	0.149572	-0.245717	1	-0.761783	0.0133895	Ribo	Ribo exclusive	-0.72345	0.00771894	-0.362301	0.0640236	-0.63231	0.0624916	-0.250517	0.439185	background
ENSMUSG00000016554	Eif3d	-0.3664	0.14972	0.0451776	1	-0.321223	1	Unchanged		-0.354779	0.0973719	0.00847409	0.95484	-0.366138	0.0975093	0.11554	0.431016	background
ENSMUSG00000021754	Map3k1	0.63697	0.150109	0.197928	1	0.834898	0.0280756	Ribo	Ribo exclusive	0.767354	0.0144201	0.190106	0.327146	0.819877	0.030866	0.266982	0.364238	translation
ENSMUSG00000027822	Slc33a1	0.638974	0.150109	0.273252	1	0.912226	0.0297803	Ribo	Ribo exclusive	0.840234	0.0125828	0.0626151	0.854289	0.803057	0.019669	-0.417124	0.312931	translation
ENSMUSG00000043008	Klhl6	1.02273	0.150109	1.01866	0.0332629	2.04138	1.98011e-05	RNA+Ribo	concordant (fwd)	2.12524	0.0034547	0.911909	0.0076942	1.73051	0.106267	0.736756	0.157888	abundance
ENSMUSG00000012017	Scarf2	1.12625	0.150665	1.38063	0.00179657	2.50688	3.55978e-07	RNA+Ribo	concordant (fwd)	2.62866	3.02219e-05	1.10221	0.0163806	2.5254	0.00196292	0.83945	0.498953	translation
ENSMUSG00000014444	Piezo1	0.780982	0.150751	0.685087	0.368566	1.46607	2.79153e-05	Ribo	Ribo exclusive	1.3886	0.00286611	0.497853	0.110233	0.961274	0.0352505	-0.12899	0.793766	translation
ENSMUSG00000022283	Pabpc1	0.906694	0.151013	0.435608	1	1.3423	0.00147804	Ribo	Ribo exclusive	1.20536	0.00593154	0.0170972	0.982504	1.19787	0.00561237	-1.28092	0.109109	translation
ENSMUSG00000026281	Dtymk	-0.58445	0.151013	0.496678	0.713865	-0.0877714	1	Unchanged		-0.138715	0.585587	0.599021	0.034487	-0.189637	0.593608	0.61637	0.0714596	background
ENSMUSG00000033769	Exoc6b	0.535503	0.151361	-0.150721	1	0.384781	0.911837	Unchanged		0.366078	0.210989	-0.125666	0.520589	0.337216	0.333932	-0.0951884	0.717254	background
ENSMUSG00000022048	Dpysl2	0.541371	0.15146	0.575539	0.290782	1.11691	6.4734e-06	Ribo	Ribo exclusive	1.12642	0.000224041	0.475493	0.039045	1.1636	0.00325402	0.576947	0.304753	translation
ENSMUSG00000039765	Cc2d2a	0.766192	0.15146	0.0337388	1	0.799931	0.14245	Unchanged		0.677417	0.0137686	-0.0118572	0.960555	0.685374	0.0208	-0.276356	0.323766	translation
ENSMUSG00000079562	Maea	-0.35957	0.15146	0.206655	1	-0.152915	1	Unchanged		-0.17083	0.338243	-0.0289247	0.941842	-0.172324	0.39584	-0.124228	0.809731	background
ENSMUSG00000021703	Serinc5	0.621322	0.151566	0.27391	1	0.895231	0.0112797	Ribo	Ribo exclusive	0.832227	0.00377831	0.11669	0.61402	0.763099	0.012077	-0.279288	0.424889	translation
ENSMUSG00000002602	Axl	0.639701	0.152441	0.5471	0.621078	1.1868	0.000140723	Ribo	Ribo exclusive	1.23363	0.00169933	0.405841	0.111701	1.08876	0.0193851	0.167758	0.741576	translation
ENSMUSG00000035933	Cog5	0.42996	0.152441	-0.162428	1	0.267532	1	Unchanged		0.263378	0.208919	-0.218098	0.217674	0.416377	0.0675862	-0.381501	0.056552	background
ENSMUSG00000022216	Psme1	-0.551257	0.153102	-0.532377	0.47977	-1.08363	2.79153e-05	Ribo	Ribo exclusive	-1.1276	0.00051305	-0.599187	0.00484706	-0.983742	0.0303843	-0.462309	0.235988	translation
ENSMUSG00000024146	Cript	0.656002	0.153123	0.241565	1	0.897567	0.0106915	Ribo	Ribo exclusive	0.850209	0.0059887	0.162075	0.360175	0.714217	0.0305602	-0.0680642	0.815147	translation
ENSMUSG00000039458	Mtmr12	1.05844	0.153136	0.149404	1	1.20785	0.0279747	Ribo	Ribo exclusive	0.934201	0.076696	-0.000635935	0.998849	0.935065	0.0611691	-0.27882	0.345991	background
ENSMUSG00000034341	Wbp2	-0.427875	0.15331	-0.0874283	1	-0.515303	0.178698	Unchanged		-0.530482	0.014563	-0.0943285	0.59349	-0.496271	0.0397475	0.0728591	0.813046	translation
ENSMUSG00000029610	Aimp2	-0.647053	0.153487	0.13904	1	-0.508013	0.412598	Unchanged		-0.544355	0.153291	0.095041	0.55565	-0.81089	0.00705028	0.251736	0.071622	translation
ENSMUSG00000041278	Ttc1	-0.507084	0.154827	0.0486516	1	-0.458432	0.626734	Unchanged		-0.537163	0.0958557	-0.00657993	0.968191	-0.531567	0.143865	0.0389963	0.843367	background
ENSMUSG00000021745	Ptprg	0.544512	0.155815	-0.0311884	1	0.513323	0.388329	Unchanged		0.491071	0.140482	-0.0930783	0.506878	0.608615	0.11283	-0.148084	0.376075	background
ENSMUSG00000029387	Gtf2h3	-0.579313	0.155815	0.265518	1	-0.313795	1	Unchanged		-0.358157	0.210091	0.12763	0.553867	-0.489397	0.0705972	0.308111	0.132921	background
ENSMUSG00000034947	Tmem106a	1.2865	0.155815	0.733282	0.813065	2.01978	0.000608303	Ribo	Ribo exclusive	2.05733	0.00496948	0.683042	0.0641334	1.72879	0.0607653	0.430187	0.470666	background
ENSMUSG00000037936	Scarb1	0.655103	0.155815	0.727286	0.0742628	1.38239	4.43303e-06	Ribo	Ribo exclusive	1.3352	0.000604114	0.678839	0.00276503	1.17042	0.0479723	0.574046	0.137828	translation
ENSMUSG00000072258	Taf1a	-0.677607	0.156004	-0.281655	1	-0.959262	0.0079104	Ribo	Ribo exclusive	-0.987879	0.0228938	-0.215474	0.344063	-0.925342	0.074566	-0.149008	0.667237	background
ENSMUSG00000020231	Dip2a	0.634877	0.156248	0.308954	1	0.943831	0.015816	Ribo	Ribo exclusive	0.978867	0.0101539	0.227711	0.220432	0.862396	0.0570861	0.122123	0.682232	background
ENSMUSG00000024909	Efemp2	0.854505	0.156411	1.35767	0.000174958	2.21218	1.93681e-09	RNA+Ribo	concordant (fwd)	2.06255	0.00022223	1.27693	0.00015329	0.138876	0.872175	0.55195	0.115641	abundance
ENSMUSG00000033943	Mga	0.681936	0.157707	-0.33463	1	0.347306	1	Unchanged		0.17819	0.667855	-0.364339	0.0479641	-0.481048	0.268022	-0.316504	0.0786574	background
ENSMUSG00000027583	Zbtb46	0.727982	0.15784	0.219864	1	0.947847	0.0561423	Unchanged		1.08543	0.0295092	0.204462	0.302497	0.970839	0.105965	0.132249	0.649049	background
ENSMUSG00000027227	Sord	0.837184	0.158193	-0.32867	1	0.508514	0.816021	Unchanged		0.37071	0.328736	-0.326878	0.206667	0.687046	0.0809511	-0.475805	0.0782855	background
ENSMUSG00000040723	Rcsd1	-0.437	0.158193	-0.107777	1	-0.544777	0.164346	Unchanged		-0.547331	0.0212312	-0.110215	0.51834	-0.459049	0.0619193	0.123568	0.58757	background
ENSMUSG00000046722	Cdc42se1	-0.74377	0.158193	0.585176	0.592896	-0.158593	1	Unchanged		-0.202877	0.545429	0.728431	0.0467614	-0.188811	0.700436	0.723669	0.102386	background
ENSMUSG00000006398	Cdc20	2.65766	0.158641	2.16093	0.00384737	4.81859	1.38115e-05	RNA+Ribo	concordant (fwd)	3.33558	0.00222297	1.88683	0.00746337	2.9461	0.0653957	1.61546	0.156388	abundance
ENSMUSG00000025558	Dock9	0.834372	0.158641	-0.183193	1	0.651179	0.371416	Unchanged		0.638937	0.159638	-0.265899	0.273675	0.912128	0.0764327	-0.413919	0.140374	background
ENSMUSG00000021819	Zswim8	0.679583	0.159927	0.0942559	1	0.773838	0.0820583	Unchanged		0.968638	0.0201457	-0.0504483	0.850253	0.993248	0.0359362	-0.196049	0.591774	translation
ENSMUSG00000028556	Dock7	0.559302	0.159955	0.533193	0.309008	1.0925	0.000403201	Ribo	Ribo exclusive	1.04293	0.00158274	0.368463	0.174866	0.781431	0.0119292	-0.378895	0.328578	translation
ENSMUSG00000025024	Smndc1	-0.739798	0.160296	-0.270064	1	-1.00986	0.0163658	Ribo	Ribo exclusive	-1.10903	0.00754546	-0.271214	0.201572	-1.29197	0.0129011	-0.459785	0.155869	translation
ENSMUSG00000070047	Fat1	1.01342	0.160296	1.45736	0.00196649	2.47078	2.68971e-10	RNA+Ribo	concordant (fwd)	2.30277	0.000182323	1.23053	0.0121286	1.23619	0.0135071	-0.529236	0.389846	translation
ENSMUSG00000021109	Hif1a	0.333052	0.160302	0.809102	3.23019e-05	1.14215	1.57825e-11	RNA+Ribo	concordant (fwd)	1.11194	6.05562e-05	0.689918	0.00671623	1.05767	0.0025241	0.457789	0.573431	translation
ENSMUSG00000031068	Glrx3	0.862353	0.160302	-0.390036	1	0.472318	0.813109	Unchanged		0.296642	0.450041	-0.432838	0.0713533	0.273397	0.629912	-0.427753	0.143762	background
ENSMUSG00000022885	St6gal1	0.869987	0.160952	0.245314	1	1.1153	0.0547951	Unchanged		0.805336	0.263373	0.36927	0.226912	0.900826	0.326311	0.399433	0.296868	background
ENSMUSG00000025137	Pcyt2	-0.435755	0.161005	-0.695093	0.0273338	-1.13085	5.60356e-08	RNA+Ribo	concordant (fwd)	-1.15443	0.000243944	-0.738934	0.000183978	-0.682643	0.273783	-0.577344	0.0407197	abundance
ENSMUSG00000039103	Nexn	0.610227	0.161703	-0.732297	0.102006	-0.122069	1	Unchanged		-0.176739	0.594107	-0.789015	0.00163994	-0.461558	0.460518	-0.811563	0.0106103	buffering
ENSMUSG00000042473	Tbc1d8b	1.01581	0.161967	0.136569	1	1.15238	0.0234265	Ribo	Ribo exclusive	0.921317	0.148621	0.226582	0.457081	0.97995	0.203748	0.26809	0.492435	background
ENSMUSG00000024241	Sos1	0.606951	0.162311	-0.0166375	1	0.590314	0.355194	Unchanged		0.461408	0.214716	-0.0438366	0.775931	0.457502	0.296782	-0.0405303	0.840707	background
ENSMUSG00000024871	Doc2g	-0.892425	0.162311	-0.299016	1	-1.19144	0.00523929	Ribo	Ribo exclusive	-1.26194	0.00742282	-0.420621	0.159634	-0.782664	0.0556531	0.18624	0.601491	background
ENSMUSG00000031012	Cask	0.507445	0.162311	0.105723	1	0.613169	0.229469	Unchanged		0.574699	0.238903	0.131166	0.40765	0.676716	0.254571	0.157818	0.415547	background
ENSMUSG00000030470	Csrp3	-0.598562	0.16242	0.622611	0.390652	0.0240494	1	Unchanged		-0.0388332	0.910885	0.464679	0.171002	-0.349924	0.230148	0.49675	0.0866967	background
ENSMUSG00000025575	Cant1	-0.59292	0.163278	0.437394	0.895019	-0.155526	1	Unchanged		-0.191587	0.584753	0.50117	0.0209168	-0.189826	0.740793	0.500964	0.0553439	background
ENSMUSG00000019866	Crybg1	1.15865	0.164056	-0.510086	1	0.648559	0.766875	Unchanged		0.417238	0.384779	-0.620678	0.0262066	1.13375	0.0598943	-0.747415	0.019574	buffering
ENSMUSG00000021188	Trip11	0.563134	0.164646	-0.429201	1	0.133933	1	Unchanged		0.0969691	0.769747	-0.542334	0.036015	0.445141	0.247078	-0.58236	0.0399039	buffering
ENSMUSG00000048126	Col6a3	0.857827	0.164662	1.73353	3.17862e-05	2.59136	8.93638e-13	RNA+Ribo	concordant (fwd)	2.45024	4.57908e-05	1.50708	0.00569176	1.48964	0.00633881	-0.680568	0.438042	translation
ENSMUSG00000028233	Tgs1	0.695556	0.164678	-0.232774	1	0.462782	1	Unchanged		0.346609	0.296697	-0.14588	0.603733	0.227925	0.488712	0.0295181	0.925415	background
ENSMUSG00000026923	Notch1	0.659846	0.164734	0.1376	1	0.797446	0.0334905	Ribo	Ribo exclusive	0.836449	0.022293	0.0364177	0.877212	0.795982	0.0287315	-0.246058	0.344332	translation
ENSMUSG00000009030	Pdcl	-0.700931	0.164983	0.0345455	1	-0.666385	0.209244	Unchanged		-0.815194	0.0661109	-0.0846056	0.715888	-0.708772	0.11058	0.114312	0.675572	background
ENSMUSG00000068566	Myadm	0.623727	0.164983	0.246046	1	0.869774	0.0070464	Ribo	Ribo exclusive	0.817967	0.00668884	0.102974	0.724297	0.784219	0.0194654	-0.184352	0.703882	translation
ENSMUSG00000025499	Hras	-0.638745	0.1658	0.0260307	1	-0.612714	0.285575	Unchanged		-0.684137	0.103516	-0.236531	0.55734	-0.632624	0.19802	-0.119839	0.836817	background
ENSMUSG00000012428	Steap4	0.812915	0.166121	0.210877	1	1.02379	0.0232634	Ribo	Ribo exclusive	0.883209	0.0258392	0.0667718	0.836504	0.809742	0.0142642	-0.45874	0.100797	translation
ENSMUSG00000074364	Ehd2	0.501508	0.166227	0.283159	1	0.784667	0.00557161	Ribo	Ribo exclusive	0.792383	0.00338448	0.173727	0.410712	0.737538	0.0155579	-0.0391384	0.928759	translation
ENSMUSG00000026987	Baz2b	0.610566	0.166465	-0.206619	1	0.403947	0.903949	Unchanged		0.215965	0.551403	-0.330333	0.142714	0.184719	0.713936	-0.323245	0.233832	background
ENSMUSG00000014932	Yes1	0.730984	0.166651	0.0460866	1	0.777071	0.196734	Unchanged		0.595535	0.235258	-0.195165	0.608838	0.621951	0.295735	-0.232341	0.633079	background
ENSMUSG00000049037	Clec4a1	1.22884	0.166651	0.52778	1	1.75661	0.00543836	Ribo	Ribo exclusive	1.91398	0.00525695	0.644959	0.144846	1.46864	0.050995	0.0619113	0.936004	background
ENSMUSG00000021124	Vti1b	-0.468205	0.16704	-0.0361695	1	-0.504375	0.406044	Unchanged		-0.54562	0.107172	-0.164121	0.422251	-0.611017	0.13027	-0.226414	0.392159	background
ENSMUSG00000028609	Magoh	0.584047	0.167389	-0.135261	1	0.448785	0.688936	Unchanged		0.376071	0.2146	-0.100042	0.708161	0.381363	0.283117	-0.113351	0.75217	background
ENSMUSG00000018501	Ncor1	0.349604	0.167987	-0.162432	1	0.187172	1	Unchanged		0.141774	0.485622	-0.284128	0.156319	0.212116	0.377762	-0.338802	0.158877	background
ENSMUSG00000020993	Trappc6b	-0.738508	0.167987	-0.071507	1	-0.810015	0.121911	Unchanged		-0.833409	0.0840706	-0.187509	0.363246	-0.600067	0.262751	-0.0516009	0.855363	background
ENSMUSG00000024054	Smchd1	0.528676	0.167987	-0.0333239	1	0.495352	0.446084	Unchanged		0.399567	0.178185	-0.0790375	0.651676	0.390181	0.265306	-0.0677413	0.776853	background
ENSMUSG00000070520	Nsmce3	-0.523354	0.168142	0.404409	1	-0.118946	1	Unchanged		-0.146485	0.539504	0.289022	0.100829	0.0696658	0.817883	0.225029	0.228258	background
ENSMUSG00000058569	Tmed9	-0.467441	0.16958	0.347648	1	-0.119793	1	Unchanged		-0.150044	0.515392	0.197425	0.393421	-0.238252	0.336802	0.284664	0.24883	background
ENSMUSG00000001150	Mcm3ap	0.725722	0.16966	-0.189585	1	0.536137	0.391063	Unchanged		0.757831	0.0873423	-0.225	0.165461	1.25604	0.014981	-0.367289	0.0520499	translation
ENSMUSG00000028292	Rars2	0.602318	0.16966	-0.0829835	1	0.519334	0.515586	Unchanged		0.382307	0.331011	-0.0374558	0.866285	0.367266	0.421347	-0.00639644	0.981295	background
ENSMUSG00000022536	Glyr1	-0.330177	0.169872	-0.124085	1	-0.454262	0.248687	Unchanged		-0.483445	0.0362315	-0.202192	0.144681	-0.346012	0.213881	-0.101832	0.608455	background
ENSMUSG00000038803	Ost4	-0.666399	0.169872	0.369169	1	-0.29723	1	Unchanged		-0.282318	0.35047	0.494646	0.121644	-0.355432	0.359067	0.54395	0.169377	background
ENSMUSG00000025025	Mxi1	-0.577452	0.170293	-0.081536	1	-0.658988	0.155929	Unchanged		-0.764922	0.0281125	-0.0739062	0.74255	-0.776787	0.0561058	-0.114018	0.733415	background
ENSMUSG00000049643	2310022A10Rik	-0.384106	0.170328	0.0845396	1	-0.299567	1	Unchanged		-0.320222	0.0688883	0.158977	0.471607	-0.349344	0.0807089	0.400125	0.243705	background
ENSMUSG00000036181	Hist1h1c	-0.597235	0.170459	0.507479	0.802487	-0.0897555	1	Unchanged		-0.181738	0.547177	0.0941837	0.892481	-0.181696	0.614776	0.0937781	0.913986	background
ENSMUSG00000026032	Ndufb3	-0.79958	0.170941	-0.282708	1	-1.08229	0.00929124	Ribo	Ribo exclusive	-1.26382	0.00937028	-0.434243	0.0838101	-0.767654	0.136197	-0.0703916	0.851054	background
ENSMUSG00000031010	Usp9x	0.632091	0.170941	-0.0344602	1	0.59763	0.19565	Unchanged		0.459627	0.225531	-0.0923876	0.540858	0.303849	0.468209	-0.0265349	0.892517	background
ENSMUSG00000035575	Utp6	0.450674	0.170941	0.0325557	1	0.48323	0.251577	Unchanged		0.460572	0.0476685	-0.0796466	0.692818	0.487438	0.0657267	-0.200526	0.462128	background
ENSMUSG00000027397	Slc20a1	0.962635	0.171426	-0.0375341	1	0.925101	0.281105	Unchanged		0.875913	0.095608	-0.00863883	0.98017	0.877855	0.150149	-0.052415	0.901147	background
ENSMUSG00000052707	Tnrc6a	0.649107	0.171426	-0.271797	1	0.37731	1	Unchanged		0.24251	0.477973	-0.397031	0.0762128	0.622922	0.105745	-0.485972	0.0453007	buffering
ENSMUSG00000061130	Ppm1b	-0.664943	0.171937	0.140438	1	-0.524505	0.374673	Unchanged		-0.628652	0.104762	0.0262523	0.912415	-0.6499	0.124459	0.144919	0.59575	background
ENSMUSG00000020132	Rab21	-0.494784	0.172403	-0.210305	1	-0.705089	0.0233132	Ribo	Ribo exclusive	-0.755528	0.00645737	-0.189645	0.280063	-0.681815	0.033048	-0.0600597	0.8525	translation
ENSMUSG00000020290	Xpo1	0.703693	0.172915	0.222986	1	0.92668	0.0133178	Ribo	Ribo exclusive	0.803754	0.0505413	0.0750582	0.800858	0.755825	0.0896367	-0.127445	0.744619	background
ENSMUSG00000037816	Fbxw17	0.90206	0.172915	0.684974	0.173915	1.58703	0.0027967	Ribo	Ribo exclusive	1.40331	0.00209935	0.65672	0.00152627	2.04025	0.0164006	0.833211	0.0144315	translation
ENSMUSG00000020357	Flt4	0.65502	0.173417	0.275414	1	0.930434	0.0171615	Ribo	Ribo exclusive	1.00706	0.00997501	0.250595	0.196626	0.859708	0.0626798	0.117966	0.708975	background
ENSMUSG00000051329	Nup160	0.554393	0.173417	0.154266	1	0.708659	0.161594	Unchanged		0.490644	0.150724	0.101523	0.501045	0.454082	0.270958	0.082252	0.676223	background
ENSMUSG00000030761	Myo7a	1.07347	0.17387	0.925786	0.208978	1.99925	1.53831e-05	Ribo	Ribo exclusive	1.71394	0.00188651	0.653518	0.12607	1.35397	0.0226521	-0.0540151	0.947477	translation
ENSMUSG00000026596	Abl2	0.564449	0.174488	0.0181999	1	0.582649	0.34373	Unchanged		0.595092	0.0349142	-0.00438261	0.983238	0.598892	0.0469973	-0.169359	0.447886	translation
ENSMUSG00000031897	Psmb10	-0.563439	0.174488	0.879663	0.00681835	0.316224	0.986984	RNA	RNA exclusive	0.293677	0.158038	0.750825	0.00630686	0.364056	0.2336	0.809055	0.0310812	buffering
ENSMUSG00000015647	Lama5	0.774473	0.174546	0.0721779	1	0.846651	0.0967379	Unchanged		0.692718	0.0494926	-0.0460797	0.874013	0.734732	0.0321964	-0.372707	0.19867	translation
ENSMUSG00000021771	Vdac2	-0.436564	0.174546	-0.0312391	1	-0.467803	0.568984	Unchanged		-0.50278	0.052376	-0.313637	0.50239	-0.483801	0.108429	-0.193365	0.797914	background
ENSMUSG00000036442	Thap11	-0.559074	0.174546	0.389427	1	-0.169647	1	Unchanged		-0.107828	0.733006	0.408456	0.0327066	-0.358785	0.391805	0.429996	0.0526914	background
ENSMUSG00000040761	Spen	0.66757	0.174661	-0.149344	1	0.518226	0.561595	Unchanged		0.488513	0.122342	-0.241478	0.320372	0.632896	0.0808224	-0.397321	0.176295	background
ENSMUSG00000034751	Mast4	0.61361	0.175705	0.254524	1	0.868135	0.0127368	Ribo	Ribo exclusive	0.891999	0.0167974	0.131703	0.551496	0.782816	0.049099	-0.0908655	0.781725	translation
ENSMUSG00000019975	Ikbip	-0.664012	0.175826	0.658396	0.333269	-0.00561509	1	Unchanged		-0.0985023	0.787853	0.723813	0.0189543	0.254507	0.606184	0.689868	0.0437658	buffering
ENSMUSG00000041124	Msantd4	-0.508638	0.175989	-0.244969	1	-0.753606	0.0178444	Ribo	Ribo exclusive	-0.850908	0.0105336	-0.356911	0.0653497	-0.663414	0.110029	-0.212942	0.467754	background
ENSMUSG00000054823	Nsd3	0.645629	0.175989	-0.293339	1	0.35229	1	Unchanged		0.112871	0.784308	-0.585959	0.177462	0.364976	0.40499	-0.647226	0.158883	background
ENSMUSG00000058135	Gstm1	-0.849183	0.175989	-0.669402	0.551791	-1.51859	3.92001e-05	Ribo	Ribo exclusive	-1.58529	0.000413433	-0.770426	0.0343152	-1.42202	0.0114107	-0.446072	0.563495	translation
ENSMUSG00000042705	Commd10	-0.611868	0.176187	0.408399	1	-0.203468	1	Unchanged		-0.180899	0.528451	0.397236	0.0289472	-0.451266	0.245689	0.437442	0.0419029	buffering
ENSMUSG00000019854	Reps1	-0.438252	0.176613	0.0601245	1	-0.378128	0.860994	Unchanged		-0.414601	0.087198	0.0595889	0.703501	-0.440417	0.113841	0.11349	0.575564	background
ENSMUSG00000045095	Magi1	0.586787	0.177413	-0.052062	1	0.534725	0.457605	Unchanged		0.475676	0.087589	-0.165662	0.466639	0.596168	0.0466729	-0.382684	0.14155	translation
ENSMUSG00000052727	Map1b	1.0748	0.17748	1.21442	0.0500344	2.28921	2.5393e-07	Ribo	Ribo exclusive	2.01165	0.00136172	0.79124	0.2249	1.50337	0.00571481	-1.02097	0.207812	translation
ENSMUSG00000003360	Ddx23	-0.328397	0.177553	-0.0655459	1	-0.393943	0.567772	Unchanged		-0.405958	0.0316975	-0.101359	0.468969	-0.380298	0.0780673	-0.0263485	0.91441	background
ENSMUSG00000055681	Cope	-0.506256	0.177553	0.0953715	1	-0.410884	0.660092	Unchanged		-0.486534	0.0561471	-0.0463434	0.854463	-0.501865	0.0789247	-0.194816	0.552723	background
ENSMUSG00000035152	Ap2b1	0.629688	0.177714	0.373755	1	1.00344	0.00237778	Ribo	Ribo exclusive	0.857179	0.0197723	0.155854	0.670628	0.744128	0.0287315	-0.42592	0.273547	translation
ENSMUSG00000031924	Cyb5b	-0.401448	0.177753	0.145196	1	-0.256252	1	Unchanged		-0.273176	0.17673	0.130243	0.399536	-0.342968	0.135035	0.224985	0.233115	background
ENSMUSG00000021982	Cdadc1	0.498991	0.177816	-0.696406	0.0257941	-0.197415	1	RNA	RNA exclusive	-0.184189	0.535155	-0.744343	0.000212499	-0.0229997	0.980722	-0.738682	0.00585962	buffering
ENSMUSG00000034636	Zyg11b	0.3539	0.177856	-0.316238	1	0.0376624	1	Unchanged		0.0157329	0.945014	-0.403514	0.0148085	0.168792	0.580925	-0.407356	0.0359147	buffering
ENSMUSG00000008976	Gabpa	-0.429356	0.177865	-0.123909	1	-0.553265	0.170526	Unchanged		-0.634103	0.033066	-0.142776	0.311667	-0.788022	0.0294248	-0.240983	0.187194	translation
ENSMUSG00000021737	Psmd6	-0.335713	0.177896	-0.0431424	1	-0.378856	0.632745	Unchanged		-0.3853	0.0665153	-0.0612885	0.682269	-0.457434	0.0311743	-0.262344	0.0916412	translation
ENSMUSG00000025155	Dus1l	-0.480692	0.17857	-0.0838212	1	-0.564513	0.22063	Unchanged		-0.553016	0.039273	-0.276843	0.341816	-0.561435	0.080016	-0.299681	0.493377	background
ENSMUSG00000025508	Rplp2	-0.736263	0.17857	-0.176255	1	-0.912518	0.0380114	Ribo	Ribo exclusive	-0.94056	0.0230983	-0.28908	0.200913	-0.827487	0.101275	-0.192301	0.570887	background
ENSMUSG00000029406	Pitpnm2	0.670516	0.17857	0.0830755	1	0.753592	0.0784283	Unchanged		0.654863	0.0748007	-0.00497057	0.982844	0.651598	0.114202	0.0797397	0.768942	background
ENSMUSG00000030316	Tamm41	-0.689129	0.17857	0.319168	1	-0.369961	1	Unchanged		-0.39629	0.258042	0.294341	0.0896259	-0.644079	0.158525	0.352866	0.0925282	background
ENSMUSG00000036180	Gatad2a	-0.507683	0.17857	0.317352	1	-0.190331	1	Unchanged		-0.251849	0.339562	0.286282	0.0816592	-0.295803	0.410217	0.298978	0.142441	background
ENSMUSG00000041881	Ndufa7	-0.621202	0.17857	-0.0164872	1	-0.637689	0.182573	Unchanged		-0.726576	0.020288	-0.0513021	0.800532	-0.692672	0.0441126	0.104373	0.713761	translation
ENSMUSG00000067148	Polr1c	-0.486377	0.17857	0.0773927	1	-0.408985	0.77335	Unchanged		-0.38151	0.123841	0.122173	0.535801	-0.406915	0.161249	0.169265	0.515943	background
ENSMUSG00000035517	Tdrd7	0.475598	0.179181	0.306479	1	0.782077	0.0147163	Ribo	Ribo exclusive	0.724231	0.00296413	0.183433	0.350497	0.727296	0.0115641	0.196453	0.627282	translation
ENSMUSG00000061479	Snrpa	-0.517749	0.181229	-0.0193267	1	-0.537075	0.409504	Unchanged		-0.584912	0.0196941	-0.0799829	0.63144	-0.503117	0.0454957	0.155481	0.439412	translation
ENSMUSG00000074994	Qser1	0.708781	0.181229	-0.251191	1	0.45759	1	Unchanged		0.434814	0.387299	-0.282796	0.0813267	-0.124754	0.859837	-0.228381	0.204373	background
ENSMUSG00000028975	Pex14	-0.515039	0.181526	0.144209	1	-0.37083	0.941207	Unchanged		-0.402499	0.115005	0.205671	0.369451	-0.461101	0.125428	0.301458	0.315543	background
ENSMUSG00000072640	Lyrm9	-0.751433	0.181526	-0.025301	1	-0.776734	0.140424	Unchanged		-0.81217	0.0297079	-0.0350931	0.875854	-0.792145	0.059164	0.0811705	0.798387	background
ENSMUSG00000075701	Selenos	-0.66268	0.181526	0.347411	1	-0.315269	1	Unchanged		-0.321286	0.282218	0.228114	0.429692	-0.425507	0.193855	0.363664	0.264953	background
ENSMUSG00000026600	Soat1	1.21178	0.181697	1.25175	0.0283332	2.46353	1.77201e-05	RNA+Ribo	concordant (fwd)	2.25586	0.0018167	1.10413	0.00378559	1.16465	0.230106	0.566666	0.283702	abundance
ENSMUSG00000054199	Gon4l	0.605954	0.182565	-0.0218539	1	0.5841	0.590216	Unchanged		0.721726	0.0309781	-0.275684	0.478013	0.72002	0.0693922	-0.269526	0.653594	background
ENSMUSG00000026563	Tada1	-0.578536	0.182944	0.252407	1	-0.32613	1	Unchanged		-0.272767	0.346676	0.19985	0.150119	-0.514782	0.144732	0.24712	0.128752	background
ENSMUSG00000028367	Txn1	-0.50819	0.183218	0.291254	1	-0.216936	1	Unchanged		-0.230533	0.344978	0.140522	0.566881	-0.283527	0.292329	0.237551	0.396306	background
ENSMUSG00000029518	Rab35	-0.537296	0.183218	-0.0356657	1	-0.572962	0.217405	Unchanged		-0.647634	0.0505413	-0.185306	0.41741	-0.513933	0.149639	0.0113611	0.972543	background
ENSMUSG00000017677	Wsb1	0.658394	0.183634	0.536733	0.459785	1.19513	0.00239374	Ribo	Ribo exclusive	1.07092	0.00499914	0.502881	0.0126653	1.3321	0.0236919	0.630469	0.0454657	translation
ENSMUSG00000019210	Atp6v1e1	-0.418665	0.183634	-0.104885	1	-0.52355	0.21319	Unchanged		-0.561539	0.0358403	-0.162457	0.234246	-0.382873	0.211879	-0.0541955	0.783716	background
ENSMUSG00000021243	Fcf1	-1.11806	0.183634	-0.0134783	1	-1.13154	0.112639	Unchanged		-1.20884	0.00495562	0.234804	0.704093	-1.11409	0.0104228	-0.84389	0.299877	translation
ENSMUSG00000022338	Eny2	-0.69202	0.183634	-0.161515	1	-0.853535	0.0416651	Ribo	Ribo exclusive	-0.977879	0.0275504	-0.281315	0.21233	-1.14037	0.0396104	-0.405053	0.199019	translation
ENSMUSG00000032596	Uba7	0.682855	0.183634	0.343124	1	1.02598	0.00951197	Ribo	Ribo exclusive	1.06307	0.00744392	0.0988597	0.828634	1.04259	0.0209469	-0.185498	0.809731	translation
ENSMUSG00000039735	Fnbp1l	0.564396	0.183634	-0.338116	1	0.22628	1	Unchanged		0.154042	0.623952	-0.337125	0.0796225	0.194812	0.65955	-0.343381	0.137883	background
ENSMUSG00000022475	Hdac7	0.699116	0.183784	0.183838	1	0.882955	0.0489039	Ribo	Ribo exclusive	0.74897	0.0137319	-0.106282	0.845518	0.774569	0.0208201	-0.721798	0.327483	translation
ENSMUSG00000079334	Naa80	-0.573084	0.183837	0.151883	1	-0.421202	0.825815	Unchanged		-0.475977	0.108122	0.0181627	0.941536	-0.486473	0.133698	0.144846	0.601732	background
ENSMUSG00000031988	Vps26b	-0.408205	0.183899	0.221461	1	-0.186744	1	Unchanged		-0.168052	0.483181	-0.00939443	0.982357	-0.168133	0.550926	-0.0133898	0.977142	background
ENSMUSG00000032563	Mrpl3	0.399253	0.184006	-0.338061	1	0.0611917	1	Unchanged		0.0303374	0.89867	-0.703294	0.180285	-0.038587	0.892093	-0.673497	0.257758	background
ENSMUSG00000070469	Adamtsl3	0.841244	0.184206	0.597587	0.735706	1.43883	0.000723725	Ribo	Ribo exclusive	1.41686	0.00726044	0.331284	0.413761	1.25478	0.0298979	-0.0914997	0.897486	translation
ENSMUSG00000036989	Trim3	0.490931	0.184534	0.145019	1	0.63595	0.093111	Unchanged		0.565171	0.0259569	0.0683291	0.689481	0.605365	0.0351615	0.196273	0.39236	translation
ENSMUSG00000050812	Ecpas	0.495095	0.185796	-0.33483	1	0.160264	1	Unchanged		0.128014	0.656433	-0.413843	0.038468	0.315103	0.412761	-0.440109	0.0613225	background
ENSMUSG00000022558	Mroh1	0.751359	0.185825	0.104481	1	0.855839	0.0548873	Unchanged		1.14842	0.0233109	0.00205652	0.993572	1.14651	0.0398281	-0.156669	0.61547	translation
ENSMUSG00000037353	Letmd1	0.630622	0.186235	-0.370075	1	0.260547	1	Unchanged		0.318097	0.342697	-0.406846	0.0104087	0.928187	0.0749052	-0.462757	0.0174371	buffering
ENSMUSG00000033417	Cacul1	-0.429304	0.186628	0.1961	1	-0.233204	1	Unchanged		-0.312991	0.166723	0.162701	0.199465	-0.202741	0.492314	0.120041	0.452367	background
ENSMUSG00000079477	Rab7	-0.500878	0.186628	-0.531453	0.665443	-1.03233	5.78791e-05	Ribo	Ribo exclusive	-1.10083	0.000940905	-0.75416	0.0241629	-0.702176	0.0334111	0.14786	0.798694	translation
ENSMUSG00000020388	Pdlim4	-0.637963	0.187099	0.117861	1	-0.520102	0.717493	Unchanged		-0.499463	0.084316	0.0664897	0.771234	-0.543264	0.0818057	0.232051	0.380299	background
ENSMUSG00000021952	Xpo4	0.494055	0.187099	0.0726452	1	0.5667	0.299395	Unchanged		0.442923	0.0688883	0.12438	0.523152	0.391844	0.153779	0.00954343	0.973776	background
ENSMUSG00000026860	Sh3glb2	-0.503891	0.187099	0.130886	1	-0.373004	1	Unchanged		-0.438941	0.0909916	0.124678	0.472981	-0.535037	0.0661274	0.250667	0.230393	background
ENSMUSG00000033701	Acbd6	-0.511992	0.187099	-0.0727318	1	-0.584723	0.190686	Unchanged		-0.620911	0.0212304	-0.235064	0.341816	-0.763884	0.0120913	-0.602728	0.06522	translation
ENSMUSG00000038150	Ormdl3	-0.499109	0.187099	0.261943	1	-0.237166	1	Unchanged		-0.220516	0.377654	0.281107	0.179815	-0.246037	0.436885	0.296562	0.25566	background
ENSMUSG00000020788	Atp2a3	0.756659	0.18724	0.341056	1	1.09772	0.0278242	Ribo	Ribo exclusive	1.02287	0.0153709	0.163234	0.566746	0.955293	0.045802	-0.0116368	0.980386	translation
ENSMUSG00000041638	Gcn1l1	0.620641	0.18724	0.187328	1	0.807969	0.0930844	Unchanged		0.902537	0.024003	0.0805439	0.746689	0.847134	0.0527995	-0.109725	0.758112	background
ENSMUSG00000028729	Ebna1bp2	-0.504148	0.18759	0.0930271	1	-0.411121	0.762012	Unchanged		-0.450946	0.0488478	0.123859	0.642235	-0.472893	0.0717529	0.258238	0.499391	background
ENSMUSG00000038696	Mapkap1	-0.464129	0.18759	-0.0126842	1	-0.476813	0.502766	Unchanged		-0.58284	0.130961	-0.0113356	0.942055	-0.587633	0.190246	-0.0251273	0.897878	background
ENSMUSG00000069114	Zbtb10	0.541037	0.18759	-0.409924	1	0.131113	1	Unchanged		0.249762	0.306922	-0.550715	0.0358833	0.347358	0.289697	-0.608813	0.0661399	background
ENSMUSG00000071757	Zhx2	-0.385686	0.18759	-0.0977907	1	-0.483477	0.285551	Unchanged		-0.520628	0.0148194	-0.182144	0.347829	-0.497714	0.0443689	-0.0958852	0.796765	translation
ENSMUSG00000035697	Arhgap45	1.13761	0.18792	0.667554	0.845835	1.80516	0.00183079	Ribo	Ribo exclusive	1.53885	0.00756921	0.491573	0.158286	1.12018	0.0648636	0.000405424	0.999721	background
ENSMUSG00000030319	Cand2	0.618619	0.188217	0.125795	1	0.744414	0.0649013	Unchanged		0.628066	0.0512662	0.0446181	0.829601	0.66359	0.059164	0.191113	0.43795	background
ENSMUSG00000039952	Dag1	-0.231869	0.188217	-0.142212	1	-0.374081	0.27188	Unchanged		-0.403927	0.029487	-0.229852	0.119808	-0.307619	0.145493	-0.0394045	0.880682	background
ENSMUSG00000022961	Son	0.396999	0.189076	-0.372615	1	0.0243842	1	Unchanged		-0.0142905	0.94873	-0.487883	0.0302263	0.170066	0.491777	-0.477255	0.0469862	buffering
ENSMUSG00000026526	Fh1	-0.317393	0.189264	-0.46402	0.386848	-0.781413	8.71171e-05	Ribo	Ribo exclusive	-0.809777	0.00125809	-0.538988	0.00400567	-0.773318	0.0304501	-0.499624	0.145303	translation
ENSMUSG00000021773	Comtd1	-0.812446	0.189689	0.934396	0.102805	0.12195	1	Unchanged		0.00793954	0.983786	0.955846	0.0192661	0.215655	0.65955	0.958444	0.043088	buffering
ENSMUSG00000031871	Cdh5	0.700044	0.189689	0.115441	1	0.815485	0.0940953	Unchanged		0.691244	0.0765234	-0.241282	0.701516	0.756018	0.0783107	-0.666207	0.381119	background
ENSMUSG00000013646	Sh3bp5l	-0.574974	0.189713	0.238513	1	-0.336462	1	Unchanged		-0.305528	0.325009	0.0224205	0.955525	-0.295875	0.368329	-0.135722	0.739277	background
ENSMUSG00000026837	Col5a1	0.95966	0.189713	1.90917	2.47706e-05	2.86883	3.79147e-13	RNA+Ribo	concordant (fwd)	2.68772	2.47681e-05	1.627	0.00834434	1.78857	0.00243633	-1.09976	0.313632	translation
ENSMUSG00000036438	Calm2	-0.587832	0.189713	0.375683	1	-0.212148	1	Unchanged		-0.342748	0.356068	0.350772	0.0843878	-0.489001	0.328963	0.38474	0.121245	background
ENSMUSG00000031523	Dlc1	0.339928	0.190067	-0.0944147	1	0.245513	1	Unchanged		0.253412	0.267577	-0.228921	0.27816	0.295613	0.27917	-0.276395	0.301219	background
ENSMUSG00000031314	Taf1	0.598762	0.190303	-0.126575	1	0.472187	0.646419	Unchanged		0.398909	0.264331	-0.121482	0.513281	0.398902	0.356502	-0.121477	0.609422	background
ENSMUSG00000030697	Ppp4c	-0.39469	0.190386	0.427477	0.724661	0.0327869	1	Unchanged		0.0163625	0.942108	0.349086	0.0296822	-0.104843	0.725667	0.345141	0.0643586	background
ENSMUSG00000024287	Thoc1	0.59535	0.190475	-0.11665	1	0.4787	0.668249	Unchanged		0.435208	0.14481	-0.287846	0.360305	0.50589	0.151489	-0.406108	0.312931	background
ENSMUSG00000036986	Pml	0.627073	0.190696	0.673097	0.13496	1.30017	0.000211262	Ribo	Ribo exclusive	1.25454	0.000163904	0.690146	0.00803773	1.71425	0.000623072	1.55734	0.00819003	translation
ENSMUSG00000030067	Foxp1	-0.484572	0.190792	-0.317091	1	-0.801663	0.0133775	Ribo	Ribo exclusive	-0.853887	0.00468953	-0.353132	0.0346007	-0.619871	0.104606	-0.192589	0.453031	abundance
ENSMUSG00000040565	Btaf1	0.601258	0.190963	-0.0565518	1	0.544706	0.683299	Unchanged		0.512527	0.156125	-0.246709	0.438639	0.699296	0.0567694	-0.514481	0.119265	background
ENSMUSG00000021374	Nup153	0.434618	0.191144	-0.0616249	1	0.372993	0.892434	Unchanged		0.274099	0.291113	-0.119361	0.492293	0.175317	0.545242	-0.0347226	0.875113	background
ENSMUSG00000052384	Nrros	1.23646	0.191144	1.25252	0.0290727	2.48898	3.31369e-05	RNA+Ribo	concordant (fwd)	2.57926	0.00204963	1.08427	0.00491802	2.28895	0.072726	0.956026	0.118764	abundance
ENSMUSG00000053841	Txlna	-0.53626	0.191144	0.115819	1	-0.420442	0.883994	Unchanged		-0.437404	0.135224	0.098416	0.505335	-0.570411	0.0741641	0.188071	0.263136	background
ENSMUSG00000078652	Psme3	-0.462755	0.191144	-0.0835102	1	-0.546265	0.181757	Unchanged		-0.631068	0.0818667	-0.0749164	0.656517	-0.639049	0.135514	-0.0836486	0.717397	background
ENSMUSG00000019868	Vta1	-0.622851	0.19154	0.308111	1	-0.31474	1	Unchanged		-0.24425	0.467131	0.372582	0.0858935	-0.0323077	0.9456	0.321134	0.1985	background
ENSMUSG00000022946	Dop1b	0.656674	0.19154	0.282729	1	0.939403	0.017446	Ribo	Ribo exclusive	1.08998	0.00742859	-0.0238337	0.96575	1.09013	0.0209909	-0.0348116	0.970267	translation
ENSMUSG00000030782	Tgfb1i1	0.759736	0.19154	0.725568	0.288326	1.4853	3.16068e-05	Ribo	Ribo exclusive	1.35918	0.000608025	0.695858	0.018564	1.46129	0.00830046	0.845423	0.147226	translation
ENSMUSG00000034928	Rnf44	-0.508672	0.191828	0.160236	1	-0.348436	1	Unchanged		-0.408397	0.084655	0.0498068	0.834471	-0.379188	0.119234	-0.18891	0.470698	background
ENSMUSG00000023021	Cers5	0.54718	0.192086	0.225744	1	0.772924	0.0238201	Ribo	Ribo exclusive	0.735295	0.0108261	-0.0145946	0.973813	0.73513	0.0275174	0.0041571	0.99588	translation
ENSMUSG00000041444	Arhgap32	0.822747	0.192608	0.576515	0.540824	1.39926	0.00460689	Ribo	Ribo exclusive	1.1448	0.0134516	0.635588	0.00823449	0.93847	0.197986	0.562479	0.0932712	abundance
ENSMUSG00000028088	Fmo5	0.636893	0.192748	-0.367346	1	0.269547	1	Unchanged		0.192773	0.523598	-0.487155	0.060227	0.664847	0.0203226	-0.626537	0.0126819	translation
ENSMUSG00000028394	Pole3	-0.654299	0.193244	0.0245708	1	-0.629728	0.256775	Unchanged		-0.69185	0.0217319	0.00334961	0.991939	-0.692901	0.0404213	0.198319	0.639766	translation
ENSMUSG00000040550	Otud6b	-0.530433	0.194313	-0.178333	1	-0.708766	0.0762519	Unchanged		-0.807396	0.0518567	-0.144804	0.387856	-0.792078	0.118099	-0.13578	0.556012	background
ENSMUSG00000004098	Col5a3	0.931609	0.194438	1.7085	7.46966e-05	2.64011	2.38804e-12	RNA+Ribo	concordant (fwd)	2.52108	1.93035e-05	1.34844	0.0597795	2.06119	0.000623072	-1.81866	0.263997	translation
ENSMUSG00000018932	Map2k3	-0.479971	0.194438	-0.412393	1	-0.892365	0.00117874	Ribo	Ribo exclusive	-0.96595	0.00238034	-0.541669	0.0226983	-0.537581	0.0995493	-0.0189764	0.959891	abundance
ENSMUSG00000020918	Kat2a	0.520491	0.194438	0.330757	1	0.851248	0.0105748	Ribo	Ribo exclusive	0.865402	0.00335402	0.313213	0.0319814	0.546821	0.131611	0.135228	0.535239	abundance
ENSMUSG00000025465	Echs1	-0.400903	0.194438	-0.511847	0.307412	-0.91275	9.03983e-06	Ribo	Ribo exclusive	-0.960499	0.000685547	-0.62987	0.0055991	-0.772855	0.0344371	-0.364546	0.403079	translation
ENSMUSG00000030727	Rabep2	-0.559859	0.194438	0.851995	0.0103659	0.292137	1	RNA	RNA exclusive	0.345423	0.254848	0.754445	0.000353476	-0.380246	0.598228	0.694159	0.00728131	buffering
ENSMUSG00000033014	Trim33	0.532529	0.194438	0.000821966	1	0.533351	0.579974	Unchanged		0.47691	0.168222	-0.256994	0.521906	0.481863	0.243961	-0.268367	0.617537	background
ENSMUSG00000033788	Dysf	0.675891	0.194438	0.399133	1	1.07502	0.00212546	Ribo	Ribo exclusive	0.990639	0.00723628	0.280314	0.366075	0.742194	0.0173868	-0.416346	0.202654	translation
ENSMUSG00000037152	Ndufc1	0.868917	0.194438	-0.175876	1	0.693041	0.244508	Unchanged		0.555732	0.208832	-0.225635	0.269553	0.584296	0.295979	-0.23675	0.360223	background
ENSMUSG00000042404	Dennd4b	0.605547	0.194438	-0.191079	1	0.414468	0.864173	Unchanged		0.347843	0.284012	-0.366107	0.198908	0.387787	0.343674	-0.394752	0.272051	background
ENSMUSG00000061462	Obscn	0.479868	0.194438	-0.575361	0.319307	-0.0954934	1	Unchanged		-0.15385	0.518343	-0.678646	0.00773735	0.129976	0.714443	-0.601694	0.033461	buffering
ENSMUSG00000078941	Taf9	-0.717142	0.194996	0.0446403	1	-0.672501	0.232076	Unchanged		-0.60063	0.176022	-0.0570233	0.790329	-0.595617	0.254889	-0.0493539	0.865663	background
ENSMUSG00000008690	Ncaph2	-0.441739	0.195246	0.160921	1	-0.280818	1	Unchanged		-0.206009	0.476512	0.0656705	0.692818	-0.239177	0.476498	0.089216	0.65234	background
ENSMUSG00000005899	Smpd4	0.564032	0.196327	0.271165	1	0.835197	0.0385213	Ribo	Ribo exclusive	0.852485	0.0134133	0.0962908	0.756131	0.892233	0.0219762	0.36718	0.39845	translation
ENSMUSG00000018263	Tbx5	-0.572004	0.196563	-0.44928	1	-1.02128	0.000851434	Ribo	Ribo exclusive	-0.98	0.00136312	-0.593136	0.086819	-0.804884	0.0171016	0.0414732	0.956235	translation
ENSMUSG00000039782	Cpeb2	0.527636	0.196563	0.295568	1	0.823204	0.0144762	Ribo	Ribo exclusive	0.875719	0.00467644	0.194472	0.384378	0.732493	0.0208698	-0.202654	0.538178	translation
ENSMUSG00000010392	Gosr1	-0.645743	0.19743	-0.0564091	1	-0.702152	0.169566	Unchanged		-0.847016	0.0286586	0.0816371	0.811904	-0.801963	0.0527995	-0.220489	0.618446	background
ENSMUSG00000013160	Atp6v0d1	-0.329622	0.197615	-0.0199499	1	-0.349572	0.89116	Unchanged		-0.38969	0.0823726	-0.0417303	0.764286	-0.344072	0.147622	0.0583714	0.737323	background
ENSMUSG00000020354	Sgcd	-0.373227	0.198327	0.108238	1	-0.264989	1	Unchanged		-0.348002	0.196429	-0.0109024	0.962013	-0.353395	0.239009	-0.0896084	0.726202	background
ENSMUSG00000020463	Ppp4r3b	0.565412	0.198327	-0.0948815	1	0.47053	1	Unchanged		0.355876	0.287172	-0.389435	0.397276	0.44471	0.246753	-0.544274	0.321289	background
ENSMUSG00000025920	Stau2	-0.547553	0.198327	-0.407532	1	-0.955085	0.00279931	Ribo	Ribo exclusive	-1.03438	0.00819998	-0.53987	0.0184945	-0.737873	0.165325	-0.368624	0.267301	abundance
ENSMUSG00000039497	Dse	1.17253	0.198327	1.07271	0.00377537	2.24523	3.36769e-05	RNA+Ribo	concordant (fwd)	1.8942	0.000673391	0.809088	0.0525928	1.49843	0.0171016	0.100045	0.909109	translation
ENSMUSG00000027303	Ptpra	0.57831	0.198786	0.483876	0.674495	1.06219	0.00196105	Ribo	Ribo exclusive	1.04734	0.00479244	0.501024	0.00707489	0.952091	0.106019	0.464898	0.0908835	abundance
ENSMUSG00000018821	Avpi1	-0.778815	0.198918	0.267638	1	-0.511177	0.660283	Unchanged		-0.646397	0.0821366	0.214363	0.369501	-0.791903	0.0659276	0.365477	0.217944	background
ENSMUSG00000022051	Bnip3l	-0.695326	0.198918	-0.0839624	1	-0.779288	0.163941	Unchanged		-0.885484	0.0117453	0.000765417	0.998618	-0.885784	0.0250522	0.216966	0.612798	translation
ENSMUSG00000051331	Cacna1c	0.49643	0.198918	-0.527135	0.523088	-0.0307045	1	Unchanged		-0.0846359	0.734352	-0.64896	0.01753	0.190897	0.536481	-0.594173	0.0402064	buffering
ENSMUSG00000029469	Ift81	-0.57958	0.199596	-0.517914	0.751889	-1.09749	0.000295323	Ribo	Ribo exclusive	-1.23478	0.00214204	-0.576297	0.00770356	-1.34955	0.0296998	-0.639279	0.072023	translation
ENSMUSG00000018363	Smurf2	0.50869	0.199837	0.176954	1	0.685645	0.129437	Unchanged		0.39387	0.328736	0.0657677	0.705653	0.38175	0.425854	0.0577791	0.7993	background
ENSMUSG00000034601	2700049A03Rik	0.825241	0.199837	-0.196068	1	0.629172	0.661905	Unchanged		0.568352	0.216284	-0.106808	0.699354	0.431134	0.308875	0.0865049	0.765131	background
ENSMUSG00000042529	Kcnj12	-0.555088	0.199837	-0.300342	1	-0.85543	0.01615	Ribo	Ribo exclusive	-0.838105	0.0165831	-0.385756	0.0355618	-0.715862	0.142975	-0.327492	0.213286	abundance
ENSMUSG00000057134	Ado	-0.703541	0.199837	0.442146	1	-0.261396	1	Unchanged		-0.325408	0.279284	0.314135	0.290229	-0.104918	0.741027	0.0878695	0.778772	background
ENSMUSG00000031835	Mbtps1	0.620556	0.199956	0.452429	0.968047	1.07298	0.00462059	Ribo	Ribo exclusive	0.992907	0.0183231	0.409295	0.00312162	0.297239	0.777465	0.357839	0.0348688	abundance
ENSMUSG00000078920	Ifi47	1.33909	0.199956	1.05165	0.0539097	2.39075	6.4373e-05	Ribo	Ribo exclusive	2.61431	0.000329027	1.05394	0.00365979	3.42001	0.00364812	1.57379	0.0242333	translation
ENSMUSG00000048000	Gigyf2	0.385914	0.200041	-0.207639	1	0.178275	1	Unchanged		0.203616	0.444361	-0.287792	0.0465693	0.55266	0.1043	-0.337425	0.044637	buffering
ENSMUSG00000026254	Eif4e2	-0.524542	0.200746	0.110115	1	-0.414427	0.805364	Unchanged		-0.619533	0.188603	0.135951	0.387559	-0.463287	0.42101	0.0915819	0.647736	background
ENSMUSG00000028101	Pias3	0.614407	0.200746	0.409797	1	1.0242	0.00752714	Ribo	Ribo exclusive	0.930062	0.00276299	0.297343	0.122778	1.02875	0.0098662	0.443158	0.191727	translation
ENSMUSG00000038650	Rnh1	-0.621346	0.201083	0.527658	0.709715	-0.0936876	1	Unchanged		-0.218952	0.474602	0.315947	0.355854	-0.361947	0.261332	0.447481	0.210817	background
ENSMUSG00000028402	Mpdz	0.505851	0.202212	-0.0730075	1	0.432844	0.608341	Unchanged		0.514538	0.0804025	-0.210548	0.436071	0.647827	0.0406965	-0.47829	0.124652	translation
ENSMUSG00000032271	Nnmt	0.862528	0.202212	0.653009	0.311545	1.51554	0.00454845	Ribo	Ribo exclusive	1.33095	0.00150218	0.616074	0.00663871	1.55452	0.0171016	0.747053	0.0529681	translation
ENSMUSG00000027204	Fbn1	1.06467	0.202219	2.04153	7.46966e-05	3.1062	4.47076e-12	RNA+Ribo	concordant (fwd)	2.82821	0.000132605	1.6293	0.0357103	1.67672	0.000623072	-1.901	0.0140685	translation
ENSMUSG00000030313	Dennd5b	0.698087	0.202345	-0.402305	1	0.295782	1	Unchanged		0.110516	0.854214	-0.449662	0.01428	0.453519	0.63518	-0.455082	0.0371017	buffering
ENSMUSG00000047250	Ptgs1	0.740418	0.202671	0.283407	1	1.02382	0.0268736	Ribo	Ribo exclusive	0.967648	0.0087448	0.129523	0.681012	0.907163	0.0242367	-0.200503	0.675572	translation
ENSMUSG00000021520	Uqcrb	-1.20103	0.20272	0.121684	1	-1.07934	0.179481	Unchanged		-1.28942	0.0990021	0.0941762	0.770299	-1.26805	0.165988	0.0601767	0.89707	background
ENSMUSG00000009575	Cbx5	-0.5698	0.203327	0.186377	1	-0.383423	0.782862	Unchanged		-0.560511	0.1592	0.12331	0.51361	-0.566031	0.239227	0.127107	0.608455	background
ENSMUSG00000019797	1700021F05Rik	-0.427991	0.203327	-0.543526	0.369979	-0.971516	0.000221425	Ribo	Ribo exclusive	-1.02232	0.000785292	-0.654817	0.00492362	-1.2973	0.00526013	-0.969788	0.0312613	translation
ENSMUSG00000020519	Sap30l	-0.596523	0.203327	-0.214644	1	-0.811168	0.05245	Unchanged		-0.81512	0.00386527	-0.346412	0.140025	-0.933762	0.00865522	-0.61812	0.133229	translation
ENSMUSG00000025047	Pdcd11	0.537038	0.203327	-0.259275	1	0.277763	1	Unchanged		0.298627	0.307055	-0.572241	0.236668	0.320284	0.375182	-0.607298	0.322539	background
ENSMUSG00000027678	Ncoa3	0.473415	0.203327	-0.131403	1	0.342012	0.867694	Unchanged		0.393688	0.185595	-0.13429	0.404432	0.544813	0.0970126	-0.225076	0.219738	background
ENSMUSG00000038766	Gabpb2	0.624161	0.203327	-0.214436	1	0.409725	1	Unchanged		0.273109	0.473359	-0.327524	0.0921426	-0.17648	0.691503	-0.250129	0.205345	background
ENSMUSG00000042198	Chchd7	-0.619531	0.203327	-0.703572	0.231754	-1.3231	1.11227e-05	Ribo	Ribo exclusive	-1.35469	0.00245107	-0.756948	0.00081509	-2.05927	0.0194472	-0.944925	0.010415	translation
ENSMUSG00000001750	Tcirg1	1.00673	0.203533	0.811158	0.402428	1.81789	0.00043786	Ribo	Ribo exclusive	1.84285	0.00572301	0.58883	0.125377	1.71587	0.0386079	0.451406	0.48133	translation
ENSMUSG00000021285	Ppp1r13b	-0.482983	0.203533	-0.517324	0.423167	-1.00031	0.000206659	Ribo	Ribo exclusive	-1.03852	0.000496246	-0.754552	0.0583573	-0.840143	0.00927165	0.273912	0.763496	translation
ENSMUSG00000033713	Foxn3	-0.523722	0.203533	-1.00802	0.000210985	-1.53174	4.57499e-10	RNA+Ribo	concordant (fwd)	-1.52261	0.000171188	-0.954667	0.000465141	-0.839574	0.157757	-0.514893	0.216676	abundance
ENSMUSG00000036777	Anln	1.5276	0.203533	2.11507	0.000453035	3.64267	1.03841e-06	RNA+Ribo	concordant (fwd)	3.39115	0.000296492	1.86736	0.000850212	2.42655	0.0932598	1.30479	0.151058	abundance
ENSMUSG00000021573	Tppp	-0.655708	0.203858	-0.432802	1	-1.08851	0.00483787	Ribo	Ribo exclusive	-1.22578	0.00244087	-0.405924	0.116297	-1.15648	0.0208	-0.302965	0.523788	translation
ENSMUSG00000021687	Scamp1	0.387988	0.203909	-0.209153	1	0.178835	1	Unchanged		0.142887	0.541095	-0.204149	0.104483	0.244476	0.442265	-0.217473	0.148382	background
ENSMUSG00000022698	Naa50	-0.506046	0.203909	-0.115391	1	-0.621437	0.140961	Unchanged		-0.654781	0.00717644	-0.314351	0.298411	-0.610575	0.0291295	-0.0752845	0.905114	translation
ENSMUSG00000022894	Adamts5	0.616586	0.204061	0.142454	1	0.75904	0.0698193	Unchanged		0.747634	0.014563	-0.141002	0.768304	0.698863	0.0268631	0.545119	0.36918	translation
ENSMUSG00000026207	Speg	0.580548	0.204401	-0.102324	1	0.478224	0.596076	Unchanged		0.421946	0.158038	-0.161249	0.441751	0.435866	0.225484	-0.176421	0.52092	background
ENSMUSG00000029502	Golga3	-0.329024	0.204797	-0.0294958	1	-0.35852	1	Unchanged		-0.361847	0.080642	-0.166203	0.453902	-0.30005	0.185591	0.0535761	0.871054	background
ENSMUSG00000016253	Nelfcd	-0.35241	0.205075	0.113265	1	-0.239145	1	Unchanged		-0.26745	0.187814	-0.153193	0.703099	-0.302441	0.161249	-0.529978	0.225739	background
ENSMUSG00000026553	Copa	0.269497	0.205075	0.115372	1	0.384869	0.491377	Unchanged		0.356257	0.0778968	-0.00521041	0.983667	0.358557	0.0955285	-0.269331	0.311585	background
ENSMUSG00000027284	Cdan1	0.681678	0.205075	-0.049086	1	0.632592	0.296943	Unchanged		0.575125	0.0213888	-0.231529	0.426831	0.582877	0.0479723	-0.26597	0.58156	translation
ENSMUSG00000031070	Mrgprf	1.00194	0.205075	1.12875	0.0132433	2.13069	5.81642e-05	RNA+Ribo	concordant (fwd)	1.88752	0.000185913	1.31161	0.0046034	1.79132	0.0130238	1.15852	0.218578	translation
ENSMUSG00000054619	Mettl7a1	-0.573253	0.205109	-0.123124	1	-0.696377	0.121564	Unchanged		-0.668222	0.019149	-0.235762	0.299258	-0.487801	0.0835993	0.117827	0.695504	background
ENSMUSG00000013629	Cad	0.806403	0.205811	0.632898	0.716114	1.4393	0.000364242	Ribo	Ribo exclusive	1.42618	0.00391602	0.330608	0.484717	1.26443	0.014981	-0.36992	0.615509	translation
ENSMUSG00000021552	Gkap1	-0.689313	0.205811	-0.148295	1	-0.837608	0.164703	Unchanged		-1.00866	0.017922	-0.207136	0.274559	-0.930939	0.071411	-0.147277	0.610576	background
ENSMUSG00000040407	Akap9	0.451268	0.205811	-0.263255	1	0.188013	1	Unchanged		0.240683	0.401097	-0.298787	0.116993	0.289864	0.446315	-0.314635	0.179931	background
ENSMUSG00000021786	Oxsm	0.427748	0.205876	-0.299975	1	0.127774	1	Unchanged		0.137326	0.595409	-0.25904	0.116161	0.320466	0.297412	-0.295659	0.116914	background
ENSMUSG00000022528	Hes1	-0.486679	0.205876	0.20844	1	-0.278238	1	Unchanged		-0.296434	0.178818	0.155567	0.484305	-0.338962	0.179474	0.254391	0.362895	background
ENSMUSG00000025037	Maoa	0.865665	0.205876	0.611262	0.455992	1.47693	0.00875554	Ribo	Ribo exclusive	1.51443	0.00278313	0.614883	0.00317302	1.32472	0.119374	0.561467	0.0694386	abundance
ENSMUSG00000047141	Zfp654	0.570115	0.205876	-0.255769	1	0.314347	1	Unchanged		0.235696	0.436613	-0.309842	0.0887391	0.392906	0.319833	-0.345947	0.113492	background
ENSMUSG00000059022	Kcp	1.34256	0.205876	0.534961	1	1.87752	0.0026327	Ribo	Ribo exclusive	1.82164	0.000701278	0.404558	0.315553	1.64936	0.00608104	-0.196573	0.816607	translation
ENSMUSG00000068855	Hist2h2ac	-0.881798	0.205876	0.819547	0.329793	-0.0622512	1	Unchanged		-0.217447	0.578363	0.768757	0.0236735	-0.53983	0.31324	0.830264	0.0377691	buffering
ENSMUSG00000035247	Hectd1	0.614973	0.20639	-0.252761	1	0.362212	0.993029	Unchanged		0.416399	0.238038	-0.310095	0.107622	0.578946	0.20906	-0.360983	0.131493	background
ENSMUSG00000051373	Plpp7	-0.625524	0.206677	0.506608	0.856645	-0.118917	1	Unchanged		-0.177718	0.572433	0.332937	0.288946	-0.0337531	0.930222	0.251952	0.465932	background
ENSMUSG00000060036	Rpl3	1.43781	0.20731	1.56696	0.001388	3.00477	9.86336e-08	RNA+Ribo	concordant (fwd)	2.55195	0.000329027	1.64318	0.000581692	2.37432	0.0535358	1.53983	0.0563525	abundance
ENSMUSG00000038028	Tigar	-0.573769	0.20748	-0.061485	1	-0.635254	0.164346	Unchanged		-0.715252	0.019838	-0.273532	0.430468	-0.735431	0.0440401	-0.3491	0.522673	translation
ENSMUSG00000063550	Nup98	0.381475	0.20748	-0.0107615	1	0.370714	0.848914	Unchanged		0.310452	0.224233	-0.0543793	0.71109	0.330049	0.265181	-0.0768108	0.676341	background
ENSMUSG00000024767	Otub1	-0.557314	0.208189	-0.0132167	1	-0.570531	0.275022	Unchanged		-0.548735	0.0677972	-0.156122	0.521506	-0.441993	0.158109	0.0693354	0.830592	background
ENSMUSG00000020380	Rad50	0.514969	0.208265	0.215721	1	0.73069	0.116695	Unchanged		0.706641	0.0173927	0.0150274	0.965758	0.700163	0.0291349	-0.341336	0.420038	translation
ENSMUSG00000041229	Phf8	0.5128	0.208265	-0.194231	1	0.318569	1	Unchanged		0.206452	0.565454	-0.226882	0.144707	0.0507555	0.92215	-0.20873	0.256421	background
ENSMUSG00000040616	Tmem51	-0.928531	0.208453	0.652692	0.871082	-0.275839	1	Unchanged		-0.520603	0.328736	0.598115	0.0298652	-1.03681	0.155932	0.689484	0.0376496	buffering
ENSMUSG00000002885	Adgre5	0.265493	0.208482	0.0292893	1	0.294782	1	Unchanged		0.255866	0.18442	-0.0807362	0.648877	0.292392	0.166658	-0.210735	0.314933	background
ENSMUSG00000054843	Atrnl1	0.481308	0.210586	-0.226976	1	0.254332	1	Unchanged		0.225972	0.518343	-0.258637	0.0575047	0.861172	0.0383933	-0.302628	0.044637	translation
ENSMUSG00000060032	H2afj	-0.901298	0.211002	0.455417	1	-0.445881	0.95977	Unchanged		-0.632607	0.155466	0.524336	0.155378	-0.69081	0.230576	0.567315	0.236267	background
ENSMUSG00000024750	Zfand5	-0.459131	0.211103	-0.421051	0.902867	-0.880182	0.000730657	Ribo	Ribo exclusive	-0.940432	0.00376556	-0.491108	0.00879426	-1.11308	0.0278312	-0.585239	0.0513063	translation
ENSMUSG00000025907	Rb1cc1	0.588433	0.211162	-0.613285	0.415682	-0.0248527	1	Unchanged		-0.0197349	0.96284	-0.677318	0.0060225	0.162382	0.8207	-0.675793	0.0229811	buffering
ENSMUSG00000026857	Ntmt1	-0.581453	0.211162	0.393661	1	-0.187792	1	Unchanged		-0.229826	0.379023	0.216931	0.435206	-0.240137	0.446315	0.230565	0.505592	background
ENSMUSG00000038521	C1s1	0.803092	0.211162	0.510617	1	1.31371	0.00188555	Ribo	Ribo exclusive	1.12503	0.0155378	0.554487	0.0803336	0.75149	0.162623	0.213069	0.643534	background
ENSMUSG00000051586	Mical3	0.64782	0.211162	0.121631	1	0.769451	0.12517	Unchanged		0.659933	0.0686071	0.0425172	0.850003	0.634608	0.117293	-0.0584305	0.847742	background
ENSMUSG00000071415	Rpl23	-1.12011	0.211647	-0.124414	1	-1.24452	0.0814326	Unchanged		-1.75931	0.0821635	-0.338241	0.413682	-1.47331	0.207346	-0.138954	0.814445	background
ENSMUSG00000038349	Plcl1	0.542326	0.211706	-0.175445	1	0.36688	1	Unchanged		0.264497	0.279994	-0.119696	0.570706	0.223401	0.43031	-0.0516037	0.856938	background
ENSMUSG00000029231	Pdgfra	0.420543	0.212026	0.490043	0.552806	0.910587	0.000170143	Ribo	Ribo exclusive	0.919195	0.00205348	0.45672	0.00330471	0.183835	0.659217	0.197292	0.282211	abundance
ENSMUSG00000035439	Haus8	-0.570512	0.212594	0.92096	0.0139126	0.350447	1	RNA	RNA exclusive	0.349683	0.211636	0.635061	0.121798	0.0974296	0.769456	0.295647	0.495198	background
ENSMUSG00000029648	Flt1	0.538977	0.212616	-0.590862	0.340175	-0.051885	1	Unchanged		-0.0759306	0.817354	-0.661328	0.00436923	0.290888	0.564184	-0.643566	0.0177428	buffering
ENSMUSG00000079614	Seh1l	-0.377629	0.213008	-0.0620929	1	-0.439722	0.491917	Unchanged		-0.426819	0.0389493	-0.0860331	0.612039	-0.438008	0.0666759	-0.131105	0.61547	background
ENSMUSG00000000149	Gna12	-0.386757	0.213526	-0.0519684	1	-0.438726	0.396629	Unchanged		-0.480794	0.0397875	-0.103519	0.527808	-0.42515	0.102858	0.0161491	0.950318	background
ENSMUSG00000005823	Gpr108	-0.411884	0.213526	0.146595	1	-0.265289	1	Unchanged		-0.2811	0.243648	-0.0988811	0.80162	-0.299816	0.265631	-0.254997	0.585097	background
ENSMUSG00000024621	Csf1r	0.473775	0.213526	0.924448	0.00142367	1.39822	5.51293e-09	RNA+Ribo	concordant (fwd)	1.33229	9.40785e-05	0.812769	0.00230107	1.43449	0.00465892	0.97669	0.107597	translation
ENSMUSG00000029179	Zcchc4	0.663318	0.213526	-0.329066	1	0.334252	1	Unchanged		0.243965	0.533298	-0.38469	0.0185523	0.512812	0.415159	-0.401883	0.0410886	buffering
ENSMUSG00000054469	Lclat1	0.585496	0.213668	0.0508059	1	0.636302	0.201174	Unchanged		0.611158	0.0620166	-0.151175	0.649375	0.642541	0.0909708	-0.270311	0.549426	background
ENSMUSG00000028426	Rad23b	-0.505322	0.213903	0.135673	1	-0.369649	0.984513	Unchanged		-0.398848	0.194894	-0.104985	0.797534	-0.364954	0.277534	0.0964342	0.851054	background
ENSMUSG00000037022	Mmaa	-0.429843	0.213903	-0.513822	0.484816	-0.943665	0.00012704	Ribo	Ribo exclusive	-0.983159	0.000436796	-0.723147	0.0264077	-1.12707	0.00249911	-1.30356	0.0853436	translation
ENSMUSG00000071369	Map3k5	0.611044	0.213903	-0.321603	1	0.289442	1	Unchanged		0.271524	0.440407	-0.429539	0.0603761	0.536113	0.235967	-0.490772	0.0694386	background
ENSMUSG00000008373	Prpf31	-0.448964	0.214128	0.244577	1	-0.204387	1	Unchanged		-0.277228	0.219512	0.0276048	0.941842	-0.282229	0.265044	0.171265	0.69665	background
ENSMUSG00000022685	Parn	0.587514	0.214688	-0.186151	1	0.401363	0.984592	Unchanged		0.196268	0.616759	-0.330784	0.171328	0.482188	0.261992	-0.389794	0.133953	background
ENSMUSG00000049553	Polr1a	0.460177	0.214688	0.0331582	1	0.493336	0.296421	Unchanged		0.523509	0.046139	0.01936	0.928379	0.509846	0.0664222	-0.170343	0.487422	background
ENSMUSG00000022533	Atp13a3	0.575209	0.214721	0.394936	1	0.970145	0.00620373	Ribo	Ribo exclusive	0.889232	0.0193356	0.279364	0.178815	0.790924	0.0905797	0.195726	0.533816	background
ENSMUSG00000008734	Gprc5b	0.649483	0.215386	0.677873	0.244601	1.32736	0.000250545	Ribo	Ribo exclusive	1.2817	0.000100537	0.547178	0.0519231	1.05815	0.00278442	-0.369381	0.586031	translation
ENSMUSG00000020089	Ppa1	-0.48183	0.215386	-0.0606131	1	-0.542444	0.329384	Unchanged		-0.631609	0.0572112	-0.0724951	0.655345	-0.547678	0.124749	0.034589	0.876686	background
ENSMUSG00000029580	Actb	0.706701	0.215386	1.06243	0.0206086	1.76913	9.82875e-08	RNA+Ribo	concordant (fwd)	1.66888	0.000132605	0.844931	0.0583485	1.42194	0.00404532	-0.133035	0.908819	translation
ENSMUSG00000033191	Tie1	0.631305	0.215386	0.357097	1	0.988403	0.0151728	Ribo	Ribo exclusive	0.979447	0.0130159	0.160775	0.651089	0.908937	0.0341262	-0.175404	0.748762	translation
ENSMUSG00000068036	Afdn	0.622464	0.215541	0.378672	1	1.00114	0.0120946	Ribo	Ribo exclusive	0.953392	0.0120716	0.25739	0.38166	0.724786	0.0367949	-0.264664	0.440013	translation
ENSMUSG00000026712	Mrc1	0.796159	0.215774	0.658717	0.547813	1.45488	0.000238537	Ribo	Ribo exclusive	1.34465	0.00138877	0.566878	0.0870687	0.844518	0.0143731	-0.426896	0.271202	translation
ENSMUSG00000055024	Ep300	0.48502	0.216395	-0.104267	1	0.380754	0.958506	Unchanged		0.285933	0.341386	-0.124234	0.534976	0.171555	0.596045	-0.0275246	0.909375	background
ENSMUSG00000019996	Map7	-0.489948	0.216661	-0.882651	0.0014098	-1.3726	2.52158e-08	RNA+Ribo	concordant (fwd)	-1.37422	0.000115551	-1.06212	0.00198774	-1.16136	0.0154246	-0.66503	0.369233	translation
ENSMUSG00000052921	Arhgef15	0.66448	0.21687	0.0895303	1	0.75401	0.125722	Unchanged		0.648644	0.0194801	-0.0492311	0.874491	0.65806	0.0373146	-0.205871	0.65745	translation
ENSMUSG00000026786	Apbb1ip	1.02627	0.217011	0.516119	1	1.54239	0.00707834	Ribo	Ribo exclusive	1.31184	0.00479244	0.37642	0.323341	1.13117	0.0262761	-0.0922033	0.892746	translation
ENSMUSG00000032422	Snx14	0.384468	0.218073	-0.188863	1	0.195605	1	Unchanged		0.176197	0.430067	-0.332191	0.166297	0.232446	0.392577	-0.380315	0.195675	background
ENSMUSG00000026896	Ifih1	0.619052	0.218427	0.310276	1	0.929328	0.0234265	Ribo	Ribo exclusive	0.877592	0.0106229	0.0888069	0.809659	0.845568	0.0250522	-0.268994	0.61886	translation
ENSMUSG00000004562	Arhgef40	0.761213	0.219254	1.08134	0.0191549	1.84255	1.51692e-07	RNA+Ribo	concordant (fwd)	1.99811	0.000359875	0.95434	0.00191253	1.73701	0.0438264	0.795656	0.137252	translation
ENSMUSG00000006906	Stambp	0.530918	0.219318	-0.272471	1	0.258447	1	Unchanged		0.249043	0.291113	-0.227501	0.305347	0.285795	0.309974	-0.269138	0.333835	background
ENSMUSG00000016495	Plgrkt	-0.71142	0.219318	0.16296	1	-0.54846	0.545454	Unchanged		-0.773623	0.0873058	0.302012	0.382673	-0.499548	0.250601	-0.0518135	0.901241	background
ENSMUSG00000021772	Nkiras1	-0.611831	0.219318	-0.356906	1	-0.968737	0.00378945	Ribo	Ribo exclusive	-1.07029	0.00609968	-0.310148	0.158799	-1.08226	0.0281505	-0.323554	0.374901	translation
ENSMUSG00000029392	Rilpl1	-0.562842	0.219407	-0.583206	0.576035	-1.14605	0.000506703	Ribo	Ribo exclusive	-1.20199	0.00282798	-0.64083	0.00151865	-0.134115	0.833154	-0.329391	0.140955	abundance
ENSMUSG00000038046	Mrm3	-0.429403	0.219407	-0.629213	0.0954931	-1.05862	3.4646e-06	Ribo	Ribo exclusive	-1.06436	0.000300913	-0.797033	0.00408136	-1.0451	0.0106207	-0.758558	0.209836	translation
ENSMUSG00000031229	Atrx	0.573909	0.219684	-0.399883	1	0.174026	1	Unchanged		0.0622361	0.877572	-0.439812	0.0188853	-0.385273	0.472946	-0.428547	0.0419029	buffering
ENSMUSG00000020422	Tns3	0.635389	0.219807	1.24304	3.17862e-05	1.87843	4.97686e-10	RNA+Ribo	concordant (fwd)	1.75141	0.000111282	1.19174	9.58597e-05	0.874032	0.283381	0.795107	0.0707611	abundance
ENSMUSG00000022377	Asap1	0.775719	0.219807	-0.50837	0.9787	0.267349	1	Unchanged		0.0476573	0.933793	-0.611559	0.00878201	0.0841818	0.931591	-0.611917	0.0298761	buffering
ENSMUSG00000031781	Ciapin1	-0.411909	0.219807	-0.834341	0.00545519	-1.24625	2.85215e-08	RNA+Ribo	concordant (fwd)	-1.26203	0.000157617	-0.944415	0.000603293	-0.783591	0.0826984	-0.445751	0.343136	abundance
ENSMUSG00000038388	Mpp6	0.502578	0.219807	0.0401092	1	0.542687	0.568984	Unchanged		0.695244	0.0496602	-0.0249511	0.886579	0.686198	0.0932598	0.00775821	0.9744	background
ENSMUSG00000038446	Cdc40	0.421197	0.219807	-0.346638	1	0.074559	1	Unchanged		0.0439708	0.872693	-0.354537	0.0333201	0.0929022	0.815559	-0.35688	0.071221	background
ENSMUSG00000093904	Tomm20	0.789891	0.220204	0.22054	1	1.01043	0.0546028	Unchanged		0.978718	0.0260663	0.231515	0.238735	1.04459	0.059164	0.275493	0.329489	background
ENSMUSG00000028894	Inpp5b	0.611277	0.220482	0.137007	1	0.748285	0.166784	Unchanged		0.669123	0.0142721	-0.0459491	0.882088	0.67885	0.0292775	-0.235909	0.61525	translation
ENSMUSG00000017707	Serinc3	0.435277	0.2205	-0.38885	1	0.0464278	1	Unchanged		-0.0103933	0.972003	-0.518147	0.10506	0.0333831	0.930176	-0.516694	0.170622	background
ENSMUSG00000024566	Atp9b	0.442975	0.2205	-0.0375377	1	0.405437	0.863393	Unchanged		0.33866	0.149296	-0.115968	0.464465	0.334144	0.233646	-0.110955	0.601732	background
ENSMUSG00000027087	Itgav	0.491035	0.2205	0.604098	0.214252	1.09513	1.92633e-05	Ribo	Ribo exclusive	1.06576	0.00105171	0.613541	0.0111017	1.21158	0.0098662	0.791189	0.0816205	translation
ENSMUSG00000032006	Pdgfd	0.647828	0.2205	-0.766133	0.0979147	-0.118304	1	Unchanged		-0.20405	0.475123	-0.741716	0.0253762	0.0630876	0.879397	-0.637939	0.0812922	background
ENSMUSG00000037813	D630003M21Rik	1.09859	0.2205	1.08676	0.103593	2.18535	3.1369e-05	Ribo	Ribo exclusive	2.16932	0.000228382	0.926158	0.0471951	1.79132	0.00830244	0.0668737	0.951706	translation
ENSMUSG00000053510	Nrd1	0.324201	0.2205	-0.372823	0.895019	-0.0486215	1	Unchanged		-0.0768146	0.729643	-0.467263	0.0134845	0.0474746	0.887041	-0.449101	0.0424035	buffering
ENSMUSG00000018965	Ywhah	-0.421837	0.220791	0.221055	1	-0.200781	1	Unchanged		-0.225932	0.257483	0.227753	0.302497	-0.25352	0.279976	0.281487	0.329936	background
ENSMUSG00000040850	Psme4	0.49513	0.220791	-0.258643	1	0.236488	1	Unchanged		0.166073	0.541611	-0.374461	0.116583	0.399641	0.17738	-0.462664	0.0700045	background
ENSMUSG00000013076	Amotl1	-0.39041	0.221497	0.378017	1	-0.0123925	1	Unchanged		-0.012308	0.966699	0.301132	0.0287088	-0.269797	0.504436	0.302805	0.0587297	background
ENSMUSG00000020775	Mrpl38	-0.471166	0.221497	-0.211285	1	-0.682451	0.0596866	Unchanged		-0.749735	0.00778055	-0.319621	0.0972183	-0.814684	0.0250522	-0.401291	0.205245	translation
ENSMUSG00000035623	Rsf1	0.42582	0.221497	-0.241546	1	0.184274	1	Unchanged		0.160301	0.480485	-0.289828	0.0919691	0.176532	0.559643	-0.295545	0.161188	background
ENSMUSG00000028809	Srrm1	0.604729	0.221734	-0.426716	1	0.178013	1	Unchanged		0.149997	0.633851	-0.466233	0.0392251	0.344565	0.41412	-0.496669	0.0627201	background
ENSMUSG00000006611	Hfe	-0.456645	0.221962	0.118387	1	-0.338258	1	Unchanged		-0.369585	0.132326	0.043732	0.809611	-0.350684	0.207051	-0.0222231	0.929721	background
ENSMUSG00000042106	Inka1	-0.920441	0.221962	0.756175	0.368938	-0.164266	1	Unchanged		-0.264133	0.443515	0.699736	0.0339065	-0.349996	0.483123	0.72735	0.0707904	background
ENSMUSG00000031536	Polb	-0.443303	0.222859	-0.167429	1	-0.610732	0.0857184	Unchanged		-0.558918	0.0245663	-0.414113	0.241523	-0.660743	0.0250839	-0.807048	0.125141	translation
ENSMUSG00000021096	Ppm1a	-0.353427	0.22368	-0.0484295	1	-0.401857	0.645299	Unchanged		-0.473777	0.0781801	-0.215369	0.390879	-0.53041	0.0951246	-0.3281	0.332201	background
ENSMUSG00000031393	Mecp2	-0.463601	0.224715	-0.2579	1	-0.721501	0.040806	Ribo	Ribo exclusive	-0.73593	0.0119246	-0.333566	0.065961	-0.469998	0.16407	-0.112411	0.675572	background
ENSMUSG00000024236	Svil	0.549356	0.22481	-0.269344	1	0.280013	1	Unchanged		0.204348	0.457272	-0.359439	0.120771	0.452228	0.129244	-0.46573	0.0609818	background
ENSMUSG00000025374	Nabp2	-0.576971	0.22481	-0.126119	1	-0.703089	0.099815	Unchanged		-0.7412	0.0165282	-0.207442	0.362685	-0.610828	0.0655955	0.0523488	0.884883	background
ENSMUSG00000028964	Park7	-0.403683	0.22481	0.140281	1	-0.263401	1	Unchanged		-0.314537	0.184959	0.0634249	0.642235	-0.224027	0.362997	-0.0221527	0.897526	background
ENSMUSG00000022913	Psmg1	-0.52305	0.225904	-0.1911	1	-0.714151	0.0723548	Unchanged		-0.657249	0.0296331	-0.336235	0.13407	-0.794258	0.0375486	-0.485648	0.132921	translation
ENSMUSG00000052397	Ezr	-0.40547	0.225904	-0.225933	1	-0.631403	0.0563365	Unchanged		-0.675119	0.00859776	-0.553037	0.266994	-0.754379	0.0137843	-1.1459	0.176348	translation
ENSMUSG00000052496	Pkdrej	0.616474	0.225904	-0.183048	1	0.433426	1	Unchanged		0.299477	0.360692	-0.117046	0.578393	0.335192	0.38441	-0.147045	0.566921	background
ENSMUSG00000037400	Atp11b	0.617072	0.225969	-0.274623	1	0.342449	1	Unchanged		0.130287	0.761978	-0.597567	0.226383	0.294497	0.55361	-0.649513	0.240413	background
ENSMUSG00000039910	Cited2	-0.57699	0.225969	-0.623592	0.500977	-1.20058	3.10051e-05	Ribo	Ribo exclusive	-1.27156	0.000496246	-0.709122	0.00484706	-0.869267	0.0595714	-0.306495	0.480983	abundance
ENSMUSG00000014329	Bicc1	0.623231	0.226069	1.1293	2.67898e-05	1.75253	1.08268e-07	RNA+Ribo	concordant (fwd)	1.53857	0.000103475	0.948366	0.0027524	1.00238	0.0274153	0.135143	0.836817	translation
ENSMUSG00000066152	Slc31a2	0.626416	0.227003	-0.307101	1	0.319315	1	Unchanged		0.262387	0.399745	-0.294475	0.11562	0.484445	0.20039	-0.354671	0.103738	background
ENSMUSG00000022897	Dyrk1a	-0.384219	0.227758	-0.409058	1	-0.793277	0.00124931	Ribo	Ribo exclusive	-0.848866	0.00460594	-0.61874	0.0541204	-0.758296	0.041549	-0.423499	0.457962	translation
ENSMUSG00000024970	Spindoc	-0.501547	0.228151	-0.0772677	1	-0.578815	0.517625	Unchanged		-0.445282	0.0942035	-0.0445682	0.831931	-0.422347	0.150615	0.0682189	0.808148	background
ENSMUSG00000039065	Fam173b	-0.764041	0.228151	0.0340293	1	-0.730011	0.33535	Unchanged		-0.794016	0.0222837	0.212152	0.630221	-0.851214	0.0311743	0.556577	0.363016	translation
ENSMUSG00000021182	Ccdc88c	1.12315	0.228442	0.817365	0.586962	1.94052	0.00143615	Ribo	Ribo exclusive	1.84167	0.00363821	0.771835	0.083088	1.67665	0.034378	0.556361	0.467373	translation
ENSMUSG00000027531	Impa1	-0.491029	0.228442	0.44361	0.997603	-0.0474196	1	Unchanged		-0.0749843	0.8313	0.313868	0.121726	-0.419157	0.211397	0.342744	0.0898555	background
ENSMUSG00000030654	Arl6ip1	0.511481	0.228442	0.564687	0.392553	1.07617	0.000309718	Ribo	Ribo exclusive	1.09362	0.00104341	0.408938	0.081434	1.08515	0.0098662	0.39234	0.412032	translation
ENSMUSG00000036368	Rmdn2	0.635774	0.229331	-0.357887	1	0.277887	1	Unchanged		0.126883	0.769518	-0.478944	0.0171644	0.428119	0.506805	-0.491988	0.0381409	buffering
ENSMUSG00000023939	Mrpl14	-0.578626	0.230127	-0.510381	0.895896	-1.08901	0.000275978	Ribo	Ribo exclusive	-1.06647	0.00364592	-0.47588	0.0276992	-0.740182	0.100096	-0.219191	0.517566	abundance
ENSMUSG00000025871	4833439L19Rik	-0.720161	0.230127	-0.0624691	1	-0.78263	0.180718	Unchanged		-0.985028	0.0079476	-0.288008	0.392524	-0.906257	0.0317918	-0.0394229	0.950318	translation
ENSMUSG00000024583	Txnl1	-0.358564	0.230214	-0.16469	1	-0.523254	0.136365	Unchanged		-0.530464	0.00863433	-0.295677	0.230283	-0.51982	0.027411	-0.224007	0.680007	translation
ENSMUSG00000048482	Bdnf	-0.787136	0.230727	1.27235	0.00104149	0.485217	0.873333	RNA	RNA exclusive	0.4513	0.234985	1.43	0.00162294	-0.475148	0.409756	1.16106	0.0144005	buffering
ENSMUSG00000007613	Tgfbr1	0.667823	0.23097	0.458649	1	1.12647	0.00804272	Ribo	Ribo exclusive	0.91166	0.00834007	0.2558	0.446033	0.839617	0.0308169	-0.0196786	0.973776	translation
ENSMUSG00000026222	Sp100	0.993048	0.23097	0.128105	1	1.12115	0.0556589	Unchanged		0.749399	0.284881	-0.0697432	0.865037	0.854969	0.135035	-0.334732	0.306815	background
ENSMUSG00000068015	Lrch1	0.501541	0.23097	-0.780074	0.0105504	-0.278533	1	RNA	RNA exclusive	-0.286195	0.336665	-0.987377	0.00850644	-0.00561469	0.991907	-0.8711	0.0437658	buffering
ENSMUSG00000033953	Ppp3r1	0.435372	0.231296	-0.212336	1	0.223037	1	Unchanged		0.234969	0.314497	-0.393417	0.153566	0.196008	0.507546	-0.350416	0.319427	background
ENSMUSG00000045917	Tmem268	0.738612	0.231296	-0.21292	1	0.525692	0.785987	Unchanged		0.588886	0.17262	-0.231302	0.136718	0.852094	0.133009	-0.282949	0.140301	background
ENSMUSG00000024097	Srsf7	0.495421	0.231752	-0.131703	1	0.363717	1	Unchanged		0.323178	0.207081	-0.148488	0.425937	0.440279	0.109499	-0.271142	0.190972	background
ENSMUSG00000011960	Ccnt1	0.414045	0.231973	-0.260513	1	0.153532	1	Unchanged		0.136611	0.569963	-0.471383	0.150576	0.186369	0.532571	-0.509262	0.195963	background
ENSMUSG00000020952	Scfd1	0.475796	0.231973	0.027918	1	0.503714	0.491625	Unchanged		0.461518	0.115238	-0.00856185	0.967794	0.468194	0.140438	-0.114483	0.616944	background
ENSMUSG00000028348	Cavin4	-0.383388	0.23232	-0.0919427	1	-0.475331	0.435123	Unchanged		-0.501983	0.033667	-0.242511	0.301894	-0.400146	0.120097	0.0266022	0.944075	background
ENSMUSG00000024030	Abcg1	0.640463	0.23271	0.862867	0.0209835	1.50333	1.91134e-05	RNA+Ribo	concordant (fwd)	1.42331	7.10471e-05	0.745515	0.00807346	1.27322	0.00526013	0.395953	0.584992	translation
ENSMUSG00000036529	Sbf1	0.635025	0.23271	0.237248	1	0.872273	0.0374433	Ribo	Ribo exclusive	0.895392	0.0275165	0.109501	0.647809	0.853852	0.0671895	0.0153043	0.968066	background
ENSMUSG00000020577	Tspan13	0.747091	0.23296	0.438551	1	1.18564	0.00430609	Ribo	Ribo exclusive	1.06326	0.0110442	0.145432	0.762069	1.00103	0.0236919	-0.427363	0.511181	translation
ENSMUSG00000027953	Slc50a1	0.73193	0.23296	0.662973	0.548217	1.3949	0.0002738	Ribo	Ribo exclusive	1.21382	0.00468892	0.5097	0.0319858	1.82559	0.00203036	0.938061	0.0137857	translation
ENSMUSG00000029141	Slc4a1ap	0.363291	0.23296	-0.228559	1	0.134732	1	Unchanged		0.175923	0.501388	-0.186048	0.259556	0.146019	0.668024	-0.175996	0.38212	background
ENSMUSG00000041624	Gucy1a2	0.913219	0.23296	-0.130332	1	0.782887	0.504998	Unchanged		0.381412	0.484531	-0.0417855	0.918772	0.350425	0.547936	0.0683959	0.879839	background
ENSMUSG00000045160	Bola3	0.528478	0.23296	-0.650067	0.228308	-0.121589	1	Unchanged		-0.0736827	0.830289	-0.611089	0.00736641	0.451504	0.308677	-0.586436	0.019574	buffering
ENSMUSG00000002395	Use1	-0.374305	0.23303	-0.0111857	1	-0.385491	0.860994	Unchanged		-0.408506	0.0738182	-0.440538	0.514392	-0.45222	0.0817063	-0.94644	0.302918	background
ENSMUSG00000024507	Hsd17b4	0.260819	0.23303	-0.367574	0.96199	-0.106756	1	Unchanged		-0.134231	0.474687	-0.335966	0.0519851	0.0742322	0.733825	-0.209119	0.198958	background
ENSMUSG00000029621	Arpc1a	-0.426804	0.23303	0.116492	1	-0.310312	0.978141	Unchanged		-0.270639	0.326123	0.151716	0.345247	-0.223544	0.514891	0.129743	0.517241	background
ENSMUSG00000024335	Brd2	0.506162	0.233327	0.00232742	1	0.508489	0.464552	Unchanged		0.403336	0.22198	-0.0895257	0.615015	0.509687	0.140904	-0.182536	0.3461	background
ENSMUSG00000031980	Agt	-0.744054	0.234742	-2.9206	1.41925e-23	-3.66465	7.03651e-36	RNA+Ribo	concordant (fwd)	-3.64182	1.35582e-06	-2.831	9.08984e-06	-1.55831	0.0895339	-0.545728	0.623685	abundance
ENSMUSG00000025488	Cox8b	-0.485437	0.235801	-0.464545	0.929107	-0.949981	0.00294733	Ribo	Ribo exclusive	-0.911387	0.00686415	-0.575358	0.0155656	-0.744058	0.111001	-0.447824	0.217231	abundance
ENSMUSG00000025236	Adpgk	0.736348	0.236002	0.163458	1	0.899806	0.0776486	Unchanged		0.804565	0.0404444	0.0460619	0.868196	0.775013	0.0703838	-0.139221	0.694941	background
ENSMUSG00000027185	Nat10	0.459281	0.236002	0.0631232	1	0.522405	0.365813	Unchanged		0.509351	0.0611043	-0.154838	0.666011	0.523126	0.097938	-0.237478	0.645335	background
ENSMUSG00000038855	Itpkb	0.601991	0.236002	-0.129588	1	0.472403	0.735191	Unchanged		0.450027	0.16975	-0.189164	0.449279	0.442434	0.26325	-0.180094	0.587353	background
ENSMUSG00000060012	Kif13b	0.632959	0.236002	0.120608	1	0.753566	0.135788	Unchanged		0.688398	0.11645	0.0756525	0.709352	0.753963	0.127498	0.157518	0.522132	background
ENSMUSG00000033306	Lpp	0.694631	0.23711	0.371123	1	1.06575	0.00606566	Ribo	Ribo exclusive	0.953175	0.0301756	0.248779	0.298097	0.545813	0.105079	-0.143138	0.521197	background
ENSMUSG00000069539	Scyl2	0.503514	0.237167	0.0658394	1	0.569354	0.271863	Unchanged		0.588321	0.0455112	-0.0133274	0.955525	0.599536	0.0509711	-0.222008	0.36798	background
ENSMUSG00000001504	Irx2	-0.573049	0.237217	-0.184669	1	-0.757717	0.122332	Unchanged		-0.739446	0.0134842	-0.163309	0.451148	-0.690521	0.0449371	-0.0441839	0.907338	translation
ENSMUSG00000032624	Eml4	0.740936	0.237782	0.441978	0.971507	1.18291	0.0184451	Ribo	Ribo exclusive	0.942001	0.0752397	0.516197	0.0520687	1.53086	0.0287538	0.728953	0.033461	translation
ENSMUSG00000078789	Dph1	0.559499	0.238283	0.0889718	1	0.648471	0.209831	Unchanged		0.622553	0.0473563	0.17891	0.451178	0.492804	0.133179	-0.0575142	0.862293	background
ENSMUSG00000003031	Cdkn1b	-0.45717	0.238318	-0.130702	1	-0.587872	0.173016	Unchanged		-0.614169	0.020311	-0.322592	0.253607	-0.697275	0.0290558	-0.552715	0.198772	translation
ENSMUSG00000043257	Pigv	0.726065	0.238318	0.302096	1	1.02816	0.0404894	Ribo	Ribo exclusive	0.984874	0.0241933	0.383714	0.116553	0.751221	0.158629	0.216252	0.538502	background
ENSMUSG00000001333	Sync	-0.537083	0.239184	0.0822759	1	-0.454807	0.519753	Unchanged		-0.51799	0.0783606	-0.114536	0.756613	-0.565282	0.0714996	-0.430656	0.309313	background
ENSMUSG00000046792	Zfp787	-0.465598	0.239184	-0.0948799	1	-0.560478	0.267154	Unchanged		-0.588621	0.0225386	-0.263161	0.304146	-0.731469	0.0128232	-0.653321	0.0575418	translation
ENSMUSG00000071342	Lsmem1	-0.987804	0.239184	0.244226	1	-0.743578	0.573933	Unchanged		-1.05342	0.0583339	0.46925	0.395813	-1.18161	0.0738997	0.720827	0.330259	background
ENSMUSG00000041560	Nop53	-0.436619	0.239205	-0.329651	1	-0.76627	0.0105738	Ribo	Ribo exclusive	-0.814427	0.00383381	-0.5107	0.084588	-0.947801	0.00888642	-0.863108	0.103904	translation
ENSMUSG00000018171	Vmp1	-0.369363	0.239653	-0.0640152	1	-0.433379	0.503973	Unchanged		-0.490112	0.0483727	-0.117189	0.425735	-0.461232	0.116493	-0.0848112	0.691675	background
ENSMUSG00000021273	Fdft1	-0.70745	0.239679	-0.361314	1	-1.06876	0.0192957	Ribo	Ribo exclusive	-1.22103	0.00443697	-0.294871	0.34237	-1.3876	0.00695099	-0.69238	0.148238	translation
ENSMUSG00000052459	Atp6v1a	0.476989	0.24053	0.320592	1	0.79758	0.0207899	Ribo	Ribo exclusive	0.817862	0.00955367	0.218931	0.253607	0.647551	0.0570864	-0.0191123	0.952325	background
ENSMUSG00000003402	Prkcsh	-0.352005	0.240736	0.101711	1	-0.250294	1	Unchanged		-0.274879	0.167648	-0.0639866	0.809285	-0.277393	0.226464	-0.0906432	0.812924	background
ENSMUSG00000023460	Rab12	-0.375184	0.240736	-0.548343	0.30416	-0.923527	0.000206659	Ribo	Ribo exclusive	-0.937911	0.00146557	-0.874333	0.0821651	-1.06833	0.00452068	-1.62051	0.111694	translation
ENSMUSG00000024397	Aif1	1.2065	0.240736	1.70862	0.000303521	2.91513	8.3444e-06	RNA+Ribo	concordant (fwd)	2.72673	3.88077e-05	1.89224	0.00109687	2.22284	0.01444	1.10972	0.372621	translation
ENSMUSG00000024740	Ddb1	0.315697	0.240736	0.00380114	1	0.319498	0.863533	Unchanged		0.27252	0.196543	-0.167167	0.598534	0.307602	0.191327	-0.352697	0.361724	background
ENSMUSG00000026768	Itga8	1.01663	0.240736	0.412855	1	1.42948	0.0057423	Ribo	Ribo exclusive	1.17808	0.00897323	0.257311	0.393296	0.893508	0.0230938	-0.325645	0.330055	translation
ENSMUSG00000027498	Cstf1	-0.388526	0.240736	0.0946431	1	-0.293882	1	Unchanged		-0.313759	0.126571	-0.0760402	0.786159	-0.301939	0.195183	0.0464205	0.909923	background
ENSMUSG00000028898	Trnau1ap	-0.537884	0.240736	-0.0734767	1	-0.611361	0.270449	Unchanged		-0.672802	0.0516049	-0.241602	0.361705	-0.695693	0.0964503	-0.275955	0.458708	background
ENSMUSG00000030301	Ccdc91	-0.427615	0.240736	-0.185575	1	-0.61319	0.122572	Unchanged		-0.641896	0.0177767	-0.424037	0.209723	-0.612789	0.0598186	-0.333301	0.555463	background
ENSMUSG00000033149	Phldb2	0.771701	0.240736	0.493861	1	1.26556	0.00378945	Ribo	Ribo exclusive	1.05137	0.0219502	0.409248	0.182217	0.665664	0.14505	-0.0135261	0.9744	background
ENSMUSG00000039126	Prune2	0.86497	0.240736	-0.217155	1	0.647815	0.433701	Unchanged		0.734846	0.142005	-0.347784	0.266825	1.18086	0.0164557	-0.655146	0.0372656	translation
ENSMUSG00000041303	Gtf3c3	0.416087	0.240736	-0.0948815	1	0.321205	1	Unchanged		0.288481	0.195724	-0.105222	0.503016	0.248872	0.34142	-0.0575572	0.791853	background
ENSMUSG00000046756	Mrps7	-0.485658	0.240736	-0.149893	1	-0.635551	0.191927	Unchanged		-0.725943	0.0255153	-0.294334	0.184725	-0.976732	0.0116004	-0.576342	0.0507445	translation
ENSMUSG00000048076	Arf1	-0.479869	0.240736	-0.180314	1	-0.660184	0.0739742	Unchanged		-0.619634	0.0195954	-0.272548	0.155957	-0.624364	0.0599843	-0.278667	0.351816	background
ENSMUSG00000064210	Ano6	0.434898	0.240736	0.0385445	1	0.473442	0.612958	Unchanged		0.462575	0.14113	0.0394932	0.786845	0.530828	0.103456	0.118987	0.453393	background
ENSMUSG00000059970	Hspa2	-0.519038	0.240987	0.57854	0.446686	0.0595022	1	Unchanged		0.0456342	0.888581	0.612393	0.0120108	-0.0114837	0.983027	0.610035	0.0358439	buffering
ENSMUSG00000006289	Osgep	-0.449197	0.241942	-0.254644	1	-0.703841	0.0407739	Ribo	Ribo exclusive	-0.717828	0.00686415	-0.418986	0.106827	-0.759291	0.0228351	-0.517467	0.260347	translation
ENSMUSG00000025492	Ifitm3	-0.653553	0.241942	0.536593	1	-0.116961	1	Unchanged		-0.255282	0.527977	0.409676	0.0943965	-0.637918	0.166016	0.486135	0.0694386	background
ENSMUSG00000034247	Plekhm1	0.614795	0.241942	0.242038	1	0.856833	0.0504757	Unchanged		1.04769	0.0251481	0.0441493	0.900977	1.06306	0.0470865	0.200925	0.679637	translation
ENSMUSG00000038510	Rpf2	-0.743575	0.241958	0.31838	1	-0.425195	1	Unchanged		-0.404867	0.290129	0.478628	0.243138	-0.0724932	0.854037	0.167244	0.662931	background
ENSMUSG00000017754	Pltp	0.501693	0.24255	0.217421	1	0.719115	0.0415276	Ribo	Ribo exclusive	0.700039	0.0137608	0.18809	0.391153	0.694222	0.0387171	0.173899	0.633266	translation
ENSMUSG00000032582	Rbm6	0.494629	0.243274	-0.409266	0.971615	0.0853627	1	Unchanged		-0.0180426	0.949725	-0.525629	0.0203176	-0.468836	0.102553	-0.536927	0.0183186	buffering
ENSMUSG00000035585	Tsen34	-0.539966	0.243274	0.115866	1	-0.424099	0.802858	Unchanged		-0.487043	0.0620166	-0.0709621	0.821564	-0.536088	0.0245104	-0.548817	0.0431125	translation
ENSMUSG00000043284	Tmem11	-0.664575	0.24348	-0.0087674	1	-0.673343	0.211394	Unchanged		-0.766675	0.0203214	-0.171453	0.529537	-0.87355	0.0172771	-0.49168	0.166054	translation
ENSMUSG00000024943	Smc5	0.506516	0.243732	-0.231983	1	0.274533	1	Unchanged		0.269893	0.349245	-0.353308	0.148081	0.343824	0.346192	-0.394633	0.190308	background
ENSMUSG00000030231	Plekha5	-0.404299	0.243732	-0.612595	0.04168	-1.01689	5.81642e-05	RNA+Ribo	concordant (fwd)	-1.02775	0.000141589	-0.636024	0.00162294	-1.11271	0.00550668	-0.767597	0.0954547	translation
ENSMUSG00000039968	Rsbn1l	0.650199	0.24395	-0.380431	1	0.269768	1	Unchanged		0.204683	0.508461	-0.259734	0.477316	0.227679	0.540774	-0.2861	0.5184	background
ENSMUSG00000029765	Plxna4	0.580214	0.243981	-0.0310212	1	0.549193	0.468216	Unchanged		0.411046	0.171907	-0.0765704	0.750076	0.41449	0.2399	-0.0860562	0.793689	background
ENSMUSG00000051359	Ncald	-0.78917	0.243981	0.273994	1	-0.515176	1	Unchanged		-0.782799	0.0570165	0.325211	0.287908	-0.905979	0.0693922	0.47249	0.24883	background
ENSMUSG00000004460	Dnajb11	-0.435072	0.244176	0.342753	1	-0.0923189	1	Unchanged		-0.0717637	0.773356	0.35095	0.111701	-0.11535	0.718046	0.360814	0.169272	background
ENSMUSG00000024331	Dsc2	0.324533	0.244176	-0.562969	0.098741	-0.238436	1	Unchanged		-0.293525	0.167155	-0.587608	0.00174349	-0.44667	0.2336	-0.63103	0.0137857	buffering
ENSMUSG00000015846	Rxra	-0.533881	0.244197	0.108789	1	-0.425092	0.783876	Unchanged		-0.453392	0.110326	-0.165255	0.716279	-0.47252	0.149109	-0.300205	0.622925	background
ENSMUSG00000020022	Ndufa12	-0.538989	0.244197	-0.63878	0.407807	-1.17777	0.000295323	Ribo	Ribo exclusive	-1.16955	0.00186565	-0.746682	0.0057666	-1.0604	0.0545198	-0.657199	0.143902	abundance
ENSMUSG00000032534	Cep63	-0.37477	0.244197	-0.317988	1	-0.692757	0.0262058	Ribo	Ribo exclusive	-0.760967	0.00352544	-0.342482	0.0253789	-0.979936	0.00913486	-0.511912	0.0443299	translation
ENSMUSG00000071654	Uqcc3	-0.690109	0.244197	0.176135	1	-0.513974	0.761218	Unchanged		-0.682115	0.0621812	0.162769	0.495201	-0.741731	0.0855537	0.24979	0.430044	background
ENSMUSG00000016833	Mrps18c	-0.567438	0.245698	-0.062899	1	-0.630337	0.202058	Unchanged		-0.692722	0.0519409	-0.0527566	0.804342	-0.749799	0.0447923	-0.236703	0.321142	translation
ENSMUSG00000024193	Phf1	0.644414	0.245698	-0.00205164	1	0.642362	0.336403	Unchanged		0.5259	0.0928099	-0.00297719	0.991405	0.527531	0.126676	-0.121302	0.675572	background
ENSMUSG00000029534	St7	0.474398	0.245698	-0.273148	1	0.201249	1	Unchanged		0.251455	0.33271	-0.462701	0.113426	0.234266	0.490581	-0.448694	0.222159	background
ENSMUSG00000054414	Slc30a7	0.598017	0.245698	0.376578	1	0.974595	0.0333547	Ribo	Ribo exclusive	0.879515	0.00868067	0.234305	0.28288	0.719492	0.0470573	-0.0330165	0.929721	translation
ENSMUSG00000041733	Coq5	-0.449535	0.245777	-0.433107	0.875108	-0.882642	0.000813144	Ribo	Ribo exclusive	-0.933041	0.00123734	-0.388288	0.0912526	-0.644367	0.014981	0.345772	0.282036	translation
ENSMUSG00000020135	Apc2	0.735368	0.246153	0.891697	0.0829326	1.62707	3.16304e-05	Ribo	Ribo exclusive	1.6221	5.25148e-05	0.651392	0.112471	1.62996	0.000849501	0.703501	0.567202	translation
ENSMUSG00000005354	Txn2	-0.389225	0.246398	-0.700364	0.0174782	-1.08959	1.51692e-07	RNA+Ribo	concordant (fwd)	-1.10244	0.000100949	-0.723	0.00156382	-0.720116	0.0232082	-0.01983	0.970373	translation
ENSMUSG00000029994	Anxa4	-0.57188	0.246618	0.906234	0.0284521	0.334354	1	RNA	RNA exclusive	0.170251	0.664391	0.87759	0.000221468	-0.271201	0.803785	0.865919	0.00585962	buffering
ENSMUSG00000043241	Upf2	0.539819	0.246618	0.0869327	1	0.626752	0.262884	Unchanged		0.603787	0.0444753	0.0614369	0.771273	0.645751	0.0515407	0.221238	0.395338	background
ENSMUSG00000001786	Fbxo7	0.477718	0.246761	-0.168859	1	0.308859	1	Unchanged		0.284532	0.201575	-0.0505055	0.871106	0.302004	0.203892	-0.261799	0.424952	background
ENSMUSG00000028868	Wasf2	0.453196	0.246761	-0.162135	1	0.291061	1	Unchanged		0.22177	0.391773	-0.369747	0.240865	0.379532	0.166487	-0.539202	0.106518	background
ENSMUSG00000049327	Kmt5a	-0.483227	0.246761	-0.0583083	1	-0.541536	0.225192	Unchanged		-0.597396	0.0368245	-0.399075	0.471919	-0.697589	0.0278858	-1.05582	0.135525	translation
ENSMUSG00000026234	Ncl	0.458777	0.246885	-0.650201	0.227129	-0.191424	1	Unchanged		-0.191181	0.48319	-0.770964	0.00743043	0.00527561	0.991907	-0.720943	0.0340086	buffering
ENSMUSG00000031985	Gnpat	0.372123	0.24727	-0.240842	1	0.131281	1	Unchanged		0.0883147	0.718616	-0.309717	0.0338005	0.199651	0.56892	-0.319131	0.0664367	background
ENSMUSG00000042502	Cd2bp2	-0.37945	0.248324	0.266587	1	-0.112864	1	Unchanged		-0.120475	0.616474	0.232087	0.0458336	0.0721812	0.863054	0.222064	0.106195	background
ENSMUSG00000067150	Xpo5	0.372436	0.248324	0.315245	1	0.687681	0.0162067	Ribo	Ribo exclusive	0.669992	0.0117844	0.13715	0.641133	0.605639	0.0278858	-0.33491	0.397605	translation
ENSMUSG00000009291	Pttg1ip	-0.322523	0.248459	-0.009362	1	-0.331885	1	Unchanged		-0.334099	0.110326	-0.0515612	0.683173	-0.304605	0.20415	-0.0135841	0.939157	background
ENSMUSG00000027363	Usp8	-0.450507	0.248459	-0.116136	1	-0.566642	0.162984	Unchanged		-0.703839	0.0472733	-0.233722	0.206261	-0.415464	0.274329	-0.0473393	0.850584	background
ENSMUSG00000033287	Kctd17	0.724291	0.248459	0.684128	0.37688	1.40842	0.000253951	Ribo	Ribo exclusive	1.29349	0.000519329	0.576326	0.0249416	1.28536	0.00987524	0.564011	0.283291	translation
ENSMUSG00000042426	Dhx29	0.398017	0.248459	0.0661566	1	0.464174	0.478816	Unchanged		0.42355	0.0906289	-0.0656039	0.782893	0.415641	0.149639	-0.022602	0.950318	background
ENSMUSG00000046010	Zfp830	-0.550465	0.248459	-0.201643	1	-0.752108	0.0938211	Unchanged		-0.807786	0.0076458	-0.0334909	0.934879	-0.8031	0.0204896	0.172835	0.798387	translation
ENSMUSG00000010045	Tmem115	-0.583025	0.24849	0.329758	1	-0.253267	1	Unchanged		-0.260859	0.423057	0.289804	0.104483	-0.285334	0.525146	0.295027	0.176744	background
ENSMUSG00000030199	Etv6	-0.493405	0.24849	0.568697	0.298355	0.0752917	1	Unchanged		0.00898135	0.981081	0.628852	0.00886708	0.260303	0.626372	0.630361	0.0276986	buffering
ENSMUSG00000033487	Fndc3a	0.577599	0.248655	-0.0144172	1	0.563182	0.444283	Unchanged		0.360656	0.410333	-0.298127	0.500963	0.452598	0.369269	-0.399164	0.435008	background
ENSMUSG00000030407	Qpctl	0.824153	0.248739	0.507357	1	1.33151	0.0075328	Ribo	Ribo exclusive	1.23064	0.0106008	0.523432	0.0166302	0.739934	0.268589	0.34121	0.247286	abundance
ENSMUSG00000005871	Apc	0.583275	0.248796	-0.0743263	1	0.508949	0.591369	Unchanged		0.462324	0.253669	-0.201306	0.382966	0.650002	0.142782	-0.311963	0.226538	background
ENSMUSG00000001441	Npepps	0.422882	0.24892	-0.131842	1	0.29104	1	Unchanged		0.296195	0.18693	-0.408012	0.337868	0.309016	0.247553	-0.455508	0.425072	background
ENSMUSG00000041685	Fcho2	0.536012	0.24892	-0.279672	1	0.25634	1	Unchanged		0.198285	0.557298	-0.276282	0.190483	0.0514103	0.910961	-0.238975	0.332201	background
ENSMUSG00000044791	Setd2	0.534895	0.24892	-0.294122	1	0.240773	1	Unchanged		0.144679	0.70606	-0.379053	0.0413464	0.30574	0.580507	-0.390396	0.0776104	background
ENSMUSG00000064145	Arih2	-0.489673	0.249774	0.00662457	1	-0.483048	0.578772	Unchanged		-0.584564	0.140021	0.016344	0.927985	-0.596893	0.185591	0.0599785	0.789053	background
ENSMUSG00000072946	Ptgr2	-0.426024	0.250417	-0.350877	1	-0.7769	0.0052766	Ribo	Ribo exclusive	-0.789857	0.00995286	-0.48373	0.0282318	-0.769961	0.0680515	-0.466598	0.176744	abundance
ENSMUSG00000034910	Pygo1	-0.844745	0.251083	-0.454229	0.902867	-1.29897	0.00409456	Ribo	Ribo exclusive	-1.15732	0.00285632	-0.2984	0.389756	-0.983171	0.0120904	0.376556	0.465901	translation
ENSMUSG00000004565	Pnpla6	0.785735	0.251581	0.268716	1	1.05445	0.0173213	Ribo	Ribo exclusive	1.10126	0.0114184	0.0854921	0.791421	1.10118	0.0296998	0.0850061	0.875741	translation
ENSMUSG00000028430	Nol6	0.450224	0.251581	0.221501	1	0.671725	0.047159	Ribo	Ribo exclusive	0.617546	0.0228015	0.192189	0.117901	0.18581	0.519116	0.040227	0.80072	background
ENSMUSG00000014601	Strip1	0.372601	0.25336	0.218649	1	0.59125	0.0928229	Unchanged		0.630402	0.0167898	0.109685	0.570031	0.540899	0.0428427	-0.171072	0.488584	translation
ENSMUSG00000028108	Ecm1	0.520631	0.253524	0.599692	0.508358	1.12032	0.000681322	Ribo	Ribo exclusive	1.12084	0.00163308	0.28233	0.566746	1.1045	0.00790441	0.105241	0.923258	translation
ENSMUSG00000040562	Gstm2	-0.582051	0.253524	-0.619499	0.605101	-1.20155	8.92502e-05	Ribo	Ribo exclusive	-1.27892	0.00195944	-0.677147	0.000845663	-1.22492	0.126099	-0.663275	0.0287895	abundance
ENSMUSG00000021806	Nid2	0.639968	0.254007	0.857823	0.0878629	1.49779	7.34629e-06	Ribo	Ribo exclusive	1.4387	0.000129048	0.63045	0.0968765	1.17797	0.0025241	-0.671967	0.393156	translation
ENSMUSG00000032228	Tcf12	0.394542	0.254007	0.0636187	1	0.45816	0.521947	Unchanged		0.361582	0.247122	0.013287	0.922521	0.359785	0.324921	0.0104607	0.951638	background
ENSMUSG00000054452	Aes	-0.391853	0.254142	-0.348095	1	-0.739947	0.00511232	Ribo	Ribo exclusive	-0.802318	0.00312616	-0.461546	0.0258287	-1.18032	0.00117871	-0.964266	0.00819003	translation
ENSMUSG00000035840	Lysmd3	-0.806889	0.25519	-0.131158	1	-0.938047	0.117548	Unchanged		-1.17831	0.0614308	-0.208923	0.242914	-1.49455	0.0559352	-0.302938	0.184684	background
ENSMUSG00000062980	Cped1	0.691558	0.25519	-0.142466	1	0.549091	0.655573	Unchanged		0.164328	0.78918	-0.196403	0.212682	0.20295	0.810004	-0.197825	0.292945	background
ENSMUSG00000022105	Rb1	0.459238	0.25524	-0.162227	1	0.29701	1	Unchanged		0.122863	0.726451	-0.284978	0.144074	0.18758	0.685662	-0.292891	0.206231	background
ENSMUSG00000025068	Gsto1	-0.488458	0.25664	-0.0645653	1	-0.553023	0.20299	Unchanged		-0.519596	0.0746686	-0.204969	0.390836	-0.397573	0.209505	-0.00670935	0.983134	background
ENSMUSG00000047242	Taf9b	-0.484666	0.25664	0.0647199	1	-0.419946	0.799915	Unchanged		-0.525618	0.0920858	0.0451839	0.78197	-0.54846	0.126676	0.0859912	0.678364	background
ENSMUSG00000049588	Ccdc69	-0.748872	0.25664	0.616685	0.573642	-0.132187	1	Unchanged		-0.0792721	0.827161	0.597441	0.0402317	-0.498121	0.192519	0.637845	0.0358439	buffering
ENSMUSG00000038910	Plcl2	0.62798	0.256788	0.34854	1	0.97652	0.014854	Ribo	Ribo exclusive	0.915323	0.00609968	0.295179	0.0387134	1.10624	0.0257779	0.368349	0.0834226	translation
ENSMUSG00000040383	Aqr	0.389179	0.257432	-0.006548	1	0.382631	0.619662	Unchanged		0.376543	0.0967609	-0.346345	0.511441	0.458765	0.0532394	-1.02491	0.078524	background
ENSMUSG00000032171	Pin1	-0.475189	0.257737	-0.0203767	1	-0.495566	0.47127	Unchanged		-0.529601	0.0677972	-0.0623249	0.709352	-0.54692	0.105335	-0.0949705	0.674109	background
ENSMUSG00000028060	Khdc4	-0.494098	0.257822	-0.436217	1	-0.930315	0.0057423	Ribo	Ribo exclusive	-0.891204	0.00894024	-0.551037	0.013555	-0.32883	0.41795	-0.205157	0.452367	abundance
ENSMUSG00000034021	Pds5b	0.419845	0.257822	0.0518796	1	0.471724	0.504998	Unchanged		0.474855	0.0942385	-0.288049	0.582326	0.496681	0.133801	-0.418713	0.560409	background
ENSMUSG00000025195	Dnmbp	0.553107	0.258358	0.0549441	1	0.608051	0.311734	Unchanged		0.861298	0.0423808	0.116755	0.645864	0.818279	0.0949573	0.0286073	0.942118	background
ENSMUSG00000025066	Sfr1	-0.505485	0.258804	0.139505	1	-0.36598	0.784152	Unchanged		-0.378144	0.23605	-0.00982386	0.973813	-0.374831	0.299939	0.064506	0.856548	background
ENSMUSG00000031851	Ntpcr	-0.506449	0.259588	0.425157	1	-0.0812926	1	Unchanged		-0.0194805	0.944555	0.352206	0.0345431	0.0904563	0.824078	0.350059	0.0736669	background
ENSMUSG00000001143	Lman2l	-0.530311	0.2601	-0.233464	1	-0.763775	0.055726	Unchanged		-0.710396	0.0301184	-0.204146	0.234246	-0.677647	0.0961649	-0.179193	0.46857	background
ENSMUSG00000001855	Nup214	0.436228	0.260105	-0.0495788	1	0.386649	0.849608	Unchanged		0.341764	0.158038	-0.374798	0.455556	0.408553	0.131608	-0.706262	0.243093	background
ENSMUSG00000002455	Prpf6	0.251988	0.260105	-0.333822	1	-0.0818347	1	Unchanged		-0.0877604	0.642854	-0.401207	0.0133322	0.0607188	0.823303	-0.365003	0.0477439	buffering
ENSMUSG00000026043	Col3a1	1.04104	0.260105	2.66454	2.65436e-08	3.70558	2.44584e-17	RNA+Ribo	concordant (fwd)	3.54035	5.54832e-06	2.36825	0.00295642	2.22007	0.000849501	-1.95683	0.135576	translation
ENSMUSG00000037370	Enpp1	1.10775	0.260105	1.68957	0.00371616	2.79732	1.51692e-07	RNA+Ribo	concordant (fwd)	2.38013	0.0015782	1.33668	0.0126362	0.945778	0.140904	-0.025117	0.97086	abundance
ENSMUSG00000038859	Baiap2l1	-0.38731	0.260105	-0.590359	0.0721279	-0.977669	1.36246e-05	Ribo	Ribo exclusive	-1.03647	0.000990953	-0.531392	0.0126362	-0.780592	0.0451123	-0.241635	0.52887	translation
ENSMUSG00000040479	Dgkz	0.413884	0.260105	0.224041	1	0.637925	0.0768286	Unchanged		0.620313	0.0170169	0.105231	0.659284	0.635252	0.0348599	0.188262	0.621036	translation
ENSMUSG00000079037	Prnp	-0.490055	0.260105	0.690219	0.116473	0.200165	1	Unchanged		0.19306	0.411399	0.412622	0.342514	0.170984	0.550926	0.363101	0.505237	background
ENSMUSG00000049086	Bmyc	-0.667138	0.260114	-0.0676442	1	-0.734783	0.156151	Unchanged		-0.798579	0.0380293	0.00863005	0.974631	-0.801364	0.0693922	0.0900073	0.807177	background
ENSMUSG00000034653	Ythdc2	0.483577	0.261141	-0.249134	1	0.234443	1	Unchanged		0.153735	0.599803	-0.47476	0.18415	0.190982	0.609607	-0.495819	0.248923	background
ENSMUSG00000036572	Upf3b	0.705226	0.261141	-0.338339	1	0.366886	1	Unchanged		0.343539	0.335947	-0.160808	0.709352	0.38081	0.349049	-0.265122	0.60904	background
ENSMUSG00000038486	Sv2a	0.77065	0.261141	0.176414	1	0.947064	0.0854558	Unchanged		0.927288	0.0152736	0.239974	0.440745	0.814829	0.052943	-0.047828	0.926315	background
ENSMUSG00000042453	Reln	0.727439	0.261141	0.213095	1	0.940534	0.100326	Unchanged		1.0257	0.0181002	-0.029221	0.946806	1.04483	0.0199219	-0.517857	0.273923	translation
ENSMUSG00000060126	Tpt1	-0.941355	0.261371	-0.458101	1	-1.39946	0.00535337	Ribo	Ribo exclusive	-1.02982	0.0547842	-0.480853	0.12607	-1.13812	0.104392	-0.549939	0.206231	background
ENSMUSG00000063334	Krr1	-0.34399	0.261371	0.00309313	1	-0.340897	1	Unchanged		-0.342942	0.196876	-6.31494e-05	0.999604	-0.34303	0.213363	-0.0699122	0.66746	background
ENSMUSG00000021417	Eci2	-0.498463	0.263039	-0.419944	1	-0.918407	0.00171389	Ribo	Ribo exclusive	-0.912924	0.00238034	-0.550538	0.0310655	-0.715852	0.0471301	-0.229519	0.622644	translation
ENSMUSG00000039840	Epg5	0.484848	0.263182	0.0781251	1	0.562973	0.452751	Unchanged		0.624795	0.0422006	0.00918879	0.965689	0.613954	0.0436537	-0.202178	0.335787	translation
ENSMUSG00000040734	Ppp1r13l	0.558611	0.263182	-0.0535047	1	0.505106	0.53811	Unchanged		0.427047	0.127682	-0.0878124	0.725439	0.447493	0.165861	-0.156893	0.630493	background
ENSMUSG00000002265	Peg3	0.672343	0.263347	0.524293	0.957244	1.19664	0.00417943	Ribo	Ribo exclusive	1.14163	0.00431445	0.302812	0.411404	1.0487	0.0205336	-0.0438603	0.950762	translation
ENSMUSG00000022407	Adsl	-0.258601	0.263347	-0.195715	1	-0.454317	0.352336	Unchanged		-0.467783	0.0136703	-0.578955	0.310259	-0.501834	0.0228377	-1.39442	0.233925	translation
ENSMUSG00000000253	Gmpr	-0.362063	0.263568	0.0352574	1	-0.326806	1	Unchanged		-0.373158	0.0920831	-0.232248	0.610966	-0.41265	0.0951246	-0.609187	0.297152	background
ENSMUSG00000019659	Ccdc12	-0.569479	0.263568	0.161966	1	-0.407513	0.911837	Unchanged		-0.464273	0.124731	0.0811308	0.680044	-0.465216	0.190488	0.082806	0.760345	background
ENSMUSG00000034075	Zdhhc5	0.345793	0.263568	0.0217922	1	0.367586	1	Unchanged		0.372573	0.0704595	-0.138936	0.574445	0.356496	0.131608	-0.0472412	0.908766	background
ENSMUSG00000041997	Tlk1	0.506168	0.263568	-0.0852842	1	0.420884	0.8091	Unchanged		0.435834	0.227305	-0.228143	0.313703	0.455802	0.30775	-0.240555	0.404057	background
ENSMUSG00000055027	Smyd1	-0.346698	0.263568	-0.251571	1	-0.598269	0.0714664	Unchanged		-0.60377	0.0135216	-0.374688	0.168339	-0.566847	0.0526521	-0.264191	0.585097	background
ENSMUSG00000061518	Cox5b	-0.382949	0.263568	-0.713556	0.0513663	-1.09651	5.8103e-06	Ribo	Ribo exclusive	-1.11825	0.000744022	-0.903559	0.00739637	-1.36794	0.00487496	-1.35351	0.0425466	translation
ENSMUSG00000022371	Col14a1	0.918108	0.26359	2.14773	4.31532e-05	3.06583	8.3788e-11	RNA+Ribo	concordant (fwd)	2.8454	7.10471e-05	1.69564	0.0163607	1.62983	0.000849501	-1.62133	0.0328467	translation
ENSMUSG00000060090	Rp2	0.578651	0.26359	0.289819	1	0.86847	0.0932537	Unchanged		0.883373	0.0118066	0.166891	0.424251	0.859113	0.0377236	0.124632	0.719541	translation
ENSMUSG00000030447	Cyfip1	0.478822	0.263786	0.223714	1	0.702536	0.0499911	Ribo	Ribo exclusive	0.626319	0.037555	0.0215	0.956237	0.611536	0.0229163	-0.549503	0.0859253	translation
ENSMUSG00000003549	Ercc1	0.953885	0.263977	-0.451916	1	0.501968	0.668473	Unchanged		0.0627556	0.922389	-0.605486	0.059961	-0.164904	0.855533	-0.599583	0.112389	background
ENSMUSG00000017485	Top2b	0.519939	0.263977	0.015647	1	0.535586	0.426962	Unchanged		0.385547	0.307352	-0.0886524	0.687643	0.441485	0.298279	-0.148463	0.564735	background
ENSMUSG00000020650	Bcap29	0.534173	0.263977	-0.482487	0.859855	0.0516861	1	Unchanged		-0.001139	0.996917	-0.577344	0.0242103	-0.200992	0.646509	-0.57762	0.0510749	background
ENSMUSG00000026209	Dnpep	-0.290758	0.263977	0.139845	1	-0.150913	1	Unchanged		-0.189707	0.359149	-0.00289203	0.991751	-0.19056	0.40718	-0.103755	0.720087	background
ENSMUSG00000001240	Ramp2	0.490913	0.264224	0.0297241	1	0.520637	0.28266	Unchanged		0.519099	0.0535097	0.0699252	0.804131	0.497737	0.097816	-0.0943515	0.815828	background
ENSMUSG00000036104	Rab3gap1	0.369061	0.264224	-0.167077	1	0.201984	1	Unchanged		0.179115	0.499366	-0.225848	0.215664	0.305031	0.324929	-0.271654	0.195845	background
ENSMUSG00000056131	Pgm3	0.65057	0.264757	0.173239	1	0.823809	0.0843382	Unchanged		0.76103	0.0304314	0.0882301	0.725712	0.660993	0.0349536	-0.277433	0.264334	translation
ENSMUSG00000065954	Tacc1	0.360502	0.265005	-0.087981	1	0.272521	1	Unchanged		0.27129	0.244395	-0.253304	0.310617	0.254363	0.368329	-0.227623	0.485812	background
ENSMUSG00000037531	Mrpl47	-0.49865	0.265289	-0.463609	0.808059	-0.962259	0.00114543	Ribo	Ribo exclusive	-1.05744	0.000990953	-0.417084	0.084588	-1.10489	0.00705028	-0.524312	0.291279	translation
ENSMUSG00000000489	Pdgfb	0.563303	0.26537	0.177349	1	0.740651	0.140615	Unchanged		0.700833	0.0181848	-0.0133919	0.969951	0.701802	0.0397475	-0.0718238	0.894369	translation
ENSMUSG00000022146	Osmr	0.971082	0.26537	0.195119	1	1.1662	0.0520109	Unchanged		0.988176	0.0728041	0.171904	0.672087	0.864538	0.135061	-0.13014	0.80672	background
ENSMUSG00000028339	Col15a1	0.825839	0.26537	1.84852	0.000210985	2.67436	5.38642e-10	RNA+Ribo	concordant (fwd)	2.51483	5.18675e-05	1.50037	0.0302263	1.65948	0.000623072	-1.97604	0.0312613	translation
ENSMUSG00000002847	Pla1a	0.56152	0.26543	0.181018	1	0.742539	0.0976116	Unchanged		0.711018	0.00817647	-0.0408264	0.914625	0.724882	0.0131413	-0.600694	0.239837	translation
ENSMUSG00000020070	Rufy2	0.908751	0.265711	-0.147761	1	0.76099	0.43655	Unchanged		0.653278	0.124545	-0.0535147	0.862843	0.579014	0.0647881	0.27926	0.207221	background
ENSMUSG00000078671	Chd2	0.400921	0.265711	-0.592787	0.0687696	-0.191866	1	Unchanged		-0.263365	0.245974	-0.712299	0.00355682	-0.109379	0.784299	-0.651667	0.0298761	buffering
ENSMUSG00000030120	Mlf2	-0.399149	0.266443	0.0689683	1	-0.33018	1	Unchanged		-0.380213	0.100837	-0.155218	0.672758	-0.436461	0.0690603	-0.577748	0.140374	background
ENSMUSG00000033096	Apmap	-0.435271	0.266948	-0.329608	1	-0.76488	0.00910215	Ribo	Ribo exclusive	-0.830316	0.00363821	-0.533629	0.0707431	-0.785894	0.0268803	-0.423488	0.445297	translation
ENSMUSG00000039616	Mocos	0.81306	0.266948	-0.00537581	1	0.807685	0.257093	Unchanged		0.912916	0.00337734	-0.0416554	0.854362	0.926052	0.00998108	-0.197626	0.600202	translation
ENSMUSG00000030123	Plxnd1	0.697678	0.267138	0.833583	0.157021	1.53126	2.18785e-05	Ribo	Ribo exclusive	1.40285	0.000672039	0.617183	0.136571	1.13227	0.0084326	-0.361708	0.640377	translation
ENSMUSG00000031342	Gpm6b	0.680876	0.267155	1.04875	0.00511091	1.72963	5.06306e-06	RNA+Ribo	concordant (fwd)	1.49071	0.000909495	0.85353	0.00701038	0.588201	0.140904	-0.0143756	0.972543	abundance
ENSMUSG00000017817	Jph2	-0.463343	0.267315	0.204379	1	-0.258964	1	Unchanged		-0.287594	0.350317	0.105868	0.60773	-0.231645	0.517687	0.0513595	0.847776	background
ENSMUSG00000021258	Ccnk	0.576181	0.267428	-0.442682	1	0.133498	1	Unchanged		0.0605213	0.872693	-0.438783	0.0649367	-0.137248	0.781214	-0.426899	0.117954	background
ENSMUSG00000025825	Iscu	-0.456716	0.267428	-0.0429883	1	-0.499704	0.385508	Unchanged		-0.538694	0.0282345	-0.140928	0.533247	-0.567108	0.0479526	-0.247218	0.462939	translation
ENSMUSG00000021276	Cinp	-0.508352	0.267829	0.272783	1	-0.235568	1	Unchanged		-0.222381	0.453727	0.16936	0.379531	-0.148203	0.688932	0.133638	0.568363	background
ENSMUSG00000046201	Scaf8	0.396064	0.268446	-0.437661	0.586327	-0.0415962	1	Unchanged		-0.0892326	0.684836	-0.534782	0.0125663	0.072418	0.824078	-0.5016	0.040948	buffering
ENSMUSG00000021816	Ppp3cb	0.412855	0.268841	-0.199354	1	0.213501	1	Unchanged		0.156207	0.598092	-0.361004	0.145906	0.162019	0.683314	-0.362872	0.226315	background
ENSMUSG00000001052	Sec24b	0.398695	0.269003	0.0904086	1	0.489103	0.378042	Unchanged		0.429152	0.0859345	0.021278	0.911426	0.440071	0.114983	0.112483	0.627538	background
ENSMUSG00000003437	Paf1	-0.349434	0.269326	-0.307502	1	-0.656936	0.0158923	Ribo	Ribo exclusive	-0.677126	0.00252046	-0.25792	0.219071	-0.586991	0.0153502	0.212857	0.619612	translation
ENSMUSG00000020794	Ube2g1	-0.379601	0.269326	-0.0924151	1	-0.472016	0.484849	Unchanged		-0.538231	0.0625894	-0.182866	0.264562	-0.562744	0.1176	-0.200949	0.371156	background
ENSMUSG00000026213	Stk11ip	0.607267	0.269326	-0.0131264	1	0.594141	0.612958	Unchanged		0.566846	0.157383	0.00122273	0.994991	0.565073	0.175707	-0.0906386	0.658146	background
ENSMUSG00000027890	Gstm4	-0.586579	0.269326	-0.247385	1	-0.833964	0.090771	Unchanged		-1.03969	0.0209188	-0.216293	0.398761	-1.06286	0.0510834	-0.248058	0.52043	background
ENSMUSG00000031375	Bgn	0.853793	0.269326	1.49855	0.00166169	2.35235	1.51494e-09	RNA+Ribo	concordant (fwd)	2.22151	5.6801e-05	1.00023	0.212977	1.85412	0.000623072	-2.70111	0.0561711	translation
ENSMUSG00000031565	Fgfr1	0.586507	0.269326	0.693262	0.310841	1.27977	0.000270733	Ribo	Ribo exclusive	1.38367	0.00198698	0.580315	0.0219797	1.2515	0.0377577	0.473363	0.276358	translation
ENSMUSG00000032035	Ets1	0.726357	0.269326	0.415043	1	1.1414	0.00719392	Ribo	Ribo exclusive	1.06242	0.0096344	0.250792	0.539529	0.843968	0.00633881	-0.70547	0.038337	translation
ENSMUSG00000037204	Atg101	-0.530006	0.269326	-0.0395091	1	-0.569515	0.321136	Unchanged		-0.661676	0.0381808	0.0158488	0.955943	-0.673567	0.0403322	0.293175	0.32697	translation
ENSMUSG00000038241	Cep250	0.884581	0.269326	0.462902	0.92639	1.34748	0.0045475	Ribo	Ribo exclusive	1.3647	0.00870743	0.446625	0.0424218	1.54037	0.0351615	0.528715	0.116914	translation
ENSMUSG00000038872	Zfhx3	0.980923	0.269326	0.275964	1	1.25689	0.0392004	Ribo	Ribo exclusive	0.847682	0.16287	0.13408	0.672087	0.738039	0.275358	-0.00188278	0.99697	background
ENSMUSG00000040813	Tex264	-0.433668	0.269326	0.344602	1	-0.0890658	1	Unchanged		-0.111417	0.634266	0.102688	0.809423	-0.0986847	0.724573	0.0422022	0.937726	background
ENSMUSG00000055553	Kxd1	-0.532361	0.269326	-0.0357488	1	-0.56811	0.280687	Unchanged		-0.598622	0.0847218	-0.283417	0.457143	-0.711898	0.0688854	-0.554768	0.233115	background
ENSMUSG00000040351	Ankib1	0.473478	0.269361	0.315781	1	0.789259	0.0861432	Unchanged		0.660015	0.0473563	0.230947	0.0893514	0.267583	0.536862	0.128846	0.441202	background
ENSMUSG00000029998	Pcyox1	0.399196	0.269463	0.125333	1	0.524529	0.246069	Unchanged		0.509611	0.0693255	-0.0658042	0.827532	0.523944	0.102683	-0.181034	0.654028	background
ENSMUSG00000039741	Bahcc1	0.8769	0.269594	0.642453	0.654103	1.51935	0.0032308	Ribo	Ribo exclusive	1.82846	0.00980776	0.547912	0.167874	1.80252	0.0418594	0.52076	0.414826	translation
ENSMUSG00000015002	Efr3a	0.362065	0.269639	-0.0932419	1	0.268823	1	Unchanged		0.183509	0.496756	-0.118545	0.361728	0.159494	0.651616	-0.113743	0.467489	background
ENSMUSG00000025212	Sfxn3	0.594581	0.270127	0.364339	1	0.958919	0.0144569	Ribo	Ribo exclusive	0.865399	0.0110062	0.446856	0.0978844	1.12226	0.00987524	0.79069	0.0517163	translation
ENSMUSG00000027573	Gid8	-0.458987	0.270127	-0.495457	0.735706	-0.954444	0.00077027	Ribo	Ribo exclusive	-1.05972	0.00273731	-0.69548	0.0202613	-0.791795	0.071411	-0.349204	0.483263	abundance
ENSMUSG00000028329	Xpa	-0.499788	0.270127	-0.412692	1	-0.91248	0.0238613	Ribo	Ribo exclusive	-1.10727	0.0101966	-0.400082	0.0136121	-1.40083	0.0473293	-0.468677	0.044637	translation
ENSMUSG00000032456	Nmnat3	-0.609678	0.270186	-0.0900316	1	-0.699709	0.287554	Unchanged		-0.824151	0.0137024	0.00801387	0.9833	-0.830083	0.00919519	0.624015	0.0810123	translation
ENSMUSG00000021290	Atp5mpl	-0.48441	0.270194	-0.305206	1	-0.789616	0.0233132	Ribo	Ribo exclusive	-0.781307	0.0147242	-0.367223	0.0244597	-0.455134	0.302487	-0.236102	0.282211	abundance
ENSMUSG00000021038	Vipas39	-0.374936	0.270592	-0.391237	1	-0.766173	0.009275	Ribo	Ribo exclusive	-0.725263	0.00509672	-0.336991	0.0754005	-0.502825	0.0717339	-0.00112466	0.997642	background
ENSMUSG00000023150	Ivns1abp	0.533237	0.270592	-0.253689	1	0.279548	1	Unchanged		0.207074	0.541095	-0.323242	0.14456	0.426396	0.281996	-0.378458	0.131134	background
ENSMUSG00000074746	Pdzd8	0.505507	0.270592	-0.0682783	1	0.437229	0.756185	Unchanged		0.51703	0.084835	-0.150658	0.378599	0.58467	0.105422	-0.207429	0.351834	background
ENSMUSG00000034154	Ino80	0.589828	0.270666	-0.146834	1	0.442995	1	Unchanged		0.568366	0.0925174	-0.45674	0.330194	0.586514	0.15263	-0.500218	0.435751	background
ENSMUSG00000051851	Rtl8c	-0.823933	0.271046	0.281186	1	-0.542747	0.55642	Unchanged		-0.615607	0.0735966	0.318454	0.368557	-0.696689	0.0885403	0.478141	0.312852	background
ENSMUSG00000029096	Htra3	0.753686	0.271202	0.275466	1	1.02915	0.032315	Ribo	Ribo exclusive	0.87963	0.0535734	0.208375	0.490624	0.764087	0.136387	0.0298301	0.948172	background
ENSMUSG00000035112	Wnk4	0.826018	0.271202	-0.238289	1	0.587729	0.864173	Unchanged		0.424125	0.361217	-0.338483	0.217972	0.555169	0.337435	-0.387213	0.240775	background
ENSMUSG00000049755	Zfp672	-0.491319	0.271378	-0.367921	1	-0.859241	0.0291592	Ribo	Ribo exclusive	-0.983124	0.0195145	-0.37685	0.0149137	-0.615319	0.372442	-0.308221	0.124158	abundance
ENSMUSG00000023186	Vwa5a	0.414662	0.27184	0.354221	1	0.768883	0.0126176	Ribo	Ribo exclusive	0.661999	0.0336094	0.31396	0.0241248	0.361808	0.467298	0.247851	0.160982	abundance
ENSMUSG00000023852	Chd1	0.368046	0.272004	-0.0991982	1	0.268848	1	Unchanged		0.161464	0.548937	-0.186882	0.255512	0.237548	0.472457	-0.208334	0.286403	background
ENSMUSG00000024044	Epb41l3	-0.586432	0.272004	-0.419868	1	-1.0063	0.0075328	Ribo	Ribo exclusive	-1.05292	0.00163382	-0.587135	0.0483139	-1.2615	0.00465892	-1.01414	0.0680939	translation
ENSMUSG00000025534	Gusb	0.781223	0.272004	0.699915	0.519771	1.48114	0.00050063	Ribo	Ribo exclusive	1.26741	0.00572414	0.648883	0.00779907	0.206672	0.678383	0.182343	0.458991	abundance
ENSMUSG00000025810	Nrp1	0.456828	0.272004	0.51875	0.541773	0.975578	0.000307916	Ribo	Ribo exclusive	1.01115	0.00265571	0.470965	0.0131026	0.625473	0.14258	0.225362	0.425154	abundance
ENSMUSG00000026028	Trak2	-0.480284	0.272004	-0.211515	1	-0.691799	0.111213	Unchanged		-0.822335	0.0125552	-0.271234	0.0991098	-0.492482	0.174903	-0.0643555	0.791731	background
ENSMUSG00000027829	Ccnl1	0.503237	0.272004	-0.418655	0.994567	0.084582	1	Unchanged		0.149138	0.649358	-0.447169	0.0173371	0.37758	0.446412	-0.465814	0.0377365	buffering
ENSMUSG00000031848	Lsm4	-0.502464	0.272004	0.213098	1	-0.289366	1	Unchanged		-0.383117	0.16992	0.0206919	0.953961	-0.379284	0.235967	-0.0647649	0.883746	background
ENSMUSG00000038250	Usp38	0.445522	0.272004	-0.0810105	1	0.364511	0.992679	Unchanged		0.338732	0.211122	-0.226848	0.384017	0.445769	0.137122	-0.379416	0.206307	background
ENSMUSG00000038324	Trpc4ap	0.210025	0.272004	-0.129593	1	0.0804316	1	Unchanged		0.0739789	0.679165	-0.287555	0.241523	0.0902121	0.670472	-0.316358	0.290957	background
ENSMUSG00000043542	Zc2hc1a	0.648188	0.272004	0.104656	1	0.752844	0.138184	Unchanged		0.522525	0.241857	0.177255	0.437432	0.66652	0.189118	0.260617	0.329936	background
ENSMUSG00000054428	Atpif1	-0.446048	0.272004	0.110583	1	-0.335465	1	Unchanged		-0.437126	0.146413	-0.104131	0.781635	-0.45325	0.191465	-0.196945	0.683029	background
ENSMUSG00000014873	Surf2	-0.419523	0.272574	-0.0198103	1	-0.439334	0.596874	Unchanged		-0.487603	0.0270616	0.0847971	0.762831	-0.530371	0.018958	0.634307	0.04431	translation
ENSMUSG00000030603	Psmc4	-0.346379	0.272724	0.186792	1	-0.159587	1	Unchanged		-0.209483	0.326306	0.0805148	0.680499	-0.257788	0.24486	0.202224	0.318611	background
ENSMUSG00000070934	Rraga	0.306386	0.273294	-0.223833	1	0.0825527	1	Unchanged		0.049848	0.831745	-0.284011	0.022803	0.209653	0.546528	-0.289398	0.0510749	background
ENSMUSG00000025027	Xpnpep1	-0.362122	0.273624	-0.0884535	1	-0.450576	0.60724	Unchanged		-0.484185	0.0390368	-0.0580058	0.747193	-0.48806	0.0714676	-0.0757223	0.786268	background
ENSMUSG00000032583	Mon1a	0.516501	0.273762	-0.182279	1	0.334221	1	Unchanged		0.356209	0.384475	-0.308583	0.0911177	0.0737636	0.902996	-0.261901	0.218116	background
ENSMUSG00000021257	Angel1	0.703413	0.273969	0.137292	1	0.840705	0.235195	Unchanged		0.770829	0.00398646	0.217866	0.461924	0.715361	0.0166769	-0.144656	0.805149	translation
ENSMUSG00000005672	Kit	0.969635	0.274464	0.935075	0.181547	1.90471	0.000790641	Ribo	Ribo exclusive	1.79551	0.00136312	0.801012	0.0249084	1.00541	0.0639794	-0.0287189	0.958946	abundance
ENSMUSG00000029661	Col1a2	0.804116	0.274464	2.39221	1.48202e-07	3.19633	5.89627e-15	RNA+Ribo	concordant (fwd)	3.07901	5.30435e-06	2.00404	0.0080205	2.43364	0.000768256	-1.2935	0.522968	translation
ENSMUSG00000040146	Rgl3	0.673846	0.274464	-0.322573	1	0.351272	1	Unchanged		0.620315	0.244671	-0.202567	0.534416	0.710973	0.251568	-0.284473	0.46857	background
ENSMUSG00000018509	Cenpv	-0.573797	0.274529	-0.43531	1	-1.00911	0.00513316	Ribo	Ribo exclusive	-1.06957	0.00479244	-0.432053	0.0215936	-0.726571	0.145543	-0.255214	0.356285	abundance
ENSMUSG00000001419	Mef2d	-0.406734	0.274632	-0.255186	1	-0.66192	0.0343226	Ribo	Ribo exclusive	-0.7068	0.00299241	-0.196309	0.399387	-0.610202	0.0121083	0.434881	0.231729	translation
ENSMUSG00000033022	Cdo1	-1.00719	0.274632	-1.64533	0.000326191	-2.65252	4.92968e-07	RNA+Ribo	concordant (fwd)	-2.65741	0.000368833	-1.35048	0.0273746	-1.7562	0.0172771	0.267183	0.807793	translation
ENSMUSG00000024560	Cxxc1	-0.361363	0.274858	-0.153639	1	-0.515001	0.27188	Unchanged		-0.535121	0.0342477	-0.14718	0.345313	-0.352962	0.147925	0.068369	0.72265	background
ENSMUSG00000073481	Marc2	-0.348618	0.274942	0.0381958	1	-0.310422	1	Unchanged		-0.341823	0.0998993	-0.040037	0.841993	-0.325512	0.154352	0.101222	0.695504	background
ENSMUSG00000020954	Strn3	0.305505	0.275	-0.137225	1	0.168279	1	Unchanged		0.0961637	0.745571	-0.235444	0.157379	-0.00538301	0.990782	-0.223296	0.252356	background
ENSMUSG00000042548	Asxl1	0.303889	0.275	-0.0649272	1	0.238962	1	Unchanged		0.216145	0.286325	-0.105889	0.453518	0.273723	0.233646	-0.16066	0.340794	background
ENSMUSG00000029629	Phf14	0.358333	0.275394	-0.339341	1	0.0189913	1	Unchanged		-0.0211335	0.941157	-0.38109	0.00572218	0.0313067	0.956955	-0.380755	0.0229841	buffering
ENSMUSG00000001946	Esam	0.500955	0.275557	-0.010358	1	0.490597	0.485796	Unchanged		0.627868	0.0830051	-0.0638859	0.773625	0.720241	0.0296998	-0.301217	0.144422	translation
ENSMUSG00000002345	Borcs8	-0.442375	0.275557	-0.0221077	1	-0.464483	0.499557	Unchanged		-0.457626	0.028656	-0.0875738	0.65487	-0.455616	0.058575	-0.07504	0.825325	background
ENSMUSG00000020590	Snx13	0.584739	0.275557	-0.00394151	1	0.580797	0.47153	Unchanged		0.44038	0.334086	-0.0703662	0.678051	0.526625	0.299753	-0.111922	0.567798	background
ENSMUSG00000026755	Arpc5l	-0.387746	0.275557	0.213392	1	-0.174354	1	Unchanged		-0.206187	0.395546	0.113422	0.50239	-0.136132	0.634662	0.0583184	0.786312	background
ENSMUSG00000037933	Bicd2	-0.345055	0.275557	0.147501	1	-0.197554	1	Unchanged		-0.19675	0.393255	0.044746	0.804342	-0.189558	0.484182	0.0278303	0.90637	background
ENSMUSG00000075592	Nynrin	0.683234	0.275557	0.73717	0.160199	1.4204	0.00144934	Ribo	Ribo exclusive	1.38601	0.00202681	0.519079	0.104403	1.24676	0.0218509	0.28493	0.638802	translation
ENSMUSG00000047843	Bri3	-0.581513	0.275622	-0.036602	1	-0.618115	0.28266	Unchanged		-0.633987	0.0201457	-0.24655	0.468477	-0.678933	0.0332622	-0.465867	0.369392	translation
ENSMUSG00000005873	Reep5	-0.352694	0.276442	-0.188301	1	-0.540995	0.168826	Unchanged		-0.549567	0.00762666	-0.612915	0.341092	-0.576737	0.0163644	-1.25643	0.351816	translation
ENSMUSG00000026924	Sec16a	0.259116	0.276442	-0.0882238	1	0.170892	1	Unchanged		0.125616	0.565233	-0.136055	0.30021	0.19184	0.467298	-0.153927	0.323476	background
ENSMUSG00000028270	Gbp2	0.630871	0.276442	0.169657	1	0.800529	0.116335	Unchanged		0.712654	0.0903616	0.130095	0.535821	0.552429	0.206764	-0.026094	0.925716	background
ENSMUSG00000028411	Aptx	-0.417779	0.276442	-0.0679965	1	-0.485776	0.672946	Unchanged		-0.53844	0.0823018	-0.00921512	0.969951	-0.542702	0.119374	-0.101419	0.726202	background
ENSMUSG00000031990	Jam3	0.560975	0.276442	0.430716	1	0.991692	0.00780864	Ribo	Ribo exclusive	0.972295	0.0136378	0.449707	0.0396878	0.36534	0.370984	0.0966644	0.719227	abundance
ENSMUSG00000039713	Plekhg5	0.580559	0.276442	-0.10184	1	0.478719	0.687793	Unchanged		0.492163	0.0590441	-0.386073	0.368006	0.517329	0.0957902	-0.492401	0.429105	background
ENSMUSG00000053119	Chmp3	-0.407084	0.276442	0.244441	1	-0.162643	1	Unchanged		-0.227957	0.399837	0.0142452	0.970954	-0.234042	0.40095	0.178562	0.620797	background
ENSMUSG00000056220	Pla2g4a	1.17	0.276442	1.27767	0.00813781	2.44766	6.56284e-06	RNA+Ribo	concordant (fwd)	2.34715	0.00254734	1.2766	0.001567	1.93897	0.140474	1.12638	0.0618289	abundance
ENSMUSG00000041625	Ggact	-0.605771	0.277218	-0.229857	1	-0.835628	0.0667413	Unchanged		-0.958432	0.0074145	-0.121303	0.709491	-0.860624	0.00901734	0.548695	0.123563	translation
ENSMUSG00000055302	Mrfap1	-0.664284	0.277218	0.381102	1	-0.283182	1	Unchanged		-0.399531	0.284534	0.415014	0.161663	-0.264472	0.587659	0.338853	0.352998	background
ENSMUSG00000028608	0610037L13Rik	-0.334691	0.277695	0.128158	1	-0.206533	1	Unchanged		-0.194557	0.302422	-0.0176187	0.949024	-0.194152	0.370314	-0.00410179	0.991019	background
ENSMUSG00000036678	Aaas	0.474245	0.277695	0.0959396	1	0.570184	0.448803	Unchanged		0.579071	0.022293	0.14928	0.53613	0.521323	0.0613035	-0.0885452	0.818356	background
ENSMUSG00000032112	Trappc4	-0.445171	0.27773	0.405718	1	-0.0394529	1	Unchanged		-0.0595489	0.857639	0.385681	0.0197398	0.09514	0.855629	0.38091	0.0510025	background
ENSMUSG00000021619	Atg10	-0.458241	0.277902	-0.212097	1	-0.670338	0.157868	Unchanged		-0.667574	0.0297403	-0.292245	0.098326	-0.753918	0.0648636	-0.347731	0.169356	background
ENSMUSG00000024091	Vapa	0.410275	0.277902	0.0325751	1	0.44285	0.785779	Unchanged		0.411589	0.124377	0.0246136	0.890832	0.399931	0.188048	-0.0295863	0.90084	background
ENSMUSG00000028228	Cpne3	0.565301	0.277902	0.161699	1	0.727001	0.143119	Unchanged		0.719675	0.0739675	-0.0822103	0.841303	0.752701	0.0918602	-0.316255	0.52374	background
ENSMUSG00000033991	Ttc37	0.505234	0.277902	0.17898	1	0.684214	0.112426	Unchanged		0.622766	0.0834684	0.00812105	0.981354	0.618554	0.116755	-0.156957	0.667149	background
ENSMUSG00000034152	Exoc3	-0.218044	0.277902	-0.168683	1	-0.386727	0.716827	Unchanged		-0.385556	0.0401441	-0.301022	0.1588	-0.316122	0.138776	-0.0475251	0.904545	background
ENSMUSG00000039623	Ap5z1	0.627307	0.277902	0.580176	0.528216	1.20748	0.00313968	Ribo	Ribo exclusive	1.09689	0.00286611	0.67372	0.0230247	1.0167	0.0386079	0.575224	0.261174	translation
ENSMUSG00000037012	Hk1	0.312898	0.277936	0.0422894	1	0.355187	0.981385	Unchanged		0.33994	0.114189	-0.113516	0.70655	0.361627	0.137012	-0.281347	0.472307	background
ENSMUSG00000027322	Siglec1	0.890316	0.278921	1.22297	0.0320839	2.11329	4.17264e-06	RNA+Ribo	concordant (fwd)	1.83262	0.000748024	0.964964	0.0247508	1.34763	0.0305394	0.227527	0.786127	translation
ENSMUSG00000016918	Sulf1	0.724789	0.278938	0.936287	0.12794	1.66108	9.22478e-06	Ribo	Ribo exclusive	1.54872	0.000922881	0.517899	0.426831	1.29946	0.00164915	-1.54388	0.0593802	translation
ENSMUSG00000028656	Cap1	0.456857	0.279314	0.527354	0.799902	0.984211	0.000851434	Ribo	Ribo exclusive	0.949549	0.00361293	0.346594	0.212179	0.715485	0.0236919	-0.267228	0.495161	translation
ENSMUSG00000034610	Tut4	0.515817	0.280665	-0.399168	1	0.116649	1	Unchanged		-0.0989391	0.813292	-0.569195	0.0448545	0.294808	0.554632	-0.536343	0.0783523	background
ENSMUSG00000026500	Cox20	1.00078	0.281085	-0.450057	1	0.550724	0.887279	Unchanged		-0.0604463	0.929356	-0.573455	0.0148085	-1.43053	0.0464076	-0.587096	0.0152657	translation
ENSMUSG00000054302	Eapp	-0.326272	0.281524	-0.240892	1	-0.567164	0.0780236	Unchanged		-0.607534	0.0173647	-0.239512	0.099444	-0.669025	0.0479526	-0.282725	0.188722	translation
ENSMUSG00000021496	Pcbd2	-0.593792	0.282044	-0.0429966	1	-0.636788	0.26231	Unchanged		-0.677181	0.0309875	-0.0848418	0.758836	-0.700492	0.0525507	-0.213645	0.583697	background
ENSMUSG00000038506	Dcun1d2	-0.460415	0.282044	-0.373344	1	-0.83376	0.00727279	Ribo	Ribo exclusive	-0.854824	0.00289352	-0.277048	0.358484	-0.830891	0.0133641	-0.151662	0.814537	translation
ENSMUSG00000003429	Rps11	0.665139	0.283213	0.067117	1	0.732256	0.184839	Unchanged		0.568688	0.13273	-0.0465169	0.852155	0.531048	0.188968	0.0890067	0.768963	background
ENSMUSG00000018906	P4ha2	0.282698	0.283213	-0.135717	1	0.146981	1	Unchanged		0.135506	0.497959	-0.190539	0.161663	0.173769	0.49033	-0.204546	0.217901	background
ENSMUSG00000022205	Sub1	-0.725094	0.283213	-0.397972	1	-1.12307	0.00767135	Ribo	Ribo exclusive	-1.36456	0.0169788	-0.396818	0.0765364	-1.58513	0.0412229	-0.492712	0.132921	translation
ENSMUSG00000024404	Riok3	-0.440666	0.283213	-0.00344655	1	-0.444112	0.782862	Unchanged		-0.582305	0.105684	-0.0459021	0.783317	-0.665555	0.0634302	-0.167316	0.335188	background
ENSMUSG00000001211	Agpat3	-0.464741	0.283613	-0.34101	1	-0.805751	0.0079831	Ribo	Ribo exclusive	-0.896718	0.00475239	-0.518118	0.0821126	-1.01078	0.0141776	-0.743305	0.148382	translation
ENSMUSG00000020176	Grb10	0.392825	0.283613	0.456307	0.680542	0.849132	0.000894712	Ribo	Ribo exclusive	0.804818	0.00268526	0.19106	0.65285	0.740744	0.00676386	-0.932181	0.129548	translation
ENSMUSG00000027680	Fxr1	-0.356784	0.283613	-0.443552	0.840696	-0.800336	0.00456616	Ribo	Ribo exclusive	-0.796961	0.0116851	-0.564034	0.0133696	-0.847146	0.070676	-0.597619	0.0834286	abundance
ENSMUSG00000033910	Gucy1a1	0.791869	0.283613	0.490496	1	1.28236	0.00431261	Ribo	Ribo exclusive	1.09615	0.0171435	0.182563	0.707708	0.980113	0.025812	-0.531121	0.333835	translation
ENSMUSG00000044496	2510039O18Rik	-0.442485	0.283613	0.563171	0.415682	0.120686	1	Unchanged		0.0546492	0.856828	0.389109	0.147558	0.176406	0.613423	0.407247	0.183132	background
ENSMUSG00000015869	Prpsap1	-0.439633	0.283767	0.142615	1	-0.297018	1	Unchanged		-0.365566	0.158671	-0.0557669	0.856832	-0.364929	0.225992	-0.0502571	0.907927	background
ENSMUSG00000025190	Got1	-0.197892	0.283767	-1.21265	3.24645e-24	-1.41054	7.52459e-37	RNA+Ribo	concordant (fwd)	-1.43499	5.30435e-06	-1.28548	3.88221e-06	-1.57628	0.00886222	-1.44455	0.0319249	translation
ENSMUSG00000058325	Dock1	0.574678	0.283767	-0.0474344	1	0.527244	0.377502	Unchanged		0.493686	0.212718	-0.250487	0.48579	0.573763	0.21093	-0.363263	0.406623	background
ENSMUSG00000033364	Usp37	0.519619	0.283779	-0.0729486	1	0.44667	1	Unchanged		0.324423	0.438256	-0.246562	0.333517	0.496938	0.294679	-0.317411	0.268265	background
ENSMUSG00000034345	Gtf2h5	-0.616264	0.283779	0.188169	1	-0.428095	0.873333	Unchanged		-0.645446	0.196313	0.265854	0.286844	-0.585998	0.352808	0.23772	0.45528	background
ENSMUSG00000034867	Ankrd27	0.499851	0.283779	0.76218	0.000310359	1.26203	0.0005462	RNA+Ribo	concordant (fwd)	1.31949	0.000537588	0.709718	0.000221468	1.03152	0.236756	0.651733	0.0192747	abundance
ENSMUSG00000035649	Zcchc7	0.714693	0.283779	-0.421798	1	0.292895	1	Unchanged		0.633558	0.434656	-0.572933	0.0300879	1.27338	0.270624	-0.627201	0.0466461	buffering
ENSMUSG00000003617	Cp	0.550928	0.283839	-0.12537	1	0.425558	0.851629	Unchanged		0.278768	0.479749	-0.181087	0.562324	0.402592	0.324929	-0.285538	0.379226	background
ENSMUSG00000027422	Rrbp1	0.504507	0.28425	0.453177	1	0.957684	0.00732028	Ribo	Ribo exclusive	0.825227	0.0137183	0.351439	0.0856836	0.309194	0.220694	-0.0818539	0.670565	background
ENSMUSG00000062300	Nectin2	-0.386719	0.284322	0.176787	1	-0.209932	1	Unchanged		-0.247835	0.345548	0.0756488	0.673129	-0.199601	0.503208	0.017454	0.940572	background
ENSMUSG00000026812	Tsc1	0.575268	0.28557	-0.256289	1	0.318979	1	Unchanged		0.507679	0.230042	-0.288645	0.0576895	1.05411	0.0637248	-0.358156	0.0477439	buffering
ENSMUSG00000028907	Utp11	-0.379493	0.28557	-0.0448289	1	-0.424321	0.615976	Unchanged		-0.458308	0.0655098	-0.183275	0.40481	-0.443121	0.132439	-0.15113	0.64368	background
ENSMUSG00000022428	Cby1	-0.713347	0.286185	-0.0969779	1	-0.810325	0.07289	Unchanged		-0.822722	0.0178049	-0.131444	0.559044	-0.669568	0.034378	0.227219	0.356956	translation
ENSMUSG00000022865	Cxadr	0.314701	0.286185	0.160946	1	0.475646	0.253903	Unchanged		0.463768	0.012158	-0.0905572	0.821994	0.462246	0.0282285	0.0275902	0.977142	translation
ENSMUSG00000004895	Prcc	-0.386661	0.286249	-0.107858	1	-0.494518	0.373068	Unchanged		-0.526612	0.0283652	-0.0438476	0.846158	-0.504433	0.0514331	0.195198	0.501279	background
ENSMUSG00000025816	Sec61a2	0.575169	0.286249	-0.444234	0.920894	0.130935	1	Unchanged		0.281886	0.587767	-0.514187	0.00491802	-0.0909348	0.931914	-0.501644	0.0227379	buffering
ENSMUSG00000025959	Klf7	0.541556	0.286249	-0.0644949	1	0.477061	0.725053	Unchanged		0.390295	0.320425	-0.20287	0.344844	0.49223	0.292727	-0.249148	0.333744	background
ENSMUSG00000034037	Fgd5	0.645971	0.286249	0.0359984	1	0.681969	0.277273	Unchanged		0.57675	0.0703232	-0.0168042	0.965201	0.586984	0.0624258	-0.385617	0.287122	background
ENSMUSG00000037622	Wdtc1	-0.465213	0.286249	-0.401929	1	-0.867141	0.00535337	Ribo	Ribo exclusive	-0.872066	0.0076431	-0.387056	0.0184891	-0.534257	0.234591	-0.243355	0.285092	abundance
ENSMUSG00000001270	Ckb	-0.608495	0.286294	0.463888	1	-0.144607	1	Unchanged		-0.15451	0.50514	0.102936	0.854362	-0.174102	0.483111	0.322752	0.564466	background
ENSMUSG00000016510	Mtif3	-0.530058	0.286294	-0.00642063	1	-0.536479	0.440619	Unchanged		-0.658099	0.0893057	-0.102565	0.546314	-0.426482	0.179986	0.0748373	0.663462	background
ENSMUSG00000026926	Pmpca	-0.243439	0.286294	-0.175072	1	-0.41851	0.41282	Unchanged		-0.417156	0.0408776	-0.158594	0.320372	-0.333414	0.139279	0.0143097	0.955123	background
ENSMUSG00000042099	Kank3	0.654753	0.286628	-0.377591	1	0.277162	1	Unchanged		0.293185	0.411884	-0.736002	0.1659	0.433886	0.318217	-0.865183	0.170622	background
ENSMUSG00000007670	Khsrp	0.398813	0.286905	0.053495	1	0.452308	0.524417	Unchanged		0.400401	0.102346	-0.00973149	0.955594	0.405379	0.143523	-0.0654005	0.754099	background
ENSMUSG00000021905	Dph3	-0.466654	0.286905	-0.104321	1	-0.570975	0.444626	Unchanged		-0.550409	0.126115	-0.0340038	0.892984	-0.531334	0.185591	0.0665334	0.835037	background
ENSMUSG00000022265	Ank	-0.402579	0.286905	-0.517549	0.415682	-0.920128	0.000211261	Ribo	Ribo exclusive	-0.990142	0.00126256	-0.58637	0.00170675	-1.12738	0.0312702	-0.655298	0.0352322	translation
ENSMUSG00000028580	Pum1	0.192342	0.286905	-0.0695014	1	0.12284	1	Unchanged		0.0988469	0.602281	-0.131116	0.297331	0.174093	0.425612	-0.158375	0.279682	background
ENSMUSG00000029569	Tmem168	0.390549	0.286905	0.353669	1	0.744219	0.0312615	Ribo	Ribo exclusive	0.632367	0.0346569	0.246604	0.127828	0.598868	0.123045	0.22658	0.326335	background
ENSMUSG00000030754	Copb1	0.483903	0.286905	0.121282	1	0.605185	0.184272	Unchanged		0.518759	0.101805	-0.277556	0.683469	0.622039	0.029293	-1.13005	0.054	translation
ENSMUSG00000028494	Plin2	-0.322886	0.286918	0.0426704	1	-0.280216	1	Unchanged		-0.311346	0.100125	-0.107016	0.729046	-0.284753	0.162485	0.270684	0.478515	background
ENSMUSG00000027650	Tti1	0.350108	0.286966	0.0556108	1	0.405719	0.836967	Unchanged		0.367369	0.169919	-0.0111032	0.949534	0.382469	0.150551	-0.114662	0.488671	background
ENSMUSG00000001663	Gstt1	-0.733171	0.287196	-0.201368	1	-0.93454	0.0784396	Unchanged		-1.08305	0.0157976	-0.23629	0.291758	-0.777452	0.0783681	0.0685915	0.826007	background
ENSMUSG00000034353	Ramp1	-0.677417	0.288304	-0.4975	1	-1.17492	0.00871527	Ribo	Ribo exclusive	-1.2546	0.00388237	-0.535573	0.0494581	-0.571891	0.0951246	0.136422	0.640377	abundance
ENSMUSG00000021007	Spata7	-0.642609	0.288814	-0.407178	1	-1.04979	0.0423563	Ribo	Ribo exclusive	-0.999948	0.0154021	-0.402861	0.0325614	-1.51113	0.0108843	-0.602856	0.0271753	translation
ENSMUSG00000022748	Cmss1	-0.684909	0.289431	-1.26837	0.00299085	-1.95328	8.41679e-09	RNA+Ribo	concordant (fwd)	-2.03	0.000185913	-1.23478	0.000803043	-0.845021	0.199671	-0.38032	0.455943	abundance
ENSMUSG00000028772	Zcchc17	-0.613501	0.289431	-0.0339309	1	-0.647432	0.339089	Unchanged		-0.845526	0.0287855	0.063683	0.848226	-0.801279	0.0437035	-0.284783	0.460146	translation
ENSMUSG00000022427	Tomm22	-0.641864	0.289484	0.11167	1	-0.530194	0.610533	Unchanged		-0.606387	0.118369	0.149733	0.504614	-0.643679	0.163882	0.188077	0.521149	background
ENSMUSG00000026447	Pik3c2b	0.454278	0.289945	0.158253	1	0.612531	0.161746	Unchanged		0.592613	0.0116851	0.0907152	0.68032	0.573728	0.030866	-0.0501142	0.901241	translation
ENSMUSG00000028159	Dapp1	0.762155	0.289945	0.921535	0.0390374	1.68369	0.0005462	RNA+Ribo	concordant (fwd)	1.5321	0.000715729	0.898158	0.00191253	2.14206	0.00536789	1.29193	0.0161978	translation
ENSMUSG00000028954	Nub1	-0.308178	0.289945	-0.315978	1	-0.624156	0.0490861	Ribo	Ribo exclusive	-0.639665	0.00443775	-0.294016	0.172959	-0.676411	0.0133641	-0.438436	0.310404	translation
ENSMUSG00000040151	Hs2st1	-0.522501	0.290014	0.80137	0.0059363	0.27887	1	RNA	RNA exclusive	0.263383	0.320895	0.678994	0.00218076	-0.0974866	0.848575	0.612701	0.0187364	buffering
ENSMUSG00000043162	Pyurf	-0.617258	0.29031	-0.365855	1	-0.983113	0.0147717	Ribo	Ribo exclusive	-1.06155	0.0115724	-0.33589	0.113992	-0.738076	0.119727	-0.0984778	0.764151	background
ENSMUSG00000073609	D2hgdh	-0.554399	0.29031	-0.0872838	1	-0.641683	0.235507	Unchanged		-0.675596	0.019254	0.0435088	0.918939	-0.692945	0.0218509	0.619801	0.209229	translation
ENSMUSG00000031153	Gripap1	-0.46558	0.290376	-0.203829	1	-0.669409	0.0988213	Unchanged		-0.713114	0.0155354	-0.117496	0.670654	-0.659514	0.0372806	0.181254	0.65115	translation
ENSMUSG00000037016	Frem2	0.61911	0.29095	0.664221	0.570838	1.28333	0.000271296	Ribo	Ribo exclusive	1.32118	0.000642134	0.671026	0.046629	0.808338	0.0115641	-0.498905	0.223388	translation
ENSMUSG00000036667	Tcaf1	0.473979	0.291073	0.608083	0.175207	1.08206	0.000632297	Ribo	Ribo exclusive	0.963233	0.0123252	0.385256	0.234246	0.958477	0.0413504	0.376218	0.4703	translation
ENSMUSG00000000056	Narf	-0.261416	0.291255	-0.196281	1	-0.457697	0.287173	Unchanged		-0.48329	0.0195954	-0.316854	0.105794	-0.506182	0.0474069	-0.369863	0.270718	translation
ENSMUSG00000026288	Inpp5d	0.835827	0.291255	0.587036	1	1.42286	0.00510914	Ribo	Ribo exclusive	1.20355	0.0381829	0.561619	0.0352979	0.574832	0.458188	0.340408	0.304753	abundance
ENSMUSG00000039704	Lmbrd2	0.509829	0.291755	0.0636611	1	0.57349	0.412438	Unchanged		0.682443	0.138284	-0.159379	0.652065	0.632326	0.237151	-0.059891	0.904794	background
ENSMUSG00000041891	Lman1	-0.255675	0.291755	0.0186508	1	-0.237024	1	Unchanged		-0.257958	0.164116	-0.0630479	0.727899	-0.230125	0.256324	0.0975468	0.662931	background
ENSMUSG00000050732	Vamp8	-0.495971	0.291755	-0.0313726	1	-0.527343	0.35737	Unchanged		-0.601507	0.0367697	-0.206133	0.451178	-0.674787	0.0433511	-0.407759	0.2777	translation
ENSMUSG00000064254	Ethe1	-0.455594	0.291755	-0.425669	1	-0.881263	0.00438434	Ribo	Ribo exclusive	-0.876781	0.00429698	-0.627998	0.0369205	-0.996089	0.0160881	-0.834265	0.11263	translation
ENSMUSG00000071176	Arhgef10	0.563121	0.291755	0.223671	1	0.786792	0.100306	Unchanged		0.7123	0.0344989	-0.0758223	0.879177	0.740136	0.0373146	-0.58136	0.317938	translation
ENSMUSG00000016946	Kctd5	-0.532592	0.292089	0.439714	1	-0.0928778	1	Unchanged		-0.194431	0.479673	0.38648	0.0594061	-0.378694	0.280413	0.43673	0.07229	background
ENSMUSG00000023106	Denr	-0.608534	0.292271	-0.139606	1	-0.74814	0.137493	Unchanged		-0.849589	0.0455084	-0.150414	0.566746	-0.985971	0.0328024	-0.387682	0.21612	translation
ENSMUSG00000031979	Cog2	-0.360497	0.292271	0.0876224	1	-0.272874	1	Unchanged		-0.177053	0.529758	0.0196524	0.898216	-0.203256	0.492358	0.0557837	0.740826	background
ENSMUSG00000017713	Tha1	-0.585546	0.292272	-0.0439409	1	-0.629487	0.288815	Unchanged		-0.665011	0.0560348	-0.0141764	0.955525	-0.650518	0.0636056	0.199217	0.427774	background
ENSMUSG00000026639	Lamb3	-0.87649	0.292272	-1.20219	0.04168	-2.07868	3.06336e-06	RNA+Ribo	concordant (fwd)	-2.18972	0.000299119	-1.19708	0.00267121	-1.2185	0.0918602	-0.366195	0.564735	abundance
ENSMUSG00000038264	Sema7a	0.640305	0.292272	0.129741	1	0.770046	0.136365	Unchanged		0.894804	0.0258369	-0.107534	0.834007	0.926884	0.0381029	-0.485998	0.46857	translation
ENSMUSG00000020532	Acaca	0.868449	0.292832	0.0588143	1	0.927263	0.18479	Unchanged		0.865925	0.120878	-0.0168165	0.940366	0.874705	0.175707	-0.0527087	0.850188	background
ENSMUSG00000047098	Rnf31	0.474259	0.292832	-0.0140029	1	0.460256	0.687673	Unchanged		0.654491	0.095608	-0.116832	0.503016	0.742641	0.107476	-0.179016	0.413599	background
ENSMUSG00000001056	Nhp2	-0.703966	0.293611	0.60631	0.738694	-0.0976554	1	Unchanged		-0.209343	0.564066	0.467971	0.130589	-0.601224	0.0850892	0.595242	0.0431125	buffering
ENSMUSG00000032306	Mpi	-0.554454	0.293851	-0.237969	1	-0.792423	0.0551083	Unchanged		-0.805789	0.0260597	-0.310814	0.213185	-0.400533	0.121668	0.167011	0.416443	background
ENSMUSG00000028911	Srsf4	-0.27985	0.294202	-0.276073	1	-0.555923	0.047505	Ribo	Ribo exclusive	-0.565121	0.00749528	-0.29429	0.0437254	-0.53203	0.0479723	-0.252741	0.318611	translation
ENSMUSG00000034157	Cipc	-0.495134	0.294202	-0.240768	1	-0.735902	0.0601949	Unchanged		-0.759651	0.0146188	-0.211848	0.358391	-0.561635	0.0521257	0.19482	0.468835	background
ENSMUSG00000066637	Ttc32	0.941694	0.294202	-0.50445	1	0.437244	1	Unchanged		0.0779494	0.906026	-0.508454	0.00601968	0.527546	0.652585	-0.511723	0.0220275	buffering
ENSMUSG00000066979	Bub3	-0.38333	0.294202	0.289785	1	-0.0935459	1	Unchanged		-0.0974691	0.720282	0.0383745	0.925796	-0.102309	0.751981	0.0680304	0.890797	background
ENSMUSG00000067336	Bmpr2	0.431786	0.294202	-0.162692	1	0.269093	1	Unchanged		0.323828	0.295423	-0.298612	0.19172	0.421469	0.268479	-0.352935	0.209229	background
ENSMUSG00000073755	5730409E04Rik	-0.592158	0.294297	0.515549	0.895896	-0.0766088	1	Unchanged		-0.146981	0.67127	0.427952	0.0364409	0.146229	0.771906	0.398115	0.08443	background
ENSMUSG00000003099	Ppp5c	-0.30987	0.294638	-0.279595	1	-0.589465	0.0469527	Ribo	Ribo exclusive	-0.588091	0.013056	-0.331819	0.0149168	-0.307384	0.375044	-0.220859	0.218578	abundance
ENSMUSG00000006024	Napa	-0.328251	0.296107	-0.240671	1	-0.568922	0.05665	Unchanged		-0.603674	0.0118999	-0.207419	0.206977	-0.485561	0.0703838	-0.0183496	0.950318	background
ENSMUSG00000006010	Odr4	0.472657	0.297407	-0.043792	1	0.428865	1	Unchanged		0.487826	0.185339	-0.254908	0.446988	0.552639	0.203745	-0.345997	0.410066	background
ENSMUSG00000019923	Zwint	-0.556646	0.297407	-0.0751114	1	-0.631757	0.169566	Unchanged		-0.736471	0.0262604	-0.133273	0.560163	-0.584364	0.0479526	0.221958	0.348243	translation
ENSMUSG00000032232	Cgnl1	0.536077	0.297662	-0.40219	1	0.133887	1	Unchanged		0.164217	0.653326	-0.391918	0.104554	0.308961	0.512776	-0.416934	0.142351	background
ENSMUSG00000039763	Dnajc28	-0.576211	0.297662	-0.88581	0.0612073	-1.46202	3.13971e-06	Ribo	Ribo exclusive	-1.64468	0.00188033	-0.896769	0.00118944	-0.926233	0.287263	-0.641929	0.0921973	abundance
ENSMUSG00000072620	Slfn2	0.729972	0.297698	0.582418	0.63675	1.31239	0.0127557	Ribo	Ribo exclusive	1.14117	0.0199294	0.476224	0.0589088	0.540963	0.317266	0.147612	0.645538	background
ENSMUSG00000074922	Fam122a	-0.402665	0.297698	-0.0777597	1	-0.480425	0.483278	Unchanged		-0.469953	0.0164103	0.0274318	0.934697	-0.469301	0.0349536	-0.0338901	0.95867	translation
ENSMUSG00000038002	Cramp1l	0.435406	0.298399	-0.228556	1	0.20685	1	Unchanged		0.192592	0.418051	-0.445124	0.163316	0.0292337	0.919739	-0.270558	0.421322	background
ENSMUSG00000031840	Rab3a	-0.531699	0.298438	-0.536797	0.984892	-1.0685	0.000681322	Ribo	Ribo exclusive	-1.10822	0.00258979	-0.456104	0.100554	-0.649493	0.0221565	0.353148	0.205818	translation
ENSMUSG00000016921	Srsf6	-0.318375	0.298733	-0.353386	1	-0.671761	0.0105735	Ribo	Ribo exclusive	-0.723956	0.00403894	-0.298736	0.148668	-0.857909	0.00629419	-0.63435	0.078524	translation
ENSMUSG00000027012	Dync1i2	0.23556	0.298733	0.045161	1	0.280721	1	Unchanged		0.259199	0.187052	-0.350915	0.564465	0.256421	0.260259	-0.314206	0.727651	background
ENSMUSG00000021068	Nin	0.629204	0.298787	0.647716	0.380566	1.27692	0.00279382	Ribo	Ribo exclusive	1.36932	0.0163152	0.440725	0.179771	0.850356	0.113463	-0.067443	0.878991	background
ENSMUSG00000032698	Lmo2	-0.640574	0.298787	0.982764	0.0284521	0.34219	1	RNA	RNA exclusive	0.263786	0.503375	0.862622	0.00539537	-0.064356	0.928514	0.817412	0.026817	buffering
ENSMUSG00000040296	Ddx58	0.592779	0.298787	0.608551	0.473875	1.20133	0.00129706	Ribo	Ribo exclusive	1.12251	0.00791837	0.539678	0.0174932	0.56374	0.288431	0.255724	0.396929	abundance
ENSMUSG00000051456	Hspb3	-0.78558	0.298787	0.224986	1	-0.560593	0.672281	Unchanged		-0.597345	0.107168	0.222859	0.558832	-0.749919	0.0399708	0.603779	0.116914	translation
ENSMUSG00000057421	Las1l	0.412895	0.298787	-0.499412	0.51295	-0.0865179	1	Unchanged		-0.0255273	0.932472	-0.496743	0.00882728	0.237959	0.593629	-0.492006	0.0279944	buffering
ENSMUSG00000044018	Mrpl50	-0.514415	0.299199	-0.299645	1	-0.81406	0.0195188	Ribo	Ribo exclusive	-0.906383	0.00590035	-0.413117	0.0771001	-1.03758	0.0164557	-0.578004	0.134613	translation
ENSMUSG00000035413	Tmem98	-0.432959	0.29979	0.828201	0.00418367	0.395242	1	RNA	RNA exclusive	0.345009	0.109372	0.863546	0.00143238	-0.200166	0.474167	0.550035	0.0279944	buffering
ENSMUSG00000034801	Sos2	0.398618	0.30004	-0.253557	1	0.145061	1	Unchanged		0.19358	0.56656	-0.328976	0.0254865	-0.210012	0.694628	-0.303635	0.0709979	background
ENSMUSG00000066036	Ubr4	0.638181	0.30004	-0.0443027	1	0.593879	0.505675	Unchanged		0.907728	0.0574404	-0.100972	0.602341	1.14223	0.0105132	-0.326158	0.0860436	translation
ENSMUSG00000002496	Tsc2	0.369705	0.30057	-0.158579	1	0.211126	1	Unchanged		0.269581	0.362163	-0.266069	0.2376	0.38107	0.278582	-0.328832	0.218607	background
ENSMUSG00000040441	Slc26a10	0.974156	0.30057	0.128265	1	1.10242	0.107367	Unchanged		0.863113	0.077506	0.0199957	0.971761	0.84886	0.0621828	-0.501288	0.312854	background
ENSMUSG00000042055	Wdr11	0.354241	0.30057	0.12212	1	0.476361	0.381822	Unchanged		0.475172	0.0316975	0.116254	0.446515	0.500479	0.0560076	0.165006	0.457398	background
ENSMUSG00000039485	Tspyl4	-0.39146	0.300906	-0.198547	1	-0.590007	0.126696	Unchanged		-0.631998	0.0110442	-0.120363	0.615702	-0.594272	0.0310672	0.116697	0.778772	translation
ENSMUSG00000029176	Anapc4	0.352544	0.30102	0.103799	1	0.456344	0.339089	Unchanged		0.482296	0.0421732	-0.00855329	0.974607	0.483464	0.0743133	-0.0852053	0.824804	background
ENSMUSG00000031885	Cbfb	-0.457966	0.301074	0.484025	0.735706	0.0260586	1	Unchanged		0.0208166	0.934211	0.295972	0.260261	0.0642957	0.834038	0.301356	0.328452	background
ENSMUSG00000032602	Slc25a20	-0.487833	0.301074	-0.511284	0.710494	-0.999118	0.000821139	Ribo	Ribo exclusive	-1.07058	0.000587551	-0.596875	0.0253031	-0.697352	0.0221061	0.218477	0.621855	translation
ENSMUSG00000016664	Pacsin2	-0.303304	0.301299	-0.0475678	1	-0.350872	0.873947	Unchanged		-0.364356	0.0704477	-0.115568	0.488834	-0.258684	0.175091	0.165524	0.305082	background
ENSMUSG00000059555	Tor4a	0.966103	0.302012	0.719599	0.321809	1.6857	0.000803446	Ribo	Ribo exclusive	1.72186	0.00196566	0.706275	0.000965749	1.65835	0.121478	0.693334	0.0301522	abundance
ENSMUSG00000040771	Oard1	-0.592761	0.302342	-0.186836	1	-0.779597	0.174971	Unchanged		-0.975364	0.0408051	-0.24069	0.262935	-1.22861	0.0311743	-0.405185	0.145372	translation
ENSMUSG00000037151	Lrrc20	-0.533225	0.303132	0.231176	1	-0.302049	1	Unchanged		-0.317917	0.247458	0.151132	0.50239	-0.40132	0.183887	0.260526	0.311945	background
ENSMUSG00000020689	Itgb3	1.14731	0.304139	0.490431	1	1.63774	0.00886664	Ribo	Ribo exclusive	1.48511	0.00460594	0.505189	0.114149	1.15234	0.0521795	0.114681	0.836933	background
ENSMUSG00000027605	Acss2	-0.328842	0.304139	0.00488767	1	-0.323954	1	Unchanged		-0.319883	0.110052	-0.321465	0.523194	-0.310253	0.179866	-0.213351	0.793513	background
ENSMUSG00000024219	Anks1	-0.350126	0.305317	-0.532735	0.324024	-0.882862	0.000408002	Ribo	Ribo exclusive	-0.927928	0.00163308	-0.52619	0.00242466	-0.383188	0.357791	-0.268632	0.240723	abundance
ENSMUSG00000028104	Polr3gl	-0.703228	0.305317	-0.481835	1	-1.18506	0.00679706	Ribo	Ribo exclusive	-1.24586	0.0120846	-0.577863	0.00844592	-1.31712	0.10249	-0.598577	0.0576941	abundance
ENSMUSG00000028164	Manba	0.420257	0.305374	0.41708	1	0.837336	0.00563464	Ribo	Ribo exclusive	0.863482	0.00586152	0.301868	0.170352	0.625436	0.049099	-0.0941919	0.786268	translation
ENSMUSG00000029426	Scarb2	0.228254	0.305851	-0.268567	1	-0.0403138	1	Unchanged		-0.0668605	0.731864	-0.292944	0.0468052	-0.104009	0.683462	-0.300797	0.0888196	background
ENSMUSG00000029655	N4bp2l2	0.409065	0.305992	-0.270267	1	0.138798	1	Unchanged		0.109353	0.745604	-0.418899	0.0899179	0.200314	0.653685	-0.432471	0.140027	background
ENSMUSG00000029169	Dhx15	0.325916	0.306005	-0.229075	1	0.0968406	1	Unchanged		0.0924054	0.641139	-0.259668	0.144363	0.116005	0.64002	-0.271563	0.206624	background
ENSMUSG00000028468	Rgp1	0.425715	0.306251	0.182879	1	0.608594	0.180973	Unchanged		0.627402	0.0372138	-0.00745739	0.983238	0.627663	0.071411	-0.0292295	0.952922	background
ENSMUSG00000028334	Nans	-0.474045	0.306824	0.729706	0.0775753	0.255661	1	Unchanged		0.203186	0.460236	0.552505	0.0417447	-0.0604123	0.873075	0.452083	0.123924	background
ENSMUSG00000008604	Ubqln4	-0.367433	0.307657	-0.0646086	1	-0.432042	0.42286	Unchanged		-0.471081	0.0580709	-0.233946	0.409382	-0.494019	0.0936653	-0.305869	0.455943	background
ENSMUSG00000021585	Cast	-0.336844	0.307664	-0.152622	1	-0.489466	0.274662	Unchanged		-0.516794	0.0634849	-0.24602	0.120474	-0.454606	0.213231	-0.212982	0.325131	background
ENSMUSG00000025332	Kdm5c	0.465558	0.307664	-0.0101648	1	0.455393	0.76644	Unchanged		0.549063	0.100345	-0.126296	0.538566	0.620272	0.107799	-0.215829	0.40302	background
ENSMUSG00000027366	Sppl2a	0.326619	0.307664	0.0054101	1	0.332029	1	Unchanged		0.258373	0.311937	-0.0333114	0.813095	0.287853	0.310774	-0.0675691	0.680007	background
ENSMUSG00000028990	Lzic	-0.397813	0.307664	-0.360066	1	-0.757879	0.0139732	Ribo	Ribo exclusive	-0.784846	0.00499914	-0.34657	0.0738567	-0.785053	0.0292775	-0.346842	0.301941	translation
ENSMUSG00000030376	Slc8a2	0.885286	0.307664	0.996674	0.112359	1.88196	0.000628236	Ribo	Ribo exclusive	1.55743	0.00287986	1.0298	0.00527834	2.19516	0.00843918	1.46544	0.0184128	translation
ENSMUSG00000030579	Tyrobp	0.961311	0.307664	1.09233	0.134497	2.05364	4.69853e-05	Ribo	Ribo exclusive	2.06501	0.000733907	0.996482	0.0183476	1.32721	0.0446489	0.115094	0.880069	translation
ENSMUSG00000039109	F13a1	0.66185	0.307664	0.315236	1	0.977086	0.0232927	Ribo	Ribo exclusive	0.84322	0.0137353	0.11039	0.782893	0.76424	0.00914552	-0.701959	0.0529681	translation
ENSMUSG00000071014	Ndufb6	-0.499756	0.307664	-0.24342	1	-0.743175	0.0599031	Unchanged		-0.885373	0.0112313	-0.299771	0.0566617	-0.973432	0.0478274	-0.33912	0.144422	translation
ENSMUSG00000028005	Gucy1b1	0.711666	0.308062	0.294894	1	1.00656	0.0498964	Ribo	Ribo exclusive	0.795968	0.0941497	0.184809	0.473259	0.479419	0.1817	-0.123916	0.582952	background
ENSMUSG00000050530	Fam171a1	0.521472	0.30822	0.562796	0.418204	1.08427	0.0060263	Ribo	Ribo exclusive	0.956129	0.00217581	0.605254	0.0120131	0.975825	0.027411	0.627027	0.139884	translation
ENSMUSG00000003068	Stk11	-0.381658	0.308474	-0.267108	1	-0.648766	0.0687585	Unchanged		-0.686821	0.0109025	-0.456995	0.123258	-0.927456	0.00404532	-1.06172	0.0175169	translation
ENSMUSG00000029468	P2rx7	0.639876	0.308608	0.924159	0.00898132	1.56403	0.00029679	RNA+Ribo	concordant (fwd)	1.60185	0.000462828	0.852748	0.000679754	1.70054	0.0401165	0.89419	0.0342822	translation
ENSMUSG00000024234	Mtpap	0.400627	0.308968	-0.233971	1	0.166656	1	Unchanged		0.205818	0.380612	-0.483387	0.203178	0.158346	0.591481	-0.408784	0.389908	background
ENSMUSG00000035847	Ids	0.672582	0.308968	0.229219	1	0.901801	0.121911	Unchanged		0.847279	0.00471725	0.231492	0.11836	0.657523	0.0612988	0.0805822	0.745826	background
ENSMUSG00000036934	4921524J17Rik	-0.719696	0.308968	0.075188	1	-0.644508	0.316214	Unchanged		-0.760655	0.0255228	0.110846	0.68032	-0.763337	0.0556531	0.121038	0.776468	background
ENSMUSG00000005882	Uqcc1	-0.592123	0.309135	-0.411756	1	-1.00388	0.0124459	Ribo	Ribo exclusive	-1.07662	0.0189312	-0.407733	0.0520743	-1.03277	0.10374	-0.38812	0.202744	background
ENSMUSG00000068523	Gng5	0.799677	0.309135	-0.0157574	1	0.78392	0.252733	Unchanged		0.684319	0.116205	0.0534617	0.91509	0.682348	0.179448	0.0294762	0.965875	background
ENSMUSG00000014846	Tppp3	-0.676967	0.309481	-0.579352	0.919703	-1.25632	0.00171261	Ribo	Ribo exclusive	-1.17422	0.00302995	-0.62183	0.0579674	-0.651235	0.056499	0.206682	0.608688	background
ENSMUSG00000020150	Gamt	-0.733719	0.309605	0.344754	1	-0.388965	1	Unchanged		-0.465189	0.152457	0.301087	0.412202	-0.547184	0.147155	0.45746	0.319378	background
ENSMUSG00000024359	Hspa9	-0.185448	0.309605	-0.382055	0.621078	-0.567503	0.00469589	Ribo	Ribo exclusive	-0.589547	0.00486232	-0.468328	0.00599281	-0.58675	0.0454957	-0.465045	0.11951	translation
ENSMUSG00000027466	Rbck1	-0.452636	0.309605	0.337358	1	-0.115279	1	Unchanged		-0.182496	0.581813	0.2695	0.0623286	0.305506	0.440846	0.230594	0.134339	background
ENSMUSG00000000001	Gnai3	0.565642	0.3105	0.399427	1	0.965069	0.0105824	Ribo	Ribo exclusive	1.00795	0.0121666	0.367045	0.0659164	0.869685	0.0987996	0.285764	0.340962	background
ENSMUSG00000021037	Ahsa1	-0.364415	0.3105	-0.149261	1	-0.513675	0.521134	Unchanged		-0.581226	0.0335014	-0.312237	0.218617	-0.632646	0.0596836	-0.405922	0.283291	background
ENSMUSG00000024856	Cdk2ap2	-0.576664	0.3105	0.342532	1	-0.234133	1	Unchanged		-0.298737	0.405348	0.455117	0.0911846	-0.619887	0.139279	0.564515	0.0624616	background
ENSMUSG00000025584	Pde8a	0.540324	0.3105	0.10452	1	0.644844	0.318712	Unchanged		0.586393	0.179622	-0.137503	0.738364	0.649905	0.174577	-0.326664	0.486729	background
ENSMUSG00000028413	B4galt1	0.383552	0.3105	0.314109	1	0.697661	0.0207899	Ribo	Ribo exclusive	0.627642	0.0109025	0.197121	0.357067	0.462806	0.0335197	-0.33242	0.131134	translation
ENSMUSG00000048546	Tob2	-0.545623	0.3105	-0.960699	0.032716	-1.50632	1.22874e-06	RNA+Ribo	concordant (fwd)	-1.44558	0.000359875	-0.924524	0.0055991	-0.534191	0.0423165	0.330686	0.222274	translation
ENSMUSG00000064127	Med14	0.349621	0.3105	0.0401623	1	0.389783	0.810175	Unchanged		0.313353	0.204281	-0.0650691	0.732409	0.341059	0.220586	-0.131989	0.566948	background
ENSMUSG00000079426	Arpc4	-0.509255	0.3105	0.543914	0.843976	0.0346587	1	Unchanged		-0.0615792	0.872181	0.27437	0.502561	-0.250962	0.367101	0.33264	0.256087	background
ENSMUSG00000096010	Hist4h4	-0.730766	0.3105	0.76958	0.422371	0.0388139	1	Unchanged		-0.00774891	0.984175	0.65072	0.0582733	-0.0627196	0.899949	0.65144	0.109971	background
ENSMUSG00000011382	Dhdh	-0.623575	0.310998	-0.330402	1	-0.953976	0.0254786	Ribo	Ribo exclusive	-0.973943	0.0103863	-0.282303	0.289682	-0.756853	0.0525507	0.0987048	0.808631	background
ENSMUSG00000030286	Emc3	-0.370319	0.310998	0.207704	1	-0.162614	1	Unchanged		-0.257191	0.397777	0.156412	0.246634	-0.449858	0.213595	0.191892	0.220872	background
ENSMUSG00000025511	Tspan4	0.676166	0.311859	0.702523	0.707191	1.37869	0.000826929	Ribo	Ribo exclusive	1.23742	0.00388199	0.647242	0.0519347	0.610045	0.083207	-0.169539	0.651521	background
ENSMUSG00000040661	Rad54l2	0.503439	0.311859	0.0630551	1	0.566494	0.649863	Unchanged		0.519689	0.0649952	-0.171657	0.641654	0.557239	0.0826984	-0.370887	0.445464	background
ENSMUSG00000055632	Hmcn2	0.797085	0.311859	-0.599539	1	0.197546	1	Unchanged		-0.0397037	0.942108	-0.708285	0.0330953	0.667527	0.250154	-0.693641	0.038337	buffering
ENSMUSG00000057969	Sema3b	-0.412916	0.311859	0.925731	0.00094643	0.512815	0.358368	RNA	RNA exclusive	0.480756	0.0372351	0.786633	0.00654979	0.377155	0.262192	0.673966	0.096494	abundance
ENSMUSG00000063888	Rpl7l1	-0.433534	0.311859	-0.0272878	1	-0.460822	0.59506	Unchanged		-0.543512	0.111847	0.0137122	0.955585	-0.532267	0.144448	-0.117789	0.654788	background
ENSMUSG00000024997	Prdx3	-0.425998	0.31196	-0.357549	1	-0.783547	0.0106146	Ribo	Ribo exclusive	-0.787214	0.0107365	-0.470131	0.0256366	-0.83252	0.0563071	-0.504422	0.122605	abundance
ENSMUSG00000029647	Pan3	0.662985	0.311998	-0.282099	1	0.380887	1	Unchanged		0.409859	0.28745	-0.27931	0.113722	0.475188	0.366378	-0.293684	0.180643	background
ENSMUSG00000033436	Armcx2	0.905485	0.312336	1.17427	0.0012301	2.07975	4.05069e-06	RNA+Ribo	concordant (fwd)	1.82639	0.000587551	1.14404	0.00015329	2.13114	0.0660891	1.2285	0.0137857	abundance
ENSMUSG00000004558	Ndrg2	-0.393024	0.312359	-0.128804	1	-0.521827	0.275718	Unchanged		-0.597608	0.0208115	-0.213041	0.223247	-0.476966	0.104934	-0.0536489	0.850353	background
ENSMUSG00000028879	Stx12	-0.386185	0.312359	0.0184704	1	-0.367714	0.682604	Unchanged		-0.38403	0.15034	0.0531174	0.809423	-0.393421	0.203119	0.090293	0.758486	background
ENSMUSG00000032575	Manf	-0.66993	0.312359	0.920293	0.102805	0.250363	1	Unchanged		0.115772	0.738025	0.834811	0.0166618	-0.40208	0.310055	0.761775	0.0296896	buffering
ENSMUSG00000039428	Tmem135	0.330666	0.312983	-0.718369	0.00300177	-0.387703	0.873333	RNA	RNA exclusive	-0.365398	0.119412	-0.713869	0.000371123	-0.382745	0.490831	-0.716801	0.00728131	buffering
ENSMUSG00000001666	Ddt	-0.529136	0.313213	-0.549174	0.692855	-1.07831	0.000785538	Ribo	Ribo exclusive	-1.10102	0.00234783	-0.57122	0.0129597	-0.700601	0.117293	-0.252034	0.473943	abundance
ENSMUSG00000027566	Psma7	-0.333166	0.313213	0.0486859	1	-0.28448	1	Unchanged		-0.278366	0.226635	-0.107764	0.692576	-0.319187	0.197783	-0.276795	0.360284	background
ENSMUSG00000032656	March3	0.893916	0.313213	0.857812	0.230355	1.75173	0.00350629	Ribo	Ribo exclusive	1.62806	0.0016955	0.790065	0.0257068	1.25721	0.049099	0.38129	0.533141	translation
ENSMUSG00000033653	Vps8	0.431713	0.313213	0.0183143	1	0.450027	0.514765	Unchanged		0.439818	0.128721	-0.144372	0.641654	0.543565	0.045573	-0.482395	0.0890244	translation
ENSMUSG00000038368	Focad	0.399802	0.313213	-0.0364579	1	0.363344	0.984513	Unchanged		0.380813	0.106771	0.0449447	0.868196	0.373312	0.165861	-0.0363871	0.925415	background
ENSMUSG00000047714	Ppp1r2	-0.564913	0.313213	-0.0151721	1	-0.580085	0.607999	Unchanged		-0.508795	0.203854	-0.192323	0.485907	-0.472805	0.326681	-0.155459	0.66746	background
ENSMUSG00000052698	Tln2	0.320345	0.313213	0.192241	1	0.512586	0.153397	Unchanged		0.470498	0.0432498	0.129472	0.272258	0.415998	0.154836	0.103715	0.514831	background
ENSMUSG00000075470	Alg10b	0.461599	0.313213	-0.164125	1	0.297474	1	Unchanged		0.201632	0.410798	-0.375422	0.246619	0.120875	0.692408	-0.276801	0.475689	background
ENSMUSG00000020737	Jpt1	-0.412022	0.313388	0.617208	0.248253	0.205186	1	Unchanged		0.155341	0.586545	0.476532	0.0401385	-0.18084	0.606184	0.404062	0.0898555	background
ENSMUSG00000019947	Arid5b	0.459687	0.313681	0.321139	1	0.780826	0.0332123	Ribo	Ribo exclusive	0.733317	0.0189312	0.313214	0.120474	0.722199	0.070676	0.302623	0.326875	background
ENSMUSG00000009741	Ubp1	0.372261	0.313698	-0.140652	1	0.231609	1	Unchanged		0.181167	0.535005	-0.220152	0.103344	0.334951	0.399056	-0.236519	0.142329	background
ENSMUSG00000061731	Ext1	0.473384	0.314885	0.398248	1	0.871632	0.0310802	Ribo	Ribo exclusive	0.811657	0.0116683	0.306641	0.115328	0.417805	0.143097	-0.0694525	0.771085	background
ENSMUSG00000026781	Acbd5	-0.410384	0.314894	0.11983	1	-0.290553	1	Unchanged		-0.298052	0.196709	0.216179	0.38166	-0.333712	0.218966	0.284456	0.37453	background
ENSMUSG00000039130	Zc3hc1	0.419724	0.314894	0.113894	1	0.533617	0.391063	Unchanged		0.471711	0.109372	0.127064	0.420076	0.409071	0.245473	0.0818053	0.704048	background
ENSMUSG00000029178	Klf3	0.428361	0.316106	-0.181314	1	0.247047	1	Unchanged		0.16418	0.49201	-0.305594	0.177983	0.299042	0.265645	-0.387427	0.129548	background
ENSMUSG00000005534	Insr	0.353557	0.31653	-0.0994286	1	0.254128	1	Unchanged		0.225368	0.33904	-0.185356	0.339218	0.366534	0.126676	-0.311974	0.118089	background
ENSMUSG00000032398	Snapc5	-0.639273	0.317111	-0.106787	1	-0.74606	0.185484	Unchanged		-0.81591	0.0504264	-0.130283	0.475206	-0.680808	0.143645	-0.0197547	0.941736	background
ENSMUSG00000046603	Tcaim	-0.603477	0.317111	-0.510499	1	-1.11398	0.00439559	Ribo	Ribo exclusive	-1.14563	0.00704372	-0.449687	0.206667	-1.32394	0.0117159	-0.807025	0.148431	translation
ENSMUSG00000025366	Esyt1	0.481546	0.317595	0.762672	0.0622405	1.24422	1.77201e-05	Ribo	Ribo exclusive	1.19404	0.00101056	0.614534	0.0225919	0.714023	0.0465314	-0.0699685	0.876724	translation
ENSMUSG00000002580	Mien1	-0.473141	0.318661	0.059133	1	-0.414008	0.785987	Unchanged		-0.445776	0.110414	0.017449	0.926317	-0.455405	0.147132	0.0859649	0.708399	background
ENSMUSG00000023175	Bsg	-0.440998	0.319442	-0.144607	1	-0.585605	0.205993	Unchanged		-0.611233	0.0292204	-0.212576	0.302822	-0.467291	0.120839	0.0126806	0.968066	background
ENSMUSG00000025969	Nrp2	0.589163	0.319442	0.774409	0.253924	1.36357	0.000130908	Ribo	Ribo exclusive	1.34866	0.00116807	0.397548	0.508065	1.22208	0.00485981	-0.869116	0.381119	translation
ENSMUSG00000034994	Eef2	0.512101	0.319442	0.126496	1	0.638597	0.198047	Unchanged		0.596501	0.0782553	0.0443332	0.852841	0.601265	0.126195	0.0669314	0.841523	background
ENSMUSG00000029723	Tsc22d4	-0.398437	0.319777	0.167842	1	-0.230595	1	Unchanged		-0.298678	0.237514	0.0630957	0.776427	-0.269086	0.337691	-0.0325989	0.909202	background
ENSMUSG00000040250	Ints13	0.511472	0.319777	-0.2	1	0.311472	1	Unchanged		0.242152	0.35915	-0.255444	0.0919691	0.247693	0.502875	-0.256764	0.169356	background
ENSMUSG00000047036	Zfp445	0.482318	0.319777	-0.642666	0.254622	-0.160348	1	Unchanged		-0.290286	0.399837	-0.678379	0.00499682	-0.623489	0.274329	-0.725775	0.0167921	buffering
ENSMUSG00000033960	Jcad	0.674684	0.319957	-0.0752598	1	0.599425	0.395037	Unchanged		0.429826	0.341234	-0.254937	0.415182	0.686624	0.110489	-0.433488	0.151739	background
ENSMUSG00000008958	Vps72	-0.309766	0.319986	0.113864	1	-0.195902	1	Unchanged		-0.205211	0.358992	0.124653	0.38888	-0.192852	0.483916	0.117433	0.516325	background
ENSMUSG00000040652	Oaz2	-0.685294	0.319986	-0.0830161	1	-0.76831	0.179666	Unchanged		-0.743611	0.084424	-0.115636	0.617707	-0.595669	0.161199	0.083773	0.763598	background
ENSMUSG00000044066	Cep68	-0.318906	0.319986	-0.299343	1	-0.618249	0.0390358	Ribo	Ribo exclusive	-0.64183	0.0094195	-0.371304	0.0277873	-0.569414	0.0855211	-0.30924	0.240723	abundance
ENSMUSG00000053870	Fpgt	0.539963	0.319986	-0.0456281	1	0.494335	0.771134	Unchanged		0.415705	0.157548	-0.157625	0.540254	0.470688	0.16289	-0.259052	0.416445	background
ENSMUSG00000027244	Atg13	0.443969	0.321563	-0.841089	0.0289459	-0.39712	0.657596	RNA	RNA exclusive	-0.353656	0.139435	-0.765265	0.0136084	0.0202745	0.948825	-0.450395	0.143962	background
ENSMUSG00000048832	Vps37c	-0.410883	0.322545	0.396025	1	-0.0148579	1	Unchanged		-0.0228827	0.92709	0.276586	0.283425	-0.111321	0.684929	0.289403	0.302796	background
ENSMUSG00000000976	Heatr6	0.36619	0.323074	0.157772	1	0.523962	0.597905	Unchanged		0.607253	0.0304619	0.143189	0.225723	0.386326	0.258952	0.0712229	0.653594	background
ENSMUSG00000021610	Clptm1l	0.411711	0.323074	0.353354	1	0.765065	0.0301054	Ribo	Ribo exclusive	0.736777	0.00393855	0.12928	0.723736	0.727322	0.0136045	-0.0433006	0.95551	translation
ENSMUSG00000022553	Maf1	-0.336984	0.323074	-0.146716	1	-0.4837	0.264025	Unchanged		-0.510095	0.0626859	-0.294424	0.19342	-0.487867	0.150832	-0.267216	0.410066	background
ENSMUSG00000024194	Cuta	-0.497341	0.323074	-0.0197342	1	-0.517076	0.370601	Unchanged		-0.580752	0.0689533	0.0730304	0.818295	-0.60722	0.0901575	0.246595	0.534064	background
ENSMUSG00000028932	Psmc2	-0.304237	0.323074	-0.151498	1	-0.455735	0.456166	Unchanged		-0.428938	0.0836314	-0.235735	0.17882	-0.418733	0.17905	-0.226795	0.350298	background
ENSMUSG00000029992	Gfpt1	0.394776	0.323501	0.0338123	1	0.428588	0.689503	Unchanged		0.391082	0.106715	-0.00482586	0.983194	0.392239	0.156525	-0.0606338	0.829734	background
ENSMUSG00000050730	Arhgap42	0.600096	0.323501	-0.0977318	1	0.502364	1	Unchanged		0.177256	0.838734	-0.192355	0.356022	0.143752	0.895652	-0.190872	0.439185	background
ENSMUSG00000001506	Col1a1	0.804389	0.323594	2.5912	2.08876e-07	3.39559	5.80507e-14	RNA+Ribo	concordant (fwd)	3.24061	5.30435e-06	2.23009	0.00810047	2.47568	0.000819083	-1.6483	0.420859	translation
ENSMUSG00000025872	Thoc3	-0.369268	0.324248	0.0818792	1	-0.287389	1	Unchanged		-0.286264	0.226534	0.104681	0.59431	-0.282685	0.309229	0.0981172	0.709528	background
ENSMUSG00000021665	Hexb	0.49834	0.324423	1.03002	0.00144867	1.52836	6.12091e-08	RNA+Ribo	concordant (fwd)	1.49207	0.000160415	0.691514	0.181192	1.29188	0.00226956	-0.827386	0.454216	translation
ENSMUSG00000020169	Best3	0.441649	0.32511	-0.692676	0.0763058	-0.251027	1	Unchanged		-0.307766	0.213765	-0.576969	0.0524553	-0.136457	0.684713	-0.422181	0.235807	background
ENSMUSG00000039652	Cpeb3	0.356814	0.32511	-0.391198	1	-0.0343845	1	Unchanged		-0.0469168	0.854344	-0.456922	0.0153292	0.12347	0.73201	-0.445835	0.0410886	buffering
ENSMUSG00000039262	Prrc2b	0.360237	0.325742	-0.062203	1	0.298034	1	Unchanged		0.230703	0.350171	-0.12646	0.468969	0.256989	0.380006	-0.148185	0.488671	background
ENSMUSG00000056234	Ncoa4	1.22485	0.325742	-0.290806	1	0.934044	0.27188	Unchanged		0.802742	0.104608	-0.00923967	0.989789	0.804473	0.155645	-0.192053	0.82115	background
ENSMUSG00000079316	Rab9	-0.556723	0.325742	-0.589307	0.536926	-1.14603	0.00482165	Ribo	Ribo exclusive	-1.20646	0.00686415	-0.597142	0.00408136	-2.12314	0.00526013	-0.861176	0.00819003	translation
ENSMUSG00000002803	Btbd6	-0.452188	0.325809	0.00924036	1	-0.442947	1	Unchanged		-0.484613	0.0861087	-0.173498	0.537768	-0.573924	0.0620034	-0.417676	0.205843	background
ENSMUSG00000027002	Nckap1	0.575249	0.325809	0.165115	1	0.740364	0.126579	Unchanged		0.537586	0.23922	0.0283202	0.922802	0.496767	0.191409	-0.174501	0.463877	background
ENSMUSG00000040044	Orc3	0.369137	0.325809	-0.225787	1	0.14335	1	Unchanged		0.141821	0.621923	-0.279121	0.0885331	-0.130586	0.725058	-0.241596	0.177876	background
ENSMUSG00000041361	Myzap	-0.330744	0.325809	-0.314177	1	-0.644921	0.0463871	Ribo	Ribo exclusive	-0.712705	0.0143812	-0.404772	0.0303658	-0.405384	0.265834	-0.200836	0.430763	abundance
ENSMUSG00000028849	Map7d1	-0.411611	0.32587	-0.245341	1	-0.656952	0.058637	Unchanged		-0.733885	0.00625878	-0.326738	0.129307	-0.867	0.0104616	-0.585237	0.103044	translation
ENSMUSG00000042406	Atf4	-0.4921	0.32587	-0.013998	1	-0.506098	0.564039	Unchanged		-0.467885	0.07534	-0.249591	0.53775	-0.419677	0.15732	-0.00649461	0.991666	background
ENSMUSG00000039740	Alg2	0.666744	0.326229	0.247952	1	0.914696	0.0267587	Ribo	Ribo exclusive	1.0398	0.0049436	0.220811	0.218464	0.846179	0.0398281	0.0197965	0.950597	translation
ENSMUSG00000020464	Pnpt1	0.356448	0.326394	-0.269943	1	0.086505	1	Unchanged		0.079064	0.775799	-0.293889	0.0515085	0.0834348	0.841337	-0.294185	0.102573	background
ENSMUSG00000025583	Rptor	0.407802	0.326453	0.0274109	1	0.435213	0.487273	Unchanged		0.523728	0.087589	-0.13054	0.649524	0.525854	0.143523	-0.137252	0.739251	background
ENSMUSG00000035203	Epn1	-0.395025	0.326453	-0.242149	1	-0.637174	0.0880283	Unchanged		-0.667436	0.0229267	-0.412548	0.126084	-0.780072	0.0352505	-0.587172	0.147661	translation
ENSMUSG00000028470	Hint2	-0.3791	0.327201	-0.409921	0.984794	-0.789021	0.00451876	Ribo	Ribo exclusive	-0.847899	0.00335402	-0.540766	0.0166618	-0.654379	0.0762487	-0.319363	0.396245	abundance
ENSMUSG00000038299	Wdr36	0.351536	0.327415	-0.0512213	1	0.300314	1	Unchanged		0.298503	0.250229	-0.115282	0.449664	0.229978	0.459442	-0.0713011	0.719369	background
ENSMUSG00000054091	1810037I17Rik	-0.724402	0.327443	0.0596623	1	-0.66474	0.502766	Unchanged		-0.785538	0.0531301	0.158581	0.618503	-0.872314	0.0557116	0.380994	0.339393	background
ENSMUSG00000032977	Fam207a	-0.577367	0.32754	0.495053	1	-0.0823137	1	Unchanged		-0.153983	0.669075	0.511109	0.00577102	-0.466946	0.453868	0.526134	0.019574	buffering
ENSMUSG00000015468	Notch4	0.610835	0.327617	-0.119721	1	0.491114	0.566657	Unchanged		0.546847	0.211393	-0.332201	0.365717	0.793376	0.0799542	-0.581536	0.132921	background
ENSMUSG00000045374	Wdr81	0.6205	0.327617	0.518885	0.927394	1.13938	0.00543836	Ribo	Ribo exclusive	1.18481	0.0103983	0.269926	0.515546	1.19331	0.029293	0.300169	0.661304	translation
ENSMUSG00000021474	Sfxn1	0.653687	0.327854	0.639422	0.244289	1.29311	0.0133794	Ribo	Ribo exclusive	1.19861	0.00223839	0.598392	0.00382948	0.773702	0.188048	0.414796	0.16515	abundance
ENSMUSG00000036339	Tmem260	0.664431	0.327854	0.189059	1	0.85349	0.101422	Unchanged		0.714451	0.0364557	0.233555	0.220585	0.48292	0.196643	0.0485825	0.860639	background
ENSMUSG00000041815	Poldip3	0.392932	0.327854	0.241938	1	0.63487	0.0994363	Unchanged		0.587986	0.0205813	0.345306	0.169459	0.527638	0.0817429	0.213866	0.609305	background
ENSMUSG00000058440	Nrf1	-0.413581	0.327854	0.0676237	1	-0.345957	1	Unchanged		-0.297987	0.266599	-0.0801101	0.729169	-0.273112	0.375182	-0.0189536	0.951706	background
ENSMUSG00000001123	Lgals9	0.500801	0.328069	0.476802	1	0.977604	0.00423555	Ribo	Ribo exclusive	0.915965	0.00114597	0.252085	0.469492	0.833944	0.00544967	-0.607288	0.337864	translation
ENSMUSG00000026930	Gpsm1	-0.473362	0.328195	-0.30652	1	-0.779882	0.0566077	Unchanged		-0.902219	0.0103655	-0.413109	0.0668012	-1.13432	0.0154184	-0.622173	0.07163	translation
ENSMUSG00000041329	Atp1b2	0.590172	0.328195	-0.00732959	1	0.582842	0.687673	Unchanged		0.449472	0.191034	-0.0184233	0.953961	0.464449	0.166658	-0.216748	0.448403	background
ENSMUSG00000074886	Grk6	0.527788	0.328195	0.143579	1	0.671367	0.401053	Unchanged		0.556086	0.209298	-0.0661239	0.842249	0.635534	0.0810145	-0.336485	0.203587	background
ENSMUSG00000002428	Hltf	0.434263	0.328591	-0.085496	1	0.348767	1	Unchanged		0.233348	0.47803	-0.299555	0.343215	0.423083	0.196417	-0.43578	0.162235	background
ENSMUSG00000036712	Cyld	0.367221	0.328591	0.119034	1	0.486255	0.465035	Unchanged		0.503041	0.150872	0.0688341	0.608749	0.4569	0.273771	0.0481853	0.789532	background
ENSMUSG00000074909	Ranbp6	0.364333	0.328591	-0.316528	1	0.0478048	1	Unchanged		0.081255	0.717503	-0.264744	0.181938	0.18012	0.479377	-0.300654	0.179923	background
ENSMUSG00000000058	Cav2	0.474281	0.328873	0.0655169	1	0.539798	0.385433	Unchanged		0.542319	0.0504029	-0.207378	0.611368	0.487473	0.10681	0.132069	0.824678	background
ENSMUSG00000029561	Oasl2	0.625216	0.328873	0.756806	0.201674	1.38202	0.00101075	Ribo	Ribo exclusive	1.26603	0.00136889	0.630556	0.0248117	0.945285	0.0446001	0.22977	0.649049	translation
ENSMUSG00000034161	Scx	-1.00914	0.328873	1.68039	0.00277391	0.671255	1	RNA	RNA exclusive	0.760429	0.213149	1.43571	0.00569541	0.661771	0.5407	1.40973	0.0312052	buffering
ENSMUSG00000018199	Trove2	0.432288	0.329105	0.378064	1	0.810352	0.012359	Ribo	Ribo exclusive	0.74322	0.017922	0.429706	0.0514428	0.944728	0.0268631	0.599429	0.0694386	translation
ENSMUSG00000029772	Ahcyl2	0.355012	0.329105	-0.0262941	1	0.328718	1	Unchanged		0.218364	0.45868	-0.176591	0.414672	0.231792	0.519256	-0.184962	0.484614	background
ENSMUSG00000048154	Kmt2d	0.551361	0.329105	0.0268585	1	0.57822	0.583423	Unchanged		0.48154	0.141512	-0.0191223	0.940769	0.485778	0.199671	-0.0600735	0.852805	background
ENSMUSG00000067722	BC003965	-0.451638	0.329105	0.18561	1	-0.266028	1	Unchanged		-0.351494	0.22081	0.189873	0.231631	-0.400289	0.270001	0.2103	0.293134	background
ENSMUSG00000004936	Map2k1	-0.405516	0.329163	0.344234	1	-0.0612814	1	Unchanged		-0.124838	0.627472	0.00694749	0.991405	-0.125033	0.684564	0.025464	0.97136	background
ENSMUSG00000031711	Zfp330	-0.590989	0.329906	-0.0126686	1	-0.603658	0.402997	Unchanged		-0.621585	0.0371749	-0.0489929	0.781008	-0.670512	0.0377869	-0.194154	0.351834	translation
ENSMUSG00000030607	Acan	1.65366	0.330196	2.51556	0.00052396	4.16922	6.79047e-05	RNA+Ribo	concordant (fwd)	3.30792	9.86615e-05	2.0614	0.0154445	2.73134	0.00831182	0.630846	0.75264	translation
ENSMUSG00000041632	Mrps27	-0.342291	0.330309	-0.0736538	1	-0.415945	0.424685	Unchanged		-0.428014	0.0490695	-0.331556	0.385816	-0.371385	0.125488	0.0290798	0.963076	background
ENSMUSG00000001054	Rmnd5b	-0.452834	0.330662	0.420606	1	-0.0322274	1	Unchanged		-0.077793	0.76255	0.231941	0.38902	0.0191651	0.947985	0.183259	0.521562	background
ENSMUSG00000037533	Rapgef6	0.437235	0.330755	0.190515	1	0.62775	0.306503	Unchanged		0.458821	0.22641	0.131804	0.436032	0.605458	0.15894	0.196949	0.318611	background
ENSMUSG00000023885	Thbs2	0.581206	0.330976	0.493235	0.970863	1.07444	0.00650319	Ribo	Ribo exclusive	1.1231	0.00335293	0.334808	0.321211	0.888788	0.0137539	-0.421541	0.344332	translation
ENSMUSG00000038776	Ephx1	0.377547	0.330976	0.0849592	1	0.462507	0.376573	Unchanged		0.446238	0.0451424	-0.218711	0.635497	0.460724	0.0724818	-0.403934	0.568363	background
ENSMUSG00000032625	Thsd7a	0.570102	0.330983	0.335304	1	0.905406	0.0439484	Ribo	Ribo exclusive	0.796145	0.0227715	0.296269	0.246732	0.656265	0.102151	0.0966632	0.814423	background
ENSMUSG00000075054	Yae1d1	0.956179	0.331382	0.0987466	1	1.05493	0.209532	Unchanged		0.544014	0.382923	0.111938	0.564128	0.394506	0.593115	0.0675998	0.784066	background
ENSMUSG00000018076	Med13l	0.722975	0.331546	-0.133304	1	0.589671	0.633024	Unchanged		0.632903	0.215417	-0.282601	0.302506	0.812867	0.180245	-0.375607	0.256349	background
ENSMUSG00000024527	Afg3l2	0.214546	0.331546	-0.183257	1	0.0312898	1	Unchanged		0.0150591	0.942108	-0.295214	0.103512	-0.037941	0.881382	-0.29054	0.169272	background
ENSMUSG00000054733	Msra	-0.441721	0.331546	0.0165619	1	-0.425159	0.535902	Unchanged		-0.456785	0.107029	-0.214915	0.524828	-0.451703	0.177445	-0.199234	0.676341	background
ENSMUSG00000020522	Mfap3	0.479463	0.332228	0.21871	1	0.698173	0.154968	Unchanged		0.659571	0.0137884	0.242519	0.41198	0.635873	0.0412229	0.140976	0.793766	translation
ENSMUSG00000026867	Gapvd1	0.487444	0.332228	0.0104544	1	0.497898	0.432685	Unchanged		0.57978	0.129233	-0.0899751	0.641898	0.675363	0.10681	-0.193113	0.386215	background
ENSMUSG00000028282	Casp8ap2	0.5851	0.332228	0.0526579	1	0.637758	0.463867	Unchanged		0.29155	0.570531	0.103958	0.631064	0.421054	0.44628	0.149165	0.524838	background
ENSMUSG00000026628	Atf3	-1.11633	0.332777	-0.420258	1	-1.53658	0.0231506	Ribo	Ribo exclusive	-1.4173	0.0491375	-0.346996	0.611368	-1.15999	0.0819327	0.432457	0.556749	background
ENSMUSG00000028937	Acot7	-0.370861	0.332777	-0.258439	1	-0.6293	0.0837892	Unchanged		-0.674304	0.00942226	-0.302438	0.0611944	-0.601772	0.0714676	-0.238276	0.351834	background
ENSMUSG00000031748	Gnao1	0.437399	0.332777	0.72561	0.115477	1.16301	1.85195e-05	Ribo	Ribo exclusive	1.13431	0.000181924	0.557068	0.104483	0.918159	0.00263853	-0.856109	0.20063	translation
ENSMUSG00000041215	Yeats2	0.867867	0.332777	0.208517	1	1.07638	0.0484713	Ribo	Ribo exclusive	0.621347	0.45061	0.19824	0.357993	0.677674	0.514614	0.206767	0.427753	background
ENSMUSG00000045092	S1pr1	0.490613	0.332777	-0.244152	1	0.246461	1	Unchanged		0.200937	0.55003	-0.360332	0.24287	0.540593	0.0367296	-0.523888	0.0258173	translation
ENSMUSG00000054364	Rhob	-0.557411	0.332777	-0.184453	1	-0.741864	0.168964	Unchanged		-0.690994	0.0273876	-0.236496	0.454932	-0.556832	0.0767879	0.182033	0.656141	background
ENSMUSG00000058709	Egln2	-0.471222	0.332777	-0.0548883	1	-0.52611	0.695818	Unchanged		-0.647286	0.0782553	-0.355791	0.444864	-0.567402	0.180649	-0.135086	0.844403	background
ENSMUSG00000061665	Cd2ap	0.575769	0.332777	-0.253287	1	0.322483	1	Unchanged		-0.117173	0.884292	-0.39764	0.090799	-0.156691	0.888556	-0.398553	0.153972	background
ENSMUSG00000033857	Engase	0.922753	0.332829	0.130573	1	1.05333	0.158792	Unchanged		0.637057	0.332128	0.17754	0.434522	0.568413	0.485638	0.156468	0.583539	background
ENSMUSG00000032803	Cdv3	1.24434	0.333711	0.0830621	1	1.3274	0.0895245	Unchanged		0.678682	0.327295	-0.00182273	0.995538	0.675187	0.264755	0.157954	0.55808	background
ENSMUSG00000004631	Sgce	0.548091	0.33427	0.613763	0.517127	1.16185	0.00151865	Ribo	Ribo exclusive	1.07233	0.00567323	0.419981	0.120838	0.701761	0.0626093	-0.0943821	0.814275	background
ENSMUSG00000021033	Gstz1	-0.365123	0.33427	-0.110007	1	-0.47513	0.437148	Unchanged		-0.505697	0.0509801	-0.267591	0.254759	-0.493846	0.115665	-0.246896	0.475689	background
ENSMUSG00000022350	Washc5	0.330362	0.33427	0.124903	1	0.455265	0.517625	Unchanged		0.405238	0.207052	0.00447502	0.984605	0.405618	0.277403	0.014474	0.959015	background
ENSMUSG00000022400	Rbx1	0.604948	0.33427	0.0658162	1	0.670764	0.251454	Unchanged		0.542814	0.142082	0.0218407	0.903332	0.543063	0.209185	0.0225931	0.925411	background
ENSMUSG00000024188	Luc7l	0.684174	0.33427	-0.276129	1	0.408045	1	Unchanged		0.402892	0.21676	-0.26716	0.24336	0.431272	0.290651	-0.285898	0.330137	background
ENSMUSG00000027327	1700037H04Rik	-0.744385	0.33427	0.230463	1	-0.513922	0.837582	Unchanged		-0.569404	0.0626859	0.415379	0.340284	-0.599509	0.103801	0.50457	0.413599	background
ENSMUSG00000031782	Coq9	-0.320136	0.33427	-0.525787	0.437833	-0.845923	0.00141609	Ribo	Ribo exclusive	-0.908797	0.00170619	-0.599558	0.00277454	-0.51788	0.191424	-0.327467	0.267301	abundance
ENSMUSG00000032369	Plscr1	-0.534687	0.33427	0.163566	1	-0.371121	1	Unchanged		-0.462254	0.0973719	0.0615285	0.819672	-0.486801	0.116386	0.209173	0.522049	background
ENSMUSG00000090523	Gypc	-0.735852	0.33427	0.499448	1	-0.236403	1	Unchanged		-0.261052	0.465968	0.539762	0.0207461	-0.845448	0.056632	0.635485	0.0167921	buffering
ENSMUSG00000021294	Kif26a	0.738249	0.335383	0.685961	0.608019	1.42421	0.00304906	Ribo	Ribo exclusive	1.45615	0.00467644	0.511942	0.163825	1.41588	0.0268631	0.447005	0.481577	translation
ENSMUSG00000051335	Gfod1	-0.520977	0.335384	-0.234044	1	-0.755021	0.102026	Unchanged		-0.714917	0.0561335	-0.412247	0.143644	-0.816559	0.088486	-0.5051	0.195588	background
ENSMUSG00000028189	Ctbs	0.643055	0.335626	0.267318	1	0.910373	0.131514	Unchanged		0.796144	0.0143812	0.447102	0.263832	0.666212	0.0657267	0.0314679	0.963076	background
ENSMUSG00000027848	Olfml3	0.500696	0.335749	1.10511	0.00107267	1.60581	2.14143e-08	RNA+Ribo	concordant (fwd)	1.57475	7.2469e-05	0.811182	0.0779028	1.49344	0.00187202	0.316652	0.821306	translation
ENSMUSG00000014313	Cox6c	0.580098	0.336813	-0.533848	0.987498	0.0462503	1	Unchanged		0.0840984	0.861222	-0.779375	0.0567289	-0.191619	0.760114	-0.755272	0.103044	background
ENSMUSG00000003154	Foxj2	-0.432984	0.337692	-0.0499612	1	-0.482945	0.516663	Unchanged		-0.519258	0.0279092	0.0499163	0.873536	-0.54779	0.0160881	0.655886	0.0319249	translation
ENSMUSG00000021518	Ptdss1	-0.315304	0.337692	0.337699	1	0.0223951	1	Unchanged		-0.0970309	0.747747	0.286709	0.0169079	-0.0780297	0.904707	0.286375	0.045358	buffering
ENSMUSG00000023367	Tmem176a	-0.496114	0.337692	1.20514	2.99753e-05	0.709031	0.085825	RNA	RNA exclusive	0.703168	0.00791837	1.06685	0.00184019	0.424958	0.28073	0.753306	0.11951	abundance
ENSMUSG00000038957	Edc3	0.502072	0.337692	-0.0294828	1	0.472589	0.761218	Unchanged		0.404719	0.115286	-0.0361614	0.87463	0.426098	0.121086	-0.193823	0.446612	background
ENSMUSG00000042541	Sem1	-0.25841	0.337692	-0.172068	1	-0.430478	0.391756	Unchanged		-0.471763	0.0341462	-0.349597	0.187279	-0.467811	0.0814081	-0.338035	0.430044	background
ENSMUSG00000042178	Armc5	0.498089	0.337988	0.547925	0.488791	1.04601	0.00429161	Ribo	Ribo exclusive	0.98043	0.00227767	0.356041	0.236724	0.888935	0.0152351	0.0332577	0.95867	translation
ENSMUSG00000004096	Cwc15	-0.454083	0.338362	-0.0848968	1	-0.53898	0.286452	Unchanged		-0.711119	0.0836353	-0.198454	0.310259	-0.59469	0.232239	-0.129006	0.628533	background
ENSMUSG00000022556	Hsf1	-0.382249	0.338362	-0.212628	1	-0.594877	0.183827	Unchanged		-0.610931	0.0246095	-0.147191	0.481872	-0.510746	0.0724799	0.1025	0.727747	background
ENSMUSG00000026496	Parp1	-0.351305	0.338362	-0.26166	1	-0.612965	0.0941902	Unchanged		-0.631295	0.00758817	-0.489469	0.162638	-0.545632	0.0403888	-0.0408101	0.955082	translation
ENSMUSG00000059495	Arhgef12	0.394399	0.338362	-0.0264238	1	0.367975	1	Unchanged		0.343295	0.2878	-0.0869079	0.475343	0.566964	0.0991053	-0.131792	0.332993	background
ENSMUSG00000059588	Calcrl	0.591496	0.338362	0.319357	1	0.910853	0.0494684	Ribo	Ribo exclusive	0.74208	0.0740501	0.257874	0.229241	0.334904	0.388054	0.0110258	0.964832	background
ENSMUSG00000009079	Ewsr1	-0.396579	0.338618	0.0239045	1	-0.372675	0.960834	Unchanged		-0.431329	0.0990021	-0.303947	0.55887	-0.472615	0.114867	-0.569692	0.403602	background
ENSMUSG00000032218	Ccnb2	1.82099	0.338618	2.81783	0.000109286	4.63882	2.24511e-05	RNA+Ribo	concordant (fwd)	3.36453	0.00124441	2.76559	0.0016687	4.04012	0.022666	3.26824	0.0301522	translation
ENSMUSG00000021597	Slf1	0.476722	0.338652	-0.407143	1	0.0695795	1	Unchanged		-0.0627953	0.886168	-0.514082	0.0261457	-0.26976	0.668204	-0.520516	0.0561496	background
ENSMUSG00000024949	Sf1	-0.278679	0.338894	-0.434526	0.519645	-0.713205	0.00113253	Ribo	Ribo exclusive	-0.740834	0.00117994	-0.476867	0.00927632	-0.603925	0.0296418	-0.213475	0.583697	translation
ENSMUSG00000058396	Gpr182	0.631728	0.338894	0.166093	1	0.797821	0.197652	Unchanged		0.645208	0.0570499	0.222824	0.454355	0.57198	0.141693	0.0707492	0.87652	background
ENSMUSG00000022749	Tbc1d23	0.366357	0.339352	-0.0283017	1	0.338055	1	Unchanged		0.298011	0.274797	-0.0867824	0.63508	0.265061	0.405147	-0.0471091	0.847541	background
ENSMUSG00000031133	Arhgef6	0.38718	0.339352	-0.208475	1	0.178705	1	Unchanged		0.159052	0.676781	-0.331086	0.111228	0.0938266	0.863467	-0.322874	0.192169	background
ENSMUSG00000035629	Rubcn	0.375185	0.339352	0.611434	0.0956864	0.986618	0.000271772	Ribo	Ribo exclusive	0.969781	0.000789557	0.50512	0.0313409	0.965012	0.00997968	0.495009	0.321142	translation
ENSMUSG00000059183	Mtfmt	-0.516463	0.339352	0.0717911	1	-0.444672	1	Unchanged		-0.478873	0.0906231	0.0653174	0.746689	-0.47912	0.145548	0.0660317	0.818911	background
ENSMUSG00000053838	Nudcd3	-0.257669	0.339721	-0.0642992	1	-0.321968	1	Unchanged		-0.353007	0.0808977	-0.10958	0.371333	-0.27526	0.24416	-0.0454455	0.796154	background
ENSMUSG00000074305	Peak1	0.4491	0.339721	0.22709	1	0.67619	0.115413	Unchanged		0.541224	0.114189	0.0459609	0.900692	0.512792	0.132076	-0.2505	0.501845	background
ENSMUSG00000025264	Tsr2	-0.513093	0.340255	0.348538	1	-0.164555	1	Unchanged		-0.100436	0.744598	0.369503	0.101858	-0.329793	0.34141	0.406108	0.100073	background
ENSMUSG00000023830	Igf2r	0.293145	0.340719	0.286391	1	0.579537	0.0290308	Ribo	Ribo exclusive	0.531314	0.018631	0.192901	0.307326	0.409504	0.078651	-0.122531	0.646175	background
ENSMUSG00000032743	D430042O09Rik	0.448339	0.340719	0.269387	1	0.717726	0.248746	Unchanged		0.67565	0.0131452	0.225862	0.140025	0.752888	0.0315743	0.291339	0.206952	translation
ENSMUSG00000074405	Zfp865	-0.411006	0.340719	0.252577	1	-0.158429	1	Unchanged		-0.171001	0.456087	0.254551	0.162169	-0.107191	0.725745	0.223197	0.315571	background
ENSMUSG00000041775	Mapk1ip1	-0.651281	0.341009	-1.28185	0.000305793	-1.93313	9.82875e-08	RNA+Ribo	concordant (fwd)	-1.99595	0.000141589	-1.38931	0.000606427	-1.14132	0.115905	-0.671445	0.297113	abundance
ENSMUSG00000001751	Naglu	0.487358	0.343277	0.837842	0.0311607	1.3252	1.01813e-05	RNA+Ribo	concordant (fwd)	1.22078	0.000708828	0.893261	0.000835393	1.01545	0.0851092	0.758601	0.0801521	abundance
ENSMUSG00000025381	Cnpy2	-0.383695	0.343489	0.323409	1	-0.0602857	1	Unchanged		-0.0913124	0.774575	0.0975685	0.775331	-0.117092	0.750605	0.126447	0.752208	background
ENSMUSG00000052609	Plekhg3	0.433029	0.343489	0.186689	1	0.619718	0.221424	Unchanged		0.737075	0.0406864	-0.0828528	0.85195	0.756107	0.0648636	-0.299988	0.61584	background
ENSMUSG00000021192	Golga5	-0.383985	0.343807	0.025456	1	-0.358529	0.745974	Unchanged		-0.395473	0.241025	0.00247947	0.988148	-0.39716	0.304923	0.0246617	0.897933	background
ENSMUSG00000031103	Elf4	1.00001	0.343807	0.681741	0.631182	1.68175	0.00168424	Ribo	Ribo exclusive	1.03555	0.216144	0.57525	0.0163159	-0.672472	0.519923	0.41629	0.0713264	background
ENSMUSG00000031309	Rps6ka3	0.609051	0.343807	0.192572	1	0.801622	0.0918348	Unchanged		0.650691	0.16927	-0.125834	0.819466	0.711058	0.149639	-0.446071	0.442722	background
ENSMUSG00000044447	Dock5	0.63288	0.343807	-0.037766	1	0.595114	0.79911	Unchanged		0.754626	0.0619482	0.000736645	0.998706	0.754725	0.106864	0.0427057	0.923258	background
ENSMUSG00000055319	Sec23ip	0.301937	0.343807	-0.0966746	1	0.205263	1	Unchanged		0.17603	0.457977	-0.112755	0.464795	0.101178	0.726959	-0.070535	0.709626	background
ENSMUSG00000058070	Eml1	-0.235011	0.343807	-0.0824439	1	-0.317455	1	Unchanged		-0.328326	0.125395	-0.160617	0.309144	-0.269295	0.289734	-0.0935278	0.667797	background
ENSMUSG00000052911	Lamb2	0.344145	0.343879	-0.0218992	1	0.322245	1	Unchanged		0.269271	0.210241	-0.125037	0.568135	0.288221	0.246117	-0.17758	0.531964	background
ENSMUSG00000052557	Gan	0.650498	0.344509	0.136391	1	0.786888	0.361859	Unchanged		0.814646	0.099751	0.127307	0.531336	0.766667	0.193175	0.0925831	0.74461	background
ENSMUSG00000028062	Lamtor2	-0.417345	0.34457	-0.295123	1	-0.712468	0.0461027	Ribo	Ribo exclusive	-0.638471	0.0405204	-0.272712	0.0883261	-0.436063	0.279976	-0.180379	0.402126	background
ENSMUSG00000039887	Alg14	0.600352	0.345556	0.192003	1	0.792355	0.126579	Unchanged		0.67757	0.0615014	0.0963759	0.656274	0.58837	0.122977	-0.0707683	0.806863	background
ENSMUSG00000019794	Katna1	-0.415937	0.34564	-0.0314544	1	-0.447391	1	Unchanged		-0.461508	0.14078	-0.0318595	0.862437	-0.475111	0.186712	-0.0719294	0.75935	background
ENSMUSG00000026457	Adipor1	0.298199	0.345711	0.109761	1	0.40796	0.736593	Unchanged		0.417687	0.0681198	-0.0292932	0.903332	0.412113	0.11365	0.0575774	0.870843	background
ENSMUSG00000029203	Ube2k	-0.289208	0.345711	-0.536913	0.288326	-0.826121	0.000188323	Ribo	Ribo exclusive	-0.832391	0.000326376	-0.730694	0.0174932	-0.844682	0.00339545	-0.828698	0.395449	translation
ENSMUSG00000044876	Zfp444	-0.613991	0.345711	0.311151	1	-0.30284	1	Unchanged		-0.376419	0.303646	0.512111	0.20462	-0.435968	0.342829	0.564513	0.262392	background
ENSMUSG00000032763	Ilvbl	0.36685	0.346182	0.210479	1	0.577329	0.240142	Unchanged		0.561568	0.0367015	0.269191	0.157814	0.536088	0.111041	0.242506	0.388465	background
ENSMUSG00000005936	Kctd20	0.367951	0.346237	0.0432534	1	0.411204	0.782542	Unchanged		0.327423	0.215689	-0.180522	0.582673	0.380763	0.19557	-0.338798	0.381754	background
ENSMUSG00000005514	Por	-0.419188	0.346435	-0.129033	1	-0.548221	0.259915	Unchanged		-0.613213	0.0227965	-0.280784	0.370978	-0.466986	0.0735521	0.253671	0.502332	background
ENSMUSG00000027860	Vangl1	0.515854	0.347594	0.496282	0.764188	1.01214	0.0198299	Ribo	Ribo exclusive	0.880136	0.00555666	0.546085	0.0387212	0.749637	0.0643433	0.375297	0.394636	abundance
ENSMUSG00000028646	Rragc	0.392418	0.347641	0.038445	1	0.430863	0.644401	Unchanged		0.442298	0.0631331	0.125993	0.630785	0.471491	0.0832026	0.267476	0.453031	background
ENSMUSG00000049164	Zfp518a	0.592248	0.347641	0.0647139	1	0.656962	0.683081	Unchanged		0.488321	0.389109	0.0465839	0.826184	0.540643	0.394256	0.0917224	0.709528	background
ENSMUSG00000028821	Syf2	-0.350284	0.348455	-0.280823	1	-0.631107	0.0716909	Unchanged		-0.617824	0.0193006	-0.536619	0.178815	-0.540404	0.0806898	-0.254274	0.710501	background
ENSMUSG00000025372	Baiap2	-0.519176	0.348714	-0.805111	0.0741811	-1.32429	3.75467e-05	Ribo	Ribo exclusive	-1.3159	0.000358393	-0.833621	0.00544204	-0.667071	0.0579184	0.0776167	0.87114	abundance
ENSMUSG00000032184	Lysmd2	-0.549027	0.348714	0.230978	1	-0.318049	1	Unchanged		-0.327024	0.249573	0.204176	0.255512	-0.228715	0.519116	0.150912	0.50164	background
ENSMUSG00000074754	Smim26	-0.499252	0.348745	-0.546363	0.648703	-1.04561	0.00203301	Ribo	Ribo exclusive	-0.92183	0.0106229	-0.489983	0.0524553	-1.06849	0.0292775	-0.62794	0.11263	translation
ENSMUSG00000029017	Pmpcb	-0.307428	0.348892	-0.250157	1	-0.557585	0.0588795	Unchanged		-0.587205	0.0156887	-0.375403	0.0853711	-0.529552	0.0769281	-0.278256	0.436553	background
ENSMUSG00000034007	Scaper	0.372858	0.349184	-0.262223	1	0.110635	1	Unchanged		0.136189	0.581566	-0.600556	0.246063	0.243785	0.373552	-0.755084	0.18133	background
ENSMUSG00000024095	Hnrnpll	-0.262999	0.34942	-0.182489	1	-0.445488	0.399856	Unchanged		-0.503569	0.0464335	-0.267743	0.0811625	-0.486434	0.150832	-0.257874	0.227297	background
ENSMUSG00000025525	Apool	-0.586497	0.349551	-0.19421	1	-0.780707	0.136258	Unchanged		-0.867562	0.0679059	-0.442002	0.247005	-0.567361	0.26911	-0.099234	0.847942	background
ENSMUSG00000043683	Fem1a	-0.430664	0.349551	0.134789	1	-0.295875	1	Unchanged		-0.38562	0.22367	0.0697634	0.650939	-0.333266	0.365864	0.0312143	0.879839	background
ENSMUSG00000032328	Tmem30a	0.314658	0.349576	0.000704359	1	0.315362	1	Unchanged		0.318324	0.221245	-0.0292259	0.856915	0.279176	0.273771	0.0711818	0.675688	background
ENSMUSG00000008763	Man1a2	0.530568	0.349972	0.17037	1	0.700938	0.365813	Unchanged		0.288672	0.653911	0.163837	0.242976	0.210323	0.8207	0.160457	0.340339	background
ENSMUSG00000032220	Myo1e	0.506251	0.349972	0.464207	1	0.970458	0.0150572	Ribo	Ribo exclusive	0.868369	0.00475617	0.402659	0.0922372	0.664931	0.0554329	0.0715039	0.870752	background
ENSMUSG00000042197	Zfp451	0.498395	0.349972	-0.211583	1	0.286813	1	Unchanged		0.1802	0.696112	-0.443641	0.228702	0.105083	0.864524	-0.424276	0.332993	background
ENSMUSG00000042350	Arel1	0.453892	0.349972	-0.00850626	1	0.445386	0.768561	Unchanged		0.48317	0.151721	-0.19631	0.523194	0.483409	0.229909	-0.196746	0.634501	background
ENSMUSG00000001983	Taco1	-0.321274	0.350783	-0.573673	0.201666	-0.894947	0.00035857	Ribo	Ribo exclusive	-0.896507	0.00117394	-0.589886	0.00312162	-0.368694	0.230252	-0.120015	0.669361	abundance
ENSMUSG00000020459	Mtif2	0.428069	0.351244	-0.527544	0.609979	-0.0994749	1	Unchanged		-0.163773	0.634584	-0.835393	0.082728	-0.179937	0.706928	-0.842207	0.145372	background
ENSMUSG00000020883	Fbxl20	0.501116	0.351244	-0.0496734	1	0.451443	1	Unchanged		0.44888	0.19399	-0.260401	0.430468	0.416091	0.317994	-0.212998	0.627282	background
ENSMUSG00000022197	Pdzd2	0.576257	0.351244	-0.10031	1	0.475947	0.701514	Unchanged		0.685601	0.118214	-0.183815	0.348198	0.839524	0.10839	-0.26476	0.276822	background
ENSMUSG00000022386	Trmu	0.457064	0.351244	-0.255013	1	0.202051	1	Unchanged		0.129205	0.686335	-0.332757	0.0317339	-0.00747444	0.990396	-0.324291	0.0767648	background
ENSMUSG00000013921	Clip3	0.724981	0.351337	0.786968	0.334682	1.51195	0.00204196	Ribo	Ribo exclusive	1.40409	0.000141571	1.06138	0.0385145	1.37458	0.00325402	0.902948	0.494043	translation
ENSMUSG00000029651	Mtus2	-0.369027	0.35147	0.636011	0.244522	0.266983	1	Unchanged		0.210148	0.479816	0.500907	0.0428047	0.213964	0.620095	0.501986	0.0948277	background
ENSMUSG00000066235	Pomgnt2	-0.491028	0.35147	0.0287118	1	-0.462317	0.771153	Unchanged		-0.516339	0.0751339	0.16699	0.625549	-0.574903	0.0745369	0.415115	0.328026	background
ENSMUSG00000031502	Col4a1	0.693122	0.3515	1.06178	0.0522939	1.7549	5.8103e-06	Ribo	Ribo exclusive	1.6713	0.000244833	0.787645	0.126279	1.25561	0.00192509	-1.20014	0.107964	translation
ENSMUSG00000020283	Pex13	0.420218	0.353147	-0.215217	1	0.205001	1	Unchanged		0.169189	0.592119	-0.449743	0.228699	0.171801	0.67524	-0.451264	0.319536	background
ENSMUSG00000037652	Phc3	0.49879	0.353147	-0.121292	1	0.377498	1	Unchanged		0.288951	0.284657	0.0030003	0.993792	0.289395	0.350783	0.0807195	0.869323	background
ENSMUSG00000056305	Usp39	-0.341627	0.353147	0.191075	1	-0.150552	1	Unchanged		-0.173462	0.423424	-0.0481552	0.897188	-0.17165	0.499041	-0.0236916	0.960338	background
ENSMUSG00000057229	Dmac2	-0.351358	0.353147	-0.504852	0.546597	-0.856209	0.00160904	Ribo	Ribo exclusive	-0.820892	0.00380235	-0.511256	0.0060225	-0.231364	0.483067	-0.145403	0.512806	abundance
ENSMUSG00000001700	Gramd3	-0.400053	0.353258	-0.40952	0.949576	-0.809574	0.0368465	Ribo	Ribo exclusive	-0.678017	0.0421732	-0.379442	0.0368038	-0.65184	0.17738	-0.369033	0.139172	abundance
ENSMUSG00000029167	Ppargc1a	0.561337	0.353258	-2.7944	3.24645e-24	-2.23306	5.89627e-15	RNA+Ribo	concordant (fwd)	-2.20584	1.56045e-05	-2.85301	3.88221e-06	-0.553969	0.575117	-1.61845	0.0522447	abundance
ENSMUSG00000020455	Trim11	0.457841	0.353474	0.564956	0.539642	1.0228	0.00191009	Ribo	Ribo exclusive	1.01021	0.00418721	0.347039	0.297331	1.09338	0.0110318	0.615521	0.279682	translation
ENSMUSG00000040356	Skiv2l	0.493963	0.353506	0.241812	1	0.735775	0.104551	Unchanged		0.758858	0.0321817	0.0858848	0.768649	0.722672	0.0671305	-0.0964528	0.821306	background
ENSMUSG00000040843	Tiprl	-0.486233	0.353506	-0.0688558	1	-0.555089	0.397784	Unchanged		-0.663642	0.100738	-0.108743	0.397188	-0.755731	0.13645	-0.131486	0.413599	background
ENSMUSG00000042487	Leo1	-0.467622	0.353506	0.222572	1	-0.24505	1	Unchanged		-0.28175	0.291702	0.00845298	0.9833	-0.286052	0.258806	0.265563	0.410066	background
ENSMUSG00000000563	Atp5f1	-0.445808	0.353647	-0.520671	0.62346	-0.966479	0.00204494	Ribo	Ribo exclusive	-0.894681	0.00942226	-0.674029	0.0212095	-0.890626	0.0655955	-0.670044	0.144537	abundance
ENSMUSG00000002778	Kdelr1	0.348692	0.353647	0.155347	1	0.504039	0.313364	Unchanged		0.475633	0.0522173	0.185628	0.363846	0.373734	0.161766	-0.0113531	0.970876	background
ENSMUSG00000004264	Phb2	-0.30101	0.353647	-0.159566	1	-0.460576	0.287902	Unchanged		-0.483237	0.0304619	-0.367348	0.254263	-0.578352	0.0268631	-0.784221	0.097886	translation
ENSMUSG00000008200	Fnbp4	0.3976	0.353647	-0.430921	0.828115	-0.0333213	1	Unchanged		-0.0281317	0.921493	-0.47882	0.0100911	0.0874182	0.849646	-0.47611	0.0321922	buffering
ENSMUSG00000018412	Kansl1	0.318102	0.353647	-0.296645	1	0.021456	1	Unchanged		-0.045615	0.86035	-0.342772	0.0220104	0.0892442	0.819827	-0.337241	0.0561496	background
ENSMUSG00000020547	Bzw2	-0.367845	0.353647	-0.36768	1	-0.735525	0.0189108	Ribo	Ribo exclusive	-0.769227	0.0103144	-0.450431	0.0100911	-0.682202	0.139003	-0.412043	0.102302	abundance
ENSMUSG00000022799	Arhgap31	0.424133	0.353647	-0.0618561	1	0.362277	1	Unchanged		0.364893	0.272435	-0.181473	0.369378	0.444223	0.260792	-0.229123	0.351675	background
ENSMUSG00000024787	Snx15	-0.481506	0.353647	0.0239331	1	-0.457573	0.767361	Unchanged		-0.526482	0.104454	-0.0633574	0.732604	-0.5013	0.181121	-0.018124	0.94577	background
ENSMUSG00000056770	Setd3	-0.343929	0.353647	0.0932845	1	-0.250645	1	Unchanged		-0.194654	0.415734	0.154333	0.436668	-0.253112	0.354994	0.208819	0.368861	background
ENSMUSG00000064080	Fbln2	0.539963	0.353647	1.22119	0.00225185	1.76116	5.19816e-08	RNA+Ribo	concordant (fwd)	1.65508	0.000157666	0.971402	0.0459294	1.34888	0.00561237	-0.213593	0.85618	translation
ENSMUSG00000034189	Hsdl1	-0.468905	0.354685	0.378732	1	-0.0901728	1	Unchanged		-0.139972	0.670097	0.453449	0.0524553	-0.250436	0.580507	0.470163	0.0909571	background
ENSMUSG00000002319	Ipo4	0.576631	0.355672	0.582412	0.672911	1.15904	0.0017412	Ribo	Ribo exclusive	1.15687	0.0037937	0.218148	0.761268	1.11726	0.0120904	-0.542839	0.648956	translation
ENSMUSG00000003228	Grk5	0.544346	0.355672	0.587065	0.513772	1.13141	0.00572138	Ribo	Ribo exclusive	0.9215	0.0339416	0.421609	0.108761	0.370013	0.356527	0.0289779	0.925914	background
ENSMUSG00000017288	Vps53	0.292276	0.355672	0.181993	1	0.474269	0.208218	Unchanged		0.496861	0.0258452	0.0655814	0.767032	0.483592	0.0560076	-0.0549227	0.883038	background
ENSMUSG00000034744	Nagk	-0.32578	0.355672	0.516485	0.276587	0.190705	1	Unchanged		0.1987	0.341646	0.435078	0.00997575	0.333511	0.277006	0.473914	0.0279885	buffering
ENSMUSG00000039183	Nubp2	-0.458363	0.355672	0.559108	0.473534	0.100744	1	Unchanged		0.0318298	0.914281	0.613711	0.0183476	-0.0668233	0.877927	0.609013	0.046653	buffering
ENSMUSG00000039298	Cdk5rap2	0.52755	0.355672	0.450605	0.987498	0.978154	0.0487863	Ribo	Ribo exclusive	1.02648	0.0176711	0.378362	0.0417664	0.574376	0.300398	0.208948	0.396929	abundance
ENSMUSG00000043631	Ecm2	0.886982	0.355672	0.747721	1	1.6347	0.00332418	Ribo	Ribo exclusive	1.17123	0.0789248	0.343957	0.572359	0.821695	0.0741641	-0.470467	0.290957	background
ENSMUSG00000052833	Sae1	-0.258226	0.355672	0.336359	1	0.0781336	1	Unchanged		0.027923	0.900064	0.258418	0.0696205	-0.162657	0.512717	0.247376	0.114799	background
ENSMUSG00000009470	Tnpo1	0.292515	0.355957	0.255664	1	0.548179	0.0927015	Unchanged		0.495229	0.0611043	0.163894	0.297331	0.376936	0.217731	0.0639045	0.778685	background
ENSMUSG00000019647	Sema6a	0.697784	0.356843	0.415071	1	1.11286	0.0388602	Ribo	Ribo exclusive	1.02446	0.0080762	0.240397	0.629038	0.971426	0.0252878	-0.161979	0.851054	translation
ENSMUSG00000029752	Asns	1.06924	0.356846	0.934418	0.129382	2.00365	0.000504678	Ribo	Ribo exclusive	1.70583	0.0015782	0.935648	0.00881404	0.941845	0.135362	0.30899	0.559326	abundance
ENSMUSG00000031668	Eif2ak3	0.443344	0.356846	0.337026	1	0.78037	0.129323	Unchanged		0.561723	0.197125	0.298227	0.0366567	-0.0850288	0.904775	0.23669	0.144285	background
ENSMUSG00000038122	Tbc1d32	0.534209	0.356993	0.00979052	1	0.544	0.890104	Unchanged		0.498884	0.201123	0.0375765	0.896195	0.528644	0.19457	0.182668	0.544111	background
ENSMUSG00000029014	Dnajc2	-0.388367	0.357194	0.126915	1	-0.261452	1	Unchanged		-0.178126	0.633561	0.146031	0.395456	-0.197848	0.675348	0.149771	0.465901	background
ENSMUSG00000028803	Nipal3	-0.455641	0.358145	-0.0202407	1	-0.475882	0.990879	Unchanged		-0.542012	0.0326229	-0.214165	0.487605	-0.630861	0.0246319	-0.62033	0.117168	translation
ENSMUSG00000033909	Usp36	0.428787	0.358145	-0.244466	1	0.184321	1	Unchanged		0.31036	0.223556	-0.184474	0.395813	0.346712	0.252175	-0.229544	0.406623	background
ENSMUSG00000045896	Paip2b	-0.472291	0.358145	-0.021409	1	-0.4937	0.552732	Unchanged		-0.51728	0.110061	0.10387	0.746811	-0.564407	0.111001	0.301265	0.422573	background
ENSMUSG00000067847	Romo1	-0.575465	0.358145	-0.168592	1	-0.744057	0.149105	Unchanged		-0.875578	0.0205813	-0.102332	0.737909	-0.806056	0.0394327	0.237266	0.539904	translation
ENSMUSG00000062014	Gmfb	0.417058	0.358294	0.321801	1	0.738859	0.0541392	Unchanged		0.618613	0.0422814	0.397552	0.0842251	0.833603	0.0335485	0.582994	0.0670644	translation
ENSMUSG00000009035	Tmem184b	0.42074	0.358647	0.382135	1	0.802875	0.0280756	Ribo	Ribo exclusive	0.741223	0.0123252	0.130559	0.735156	0.691424	0.0260045	-0.410446	0.427806	translation
ENSMUSG00000026566	Mpzl1	0.819186	0.358647	0.519992	1	1.33918	0.0268856	Ribo	Ribo exclusive	1.23999	0.000807817	0.691073	0.236381	1.35586	0.00270099	1.55134	0.184784	translation
ENSMUSG00000037174	Elf2	-0.298145	0.358647	-0.261561	1	-0.559705	0.088929	Unchanged		-0.545842	0.0341462	-0.245607	0.0975323	-0.267975	0.367038	-0.081339	0.676223	background
ENSMUSG00000039942	Ptger4	0.709441	0.358647	0.805731	0.109185	1.51517	0.00488511	Ribo	Ribo exclusive	1.29907	0.00161141	0.763856	0.00732346	0.58748	0.186821	0.163755	0.679227	abundance
ENSMUSG00000042211	Fbxo38	0.306858	0.358647	-0.006815	1	0.300043	0.932863	Unchanged		0.294631	0.114695	0.0513529	0.818409	0.284048	0.175536	-0.0872768	0.78999	background
ENSMUSG00000045252	Zfp574	-0.342516	0.358647	-0.15938	1	-0.501896	0.346151	Unchanged		-0.529325	0.0105598	-0.288792	0.203178	-0.581131	0.0189098	-0.53056	0.207221	translation
ENSMUSG00000022892	App	0.33477	0.360085	0.587715	0.330978	0.922485	0.0012716	Ribo	Ribo exclusive	0.953406	0.00168349	0.351075	0.383926	0.884206	0.00927165	-0.202781	0.815828	translation
ENSMUSG00000026578	Ccdc181	-0.558312	0.360095	-0.120723	1	-0.679035	0.479169	Unchanged		-0.748386	0.0393396	-0.138466	0.613614	-0.682458	0.0918	0.036836	0.930234	background
ENSMUSG00000001440	Kpnb1	-0.355101	0.360904	0.31432	1	-0.0407812	1	Unchanged		-0.109542	0.725942	0.235494	0.158258	-0.350643	0.305993	0.263397	0.148217	background
ENSMUSG00000001767	Crnkl1	-0.332183	0.361027	-0.263695	1	-0.595878	0.0644466	Unchanged		-0.678318	0.0125828	-0.511613	0.179951	-0.502465	0.0746475	0.134992	0.823382	background
ENSMUSG00000028690	Mmachc	-0.36266	0.361237	-0.415995	1	-0.778656	0.00418215	Ribo	Ribo exclusive	-0.814421	0.00240467	-0.662404	0.0773074	-0.802995	0.014981	-0.612279	0.430044	translation
ENSMUSG00000019822	Smpd2	0.394056	0.361261	-0.561708	0.457592	-0.167651	1	Unchanged		-0.247648	0.380851	-0.524956	0.00802404	0.502928	0.0811028	-0.400097	0.0225686	buffering
ENSMUSG00000027637	Rab5if	0.596474	0.361261	0.0230586	1	0.619533	0.402901	Unchanged		0.422224	0.282876	-0.150525	0.60695	0.242503	0.44147	0.077858	0.759306	background
ENSMUSG00000022718	Dgcr8	0.3553	0.361926	0.13047	1	0.48577	0.540017	Unchanged		0.500702	0.114509	0.135108	0.359506	0.473061	0.230082	0.121883	0.526542	background
[truncated: 5,977 more rows]

## Sheet: TAC2d_vs_swim2d
row.names	symbol	log2FC.inter	padj.inter	log2FC.rna	padj.rna	log2FC.ribo	padj.ribo	hue	class	translatedmRNA.apvEff	translatedmRNA.apvRvmPAdj	totalmRNA.apvEff	totalmRNA.apvRvmPAdj	translation.apvEff	translation.apvRvmPAdj	buffering.apvEff	buffering.apvRvmPAdj	singleRegMode
ENSMUSG00000015656	Hspa8	-3.38928	4.70711e-10	-0.0873012	1	-3.47658	6.2485e-19	TE	TE	-3.81274	0.00447121	-0.0426128	0.929876	-3.91653	0.0183401	-0.264771	0.768809	translation
ENSMUSG00000021520	Uqcrb	-3.37997	4.70711e-10	-0.0157091	1	-3.39568	6.0885e-19	TE	TE	-3.50705	0.00355985	0.287488	0.781224	-3.6065	0.0170331	1.94762	0.682733	translation
ENSMUSG00000043716	Rpl7	-3.83106	1.53635e-09	0.369878	1	-3.46118	1.96893e-10	TE	TE	-4.01368	0.0130064	0.149856	0.862426	-4.22564	0.0282883	0.817647	0.656681	translation
ENSMUSG00000006717	Acot13	-2.07088	1.69706e-09	-0.698114	0.610907	-2.769	3.54634e-32	TE	TE	-2.82215	0.00355985	-0.69636	0.169013	-2.00292	0.158753	-0.393671	0.723377	background
ENSMUSG00000066036	Ubr4	1.83445	1.69706e-09	0.3079	1	2.14235	1.50955e-20	TE	TE	2.12886	0.00355985	0.347717	0.469484	2.08774	0.0170331	-0.0102984	0.998444	translation
ENSMUSG00000018770	Atp5g3	-1.49501	1.27278e-08	-0.756198	0.0938841	-2.25121	1.70681e-35	TE	TE	-2.27232	0.00355985	-0.696095	0.169013	-1.96468	0.0288456	-0.134671	0.95268	translation
ENSMUSG00000018707	Dync1h1	2.14994	2.07356e-08	0.42447	1	2.57441	2.1045e-21	TE	TE	2.53694	0.00355985	0.445928	0.404617	2.61597	0.0170331	0.690936	0.769421	translation
ENSMUSG00000000631	Myo18a	1.78649	9.04495e-07	0.0629737	1	1.84946	8.4617e-12	TE	TE	1.84983	0.00393357	0.0411169	0.943772	1.8207	0.0170331	-1.39496	0.442432	translation
ENSMUSG00000022565	Plec	2.19105	2.7641e-06	0.0719431	1	2.26299	6.47472e-12	TE	TE	2.17987	0.00436362	0.0501343	0.93737	2.13402	0.0170331	-1.01827	0.538858	translation
ENSMUSG00000037075	Rnf139	-2.26957	5.97024e-06	-0.00405938	1	-2.27363	5.09757e-08	TE	TE	-2.41188	0.0043866	-0.0664583	0.900939	-2.52154	0.0170331	-0.712197	0.525911	translation
ENSMUSG00000001891	Ugp2	-1.66718	7.30084e-06	-0.459309	1	-2.12649	1.78014e-16	TE	TE	-2.17781	0.00355985	-0.386442	0.437992	-2.01934	0.0209058	0.00672794	0.998385	translation
ENSMUSG00000004945	Tmem242	2.46393	1.26789e-05	-0.503143	1	1.96078	1.50421e-06	TE	TE	1.87933	0.00557057	-0.791215	0.410504	1.74085	0.033237	-0.137653	0.968811	translation
ENSMUSG00000038146	Notch3	1.80907	1.26789e-05	0.388306	1	2.19738	4.95653e-12	TE	TE	2.15616	0.00355985	0.395635	0.408574	1.75509	0.0183804	-0.600877	0.676201	translation
ENSMUSG00000045128	Rpl18a	-4.11322	1.62431e-05	0.259698	1	-3.85353	1.4193e-05	TE	TE	-3.74864	0.00380714	0.588043	0.600127	-4.2417	0.0170331	3.6125	0.351712	translation
ENSMUSG00000019787	Trdn	-1.69743	1.83905e-05	-0.308866	1	-2.00629	6.21153e-13	TE	TE	-2.05109	0.00417192	-0.242595	0.598732	-1.66007	0.0243821	0.277215	0.771442	translation
ENSMUSG00000042744	Hectd4	2.00742	1.83905e-05	-0.0417179	1	1.9657	3.3072e-07	TE	TE	2.00203	0.00417192	0.00150722	0.998503	2.0015	0.0170331	-0.408718	0.832918	translation
ENSMUSG00000021279	Cdc42bpb	1.7256	2.91359e-05	-0.0282434	1	1.69735	3.75715e-07	TE	TE	1.66071	0.0044654	-0.1155	0.830781	1.66924	0.0183804	-0.211484	0.918202	translation
ENSMUSG00000022048	Dpysl2	1.45484	2.91359e-05	0.0898863	1	1.54472	9.03815e-09	TE	TE	1.51114	0.00436362	0.188337	0.690044	1.52983	0.0182071	0.34295	0.862449	translation
ENSMUSG00000030647	Ndufc2	-1.69346	2.91359e-05	-0.42391	1	-2.11737	1.25892e-14	TE	TE	-2.16934	0.00355985	-0.241119	0.715701	-2.04417	0.0170331	1.54638	0.563869	translation
ENSMUSG00000026131	Dst	1.67446	5.46094e-05	-0.210821	1	1.46363	8.02869e-06	TE	TE	1.39674	0.00856376	-0.184885	0.705698	1.24172	0.03586	0.217791	0.839161	translation
ENSMUSG00000052738	Suclg1	-1.26187	5.46094e-05	-0.63302	0.612317	-1.89489	1.92181e-19	TE	TE	-1.92141	0.00355985	-0.589785	0.213564	-1.40036	0.0380826	0.26698	0.85215	translation
ENSMUSG00000022337	Emc2	-2.35547	6.02785e-05	-0.232149	1	-2.58762	9.05972e-11	TE	TE	-2.8253	0.007118	-0.148622	0.746055	-2.97327	0.0308017	-0.237297	0.780915	translation
ENSMUSG00000026032	Ndufb3	-1.67081	7.29446e-05	-0.563952	1	-2.23476	1.51773e-15	TE	TE	-2.29099	0.00355985	-0.667365	0.241668	-2.0674	0.0243821	-0.0766083	0.978354	translation
ENSMUSG00000030319	Cand2	1.51053	8.78346e-05	-0.116279	1	1.39425	2.19369e-06	TE	TE	1.36531	0.00820122	-0.118878	0.786133	1.51273	0.0243821	-0.317535	0.683263	translation
ENSMUSG00000001833	Sept7	-1.63585	9.04978e-05	0.206676	1	-1.42918	1.40935e-05	TE	TE	-1.4799	0.00787218	0.216058	0.623706	-2.04047	0.0170331	0.604765	0.40107	translation
ENSMUSG00000072720	Myo18b	1.35058	9.41586e-05	-0.15585	1	1.19473	2.90771e-05	TE	TE	1.18265	0.00821399	-0.133225	0.774973	1.31331	0.0200248	-0.782931	0.437454	translation
ENSMUSG00000004562	Arhgef40	2.3305	9.69824e-05	0.530802	1	2.8613	1.67924e-10	TE	TE	2.73899	0.00355985	0.639021	0.347885	3.19391	0.0170331	1.94743	0.442039	translation
ENSMUSG00000004677	Myo9b	2.09691	9.69824e-05	0.505225	1	2.60213	1.59056e-09	TE	TE	2.57387	0.00397673	0.441633	0.410807	2.52673	0.0275228	0.379348	0.816902	translation
ENSMUSG00000024451	Arap3	2.13892	0.000103325	-0.42129	1	1.71763	0.000388734	TE	TE	1.65484	0.00393357	-0.623104	0.429185	1.68759	0.0170331	-1.50507	0.811782	translation
ENSMUSG00000026207	Speg	1.34297	0.00011883	-0.283	1	1.05997	0.000533702	TE	TE	1.05434	0.0142551	-0.24223	0.570724	1.43377	0.0401666	-0.409166	0.544244	translation
ENSMUSG00000022558	Mroh1	2.0383	0.000124502	0.289118	1	2.32742	1.72043e-08	TE	TE	2.42741	0.0044654	0.22304	0.678933	2.32997	0.0243199	0.00321597	0.999119	translation
ENSMUSG00000030451	Herc2	1.83848	0.00012762	0.0747651	1	1.91324	5.90158e-07	TE	TE	1.90712	0.00397673	0.0135334	0.985402	1.901	0.0170331	-0.970312	0.676606	translation
ENSMUSG00000038583	Pln	-1.48435	0.000131101	0.074287	1	-1.41007	2.54177e-06	TE	TE	-1.46021	0.00713397	0.108898	0.82879	-1.41139	0.0254215	-0.14551	0.915843	translation
ENSMUSG00000041638	Gcn1l1	1.57717	0.000131101	0.438814	1	2.01598	8.57943e-12	TE	TE	2.01194	0.00370143	0.338973	0.570657	1.88926	0.0170331	-0.678463	0.799817	translation
ENSMUSG00000021819	Zswim8	1.7984	0.000164933	0.14	1	1.9384	2.49015e-07	TE	TE	1.89591	0.00433956	0.00732401	0.9935	1.89306	0.0170331	-0.789435	0.733507	translation
ENSMUSG00000059447	Hadhb	-1.74489	0.000171981	-0.262208	1	-2.0071	7.63902e-10	TE	TE	-2.02247	0.00355985	-0.314235	0.623771	-1.9587	0.0170331	0.837629	0.83455	translation
ENSMUSG00000002602	Axl	1.66344	0.000186142	0.420783	1	2.08422	1.39821e-10	TE	TE	2.0501	0.00355985	0.358159	0.549937	2.00639	0.0170331	-0.227735	0.956608	translation
ENSMUSG00000022205	Sub1	-2.28089	0.000215386	0.097646	1	-2.18324	8.06907e-07	TE	TE	-2.32975	0.00882581	0.182743	0.698322	-2.67987	0.0247196	0.441315	0.616356	translation
ENSMUSG00000031201	Brcc3	-1.99633	0.000217882	-0.153949	1	-2.15028	3.48293e-07	TE	TE	-2.30269	0.00711552	0.0411612	0.952529	-2.30721	0.0246907	0.109701	0.953633	translation
ENSMUSG00000028295	Smim8	-2.15201	0.000218128	-0.573459	1	-2.72546	3.16885e-10	TE	TE	-2.82623	0.00399482	-0.217233	0.815792	-2.72324	0.0170331	1.18392	0.714104	translation
ENSMUSG00000045482	Trrap	1.78065	0.000295208	0.201925	1	1.98257	4.66072e-07	TE	TE	1.99458	0.00504307	0.217778	0.64823	2.05526	0.0243856	0.306643	0.786554	translation
ENSMUSG00000062981	Mrpl42	-1.80854	0.000295208	-0.765908	0.963016	-2.57444	1.27369e-13	TE	TE	-2.71337	0.00394864	-0.70006	0.226608	-1.95079	0.0643506	0.0190675	0.992186	background
ENSMUSG00000021024	Psma6	-1.61763	0.000312068	-0.0469213	1	-1.66455	5.52951e-07	TE	TE	-1.72165	0.00571059	0.120806	0.845479	-1.66884	0.0221453	-0.439791	0.810164	translation
ENSMUSG00000023008	Fmnl3	1.79978	0.000316839	0.0724821	1	1.87226	7.31995e-06	TE	TE	1.84359	0.00380714	0.166141	0.730415	1.88494	0.0170331	0.510584	0.793728	translation
ENSMUSG00000026478	Lamc1	1.35058	0.000356563	0.152261	1	1.50284	8.77757e-08	TE	TE	1.48207	0.00436362	0.0634697	0.924868	1.46813	0.0170331	-2.04437	0.611375	translation
ENSMUSG00000037361	Sf3b6	-2.25996	0.000358863	0.302908	1	-1.95705	8.4794e-05	TE	TE	-1.9806	0.00518714	0.509829	0.545225	-2.12408	0.0209058	1.30758	0.665529	translation
ENSMUSG00000042198	Chchd7	-1.72013	0.000397274	-0.608712	1	-2.32884	1.28563e-10	TE	TE	-2.33714	0.00355985	-0.5427	0.251878	-1.99119	0.0227683	0.190481	0.924263	translation
ENSMUSG00000056724	Nbeal2	2.82351	0.000469273	0.0687649	1	2.89227	3.15555e-05	TE	TE	2.80374	0.00627035	-0.332467	0.788364	2.94385	0.0202903	-1.65439	0.650779	translation
ENSMUSG00000008348	Ubc	-1.36868	0.000505585	0.0383364	1	-1.33034	8.02869e-06	TE	TE	-1.36941	0.00695504	0.138503	0.801465	-1.37042	0.0243821	0.148209	0.940299	translation
ENSMUSG00000025609	Mkln1	-1.43051	0.000505585	-0.209844	1	-1.64036	1.25833e-07	TE	TE	-1.672	0.0049947	-0.118141	0.806557	-1.62576	0.0217442	0.0827066	0.953633	translation
ENSMUSG00000020397	Med7	-2.66204	0.00051446	0.0530023	1	-2.60904	2.38919e-05	TE	TE	-2.55817	0.00355985	0.0495053	0.91803	-2.52755	0.0170331	-0.347882	0.829724	translation
ENSMUSG00000069662	Marcks	2.21907	0.000526845	-0.0496724	1	2.1694	4.96774e-07	TE	TE	2.17039	0.00355985	-0.0396177	0.963591	2.16598	0.0170331	0.623237	0.896801	translation
ENSMUSG00000032803	Cdv3	2.83413	0.000554798	-0.28423	1	2.5499	2.05768e-06	TE	TE	2.27729	0.0143624	-0.0891038	0.901765	2.22006	0.0412851	0.211821	0.896027	translation
ENSMUSG00000040843	Tiprl	-1.67528	0.000554798	-0.0654558	1	-1.74073	5.54712e-06	TE	TE	-1.7448	0.00397673	0.0492077	0.924649	-1.76928	0.0170331	0.839103	0.666	translation
ENSMUSG00000022111	Uchl3	-2.18573	0.000584455	0.521894	1	-1.66384	0.00128608	TE	TE	-1.65089	0.00455798	0.406693	0.483915	-1.70219	0.0226405	0.631653	0.774528	translation
ENSMUSG00000026393	Nek7	-1.60449	0.000584455	0.108798	1	-1.49569	0.000121775	TE	TE	-1.5457	0.00557057	0.070291	0.890695	-1.55663	0.0210716	0.159849	0.911728	translation
ENSMUSG00000030629	Zfand6	-1.45775	0.000584455	-0.499031	1	-1.95678	9.05972e-11	TE	TE	-1.99341	0.00355985	-0.467827	0.28642	-2.07296	0.0648285	-0.503676	0.61327	background
ENSMUSG00000025261	Huwe1	1.28184	0.000671678	-0.0432897	1	1.23855	6.1346e-05	TE	TE	1.19629	0.0088657	-0.0327873	0.949473	1.1852	0.0269278	0.159129	0.899606	translation
ENSMUSG00000040940	Arhgef1	1.39447	0.00072281	0.220466	1	1.61493	5.96722e-07	TE	TE	1.58071	0.00417192	0.347794	0.497529	1.54856	0.0183804	0.0978087	0.971525	translation
ENSMUSG00000019978	Epb41l2	1.72957	0.000756101	-0.00424111	1	1.72533	1.30026e-05	TE	TE	1.66742	0.00433956	-0.241039	0.780319	1.7501	0.0170331	-3.50771	0.369622	translation
ENSMUSG00000062691	Cebpzos	-2.43226	0.000765045	-0.272018	1	-2.70428	1.9568e-07	TE	TE	-2.69271	0.00355985	-0.00972074	0.992816	-2.68713	0.0170331	1.96777	0.520272	translation
ENSMUSG00000071528	Usmg5	-2.28283	0.000856496	-0.803842	1	-3.08667	1.8746e-13	TE	TE	-3.22065	0.00355985	-0.43414	0.64413	-3.39788	0.0170331	-1.84331	0.642606	translation
ENSMUSG00000026766	Mmadhc	-1.52686	0.000863348	-0.334796	1	-1.86165	7.53847e-09	TE	TE	-1.90442	0.00393357	-0.573914	0.493571	-1.81405	0.0175501	0.635537	0.89794	translation
ENSMUSG00000071415	Rpl23	-3.3638	0.000865268	0.321544	1	-3.04226	0.000126774	TE	TE	-3.82301	0.029666	0.0104542	0.994845	-3.84519	0.0183401	1.40871	0.370522	translation
ENSMUSG00000040249	Lrp1	1.50883	0.00107318	0.615082	1	2.12391	6.33858e-12	TE	TE	2.0803	0.00355985	0.562755	0.433209	1.74796	0.0170331	-2.15049	0.370522	translation
ENSMUSG00000028649	Macf1	1.65308	0.00107839	-0.229944	1	1.42313	0.000313231	TE	TE	1.36105	0.0200034	-0.178635	0.723887	1.41897	0.0571797	-0.255969	0.786552	background
ENSMUSG00000043940	Wdfy3	1.7608	0.00107839	0.266729	1	2.02753	2.25335e-06	TE	TE	1.95134	0.00443176	0.156455	0.810133	1.8835	0.0183401	-0.603217	0.783274	translation
ENSMUSG00000035297	Cops4	-1.3522	0.00111097	-0.0222934	1	-1.3745	1.40411e-05	TE	TE	-1.42529	0.00761223	0.128667	0.81691	-1.40343	0.0270852	-0.0354028	0.985879	translation
ENSMUSG00000032381	Ciao2a	2.09538	0.00116546	-0.223032	1	1.87234	8.1244e-05	TE	TE	1.71348	0.016257	-0.0797417	0.890695	1.77777	0.0388838	-0.302107	0.776365	translation
ENSMUSG00000040488	Ltbp4	1.93549	0.00116546	-0.821195	0.87037	1.11429	0.0350713	TE	TE	0.971577	0.10186	-0.804985	0.169882	1.47779	0.341053	-0.872981	0.370522	background
ENSMUSG00000016252	Atp5e	-1.67882	0.0011701	-0.467976	1	-2.1468	1.76937e-10	TE	TE	-2.25522	0.00447121	-0.358706	0.497529	-2.13126	0.0326894	-0.177972	0.913304	translation
ENSMUSG00000018921	Pelp1	1.93466	0.0012126	0.1874	1	2.12206	1.17323e-06	TE	TE	2.06935	0.00355985	-0.153335	0.890296	2.05976	0.0170331	0.673305	0.921408	translation
ENSMUSG00000055485	Soga1	1.99725	0.00127724	-0.0518849	1	1.94537	4.72251e-05	TE	TE	1.96266	0.007118	-0.1074	0.864086	2.07192	0.0183401	-0.875459	0.537499	translation
ENSMUSG00000020196	Cabin1	1.59086	0.00133748	-0.0693818	1	1.52148	0.000463258	TE	TE	1.47878	0.00542113	-0.0614758	0.898404	1.47031	0.0210606	-0.00394317	0.998444	translation
ENSMUSG00000031565	Fgfr1	1.79753	0.00137929	0.369199	1	2.16672	4.66072e-07	TE	TE	2.1615	0.00393357	0.458451	0.454776	2.53576	0.0170331	1.99881	0.370522	translation
ENSMUSG00000024404	Riok3	-1.51009	0.00142847	0.279631	1	-1.23046	0.00252921	TE	TE	-1.30608	0.0156076	0.345477	0.454871	-0.522789	0.353983	0.0223631	0.976115	background
ENSMUSG00000024805	Pcgf5	-2.33301	0.00146759	0.274485	1	-2.05853	0.000182716	TE	TE	-2.66637	0.0452762	0.421681	0.475773	-3.46913	0.0839172	0.633754	0.53684	background
ENSMUSG00000073639	Rab18	-1.51136	0.00146759	-0.284978	1	-1.79634	6.16339e-08	TE	TE	-1.81687	0.00397673	-0.0660332	0.936325	-1.82152	0.0170331	-0.553538	0.907876	translation
ENSMUSG00000033327	Tnxb	2.07989	0.00147339	-0.563267	1	1.51662	0.0026407	TE	TE	1.34234	0.0414474	-0.546537	0.435152	2.16942	0.0178031	-1.24041	0.302989	translation
ENSMUSG00000020241	Col6a2	1.65438	0.00149314	0.276946	1	1.93132	8.11614e-08	TE	TE	1.92498	0.00380714	0.132787	0.874162	1.90093	0.0170331	-1.29744	0.773026	translation
ENSMUSG00000034566	Atp5h	-1.33073	0.00155765	-0.583886	1	-1.91461	1.46561e-11	TE	TE	-1.95988	0.00397673	-0.611508	0.231961	-2.4552	0.0225833	-1.1823	0.433594	translation
ENSMUSG00000012017	Scarf2	3.19143	0.00157804	0.398718	1	3.59015	3.56003e-05	TE	TE	3.38658	0.00355985	0.42512	0.506464	3.02792	0.0183401	-0.508755	0.816902	translation
ENSMUSG00000025224	Gbf1	1.40513	0.00157804	0.311716	1	1.71685	3.47219e-07	TE	TE	1.69659	0.0044654	0.364137	0.423532	1.32925	0.0642325	0.0477687	0.964398	background
ENSMUSG00000054752	Fsd1l	-1.36472	0.00167585	-0.434702	1	-1.79942	3.08731e-08	TE	TE	-1.83232	0.00442392	-0.381191	0.399615	-1.58646	0.0778246	-0.24478	0.789796	background
ENSMUSG00000037813	D630003M21Rik	3.09782	0.00174249	-0.361357	1	2.73647	0.00150818	TE	TE	2.38513	0.00802429	-0.0318593	0.980969	2.41123	0.0170331	-2.03964	0.373369	translation
ENSMUSG00000096054	Syne1	1.54555	0.00174472	-0.203022	1	1.34253	0.000680741	TE	TE	1.35397	0.00713397	-0.184993	0.792351	1.39116	0.023229	-0.83269	0.746659	translation
ENSMUSG00000033004	Mycbp2	1.68416	0.00178377	0.0595178	1	1.74368	8.07389e-05	TE	TE	1.63954	0.00687816	0.112834	0.830263	1.77835	0.0174815	0.815613	0.457444	translation
ENSMUSG00000000355	Mcts1	-2.63297	0.00179607	0.110199	1	-2.52277	5.81013e-05	TE	TE	-2.92546	0.00957026	-0.0234111	0.975488	-2.87284	0.0170331	0.830842	0.442432	translation
ENSMUSG00000036529	Sbf1	1.56381	0.00179607	0.194583	1	1.75839	1.33016e-05	TE	TE	1.73377	0.00542113	0.108633	0.846483	1.63256	0.0183401	-0.79217	0.552452	translation
ENSMUSG00000054808	Actn4	1.87773	0.00184049	-0.0210574	1	1.85667	1.38364e-05	TE	TE	1.74109	0.00895041	-0.384657	0.754982	1.94811	0.0170331	-2.9808	0.288641	translation
ENSMUSG00000026761	Orc4	-1.78048	0.00191557	-0.126454	1	-1.90693	2.76866e-05	TE	TE	-1.92291	0.00397673	0.132733	0.863822	-1.89035	0.0170331	-0.953442	0.778875	translation
ENSMUSG00000001150	Mcm3ap	1.8133	0.00239753	0.00248743	1	1.81578	0.000103965	TE	TE	1.79088	0.00911431	0.0960893	0.850241	1.9122	0.0243821	0.425116	0.667531	translation
ENSMUSG00000024878	Cbwd1	-2.23512	0.00239753	-0.0452983	1	-2.28042	0.000159321	TE	TE	-2.37785	0.00570225	0.2945	0.744534	-2.27278	0.0243821	-0.457679	0.875757	translation
ENSMUSG00000025153	Fasn	1.42757	0.00239753	0.45381	1	1.88138	1.07794e-08	TE	TE	1.81438	0.00436362	0.391369	0.469254	1.52879	0.0243821	-0.479254	0.761859	translation
ENSMUSG00000062078	Qk	-1.08141	0.00239753	-0.248226	1	-1.32963	6.90659e-07	TE	TE	-1.36198	0.00601749	-0.282837	0.551208	-1.40253	0.0258213	-0.397085	0.777189	translation
ENSMUSG00000018377	Vezf1	-1.37418	0.00251567	-0.142053	1	-1.51623	2.79705e-05	TE	TE	-1.51565	0.00397673	-0.129858	0.779714	-1.51123	0.0170331	0.00636168	0.999135	translation
ENSMUSG00000060373	Hnrnpc	-1.54948	0.00253162	-0.252112	1	-1.80159	1.17323e-06	TE	TE	-1.88251	0.00582636	-0.218601	0.651771	-1.7505	0.0327074	-0.0176647	0.990543	translation
ENSMUSG00000022272	Myo10	1.75328	0.00275107	-0.44898	1	1.3043	0.010415	TE	TE	1.30866	0.0111782	-0.810721	0.501425	1.30389	0.0401666	-0.767811	0.85215	translation
ENSMUSG00000066306	Numa1	1.39041	0.00284085	0.202701	1	1.59311	2.96963e-06	TE	TE	1.54468	0.00557057	0.302306	0.646223	1.36992	0.0210716	-1.17535	0.522924	translation
ENSMUSG00000022197	Pdzd2	1.47532	0.00297033	0.107688	1	1.58301	4.69577e-05	TE	TE	1.61148	0.00680101	0.0959975	0.853388	1.50262	0.0210832	-0.563406	0.609369	translation
ENSMUSG00000032777	Gtf3c1	1.1045	0.00297033	-0.195125	1	0.909377	0.008243	TE	TE	0.888503	0.0166461	-0.140752	0.758564	0.855001	0.0444634	0.0702276	0.957565	translation
ENSMUSG00000025332	Kdm5c	1.39307	0.00310287	0.104819	1	1.49789	5.81013e-05	TE	TE	1.44758	0.0055499	0.026886	0.962963	1.42923	0.0183401	-0.939881	0.530022	translation
ENSMUSG00000074364	Ehd2	1.23366	0.00313445	-0.163589	1	1.07007	0.0020548	TE	TE	1.04946	0.0177652	-0.0813881	0.860197	1.01796	0.0496658	0.00489876	0.998385	translation
ENSMUSG00000024387	Csnk2b	-1.25883	0.00322764	-0.176388	1	-1.43522	5.20845e-06	TE	TE	-1.46248	0.0044654	-0.380921	0.607911	-1.35586	0.0183401	2.25681	0.513245	translation
ENSMUSG00000062234	Gak	1.63299	0.003373	0.138906	1	1.7719	0.000103331	TE	TE	1.6881	0.00417192	0.389516	0.609908	1.80015	0.0170331	2.55859	0.490972	translation
ENSMUSG00000005397	Nid1	1.18253	0.00347947	-0.143311	1	1.03922	0.00203527	TE	TE	1.01135	0.0142917	-0.107826	0.830263	1.06405	0.031688	-0.522862	0.667531	translation
ENSMUSG00000001918	Slc1a5	2.07834	0.00348946	0.306945	1	2.38528	3.70324e-06	TE	TE	2.28869	0.00417192	0.104639	0.902958	2.297	0.0174815	0.348727	0.92255	translation
ENSMUSG00000025354	Dnajc14	1.81749	0.00350101	0.394121	1	2.21161	8.39427e-06	TE	TE	2.09278	0.00654185	0.401268	0.385505	3.16608	0.0268981	0.699184	0.397737	translation
ENSMUSG00000037058	Paip2	-1.76079	0.00350101	-0.424012	1	-2.1848	7.2281e-08	TE	TE	-2.32229	0.00761223	-0.426748	0.401631	-3.4065	0.0183804	-0.911049	0.370522	translation
ENSMUSG00000021910	Nisch	1.19713	0.00352	0.164569	1	1.3617	6.61772e-06	TE	TE	1.33983	0.00817729	0.204624	0.6367	1.28093	0.0553207	0.161482	0.839161	background
ENSMUSG00000024797		1.7284	0.0036405	0.238526	1	1.96693	4.38339e-06	TE	TE	1.90893	0.00394864	-0.0309451	0.975802	1.90075	0.0170331	2.13803	0.615272	translation
ENSMUSG00000028991	Mtor	1.27682	0.0036405	-0.05485	1	1.22197	0.000799137	TE	TE	1.18927	0.0106212	-0.0191978	0.970211	1.17688	0.0296125	0.218752	0.82088	translation
ENSMUSG00000020850	Prpf8	1.03429	0.00370692	0.1631	1	1.19739	1.56705e-05	TE	TE	1.1623	0.00759608	0.248017	0.604052	1.29164	0.0220063	0.89129	0.533875	translation
ENSMUSG00000039126	Prune2	1.59183	0.00370692	-0.510898	1	1.08093	0.0237208	TE	TE	0.997862	0.0488482	-0.453468	0.469484	0.717536	0.245328	-0.155237	0.896328	background
ENSMUSG00000035168	Tanc1	1.60973	0.00378104	-0.255347	1	1.35438	0.00370741	TE	TE	1.33442	0.00582636	-0.528504	0.575244	1.40579	0.0194708	-2.25627	0.641647	translation
ENSMUSG00000024773	Atg2a	1.58633	0.00379064	0.0277317	1	1.61406	0.000155727	TE	TE	1.57501	0.0044654	-0.206209	0.81124	1.54268	0.0183401	1.05372	0.797698	translation
ENSMUSG00000027900	Dram2	-1.7837	0.00408813	-0.0948381	1	-1.87854	0.000124505	TE	TE	-2.03022	0.0180662	-0.220756	0.711723	-1.94547	0.0652577	-0.105898	0.939097	background
ENSMUSG00000047213	Ythdf3	-1.49216	0.00413674	-0.318543	1	-1.8107	8.08498e-07	TE	TE	-1.86969	0.007118	-0.252245	0.566854	-2.5388	0.0243821	-0.492121	0.503567	translation
ENSMUSG00000022263	Trio	1.53975	0.00433308	0.245288	1	1.78504	1.77824e-05	TE	TE	1.72218	0.0044654	0.389466	0.589463	1.9873	0.0170331	2.60874	0.225264	translation
ENSMUSG00000027799	Nbea	1.67233	0.00433308	0.0530871	1	1.72542	0.000659355	TE	TE	1.69958	0.00436362	0.244848	0.740361	1.71605	0.0174815	0.608666	0.877491	translation
ENSMUSG00000031198	Fundc2	-1.69697	0.00433308	-0.452633	1	-2.1496	1.05863e-07	TE	TE	-2.22146	0.00443176	-0.840578	0.473883	-2.22828	0.0226405	-0.893115	0.855096	translation
ENSMUSG00000040327	Cul9	1.717	0.00437526	0.396878	1	2.11388	8.8172e-07	TE	TE	2.04775	0.00417192	0.478091	0.497529	1.77906	0.0194063	-1.00065	0.670434	translation
ENSMUSG00000001946	Esam	1.43391	0.00439164	-0.0666523	1	1.36725	0.000445513	TE	TE	1.31822	0.00908866	0.0766158	0.906956	1.27053	0.0243821	-0.899486	0.548925	translation
ENSMUSG00000021294	Kif26a	2.4283	0.00439164	-0.217784	1	2.21052	0.00129644	TE	TE	2.04337	0.0162863	-0.235824	0.724669	2.36455	0.0243821	-0.870532	0.484332	translation
ENSMUSG00000033955	Tnks1bp1	1.37904	0.00439164	-0.0648207	1	1.31422	0.00087038	TE	TE	1.30179	0.0101227	0.0325719	0.955709	1.29949	0.0306204	-0.0181825	0.991842	translation
ENSMUSG00000021806	Nid2	1.45907	0.0045057	-0.0752174	1	1.38385	0.000925221	TE	TE	1.3426	0.00456152	-0.0728452	0.898867	1.33964	0.0183401	0.158504	0.966605	translation
ENSMUSG00000053158	Fes	2.53077	0.0045057	0.363067	1	2.89383	1.56705e-05	TE	TE	2.73948	0.00436362	0.0975521	0.92225	2.68747	0.0170331	-1.42584	0.65051	translation
ENSMUSG00000030122	Ptms	1.92885	0.00477953	-0.268411	1	1.66044	0.000603999	TE	TE	1.58346	0.00763852	-0.551452	0.569785	1.37672	0.0321416	0.900617	0.734929	translation
ENSMUSG00000071662	Polr2g	-1.52231	0.00477953	-0.0282382	1	-1.55055	0.000236938	TE	TE	-1.69827	0.0120435	0.0930557	0.852294	-1.79741	0.030855	0.310937	0.735642	translation
ENSMUSG00000022338	Eny2	-1.93716	0.00482598	0.0310691	1	-1.90609	0.000172278	TE	TE	-2.01427	0.00680101	-0.0777753	0.897794	-2.0508	0.0238074	-0.342273	0.812163	translation
ENSMUSG00000027287	Snap23	-1.72665	0.00482598	-0.0602146	1	-1.78686	4.96285e-05	TE	TE	-1.85523	0.00593326	-0.0515721	0.943122	-1.81602	0.0183401	0.956626	0.570194	translation
ENSMUSG00000051730	Mettl5	-2.3327	0.00488904	-0.129526	1	-2.46222	8.38917e-05	TE	TE	-2.69254	0.0145294	-0.0636772	0.897396	-2.52775	0.0447532	0.0826892	0.918202	translation
ENSMUSG00000032030	Cul5	-1.39744	0.00551158	0.0839788	1	-1.31346	0.001065	TE	TE	-1.41899	0.0149546	0.277361	0.690383	-1.54607	0.0347458	0.755223	0.650779	translation
ENSMUSG00000025903	Lypla1	-1.44886	0.00555164	-0.250929	1	-1.69979	1.45883e-05	TE	TE	-1.77827	0.00624657	-0.219082	0.612147	-1.41008	0.0743436	-0.0442319	0.956863	background
ENSMUSG00000038855	Itpkb	1.38884	0.00556871	-0.776801	0.848883	0.612039	0.472599	TE	TE	0.556695	0.143601	-0.691585	0.199415	1.38684	0.089062	-0.877578	0.351712	background
ENSMUSG00000047459	Dynlrb1	-1.51332	0.00556871	-0.0975414	1	-1.61086	2.60535e-05	TE	TE	-1.74006	0.0112115	0.0718032	0.906823	-1.72647	0.0357492	-0.0229834	0.989493	translation
ENSMUSG00000042286	Stab1	2.09515	0.00563963	0.859002	1	2.95415	3.72998e-10	TE	TE	2.81088	0.00436362	0.645736	0.569091	2.40694	0.0170331	-1.9666	0.516228	translation
ENSMUSG00000004364	Cul3	-1.03271	0.00569898	-0.0635505	1	-1.09626	0.000447827	TE	TE	-1.13351	0.00970759	-0.0603991	0.895288	-1.20072	0.0245531	-0.260072	0.727423	translation
ENSMUSG00000025920	Stau2	-1.50763	0.00569898	-0.464595	1	-1.97222	2.18439e-06	TE	TE	-1.95144	0.00393357	-0.526004	0.336773	-1.7575	0.0246094	0.00850699	0.998385	translation
ENSMUSG00000022892	App	1.26043	0.00589685	0.132511	1	1.39294	3.12168e-05	TE	TE	1.3655	0.00683098	-0.0851381	0.927366	1.39495	0.0183401	-2.55603	0.379906	translation
ENSMUSG00000037062	Sh3glb1	-0.975297	0.00612705	-0.248788	1	-1.22409	1.09137e-05	TE	TE	-1.24272	0.00553349	-0.281316	0.556339	-1.27875	0.0194708	-0.818065	0.767624	translation
ENSMUSG00000091898	Tnnc1	-1.23478	0.00612705	-0.519998	1	-1.75477	5.30707e-09	TE	TE	-1.80636	0.0044654	-0.529651	0.351207	-1.64563	0.0381335	-0.21568	0.911824	translation
ENSMUSG00000028639	Ybx1	1.48847	0.0061666	-0.103766	1	1.3847	0.000863492	TE	TE	1.34413	0.0114056	-0.328521	0.70444	1.36231	0.035795	-0.490583	0.855096	translation
ENSMUSG00000036860	Mrpl55	-1.12059	0.00618069	-0.637776	1	-1.75837	1.67924e-10	TE	TE	-1.78098	0.00355985	-0.633547	0.207403	-1.55464	0.0226405	0.298741	0.91147	translation
ENSMUSG00000029649	Pomp	-1.38248	0.00624869	0.0859611	1	-1.29651	0.000910386	TE	TE	-1.37443	0.0121	0.299513	0.657679	-1.27923	0.0444337	-0.0983109	0.959205	translation
ENSMUSG00000033191	Tie1	1.60219	0.00631074	-0.372575	1	1.22961	0.012513	TE	TE	1.13033	0.0339231	-0.392621	0.494866	1.42087	0.0582882	-0.692055	0.523981	background
ENSMUSG00000060938	Rpl26	-2.07262	0.00639321	0.253002	1	-1.81962	0.00236892	TE	TE	-1.88334	0.0107005	-0.318664	0.850672	-1.89353	0.0344186	-0.534211	0.918202	translation
ENSMUSG00000030409	Dmpk	1.20357	0.00647781	-0.156701	1	1.04686	0.00470171	TE	TE	0.995579	0.0246732	-0.105813	0.837452	1.02979	0.0538542	-0.248075	0.810046	background
ENSMUSG00000002968	Med25	1.09673	0.00653369	0.216391	1	1.31312	3.42594e-05	TE	TE	1.30233	0.00593504	0.176832	0.695486	1.30127	0.0243199	0.172161	0.907876	translation
ENSMUSG00000037152	Ndufc1	1.48597	0.00653369	-0.611029	1	0.874937	0.0916459	TE	TE	0.787159	0.097878	-0.408341	0.552944	1.16609	0.0467371	-0.892664	0.379906	translation
ENSMUSG00000051285	Pcmtd1	-1.75041	0.00653369	-0.443824	1	-2.19424	3.45431e-06	TE	TE	-2.40188	0.0072818	-0.301312	0.686723	-2.40322	0.0300981	-0.305682	0.89398	translation
ENSMUSG00000078566	Bnip3	-2.01075	0.00653369	0.123704	1	-1.88705	0.000255054	TE	TE	-1.89379	0.00524641	-0.00600181	0.996375	-1.89272	0.0202591	0.566438	0.857525	translation
ENSMUSG00000001119	Col6a1	1.4704	0.00657538	0.252911	1	1.72331	5.18444e-06	TE	TE	1.71006	0.00397673	-0.0573011	0.962462	1.71959	0.0170331	-3.64939	0.55738	translation
ENSMUSG00000020576	Nbas	1.27359	0.00658785	0.232036	1	1.50563	4.35924e-05	TE	TE	1.47446	0.0043866	0.279985	0.574922	1.50804	0.0183401	0.58126	0.807224	translation
ENSMUSG00000022884	Eif4a2	-1.4026	0.00658785	-0.171531	1	-1.57414	2.32044e-05	TE	TE	-1.64019	0.00761223	-0.17821	0.754686	-1.43562	0.0237303	0.691051	0.535121	translation
ENSMUSG00000095115	Itpripl2	1.92374	0.00658785	0.445424	1	2.36917	5.87004e-05	TE	TE	2.23528	0.00355985	0.416094	0.455075	1.94205	0.0170331	-1.65314	0.429088	translation
ENSMUSG00000032198	Dock6	1.76951	0.00674364	-0.336984	1	1.43253	0.00764971	TE	TE	1.48438	0.00953585	-0.30637	0.692487	1.50965	0.0326018	-0.47525	0.839161	translation
ENSMUSG00000024997	Prdx3	-1.07052	0.0067986	-0.353536	1	-1.42406	3.56574e-07	TE	TE	-1.45543	0.0044654	-0.385121	0.469254	-1.70947	0.0170331	-2.32141	0.225264	translation
ENSMUSG00000030123	Plxnd1	1.33487	0.0067986	-0.0878213	1	1.24705	0.00225019	TE	TE	1.18941	0.0120435	-0.187485	0.759775	1.18796	0.0366166	-0.176341	0.926993	translation
ENSMUSG00000037321	Tap1	2.25826	0.0067986	0.874942	1	3.1332	6.49723e-07	TE	TE	2.97352	0.00310203	0.780517	0.251878	3.17979	0.0170331	2.39883	0.628862	translation
ENSMUSG00000054874	Pcnx3	1.95738	0.0067986	0.523667	1	2.48105	3.33892e-05	TE	TE	2.4933	0.0113408	0.499064	0.320433	3.31194	0.0787393	0.66483	0.463341	background
ENSMUSG00000040964	Arhgef10l	1.16536	0.0068321	0.331713	1	1.49707	2.93275e-06	TE	TE	1.47167	0.00624657	0.296629	0.518347	1.38488	0.039778	0.170283	0.888697	translation
ENSMUSG00000037552	Plekhg2	2.04936	0.0068395	0.164792	1	2.21416	0.000659355	TE	TE	2.07297	0.00399482	0.462186	0.624019	2.08836	0.0178031	0.66371	0.890429	translation
ENSMUSG00000026483	Fam129a	1.57107	0.0069756	0.000363378	1	1.57143	0.000590777	TE	TE	1.51339	0.00680101	0.0202043	0.975322	1.50421	0.0225556	-0.450317	0.775431	translation
ENSMUSG00000041445	Mmrn2	1.44037	0.00705825	-0.0894821	1	1.35089	0.00131013	TE	TE	1.29206	0.0106212	0.141612	0.859191	1.22984	0.0272864	-1.05902	0.601137	translation
ENSMUSG00000020385	Clk4	-2.21767	0.0073053	-0.297122	1	-2.51479	4.7056e-05	TE	TE	-2.4582	0.0056742	-0.286574	0.731486	-2.43348	0.0243821	-0.145188	0.960469	translation
ENSMUSG00000038664	Herc1	1.41422	0.007364	-0.19865	1	1.21557	0.00897445	TE	TE	1.21925	0.00907337	-0.274251	0.680499	1.2543	0.0277983	-0.620226	0.786554	translation
ENSMUSG00000038260	Trpm4	2.37404	0.00743875	-0.501368	1	1.87267	0.0140112	TE	TE	1.71802	0.0056742	-0.730281	0.420554	1.62861	0.030855	-0.240733	0.949597	translation
ENSMUSG00000032737	Inppl1	0.989249	0.00756841	-0.137695	1	0.851553	0.0155701	TE	TE	0.826168	0.0259459	-0.091884	0.830781	0.929027	0.0437751	-0.248487	0.709004	translation
ENSMUSG00000039016	Timm8b	-1.34343	0.00756841	-0.500672	1	-1.8441	3.77935e-08	TE	TE	-1.92357	0.00532974	-0.420893	0.41554	-1.23098	0.0431155	0.363088	0.68498	translation
ENSMUSG00000023938	Aars2	1.52404	0.0079493	-0.0439338	1	1.48011	0.000836999	TE	TE	1.41677	0.00650084	0.265494	0.770615	1.31327	0.0187746	-2.41503	0.370522	translation
ENSMUSG00000001435	Col18a1	1.84812	0.00797704	0.55232	1	2.40044	7.75773e-07	TE	TE	2.33673	0.00397673	0.545944	0.448158	2.30875	0.0210832	0.435026	0.887431	translation
ENSMUSG00000028763	Hspg2	1.29011	0.00802416	-0.0298717	1	1.26024	0.000911817	TE	TE	1.18594	0.0196625	-0.0182526	0.975802	1.20742	0.0330395	-0.477343	0.599514	translation
ENSMUSG00000035011	Zbtb7a	1.47326	0.00828079	0.164682	1	1.63794	4.30605e-05	TE	TE	1.60933	0.00994098	0.286634	0.609185	1.58043	0.0430768	0.232099	0.867798	translation
ENSMUSG00000067194	Eif1ax	-1.898	0.00828079	-0.0482323	1	-1.94623	0.000113582	TE	TE	-2.23286	0.0166682	-0.0391075	0.934549	-2.00673	0.019001	0.263003	0.666	translation
ENSMUSG00000036504	Phpt1	-1.35857	0.00829029	-0.322501	1	-1.68107	1.50394e-06	TE	TE	-1.7224	0.00443176	0.0363582	0.97366	-1.73404	0.0170331	2.61251	0.467156	translation
ENSMUSG00000000148	Brat1	2.04734	0.00863831	0.657432	1	2.70477	2.51148e-06	TE	TE	2.80009	0.00433956	0.566791	0.332245	2.60372	0.0418309	0.374039	0.82379	translation
ENSMUSG00000020135	Apc2	2.08819	0.00869139	-0.0684376	1	2.01976	0.00127607	TE	TE	1.88964	0.00399482	-0.138908	0.830781	1.81747	0.0170331	1.32811	0.57131	translation
ENSMUSG00000028776	Tinagl1	1.78112	0.00869139	-0.778953	1	1.00217	0.10964	TE	TE	1.0082	0.0500331	-0.782614	0.37839	1.52418	0.0352123	-1.57798	0.369622	translation
ENSMUSG00000022800	Fyttd1	-1.07329	0.00878752	-0.135331	1	-1.20862	0.000155296	TE	TE	-1.22352	0.00786623	-0.117748	0.783332	-1.08878	0.0357492	0.1051	0.901204	translation
ENSMUSG00000027011	Ube2e3	-1.45702	0.00891394	-0.0952326	1	-1.55226	0.000495426	TE	TE	-1.58254	0.00443176	0.0111282	0.987816	-1.58883	0.0170331	1.2887	0.500446	translation
ENSMUSG00000037149	Ddx1	-1.24263	0.00891394	0.285768	1	-0.956862	0.03093	TE	TE	-1.03472	0.0260155	0.300576	0.521373	-0.712909	0.200566	0.0721794	0.934874	background
ENSMUSG00000027823	Gmps	-1.53199	0.00899649	-0.246799	1	-1.77878	2.50641e-05	TE	TE	-1.8861	0.00929045	-0.272628	0.56191	-1.25161	0.0976295	0.0661355	0.939042	background
ENSMUSG00000020220	Vps13d	1.39297	0.00924205	-0.173914	1	1.21906	0.00603017	TE	TE	1.22049	0.00889462	-0.170249	0.822374	1.24652	0.0252394	-0.792195	0.775289	translation
ENSMUSG00000021313	Ryr2	0.925902	0.00924205	-0.522314	1	0.403589	0.794376	TE	TE	0.38319	0.177283	-0.488872	0.369946	0.433976	0.216755	-0.635163	0.579473	background
ENSMUSG00000029675	Eln	1.78599	0.00924205	-0.450494	1	1.3355	0.0119219	TE	TE	1.31024	0.0423969	-0.290279	0.669918	1.09291	0.130711	0.0617335	0.963269	background
ENSMUSG00000060981	Hist1h4h	-1.43361	0.00936098	-0.183647	1	-1.61726	3.0696e-05	TE	TE	-1.66034	0.0044654	0.00167619	0.999082	-1.6607	0.0183401	0.97252	0.766747	translation
ENSMUSG00000024048	Myl12a	-1.2103	0.00944377	0.0496548	1	-1.16065	0.00236172	TE	TE	-1.20795	0.00991435	0.043152	0.935802	-1.24297	0.0243199	0.674378	0.5437	translation
ENSMUSG00000003549	Ercc1	1.70777	0.00961214	-0.143281	1	1.56449	0.00125568	TE	TE	1.46132	0.0147168	-0.363133	0.686294	1.27031	0.0430768	0.694092	0.716128	translation
ENSMUSG00000052384	Nrros	3.14438	0.00961214	1.26289	1	4.40727	3.4221e-05	TE	TE	4.19559	0.00417192	1.01253	0.332245	3.58781	0.0338371	-0.104626	0.97843	translation
ENSMUSG00000034247	Plekhm1	1.90878	0.0096807	0.206951	1	2.11573	0.000347957	TE	TE	2.16602	0.00455798	-0.0653165	0.946901	2.16108	0.019496	0.166401	0.964051	translation
ENSMUSG00000000058	Cav2	1.55382	0.00972916	-0.392762	1	1.16106	0.0237493	TE	TE	1.11777	0.0204665	-0.648429	0.462748	0.926443	0.0927589	0.0727695	0.974362	background
ENSMUSG00000035279	Ssc5d	1.90422	0.00972916	0.210276	1	2.1145	4.83896e-05	TE	TE	2.0388	0.00355985	0.131498	0.853346	2.04882	0.0170331	0.561699	0.901204	translation
ENSMUSG00000020272	Stk10	1.65183	0.00992803	-0.0792012	1	1.57263	0.00225019	TE	TE	1.59016	0.0178011	0.139518	0.830781	1.49678	0.0496658	-0.241946	0.858149	translation
ENSMUSG00000033170	Card10	1.98182	0.00992803	-0.522936	1	1.45888	0.0264833	TE	TE	1.47399	0.0147254	-0.759606	0.389276	1.67045	0.0486642	-1.20111	0.588798	translation
ENSMUSG00000047260	Emc6	1.80623	0.00992803	-0.340194	1	1.46603	0.00547951	TE	TE	1.40126	0.0214883	-0.279689	0.736532	1.24279	0.0583894	0.450186	0.786396	background
ENSMUSG00000061751	Kalrn	1.47827	0.00992803	-0.283273	1	1.195	0.0165168	TE	TE	1.24166	0.0232375	-0.371722	0.517867	1.38029	0.0658747	-0.548559	0.652027	background
ENSMUSG00000030614	Tmem126b	-1.74065	0.00997277	-0.288953	1	-2.02961	3.0148e-05	TE	TE	-2.10983	0.00485439	-0.360955	0.498374	-2.00466	0.0329512	-0.192529	0.907789	translation
ENSMUSG00000030591	Psmd8	-1.14455	0.0100221	0.0892003	1	-1.05535	0.00358603	TE	TE	-1.09451	0.0164518	0.0705263	0.880677	-1.22323	0.0243821	0.426402	0.539228	translation
ENSMUSG00000031347	Cetn2	-1.70118	0.0104565	-0.000630981	1	-1.70182	0.000475142	TE	TE	-1.72653	0.0044654	0.0970005	0.834145	-1.83637	0.0170331	0.542334	0.612494	translation
ENSMUSG00000008976	Gabpa	-1.24375	0.0105655	0.0913798	1	-1.15237	0.00604184	TE	TE	-1.12915	0.0145294	0.217251	0.662729	-1.21061	0.0390618	0.410957	0.709004	translation
ENSMUSG00000045962	Wnk1	1.21989	0.0105725	-0.303566	1	0.916327	0.0427155	TE	TE	0.829626	0.0691101	-0.259767	0.562566	1.34235	0.0685218	-0.398619	0.539228	background
ENSMUSG00000046743	Fat4	2.03556	0.0106513	-0.190687	1	1.84487	0.0089033	TE	TE	2.14151	0.0475772	-0.0597371	0.943772	2.1907	0.0864051	-0.327592	0.812163	background
ENSMUSG00000027878	Notch2	1.38993	0.0107104	0.32885	1	1.71878	1.51015e-05	TE	TE	1.65555	0.00570225	0.17015	0.813772	1.53771	0.0174815	-1.52148	0.379906	translation
ENSMUSG00000032855	Pkd1	1.30038	0.0107359	0.133307	1	1.43369	0.000603999	TE	TE	1.39373	0.0139412	0.181242	0.697592	1.37584	0.0545593	0.161208	0.860111	background
ENSMUSG00000046603	Tcaim	-1.89437	0.0107359	-0.268683	1	-2.16305	1.58866e-05	TE	TE	-2.16375	0.00355985	0.0407856	0.979636	-2.16291	0.0170331	-0.447085	0.963329	translation
ENSMUSG00000002064	Sdf2	-1.20416	0.0107973	0.159435	1	-1.04473	0.010415	TE	TE	-1.0638	0.0130064	0.400611	0.572939	-0.908424	0.0430835	-0.8694	0.646747	translation
ENSMUSG00000041341	Atg2b	1.34817	0.0109999	0.0822946	1	1.43047	0.00147068	TE	TE	1.40762	0.0107622	0.105734	0.805801	1.10734	0.0582239	-0.0712612	0.917695	background
ENSMUSG00000037344	Slc12a9	2.64957	0.0111548	0.462355	1	3.11192	0.00021439	TE	TE	2.81048	0.0044654	0.527748	0.332245	3.51978	0.0246907	0.969689	0.461884	translation
ENSMUSG00000001029	Icam2	2.1603	0.011386	-0.453127	1	1.70717	0.00839491	TE	TE	1.49256	0.0523908	-0.462925	0.385635	1.24637	0.343196	-0.406968	0.633477	background
ENSMUSG00000027314	Dll4	1.86526	0.0114072	-0.583118	1	1.28214	0.0568849	TE	TE	1.1721	0.0242912	-0.709127	0.267475	0.999636	0.19205	-0.545967	0.685137	background
ENSMUSG00000001642	Akr1b3	-2.20218	0.0118052	-0.471277	1	-2.67346	3.05258e-05	TE	TE	-2.92785	0.0106212	-0.463253	0.429185	-3.50424	0.0418063	-0.753285	0.539228	translation
ENSMUSG00000021904	Sema3g	1.55599	0.0123542	-0.136548	1	1.41944	0.00343303	TE	TE	1.37734	0.0079554	0.137871	0.888751	1.35297	0.0251744	-0.755685	0.813855	translation
ENSMUSG00000024127	Prepl	-1.2304	0.0123542	0.0676518	1	-1.16275	0.00272892	TE	TE	-1.17411	0.0122239	0.0673511	0.912813	-1.18541	0.0332844	0.270667	0.872163	translation
ENSMUSG00000027583	Zbtb46	2.2597	0.0123542	-0.247256	1	2.01244	0.00827841	TE	TE	1.867	0.0228584	0.055745	0.952529	1.82277	0.0447532	-0.587988	0.716123	translation
ENSMUSG00000031214	Ophn1	3.18461	0.0123542	0.305741	1	3.49035	0.00582095	TE	TE	3.38307	0.00786623	0.096555	0.909948	3.42379	0.0270945	0.399269	0.853179	translation
ENSMUSG00000036644	Tbc1d9b	1.17554	0.0123542	0.118208	1	1.29374	0.000459207	TE	TE	1.25533	0.00811939	0.0559828	0.918	1.22843	0.0245395	-0.456675	0.747827	translation
ENSMUSG00000020357	Flt4	1.6024	0.0126197	-0.108898	1	1.4935	0.00846442	TE	TE	1.41254	0.00542113	0.182471	0.829599	1.39847	0.0206553	-0.463928	0.918202	translation
ENSMUSG00000033365	Ipo13	1.2476	0.0126197	-0.496174	1	0.751428	0.210674	TE	TE	0.723183	0.0740057	-0.329413	0.57815	0.972643	0.0578231	-0.740007	0.446331	background
ENSMUSG00000020483	Dynll2	1.22717	0.0128869	-1.03588	0.124935	0.191291	1	TE	TE	0.159047	0.63288	-1.036	0.169013	-0.102897	0.867838	-0.963302	0.370522	background
ENSMUSG00000020849	Ywhae	-0.912657	0.0128869	-0.127877	1	-1.04053	0.000268878	TE	TE	-1.0707	0.00998682	-0.164443	0.734512	-0.971543	0.0327863	0.60515	0.628862	translation
ENSMUSG00000028514	Usp24	1.04227	0.0128869	0.187064	1	1.22933	0.00034462	TE	TE	1.24396	0.00907952	0.169403	0.72488	1.1684	0.034985	-0.0913709	0.944066	translation
ENSMUSG00000028710	Atpaf1	1.97639	0.0128869	-1.02402	1	0.952367	0.189933	TE	TE	0.790835	0.173623	-0.482037	0.722377	0.913933	0.193274	-0.868133	0.68498	background
ENSMUSG00000030102	Itpr1	1.36675	0.0128869	-0.00448458	1	1.36227	0.00354331	TE	TE	1.32063	0.00447121	0.0701099	0.921427	1.33163	0.0174815	4.22228	0.446331	translation
ENSMUSG00000031519	Asb5	-1.74271	0.0128869	0.481228	1	-1.26148	0.0487479	TE	TE	-1.29013	0.0233931	0.529059	0.418737	-1.01131	0.154613	0.199595	0.886042	background
ENSMUSG00000092607	Scnm1	-1.42543	0.0128869	-0.440132	1	-1.86556	5.58553e-06	TE	TE	-1.85946	0.00380714	-0.118083	0.898867	-1.89046	0.0170331	-3.26716	0.47633	translation
ENSMUSG00000024620	Pdgfrb	1.2228	0.0129657	0.330944	1	1.55374	1.05925e-05	TE	TE	1.54244	0.0043866	-0.0945474	0.949162	1.55021	0.0170331	-2.98348	0.720632	translation
ENSMUSG00000019820	Utrn	1.14338	0.0131218	-0.227377	1	0.916005	0.0388694	TE	TE	0.869787	0.0226631	-0.199274	0.712998	0.77259	0.0617126	0.424188	0.730244	background
ENSMUSG00000025278	Flnb	1.44655	0.0135754	-0.570595	1	0.875951	0.166597	TE	TE	0.837276	0.0803203	-0.480941	0.4226	0.90227	0.205605	-0.5264	0.614523	background
ENSMUSG00000026361	Cdc73	-1.47927	0.0140619	-0.390302	1	-1.86957	1.32975e-05	TE	TE	-1.90314	0.00397673	-0.668754	0.469484	-1.89075	0.0183401	-0.522433	0.919292	translation
ENSMUSG00000031659	Adcy7	2.52876	0.0140619	0.681953	1	3.21071	5.52391e-05	TE	TE	2.8838	0.00441218	0.264823	0.841043	2.84436	0.0185144	-0.514612	0.921574	translation
ENSMUSG00000045374	Wdr81	1.85744	0.0143809	0.408028	1	2.26547	3.0696e-05	TE	TE	2.20267	0.00665559	0.0351641	0.979636	2.18956	0.0209058	-1.42958	0.678871	translation
ENSMUSG00000033396	Spg11	1.51977	0.0147749	0.420886	1	1.94065	6.82263e-05	TE	TE	1.85631	0.00433956	0.3949	0.468301	1.67135	0.0243821	-0.175521	0.92856	translation
ENSMUSG00000032411	Tfdp2	-1.77103	0.0147815	-0.131189	1	-1.90222	0.000260379	TE	TE	-1.98016	0.0116588	-0.159698	0.828967	-1.8835	0.0368695	0.325622	0.849091	translation
ENSMUSG00000029406	Pitpnm2	1.47883	0.0147875	-0.0619554	1	1.41687	0.00310863	TE	TE	1.32945	0.0236434	-0.0878454	0.867455	1.3807	0.0537945	-0.216802	0.814159	background
ENSMUSG00000033209	Ttc28	1.74341	0.0147875	0.204853	1	1.94826	0.000659355	TE	TE	1.83416	0.00680101	0.055172	0.939221	1.80864	0.0227208	-0.547595	0.776365	translation
ENSMUSG00000045930	Clec14a	2.12664	0.0149756	-0.486327	1	1.64031	0.019962	TE	TE	1.43697	0.0391462	-0.675048	0.423662	1.44576	0.140278	-0.684787	0.685137	background
ENSMUSG00000025017	Pik3ap1	3.19567	0.0149999	0.974074	1	4.16974	4.94964e-05	TE	TE	3.71393	0.00372085	1.04559	0.374637	2.91459	0.0170331	-2.0243	0.521221	translation
ENSMUSG00000027165	B230118H07Rik	-1.80502	0.0149999	-0.101072	1	-1.90609	0.000365588	TE	TE	-1.97193	0.00905569	0.21712	0.850166	-1.81426	0.0170331	-1.99756	0.351712	translation
ENSMUSG00000048416	Mlf1	-1.45859	0.0149999	-0.722152	1	-2.18074	1.52398e-08	TE	TE	-2.32836	0.00711552	-0.73198	0.178301	-2.84064	0.138013	-0.841426	0.420424	background
ENSMUSG00000074582	Arfgef2	1.02991	0.0149999	-0.0521092	1	0.977798	0.0101084	TE	TE	0.993729	0.0166265	-0.0565257	0.907608	1.0258	0.0368695	-0.287375	0.760363	translation
ENSMUSG00000075054	Yae1d1	2.22501	0.0149999	-0.114832	1	2.11018	0.000659355	TE	TE	1.84673	0.0249452	0.148111	0.837452	1.73004	0.0647584	-0.23184	0.87213	background
ENSMUSG00000052957	Gas1	2.40674	0.0151624	-0.678859	1	1.72788	0.0199431	TE	TE	1.55299	0.0639898	-0.424968	0.598732	1.63169	0.143167	-0.501977	0.727522	background
ENSMUSG00000027580	Helz2	1.58605	0.0155837	0.130647	1	1.7167	0.00199484	TE	TE	1.62667	0.00542113	0.10131	0.860121	1.60142	0.0210832	-0.204744	0.9178	translation
ENSMUSG00000070469	Adamtsl3	1.8431	0.015946	0.569954	1	2.41305	3.45365e-05	TE	TE	2.3928	0.00393357	0.253132	0.804116	2.32401	0.0170331	-1.42566	0.746371	translation
ENSMUSG00000023307	March5	-1.34876	0.0160037	0.062006	1	-1.28676	0.0058945	TE	TE	-1.39807	0.0233931	0.199374	0.691056	-1.38767	0.0793327	0.189544	0.836475	background
ENSMUSG00000025240	Sacm1l	-1.38493	0.0160745	0.0656284	1	-1.3193	0.00386109	TE	TE	-1.49091	0.0298438	0.285116	0.690044	-1.56212	0.0727361	0.427644	0.769576	background
ENSMUSG00000046229	Scand1	1.54153	0.0163233	-0.455123	1	1.08641	0.0503475	TE	TE	1.02847	0.0326296	-0.505273	0.38971	0.622469	0.275051	-0.123743	0.910787	background
ENSMUSG00000058571	Gpc6	1.57219	0.0163972	0.0396801	1	1.61187	0.0015822	TE	TE	1.52863	0.00761223	0.301342	0.696393	1.36694	0.0245531	-1.03768	0.601137	translation
ENSMUSG00000031691	Tnpo2	1.19199	0.0164405	0.364323	1	1.55631	3.18626e-05	TE	TE	1.67281	0.00904495	0.472432	0.335866	1.76496	0.102546	0.511413	0.598799	background
ENSMUSG00000021282	Eif5	-1.35686	0.0168569	0.136839	1	-1.22002	0.00906235	TE	TE	-1.26513	0.0236698	0.0616271	0.919532	-1.21898	0.0531339	-0.288811	0.790349	background
ENSMUSG00000079442	St6galnac4	1.69752	0.0168569	0.489778	1	2.18729	3.95648e-05	TE	TE	2.29684	0.0072818	0.638493	0.359755	2.20139	0.0583238	0.524919	0.774528	background
ENSMUSG00000037110	Ralgapa2	1.39411	0.0169485	-0.328172	1	1.06593	0.0540944	TE	TE	1.02377	0.0176412	-0.294524	0.650412	1.05807	0.0441587	-0.50141	0.78373	translation
ENSMUSG00000018750	Zbtb4	1.4168	0.0171542	0.0026661	1	1.41946	0.00236172	TE	TE	1.34412	0.0193431	0.147108	0.79033	1.19714	0.0540447	-0.246795	0.806967	background
ENSMUSG00000000563	Atp5f1	-1.06448	0.0173666	-0.475908	1	-1.54039	5.52951e-07	TE	TE	-1.5828	0.00471907	-0.624845	0.419722	-1.54486	0.0243821	-0.341649	0.925831	translation
ENSMUSG00000020547	Bzw2	-0.947055	0.0173666	-0.367481	1	-1.31454	3.7678e-06	TE	TE	-1.34059	0.00508214	-0.366051	0.454871	-1.46222	0.0187746	-1.04192	0.601137	translation
ENSMUSG00000027108	Ola1	-1.23444	0.0173666	-0.0908167	1	-1.32525	0.00087038	TE	TE	-1.37141	0.00761223	-0.0734807	0.877963	-1.26897	0.0243821	0.365908	0.667531	translation
ENSMUSG00000031660	Brd7	-1.14446	0.0173666	-0.310769	1	-1.45523	3.71944e-05	TE	TE	-1.48045	0.0044654	-0.0791196	0.920786	-1.49475	0.0174815	-1.688	0.681213	translation
ENSMUSG00000036707	Cab39	-1.14594	0.0173666	-0.322815	1	-1.46876	2.31956e-05	TE	TE	-1.49693	0.00436362	-0.573967	0.501583	-1.5017	0.0175364	-0.741932	0.918202	translation
ENSMUSG00000067158	Col4a4	2.52355	0.0176637	-1.16804	1	1.35551	0.160312	TE	TE	0.987276	0.292732	-0.727528	0.543645	1.75075	0.0998447	-1.20055	0.411277	background
ENSMUSG00000029344	Tpst2	1.54692	0.0177857	0.24005	1	1.78697	0.000145358	TE	TE	1.68151	0.0101355	0.340626	0.542455	1.7164	0.0459615	0.390255	0.768809	translation
ENSMUSG00000001151	Pcnt	1.53701	0.0178595	0.00547154	1	1.54248	0.00110412	TE	TE	1.44329	0.0146199	-0.186849	0.83903	1.5023	0.0344573	-0.870642	0.703574	translation
ENSMUSG00000021223	Papln	1.91453	0.0178595	-1.26675	0.611406	0.647776	0.611717	TE	TE	0.531684	0.366273	-1.2449	0.100836	0.435743	0.873007	-1.24086	0.282434	background
ENSMUSG00000003184	Irf3	1.07228	0.0179671	0.0151189	1	1.08739	0.00495727	TE	TE	1.07005	0.00785426	0.133219	0.786706	1.11194	0.0225833	1.68816	0.461884	translation
ENSMUSG00000014905	Dnajb9	-1.73818	0.0180271	-0.350195	1	-2.08838	5.64896e-05	TE	TE	-2.09178	0.00508395	-0.368975	0.473363	-2.49427	0.0204684	-0.877197	0.491592	translation
ENSMUSG00000019261	Map1s	1.31502	0.0182234	0.569425	1	1.88444	8.8172e-07	TE	TE	1.82922	0.0043866	0.648974	0.240948	1.83696	0.0390618	0.66106	0.709004	translation
ENSMUSG00000061603	Akap6	0.880053	0.0182593	-0.12261	1	0.757442	0.0432576	TE	TE	0.727808	0.0359186	-0.0837534	0.862426	0.772211	0.056649	-0.417921	0.666	background
ENSMUSG00000026753	Ppp6c	-1.15085	0.0183852	-0.0278147	1	-1.17866	0.00284615	TE	TE	-1.21406	0.00893357	-0.0706318	0.890367	-1.15641	0.0265035	0.442105	0.679521	translation
ENSMUSG00000033253	Szt2	1.6243	0.0186296	-0.204568	1	1.41974	0.029604	TE	TE	1.44761	0.0113029	-0.177956	0.770812	1.40604	0.0381335	0.01996	0.991842	translation
ENSMUSG00000001248	Gramd1a	1.10316	0.0191984	0.13676	1	1.23992	0.00137572	TE	TE	1.19866	0.00750519	0.199501	0.64823	1.33427	0.0243821	0.479116	0.628862	translation
ENSMUSG00000029486	Mrpl1	-1.13581	0.0195085	-0.508094	1	-1.64391	2.1341e-06	TE	TE	-1.65208	0.00417192	-0.301604	0.643607	-1.70934	0.0170331	-1.2621	0.709004	translation
ENSMUSG00000069045	Ddx3y	-0.92507	0.0195085	-0.208667	1	-1.13374	0.000249933	TE	TE	-1.14709	0.00761223	-0.0747491	0.894762	-1.14878	0.0243821	-0.133248	0.956316	translation
ENSMUSG00000028108	Ecm1	1.53513	0.0197401	0.244695	1	1.77982	4.7056e-05	TE	TE	1.73645	0.0056742	-0.124258	0.919532	1.7566	0.0204684	-1.38654	0.755936	translation
ENSMUSG00000040356	Skiv2l	1.37509	0.0197401	0.399682	1	1.77477	1.77996e-05	TE	TE	1.72146	0.00443176	0.227368	0.754686	1.60707	0.0170331	-1.7736	0.448749	translation
ENSMUSG00000022525	Hrasls	-1.83151	0.0197747	-0.554017	1	-2.38553	2.45426e-05	TE	TE	-2.3413	0.00397673	-0.511157	0.33343	-1.77683	0.0430768	0.130687	0.928278	translation
ENSMUSG00000026923	Notch1	1.341	0.0197747	-0.0423021	1	1.2987	0.00454702	TE	TE	1.21615	0.0223858	-0.00385347	0.996305	1.22153	0.0300149	-0.541695	0.521221	translation
ENSMUSG00000025525	Apool	-1.64439	0.0201889	-0.225216	1	-1.8696	0.000122815	TE	TE	-2.0053	0.00907952	-0.570979	0.601762	-1.62588	0.0278393	1.23568	0.558589	translation
[truncated: 7,699 more rows]

## Sheet: TAC2w_vs_swim2w
row.names	symbol	log2FC.inter	padj.inter	log2FC.rna	padj.rna	log2FC.ribo	padj.ribo	hue	class	translatedmRNA.apvEff	translatedmRNA.apvRvmPAdj	totalmRNA.apvEff	totalmRNA.apvRvmPAdj	translation.apvEff	translation.apvRvmPAdj	buffering.apvEff	buffering.apvRvmPAdj	singleRegMode
[truncated: 7,976 more rows]

[truncated: 4 more sheets: Legend, upset, scatter, enrichment]
